# Supplementary material for: Repurposing cycloaddition of β-carbonyl phosphonate and azide to synthesize triazolyl phosphonates via ionic-liquid-based data-driven screening
Source: Royal Society of Chemistry journal article supplement (doi:10.1039/d2gc02461f), 2022-01-01
Supplement: d2gc02461f1.pdf [file d2gc02461f1.pdf]

*Supporting Information for*  
**Repurposing Cycloaddition of  $\beta$ -carbonyl Phosphonate and Azide to Synthesize Triazolyl phosphonates via Ionic-Liquid-Based Data-Driven Screening**

**Content**

**Supplementary Methods**

|                                                                                        |       |
|----------------------------------------------------------------------------------------|-------|
| General information and materials.....                                                 | 2     |
| Abbreviations.....                                                                     | 3     |
| Preparative methods of the ionic liquid pool.....                                      | 4     |
| Screening reactivity of $\beta$ -carbonyl phosphonates with the ionic liquid pool..... | 4     |
| NMR experimental procedures of mechanism investigations.....                           | 5     |
| Preparative methods of 1,2,3-triazolyl phosphonates.....                               | 5     |
| High-throughput workflow for syntheses of 312 1,2,3-triazolyl phosphonates.....        | 6     |
| Bioactivity valuations of 312 1,2,3-triazolyl phosphonates.....                        | 6-7   |
| Supplementary Table S1.....                                                            | 8     |
| Supplementary Table S2.....                                                            | 9-15  |
| Supplementary Figure S1 to Figure S9.....                                              | 16-21 |

**Data of compound characterizations and biological activity evaluations**

|                                                                                                                                                               |       |
|---------------------------------------------------------------------------------------------------------------------------------------------------------------|-------|
| Characterizations of synthesized ionic liquids.....                                                                                                           | 22-32 |
| Characterizations of synthesized 1,2,3-triazolyl phosphonates compounds.....                                                                                  | 33-52 |
| Characterizations of the library of 312 compounds (Supplementary Table S3-Table S14).....                                                                     | 53-86 |
| Inhibition rates and EC50 values of compounds of TA101, TA125, and TA 133 (Supplementary Table S15-Table S18 and Supplementary Figure S10 to Figure S14)..... | 87-90 |

**Copies of NMR spectra of ionic liquids and phosphonates**

|                                                                                       |         |
|---------------------------------------------------------------------------------------|---------|
| $^1\text{H}$ NMR and $^{13}\text{C}$ NMR spectra of ionic liquids.....                | 91-140  |
| $^1\text{H}$ NMR and $^{31}\text{P}$ NMR spectra of 1,2,3-triazolyl phosphonates..... | 141-205 |

|                                      |            |
|--------------------------------------|------------|
| <b>Supplementary references.....</b> | <b>205</b> |
|--------------------------------------|------------|

## General Information and Materials:

Solvents were dried using traditional methods and freshly distilled before use. Reactions were monitored by thin-layer chromatography (TLC) on silica gel GF254 precoated plates and RP-HPLC. Compounds were detected under UV light and/or visualized by phosphomolybdic acid in ethanol solution. Solvents were evaporated under reduced pressure and below 50 °C. Mass spectra were obtained on Bruker APEX. High-resolution MS was performed with Bruker BIFLEX III and Bruker Daltonics. Inc. APEX II. <sup>1</sup>H NMR spectra were recorded on 400 or 600 MHz using TMS as the internal standard. Chemical shifts were reported in parts per million and coupling constants were quoted in Hz. β-carbonyl phosphonates and azides were prepared based on the methods in the literatures in our previous work <sup>[1-3]</sup>. GC-MS analyses were performed with Thermo Fisher TRACE\_1300\_1310 for identifications of the compound library of 312 1,2,3-triazolyl phosphonates. 1,8-Diazabicyclo[5.4.0]undec-7-ene (Aldrich, 99%); 1,1,3,3-Tetramethylguanidine (Macklin, 99%); 7-Methyl-1,5,7-triazabicyclo[4.4.0]dec-5-ene (Aldrich, 99%); 1,5,7-triazabicyclo [4.4.0] decyl-5-ene (Macklin, 99%); 4-Dimethylaminopyridine (Macklin, 99%); 2-Aminopyridine; [Choline][OH] (Macklin, 45% aqueous solution); 1-Methylimidazole (Macklin, 99%); Ethanolamine (Alfa, 99%); Diethanolamine (Aldrich, 99%); Triethanolamine ((Macklin, 99%)); N,N-Dimethylethanolamine (Aldrich, 99%); Acetate (Aladdin, 99.5%); Propionic Acid (Alfa, 99%); Butyric acid (Alfa,99+%);Valeric acid (Sigma-Aldrich, 99%); Benzoic acid (Aladdin, 99.5%); *p*-Methoxybenzoic acid (Aladdin, 99%); Glycolic acid (Aladdin, 98%); Lactic acid (Alfa, 98%); Crotonic acid (Macklin, 98%); Trifluoroacetic Acid (Macklin, 99.5%); Phosphoric acid (Aladdin, 99%).

## Abbreviations:

[DBU] = 1,8-Diazabicyclo[5.4.0]undec-7-ene;  
[TMG] = N,N'-Tetramethylguanidine;  
[MTBD] = 7-Methyl-1,5,7-triazabicyclo[4.4.0]dec-5-ene  
[TBD] = 1,5,7-triazabicyclo [4.4.0] decyl-5-ene  
[DMAP] = 4-Dimethylaminopyridine  
[2-AnPy] = 2-Aminopyridine  
[MEIM] = N,N-Dimethylethanolamine  
[MEOA] = 2-Methylaminoethanol  
[DEOA] = Diethanolamine  
[TEOA] = Triethanolamine  
[DMEOA] = N,N-Dimethylethanolamine;  
[Ac] = Acetate  
[Pro] = Propionic Acid  
[But] = Butyric acid  
[Pen] = Valeric acid  
[Ben] = Benzoic acid  
[p-Ani] = *p*-Methoxybenzoic acid  
[Gly] = Glycolic acid  
[Lac] = Lactic acid  
[Cro] = Crotonic acid  
[TFA] = Trifluoroacetic Acid  
[Pho] = Phosphoric acid

### **Preparative methods of the ionic liquid pool**

1.5 mL centrifuge tubes were used to form a square of 144 tubes of 12 base×12 acid cross combinations. Then corresponding base (0.02 mmol) was added to each centrifuge tube in the ice bath, and 100  $\mu$ L of methanol solution was added. The acid corresponding to the same amount of substance (0.02 mmol) was also added. When the heat release was over, covered the lid and removed the tubes from the ice bath. Place each of the tubes in a shaker for 48 hours at room temperature. The solvents were evaporated under reduced pressure after reactions. Considering the possible volatilities of acids and bases that are used for the building of the IL pool, we dried the samples under reduced pressures at 50°C for 12 hours. The dried ILs were checked by  $^1\text{H}$  NMR to confirm the 1:1 stoichiometry of cations to anions, and the water contents were measured by Karl Fisher experiments to less than 0.5%.

#### **Screening reactivity of $\beta$ -carbonyl phosphonates with the ionic liquid pool**

Adding 200  $\mu$ L of stock solution (1.04 mmol/L at a concentration of 4-(Trifluoromethyl)phenyl azide (**1a**) soluble in phosphonate (**2a**) to each of the 144 centrifuge tubes that contained ionic liquids prepared by the above method. After the lid was tightly closed, each of the tubes was shocked on an oscillator for 20 seconds, then incubated in a table concentrator shaker at 30°C for 24 hours. 300  $\mu$ L ethyl acetate and 300  $\mu$ L water were added to the reaction mixture to accelerate the separations of products from ionic liquids. Each of the phases of ethyl acetate was transferred into the glass vials containing 1-methylimidazole as the internal standards, and then run Gas Chromatograph with autosamplers. The qualitative analysis of products was conducted using a Gas Chromatograph (SHIMADZU GC-2014ATF+APL) and by comparing it with authentic samples. The yields of compounds were quantitatively analyzed by Gas Chromatograph (SHIMADZU GC-2014ATF+APL, equipped with a hydrogen flame-ionization detector, full electric pneumatic control, 280°C) based on internal standard curves and areas of integrated peak areas according to the Gas Chromatograph traces.

For the yields of the triazolyl phosphonates (compound **3a**)

The yield of product **3a** = Moles of product **3a** / Moles of phosphonate **2a**  $\times$  100%

For the yields of triazoles (compound **4a**)

The yield of product **4a** = Moles of product **4a** / Moles of phosphonate **2a** ×100%

For the calculations of reaction selectivity

Selectivity = (Yield of product **3a**)/(Yield of product **3a** + Yield of product **4a**) ×100%

### **NMR experimental procedures of mechanistic investigations**

The NMR spectra were recorded on BrukerAnanc 400. The spectra were detected at 303K. To eliminate the effect of solvent, Wilmad coaxial insert NMR tubes were used for <sup>1</sup>H NMR and <sup>31</sup>P NMR. For <sup>1</sup>H NMR, the mixtures of phosphonates and ionic liquids with different molar ratios were prepared. DMSO-d<sub>6</sub> as an internal standard was added to the inner tube, and the sample was added to the outer tube. The mixture (0.3 mL) was added to the outer tube, and the inner tube was inserted. The temperature was controlled at 303K. For <sup>31</sup>P NMR, the mixtures of phosphonates and ionic liquids with different molar ratios (1:2, 1:1, and 2:1) were prepared. DMSO-d<sub>6</sub> as an internal standard was added to the inner tube, and the sample was added to the outer tube. The mixture (0.3 mL) was added to the outer tube, and the inner tube was inserted. The temperature was controlled at 303K.

### **Preparative methods of 1,2,3-triazolyl phosphonates**

To an oven-dried round bottom flask, azide (0.20 mmol), phosphonates (0.22 mmol), and choline acetate (0.20 mmol) were added. The reaction mixture was stirred at 30°C for 24 hours. After the completion of the reaction, the products and ionic liquids could separate automatically. Water was added to solute ionic liquids, and the products could be obtained by filtrating. Alternatively, ethyl acetate could be added to the reaction mixture to accelerate the separations of products from ionic liquids, and the products were obtained after evaporations to get off the solvents and dried in a vacuum drying oven. The structures of triazolyl phosphonates were identified by <sup>1</sup>H NMR, <sup>13</sup>C NMR, <sup>31</sup>P NMR, and HRMS. To study the reusability, the ionic liquid was dried under a vacuum at 50°C for 24 hours

### **High-throughput workflow for syntheses of 312 1,2,3-triazolyl phosphonates**

1.5 mL Centrifuge tubes ( $\times 312$ ) that each containing 0.05 mmol choline acetate, were used to form a square of 12 phosphonate $\times 25$  azide cross combinations. The corresponding 12 phosphonates (0.05 mmol) were added to each centrifuge tube, and then 26 azides were added to each centrifuge tube. After the lid was tightly closed, each of the tubes was shocked on an oscillator for 20 seconds, then incubated in a table concentrator shaker at 30°C for 24 hours. 300  $\mu$ l ethyl acetate and 300  $\mu$ l saturated brine were added to the tubes to accelerate the separations of products from the ionic liquids. Each of the phases of ethyl acetate was transferred into the glass vials. After identifying the molecular weights of the products by Thermo Fisher TRACE\_1300\_1310, the solvents were removed under reduced pressure and the products were used in situ for the followed antifungal biological activity assays.

### **Bioactivity evaluations of 300 1,2,3-triazolyl phosphonates**

To evaluate the antifungal activity of 1,2,3-triazolyl phosphonates, disc diffusion experiments were first performed. The spores of *Rhizoctonia solani* ((*Thanatephorus cucumeris* NBRC 6298), purchased from Guangdong culture collection center) were cultured into Petri dishes containing potato dextrose agar (PDA). The concentrated phosphonates (5mg/mL) were applied to sterilized paper discs (5mm in diameter) using a capillary pipette. The degree of growth inhibition was indicated by comparisons of the non-growth zone. Based on the results of the disc diffusion experiments, compounds TA-101, TA-133, and TA-125 were further investigated as the antifungal agents using the followed Fungicide Disk Assays.

Fungicide Disk Assays: Compounds in EtOH were added to 10 mL of PDA, in a concentration of 5 mg/mL、1mg/mL、0.5 mg/mL、0.05 mg/mL and 0.005mg/mL. PDA plates containing only the solvents were used as controls. Seven-day-old cultures of test *Thanatephorus cucumeris* NBRC 6298, grown on PDA plates were used as an inoculum put onto the control and test plates. After 5 days of incubation at 25 °C, the mycelial growth diameter was measured, and the percentage of inhibition to the control was calculated according to the following formula described by Shin et al. <sup>[4]</sup> as follows:

$$\text{inhibition (\%)} = \frac{(\text{growth diameter in untreated control} - \text{growth diameter in treatment}) \times 100}{[\text{growth diameter in untreated control}]}$$

**Table S1:** Chemical structures of ionic liquids

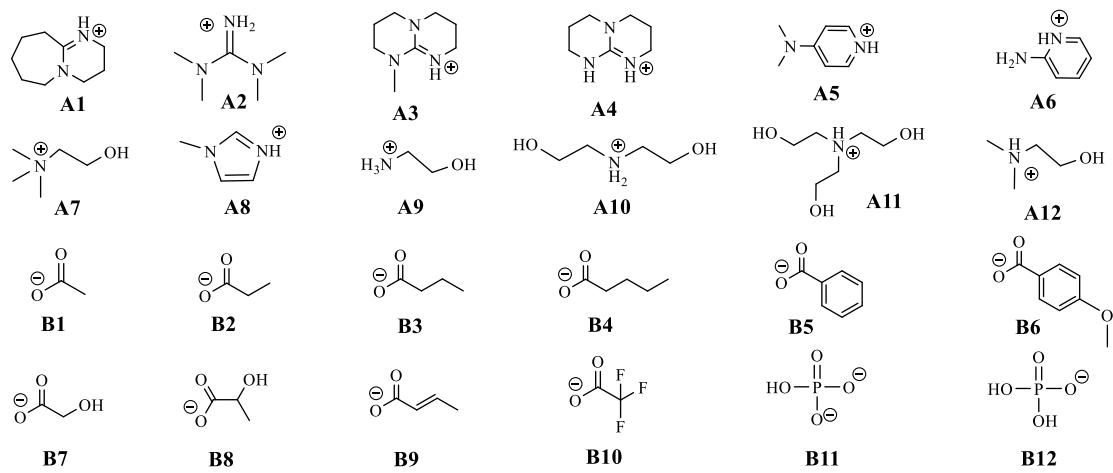

**Table S2:** Screening results using ionic liquid pool



| Entry <sup>a</sup> | Name of ILs |                                        | Yield 3a        | Yield 4a | Selectivity     |
|--------------------|-------------|----------------------------------------|-----------------|----------|-----------------|
|                    |             |                                        | (%)             | (%)      | 3a<br>(%)       |
| 1                  | A1-B1       | [DBU][Ac]                              | 70              | 3        | 96              |
| 2                  | A1-B2       | [DBU][Pro]                             | 50              | 1        | 98              |
| 3                  | A1-B3       | [DBU][But]                             | 30              | 5        | 86              |
| 4                  | A1-B4       | [DBU][Val]                             | 47              | 1        | 98              |
| 5                  | A1-B5       | [DBU][Ben]                             | 41              | 3        | 93              |
| 6                  | A1-B6       | [DBU][Ani]                             | -- <sup>b</sup> | 5        | -- <sup>c</sup> |
| 7                  | A1-B7       | [DBU][Gly]                             | 42              | 3        | 93              |
| 8                  | A1-B8       | [DBU][Lac]                             | 21              | 7        | 75              |
| 9                  | A1-B9       | [DBU][Cro]                             | 55              | 2        | 96              |
| 10                 | A1-B10      | [DBU][TFA]                             | -- <sup>b</sup> | 6        | -- <sup>c</sup> |
| 11                 | A1-B11      | [DBU][H <sub>2</sub> PO <sub>4</sub> ] | 40              | 5        | 89              |
| 12                 | A1-B12      | [DBU] <sub>2</sub> [HPO <sub>4</sub> ] | -- <sup>b</sup> | 5        | -- <sup>c</sup> |
| 13                 | A2-B1       | [TMG][Ac]                              | 78              | 5        | 94              |
| 14                 | A2-B2       | [TMG][Pro]                             | 44              | 5        | 90              |
| 15                 | A2-B3       | [TMG][But]                             | 20              | 21       | 49              |
| 16                 | A2-B4       | [TMG][Val]                             | 53              | 2        | 96              |
| 17                 | A2-B5       | [TMG][Ben]                             | 40              | 3        | 93              |
| 18                 | A2-B6       | [TMG][Ani]                             | -- <sup>b</sup> | 4        | -- <sup>c</sup> |
| 19                 | A2-B7       | [TMG][Gly]                             | -- <sup>b</sup> | 10       | -- <sup>c</sup> |
| 20                 | A2-B8       | [TMG][Lac]                             | 6               | 5        | 55              |
| 21                 | A2-B9       | [TMG][Cro]                             | 90              | 5        | 95              |
| 22                 | A2-B10      | [TMG][TFA]                             | 5               | 8        | 38              |

---

|    |        |                                         |                 |    |                 |
|----|--------|-----------------------------------------|-----------------|----|-----------------|
| 23 | A2-B11 | [TMG][H <sub>2</sub> PO <sub>4</sub> ]  | 13              | 4  | 76              |
| 24 | A2-B12 | [TMG] <sub>2</sub> [HPO <sub>4</sub> ]  | 20              | 5  | 80              |
| 25 | A3-B1  | [MTBD][Ac]                              | 22              | 2  | 92              |
| 26 | A3-B2  | [MTBD][Pro]                             | 27              | 9  | 75              |
| 27 | A3-B3  | [MTBD][But]                             | 27              | 10 | 73              |
| 28 | A3-B4  | [MTBD][Val]                             | 23              | 9  | 72              |
| 29 | A3-B5  | [MTBD][Ben]                             | 55              | 11 | 83              |
| 30 | A3-B6  | [MTBD][Ani]                             | 53              | 13 | 80              |
| 31 | A3-B7  | [MTBD][Gly]                             | 80              | 11 | 88              |
| 32 | A3-B8  | [MTBD][Lac]                             | 30              | 3  | 91              |
| 33 | A3-B9  | [MTBD][Cro]                             | 33              | 2  | 94              |
| 34 | A3-B10 | [MTBD][TFA]                             | 0               | 5  | 0               |
| 35 | A3-B11 | [MTBD][H <sub>2</sub> PO <sub>4</sub> ] | 0               | 6  | 0               |
| 36 | A3-B12 | [MTBD] <sub>2</sub> [HPO <sub>4</sub> ] | 77              | 1  | 99              |
| 37 | A4-B1  | [TBD][Ac]                               | 90              | 7  | 93              |
| 38 | A4-B2  | [TBD][Pro]                              | 22              | 6  | 79              |
| 39 | A4-B3  | [TBD][But]                              | 14              | 9  | 61              |
| 40 | A4-B4  | [TBD][Val]                              | 6               | 9  | 40              |
| 41 | A4-B5  | [TBD][Ben]                              | -- <sup>b</sup> | 10 | -- <sup>c</sup> |
| 42 | A4-B6  | [TBD][Ani]                              | -- <sup>b</sup> | 9  | -- <sup>c</sup> |
| 43 | A4-B7  | [TBD][Gly]                              | -- <sup>b</sup> | 9  | -- <sup>c</sup> |
| 44 | A4-B8  | [TBD][Lac]                              | -- <sup>b</sup> | 3  | -- <sup>c</sup> |
| 45 | A4-B9  | [TBD][Cro]                              | 19              | 3  | 86              |
| 46 | A4-B10 | [TBD][TFA]                              | -- <sup>b</sup> | 4  | -- <sup>c</sup> |

---

---

|    |        |                                         |                 |                 |                 |
|----|--------|-----------------------------------------|-----------------|-----------------|-----------------|
| 47 | A4-B11 | [TBD][H <sub>2</sub> PO <sub>4</sub> ]  | -- <sup>b</sup> | 4               | -- <sup>c</sup> |
| 48 | A4-B12 | [TBD] <sub>2</sub> [HPO <sub>4</sub> ]  | 61              | 8               | 88              |
| 49 | A5-B1  | [DMAP][Ac]                              | 6               | 5               | 55              |
| 50 | A5-B2  | [DMAP][Pro]                             | 5               | 8               | 38              |
| 51 | A5-B3  | [DMAP][But]                             | 4               | 6               | 40              |
| 52 | A5-B4  | [DMAP][Val]                             | 11              | -- <sup>b</sup> | 100             |
| 53 | A5-B5  | [DMAP][Ben]                             | -- <sup>b</sup> | -- <sup>b</sup> | -- <sup>c</sup> |
| 54 | A5-B6  | [DMAP][Ani]                             | -- <sup>b</sup> | -- <sup>b</sup> | -- <sup>c</sup> |
| 55 | A5-B7  | [DMAP][Gly]                             | -- <sup>b</sup> | 5               | -- <sup>c</sup> |
| 56 | A5-B8  | [DMAP][Lac]                             | -- <sup>b</sup> | 5               | -- <sup>c</sup> |
| 57 | A5-B9  | [DMAP][Cro]                             | 21              | 6               | 78              |
| 58 | A5-B10 | [DMAP][TFA]                             | --              | 5               | -- <sup>c</sup> |
| 59 | A5-B11 | [DMAP][H <sub>2</sub> PO <sub>4</sub> ] | 3               | 4               | 43              |
| 60 | A5-B12 | [DMAP] <sub>2</sub> [HPO <sub>4</sub> ] | 27              | 5               | 84              |
| 61 | A6-B1  | [2-AnPy][Ac]                            | -- <sup>b</sup> | 7               | -- <sup>c</sup> |
| 62 | A6-B2  | [2-AnPy][Pro]                           | -- <sup>b</sup> | 6               | -- <sup>c</sup> |
| 63 | A6-B3  | [2-AnPy][But]                           | -- <sup>b</sup> | 5               | -- <sup>c</sup> |
| 64 | A6-B4  | [2-AnPy][Val]                           | -- <sup>b</sup> | 9               | -- <sup>c</sup> |
| 65 | A6-B5  | [2-AnPy][Ben]                           | -- <sup>b</sup> | 8               | -- <sup>c</sup> |
| 66 | A6-B6  | [2-AnPy][Ani]                           | -- <sup>b</sup> | 5               | -- <sup>c</sup> |
| 67 | A6-B7  | [2-AnPy][Gly]                           | -- <sup>b</sup> | 10              | -- <sup>c</sup> |
| 68 | A6-B8  | [2-AnPy][Lac]                           | -- <sup>b</sup> | 10              | -- <sup>c</sup> |
| 69 | A6-B9  | [2-AnPy][Cro]                           | -- <sup>b</sup> | 9               | -- <sup>c</sup> |
| 70 | A6-B10 | [2-AnPy][TFA]                           | -- <sup>b</sup> | 9               | -- <sup>c</sup> |

---

---

|    |        |                                           |                 |                 |                 |
|----|--------|-------------------------------------------|-----------------|-----------------|-----------------|
| 71 | A6-B11 | [2-AnPy][H <sub>2</sub> PO <sub>4</sub> ] | -- <sup>b</sup> | 11              | -- <sup>c</sup> |
| 72 | A6-B12 | [2-AnPy] <sub>2</sub> [HPO <sub>4</sub> ] | -- <sup>b</sup> | 10              | -- <sup>c</sup> |
| 73 | A7-B1  | [CH][Ac]                                  | 95              | 3               | 97              |
| 74 | A7-B2  | [CH][Pro]                                 | 91              | 6               | 95              |
| 75 | A7-B3  | [CH][But]                                 | 94              | 3               | 97              |
| 76 | A7-B4  | [CH][Val]                                 | 91              | 2               | 98              |
| 77 | A7-B5  | [CH][Ben]                                 | 45              | 4               | 92              |
| 78 | A7-B6  | [CH][Ani]                                 | 44              | 5               | 90              |
| 79 | A7-B7  | [CH][Gly]                                 | -- <sup>b</sup> | 5               | -- <sup>c</sup> |
| 80 | A7-B8  | [CH][Lac]                                 | 5               | 3               | 63              |
| 81 | A7-B9  | [CH][Cro]                                 | 86              | -- <sup>b</sup> | 100             |
| 82 | A7-B10 | [CH][TFA]                                 | -- <sup>b</sup> | 4               | -- <sup>c</sup> |
| 83 | A7-B11 | [CH][H <sub>2</sub> PO <sub>4</sub> ]     | 10              | 3               | 77              |
| 84 | A7-B12 | [CH] <sub>2</sub> [HPO <sub>4</sub> ]     | 64              | 27              | 70              |
| 85 | A8-B1  | [MEIM][Ac]                                | -- <sup>b</sup> | 13              | -- <sup>c</sup> |
| 86 | A8-B2  | [MEIM][Pro]                               | -- <sup>b</sup> | 11              | -- <sup>c</sup> |
| 87 | A8-B3  | [MEIM][But]                               | -- <sup>b</sup> | 10              | -- <sup>c</sup> |
| 88 | A8-B4  | [MEIM][Val]                               | -- <sup>b</sup> | 11              | -- <sup>c</sup> |
| 89 | A8-B5  | [MEIM][Ben]                               | -- <sup>b</sup> | 8               | -- <sup>c</sup> |
| 90 | A8-B6  | [MEIM][Ani]                               | -- <sup>b</sup> | 11              | -- <sup>c</sup> |
| 91 | A8-B7  | [MEIM][Gly]                               | -- <sup>b</sup> | 8               | -- <sup>c</sup> |
| 92 | A8-B8  | [MEIM][Lac]                               | -- <sup>b</sup> | 11              | -- <sup>c</sup> |
| 93 | A8-B9  | [MEIM][Cro]                               | -- <sup>b</sup> | 13              | -- <sup>c</sup> |
| 94 | A8-B10 | [MEIM][TFA]                               | -- <sup>b</sup> | 13              | -- <sup>c</sup> |

---

---

|     |         |                                         |                 |    |                 |
|-----|---------|-----------------------------------------|-----------------|----|-----------------|
| 95  | A8-B11  | [MEIM][H <sub>2</sub> PO <sub>4</sub> ] | -- <sup>b</sup> | 6  | -- <sup>c</sup> |
| 96  | A8-B12  | [MEIM] <sub>2</sub> [HPO <sub>4</sub> ] | -- <sup>b</sup> | 7  | -- <sup>c</sup> |
| 97  | A9-B1   | [EOA][Ac]                               | 10              | 7  | 59              |
| 98  | A9-B2   | [EOA][Pro]                              | 7               | 10 | 41              |
| 99  | A9-B3   | [EOA][But]                              | 8               | 3  | 73              |
| 100 | A9-B4   | [EOA][Val]                              | 4               | 8  | 33              |
| 101 | A9-B5   | [EOA][Ben]                              | -- <sup>b</sup> | 9  | -- <sup>c</sup> |
| 102 | A9-B6   | [EOA][Ani]                              | 5               | 12 | 29              |
| 103 | A9-B7   | [EOA][Gly]                              | -- <sup>b</sup> | 17 | -- <sup>c</sup> |
| 104 | A9-B8   | [EOA][Lac]                              | -- <sup>b</sup> | 21 | -- <sup>c</sup> |
| 105 | A9-B9   | [EOA][Cro]                              | -- <sup>b</sup> | 13 | -- <sup>c</sup> |
| 106 | A9-B10  | [EOA][Tfa]                              | -- <sup>b</sup> | 12 | -- <sup>c</sup> |
| 107 | A9-B11  | [EOA][H <sub>2</sub> PO <sub>4</sub> ]  | -- <sup>b</sup> | 13 | -- <sup>c</sup> |
| 108 | A9-B12  | [EOA] <sub>2</sub> [HPO <sub>4</sub> ]  | -- <sup>b</sup> | 12 | -- <sup>c</sup> |
| 109 | A10-B1  | [DEOA][Ac]                              | -- <sup>b</sup> | 6  | -- <sup>c</sup> |
| 110 | A10-B2  | [DEOA][Pro]                             | -- <sup>b</sup> | 5  | -- <sup>c</sup> |
| 111 | A10-B3  | [DEOA][But]                             | -- <sup>b</sup> | 4  | -- <sup>c</sup> |
| 112 | A10-B4  | [DEOA][Val]                             | --              | 5  | -- <sup>c</sup> |
| 113 | A10-B5  | [DEOA][Ben]                             | 1               | 6  | 14              |
| 114 | A10-B6  | [DEOA][Ani]                             | -- <sup>b</sup> | 4  | -- <sup>c</sup> |
| 115 | A10-B7  | [DEOA][Gly]                             | -- <sup>b</sup> | 7  | -- <sup>c</sup> |
| 116 | A10-B8  | [DEOA][Lac]                             | -- <sup>b</sup> | 6  | -- <sup>c</sup> |
| 117 | A10-B9  | [DEOA][Cro]                             | -- <sup>b</sup> | 3  | -- <sup>c</sup> |
| 118 | A10-B10 | [DEOA][TFA]                             | -- <sup>b</sup> | 3  | -- <sup>c</sup> |

---

---

|     |         |                                         |                 |    |                 |
|-----|---------|-----------------------------------------|-----------------|----|-----------------|
| 119 | A10-B11 | [DEOA][H <sub>2</sub> PO <sub>4</sub> ] | -- <sup>b</sup> | 7  | -- <sup>c</sup> |
| 120 | A10-B12 | [DEOA] <sub>2</sub> [HPO <sub>4</sub> ] | 1               | 6  | 14              |
| 121 | A11-B1  | [TEOA][Ac]                              | -- <sup>b</sup> | 7  | -- <sup>c</sup> |
| 122 | A11-B2  | [TEOA][Pro]                             | -- <sup>b</sup> | 6  | -- <sup>c</sup> |
| 123 | A11-B3  | [TEOA][But]                             | -- <sup>b</sup> | 9  | -- <sup>c</sup> |
| 124 | A11-B4  | [TEOA][Val]                             | -- <sup>b</sup> | 7  | -- <sup>c</sup> |
| 125 | A11-B5  | [TEOA][Ben]                             | -- <sup>b</sup> | 10 | -- <sup>c</sup> |
| 126 | A11-B6  | [TEOA][Ani]                             | -- <sup>b</sup> | 11 | -- <sup>c</sup> |
| 127 | A11-B7  | [TEOA][Gly]                             | -- <sup>b</sup> | 8  | -- <sup>c</sup> |
| 128 | A11-B8  | [TEOA][Lac]                             | -- <sup>b</sup> | 9  | -- <sup>c</sup> |
| 129 | A11-B9  | [TEOA][Cro]                             | -- <sup>b</sup> | 9  | -- <sup>c</sup> |
| 130 | A11-B10 | [TEOA][TFA]                             | -- <sup>b</sup> | 9  | -- <sup>c</sup> |
| 131 | A11-B11 | [TEOA][H <sub>2</sub> PO <sub>4</sub> ] | -- <sup>b</sup> | 12 | -- <sup>c</sup> |
| 132 | A11-B12 | [TEOA] <sub>2</sub> [HPO <sub>4</sub> ] | -- <sup>b</sup> | 17 | -- <sup>c</sup> |
| 133 | A12-B1  | [DMEOA][Ac]                             | -- <sup>b</sup> | 8  | -- <sup>c</sup> |
| 134 | A12-B2  | [DMEOA][Pro]                            | -- <sup>b</sup> | 8  | -- <sup>c</sup> |
| 135 | A12-B3  | [DMEOA][But]                            | -- <sup>b</sup> | 8  | -- <sup>c</sup> |
| 136 | A12-B4  | [DMEOA][Val]                            | -- <sup>b</sup> | 9  | -- <sup>c</sup> |
| 137 | A12-B5  | [DMEOA][Ben]                            | -- <sup>b</sup> | 17 | -- <sup>c</sup> |
| 138 | A12-B6  | [DMEOA][Ani]                            | -- <sup>b</sup> | 9  | -- <sup>c</sup> |
| 139 | A12-B7  | [DMEOA][Gly]                            | -- <sup>b</sup> | 10 | -- <sup>c</sup> |
| 140 | A12-B8  | [DMEOA][Lac]                            | -- <sup>b</sup> | 7  | -- <sup>c</sup> |
| 141 | A12-B9  | [DMEOA][Cro]                            | -- <sup>b</sup> | 6  | -- <sup>c</sup> |
| 142 | A12-B10 | [DMEOA][TFA]                            | -- <sup>b</sup> | 7  | -- <sup>c</sup> |

---

---

|     |         |                                          |                 |   |                 |
|-----|---------|------------------------------------------|-----------------|---|-----------------|
| 143 | A12-B11 | [DMEOA][H <sub>2</sub> PO <sub>4</sub> ] | -- <sup>b</sup> | 1 | -- <sup>c</sup> |
| 144 | A12-B12 | [DMEOA] <sub>2</sub> [HPO <sub>4</sub> ] | -- <sup>b</sup> | 2 | -- <sup>c</sup> |

---

<sup>a</sup> The experiments were conducted based on the procedures described in the section “Screening reactivity of  $\beta$ -carbonyl phosphonates with the ionic liquid pool” in the supporting information. <sup>b</sup> Yields were less than 5%. <sup>c</sup> No calculations about reaction selectivity.

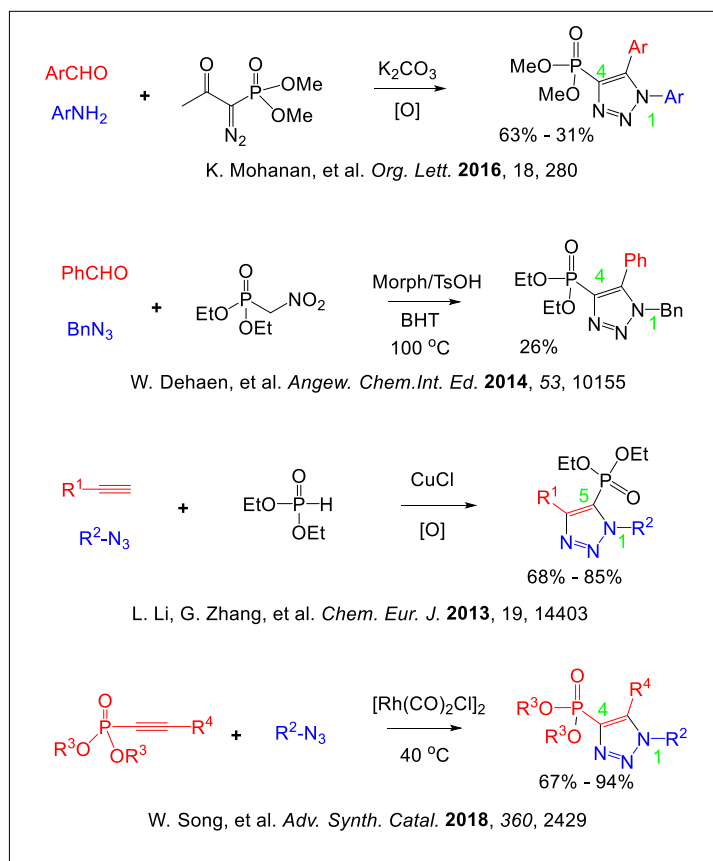

Figure S1 Synthesis of triazolyl phosphonates by different methods in literature.



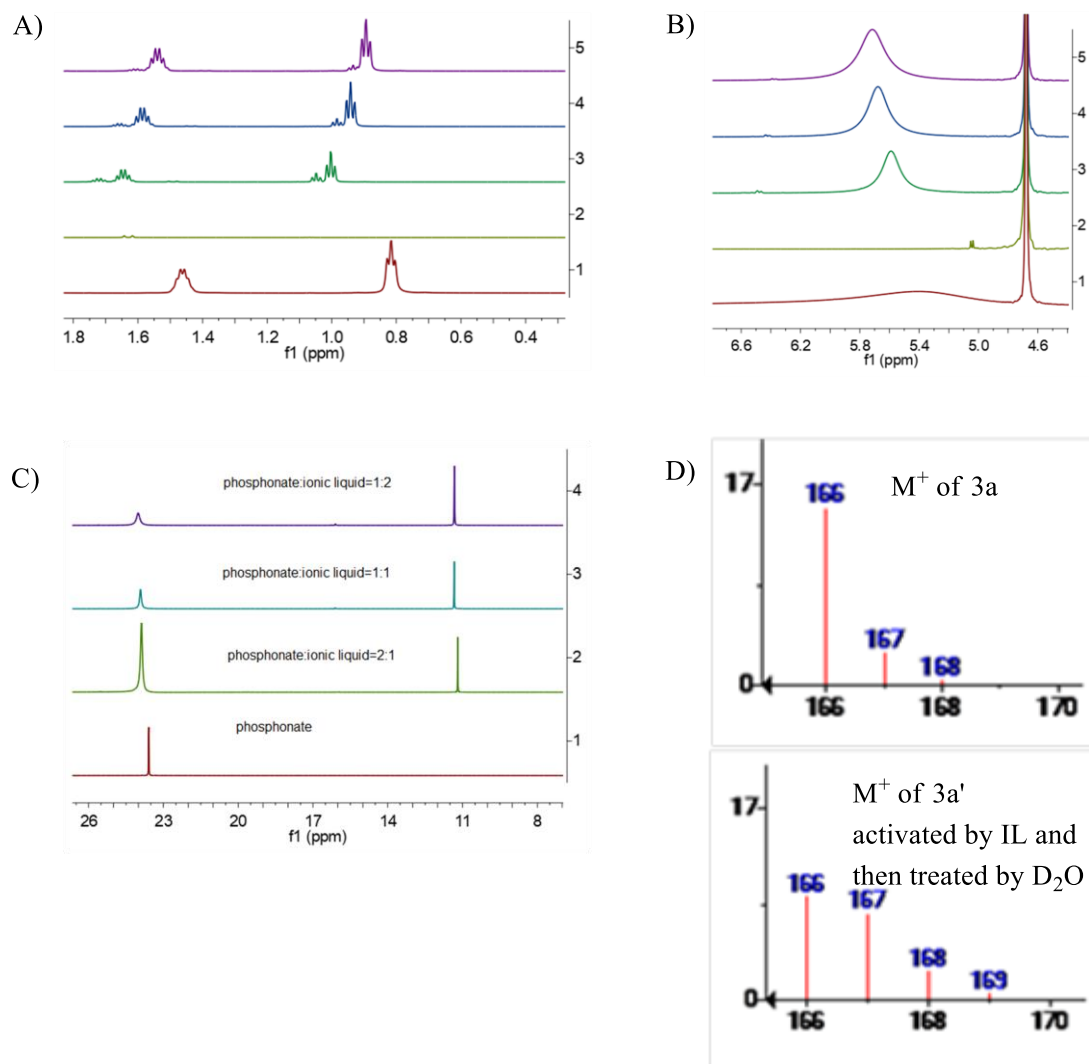

**Figure S2:** A) The magnified figure for  $^1\text{H}$  NMR spectra showing the changing of the proton on hydroxyl group of ionic liquid after mixing with carbonyl phosphonates; B) The magnified figure for  $^1\text{H}$  NMR spectra showing the changing of the proton on hydroxyl group of ionic liquid after mixing with carbonyl phosphonates; C)  $^{31}\text{P}$  NMR analyses of the effects of A7-B3 on the proton shifts of  $\beta$ -carbonyl phosphonates; D) Mass spectra analyses of the effects of A7-B3 on deuterium reaction with  $\beta$ -carbonyl phosphonates;

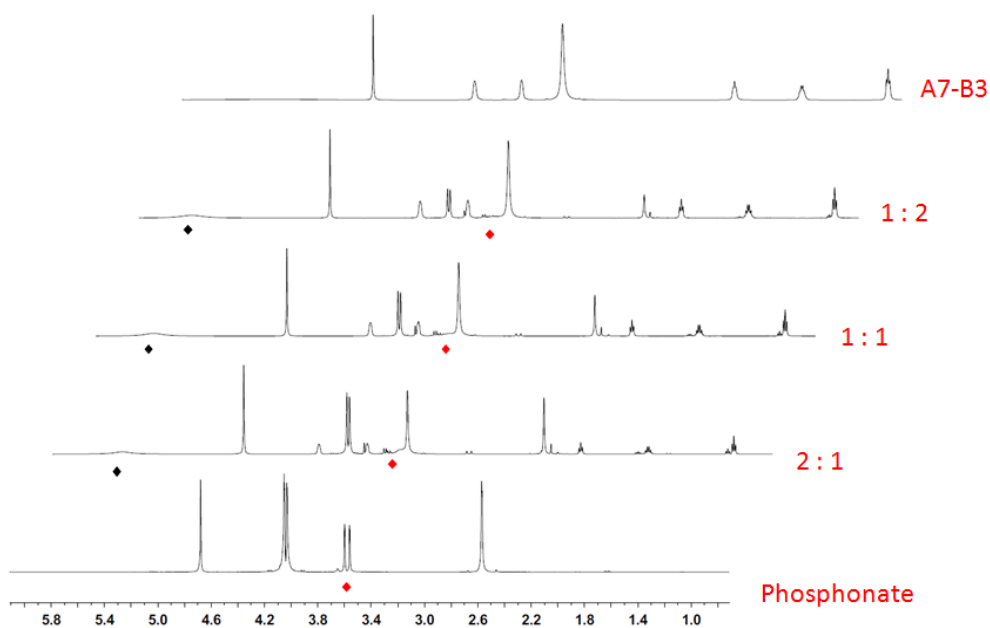

**Figure S3:**  $^1\text{H}$  nuclear magnetic resonance (NMR) spectra of ionic liquid A7-B3,  $\beta$ -carbonyl phosphonate **1b**, and the mixtures with A7-B3 and **1b** with various molar ratios (molar ratio of A7-B3 to **1b** = 1:2, 1:1 and 2:1). The resonance band of  $-\text{CH}_2-$  of  $\beta$ -carbonyl phosphonate is labeled by the red asterisk. The resonance band of the newly formed H-bond is labeled by a black asterisk.

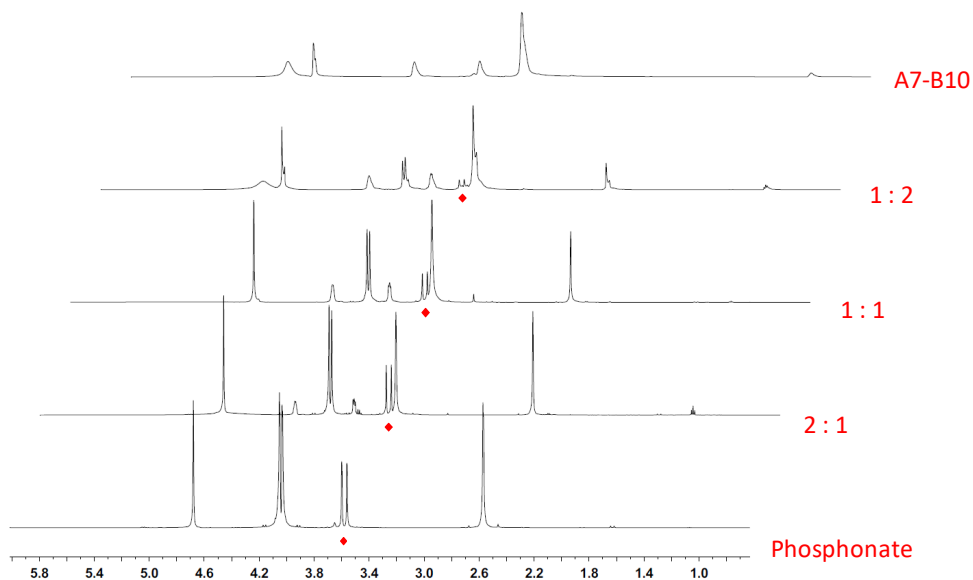

**Figure S4:**  $^1\text{H}$  nuclear magnetic resonance (NMR) spectra of ionic liquid A7-B10,  $\beta$ -carbonyl phosphonate **1b**, and the mixtures with A7-B10 and **1b** with various molar ratios (molar ratio of A7-B10 to **1b** = 1:2, 1:1 and 2:1). The resonance band of  $-\text{CH}_2-$  of  $\beta$ -carbonyl phosphonate is labeled

by the red asterisk.

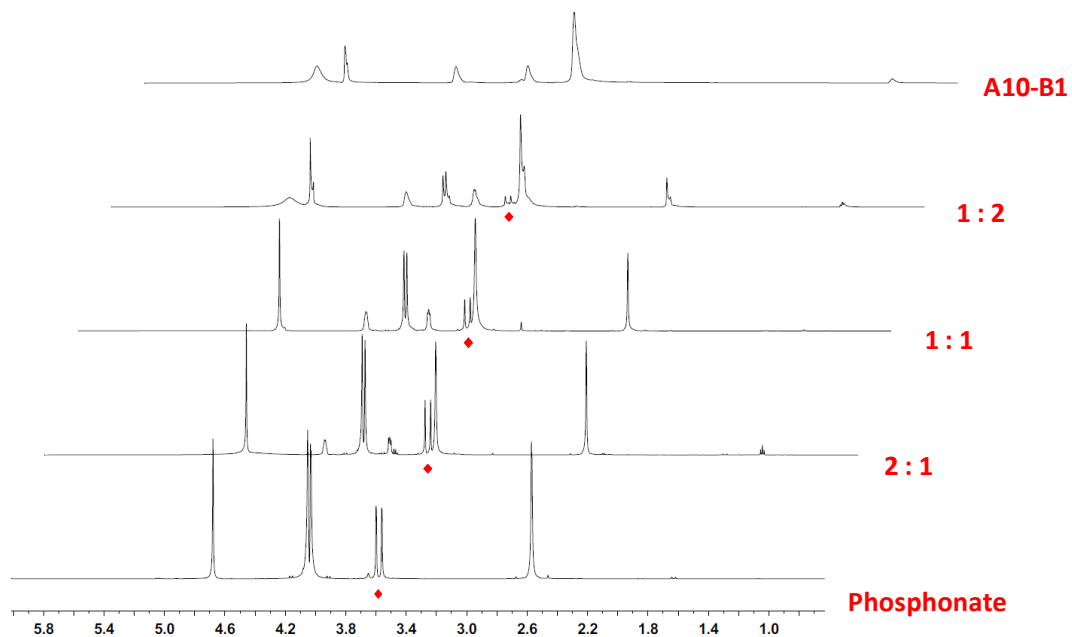

**Figure S5:** <sup>1</sup>H nuclear magnetic resonance (NMR) spectra of ionic liquid A10-B1,  $\beta$ -carbonyl phosphonate **1b**, and the mixtures with A10-B1 and **1b** with various molar ratios (molar ratio of A10-B1 to **1b** = 1:2, 1:1 and 2:1). The resonance band of -CH<sub>2</sub>- of  $\beta$ -carbonyl phosphonate is labeled by the red asterisk.

Phosphonate: IL  
(mol/mol = 1 : 2)

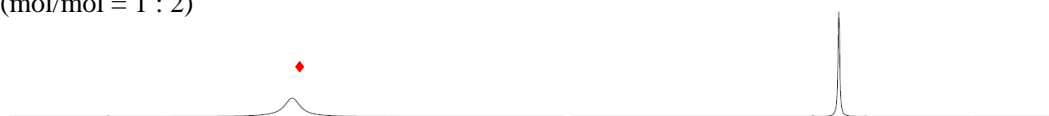

Phosphonate: IL  
(mol/mol = 1 : 1)

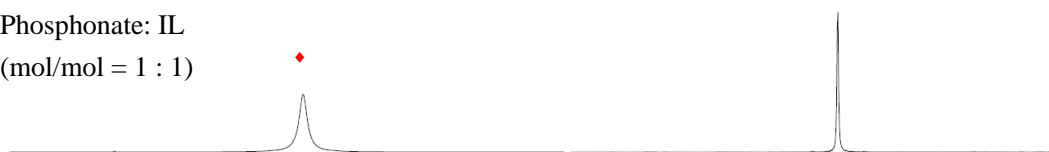

Phosphonate: IL  
(mol/mol = 2 : 1)

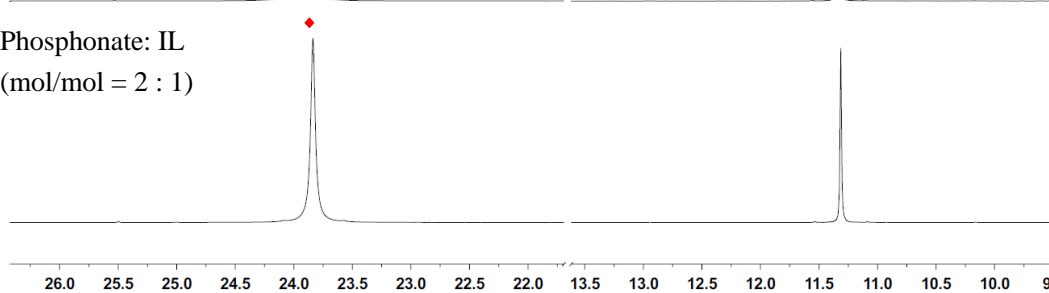

**Figure S6:**  $^{31}\text{P}$  nuclear magnetic resonance (NMR) spectra of the mixtures of A7-B3 and **1b** (with various molar ratios (molar ratio of **1b** to A7-B3 = 1:2, 1:1, and 2:1). The resonance band of P of  $\beta$ -carbonyl phosphonate is labeled by the red asterisk.

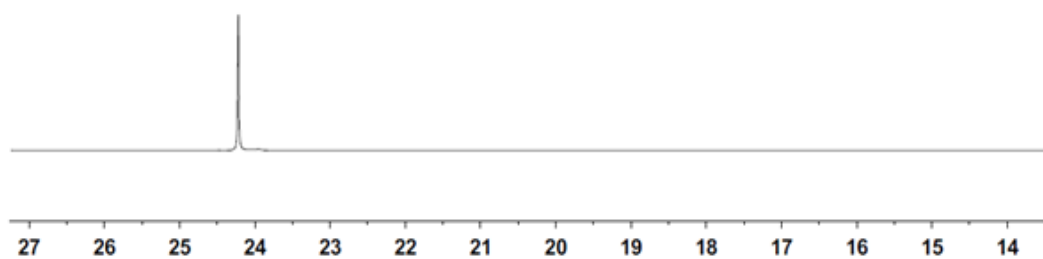

**Figure S7:**  $^{31}\text{P}$  nuclear magnetic resonance (NMR) spectra of the mixtures with A7-B3 and **1b** (molar ratio of **1b** to A7-B3 = 1:2) after  $\text{H}_2\text{O}$  was added.

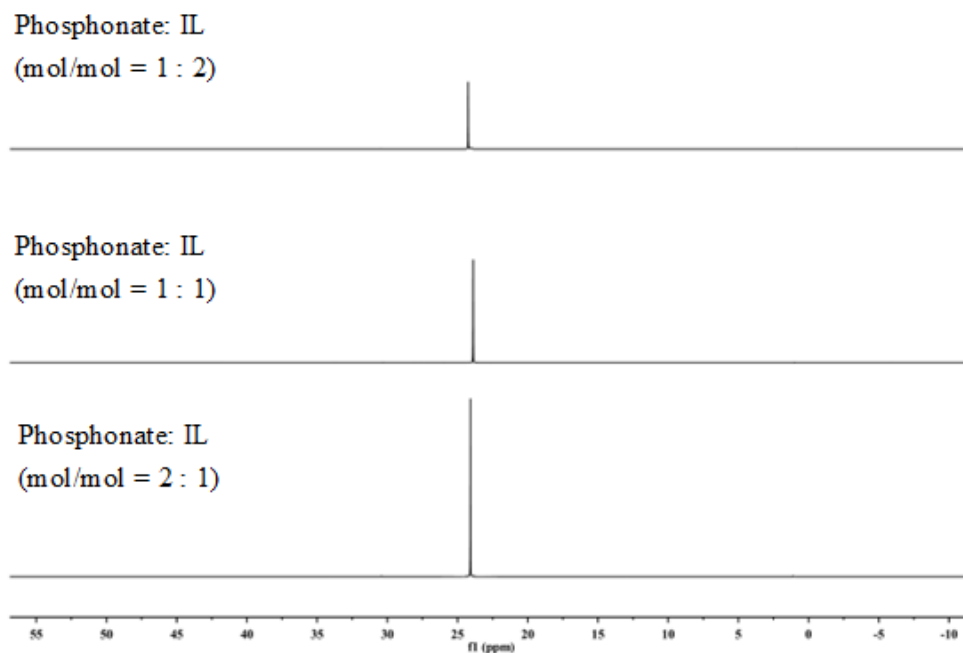

**Figure S8:**  $^{31}\text{P}$  nuclear magnetic resonance (NMR) spectra of the mixtures of A7-B10 and **1b** (with various molar ratios (molar ratio of **1b** to A7-B10 = 1:2, 1:1, and 2:1).

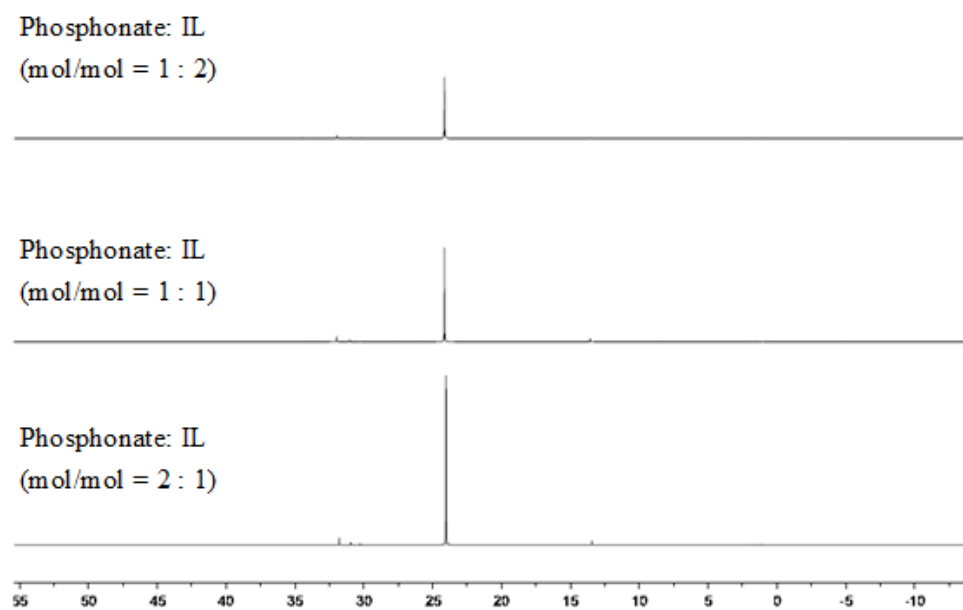

**Figure S9:**  $^{31}\text{P}$  nuclear magnetic resonance (NMR) spectra of the mixtures of A10-B1 and **1b** (with various molar ratios (molar ratio of **1b** to A10-B1 = 1:2, 1:1, and 2:1).

## Characterization of synthesized ionic liquids

### A3-B1: [MTBD][Ac]

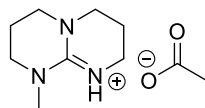

$^1\text{H}$  NMR (400 MHz,  $\text{D}_2\text{O}$ )  $\delta$  3.27 - 3.20 (m, 8H), 2.84 (s, 3H), 1.94 - 1.86 (m, 4H), 1.84 (s, 3H).  $^{13}\text{C}$  NMR (101 MHz,  $\text{D}_2\text{O}$ )  $\delta$  180.5, 151.1, 47.7, 47.1, 46.7, 38.4, 36.3, 22.9, 20.3.

### A3-B2: [MTBD][Pro]

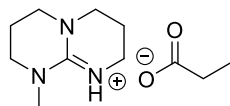

$^1\text{H}$  NMR (400 MHz,  $\text{D}_2\text{O}$ )  $\delta$  3.27 - 3.20 (m, 8H), 2.84 (s, 3H), 2.11 - 2.05 (m, 2H), 1.94 - 1.83 (m, 4H), 0.96 (t,  $J = 8.0\text{Hz}$ , 3H).  $^{13}\text{C}$  NMR (101 MHz,  $\text{D}_2\text{O}$ )  $\delta$  184.5, 151.0, 47.7, 47.1, 46.7, 38.4, 36.3, 30.7, 20.3, 10.2.

### A3-B3: [MTBD][But]

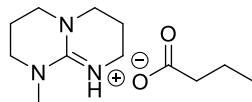

$^1\text{H}$  NMR (400 MHz,  $\text{D}_2\text{O}$ )  $\delta$  3.27 - 3.20 (m, 8H), 2.84 (s, 3H), 2.06 (t,  $J = 8.0\text{ Hz}$ , 2H), 1.94 - 1.83 (m, 4H), 1.51 - 1.42 (m, 2H), 0.80 (t,  $J = 8.0\text{ Hz}$ , 3H).  $^{13}\text{C}$  NMR (101 MHz,  $\text{D}_2\text{O}$ )  $\delta$  183.6, 151.0, 47.7, 47.1, 46.7, 39.7, 38.4, 36.3, 20.3, 19.4, 13.3.

### A3-B4: [MTBD][Val]

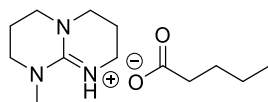

$^1\text{H}$  NMR (400 MHz,  $\text{D}_2\text{O}$ )  $\delta$  3.27 - 3.20 (m, 8H), 2.84 (s, 3H), 2.08 (t,  $J = 8.0\text{ Hz}$ , 2H), 1.94 - 1.84 (m, 4H), 1.47 - 1.40 (m, 2H), 1.25 - 1.16 (m, 2H), 0.80 (t,  $J = 8.0\text{ Hz}$ , 3H).  $^{13}\text{C}$  NMR (101 MHz,  $\text{D}_2\text{O}$ )  $\delta$  183.9, 151.0, 47.7, 47.1, 46.7, 38.4, 37.4, 36.3, 28.1, 22.0, 20.3, 13.2.

**A3-B5: [MTBD][Ben]**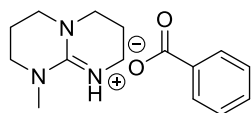

$^1\text{H}$  NMR (400 MHz,  $\text{D}_2\text{O}$ )  $\delta$  7.78 (d,  $J = 8.0$  Hz, 2H), 7.47 - 7.36 (m, 3H), 3.18 - 3.11 (m, 8H), 2.77 (s, 3H), 1.87 - 1.77 (m, 4H).  $^{13}\text{C}$  NMR (101 MHz,  $\text{D}_2\text{O}$ )  $\delta$  174.9, 150.6, 136.3, 131.1, 128.8, 128.2, 47.5, 46.9, 46.5, 38.3, 36.2, 20.1.

**A3-B6: [MTBD][Ani]**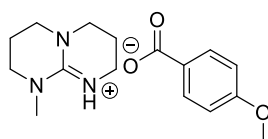

$^1\text{H}$  NMR (400 MHz,  $\text{D}_2\text{O}$ )  $\delta$  7.79 - 7.75 (m, 2H), 6.93 - 6.89 (m, 2H), 3.76 (s, 3H), 3.16 - 3.08 (m, 8H), 2.75 (s, 3H), 1.85 - 1.75 (m, 4H).  $^{13}\text{C}$  NMR (101 MHz,  $\text{D}_2\text{O}$ )  $\delta$  174.3, 161.1, 150.5, 131.0, 129.1, 113.2, 55.3, 47.5, 46.9, 46.5, 38.3, 36.1, 20.1.

**A3-B7: [MTBD][Gly]**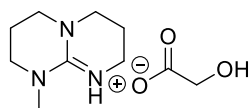

$^1\text{H}$  NMR (400 MHz,  $\text{D}_2\text{O}$ )  $\delta$  3.82 (s, 2H), 3.26 - 3.19 (m, 8H), 2.84 (s, 3H), 1.94 - 1.81 (m, 4H).  $^{13}\text{C}$  NMR (101 MHz,  $\text{D}_2\text{O}$ )  $\delta$  179.5, 151.1, 61.2, 47.7, 47.1, 46.7, 38.5, 36.3, 20.3.

**A3-B8: [MTBD][Lac]**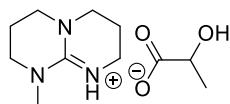

$^1\text{H}$  NMR (400 MHz,  $\text{D}_2\text{O}$ )  $\delta$  4.04 (q,  $J = 8.0$  Hz, 1H), 3.26 - 3.19 (m, 8H), 2.84 (s, 3H), 1.94 - 1.83 (m, 4H), 1.24 (d,  $J = 8.0$  Hz, 3H).  $^{13}\text{C}$  NMR (101 MHz,  $\text{D}_2\text{O}$ )  $\delta$  181.6, 151.1, 68.1, 47.7, 47.1, 46.7, 38.4, 36.3, 20.3, 20.0.

**A3-B9: [MTBD][Cro]**

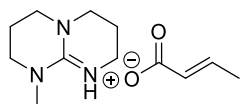

<sup>1</sup>H NMR (400 MHz, D<sub>2</sub>O) δ 6.62 - 6.53 (m, 1H), 5.74 (dd, *J* = 16.0, 4.0 Hz, 1H), 3.26 - 3.19 (m, 8H), 2.84 (s, 3H), 1.94 - 1.83 (m, 4H), 1.72 (dd, *J* = 8.0, 4.0 Hz, 3H). <sup>13</sup>C NMR (101 MHz, D<sub>2</sub>O) δ 175.3, 151.0, 141.4, 127.1, 47.7, 47.1, 46.7, 38.4, 36.3, 20.3, 17.0.

**A3-B10: [MTBD][TFA]**

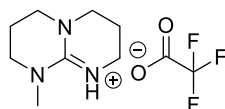

<sup>1</sup>H NMR (400 MHz, D<sub>2</sub>O) δ 3.27 - 3.20 (m, 8H), 2.85 (d, *J* = 4.0 Hz, 3H), 1.95 - 1.83 (m, 4H). <sup>13</sup>C NMR (101 MHz, D<sub>2</sub>O) δ 162.7 (q, *J*<sub>C-F</sub> = 40.4 Hz), 151.0, 116.4 (q, *J*<sub>C-F</sub> = 292.9 Hz), 47.7, 47.1, 46.7, 38.4, 36.3, 20.4, 20.2.

**A3-B11: [MTBD][HPO<sub>4</sub><sup>2-</sup>]**

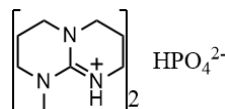

<sup>1</sup>H NMR (400 MHz, D<sub>2</sub>O) δ 3.26 - 3.19 (m, 8H), 2.84 (s, 3H), 1.93 - 1.82 (m, 4H). <sup>13</sup>C NMR (101 MHz, D<sub>2</sub>O) δ 151.1, 47.7, 47.1, 46.6, 38.4, 36.3, 20.3.

**A3-B12: [MTBD][H<sub>2</sub>PO<sub>4</sub><sup>-</sup>]**

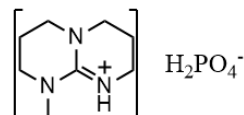

<sup>1</sup>H NMR (400 MHz, D<sub>2</sub>O) δ 3.25 - 3.17 (m, 16H), 2.82 (s, 6H), 1.92 - 1.81 (m, 8H). <sup>13</sup>C NMR (101 MHz, D<sub>2</sub>O) δ 151.1, 47.7, 47.1, 46.7, 38.4, 36.3, 20.3.

**A4-B1: [TBD][Ac]**

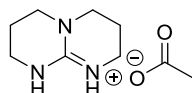



$^1\text{H}$  NMR (400 MHz,  $\text{D}_2\text{O}$ )  $\delta$  3.24 (t,  $J = 4.0$  Hz, 4H), 3.16 (t,  $J = 4.0$  Hz, 4H), 1.91 - 1.85 (m, 4H), 1.82 (s, 3H).  $^{13}\text{C}$  NMR (151 MHz,  $\text{D}_2\text{O}$ )  $\delta$  181.4, 151.0, 46.5, 37.8, 23.3, 20.2.

**A4-B2: [TBD][Pro]**

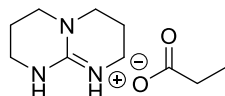

$^1\text{H}$  NMR (400 MHz,  $\text{D}_2\text{O}$ )  $\delta$  3.26 (t,  $J = 6.0$  Hz, 4H), 3.18 (t,  $J = 6.0$  Hz, 4H), 2.11 (q,  $J = 7.2$  Hz, 2H), 2.00 - 1.79 (m, 4H), 0.98 (t,  $J = 7.2$  Hz, 3H).  $^{13}\text{C}$  NMR (151 MHz,  $\text{D}_2\text{O}$ )  $\delta$  183.1, 150.9, 46.5, 37.8, 29.5, 20.2, 9.6.

**A4-B3: [TBD][But]**

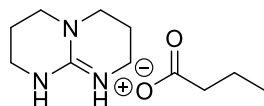

$^1\text{H}$  NMR (400 MHz,  $\text{D}_2\text{O}$ )  $\delta$  3.28 (t,  $J = 6.0$  Hz, 4H), 3.20 (t,  $J = 6.0$  Hz, 4H), 2.09 (t,  $J = 7.4$  Hz, 2H), 1.97 - 1.86 (m, 4H), 1.55 - 1.45 (m, 2H), 0.84 (t,  $J = 7.4$  Hz, 3H).  $^{13}\text{C}$  NMR (151 MHz,  $\text{D}_2\text{O}$ )  $\delta$  181.9, 150.9, 46.5, 38.0, 37.8, 20.2, 18.8, 13.0.

**A4-B4: [TBD][Val]**

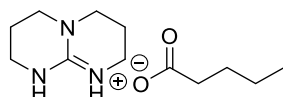

$^1\text{H}$  NMR (400 MHz,  $\text{D}_2\text{O}$ )  $\delta$  3.29 (t,  $J = 6.0$  Hz, 4H), 3.22 (t,  $J = 6.0$  Hz, 4H), 2.14 (t,  $J = 7.2$  Hz, 2H), 1.99 - 1.88 (m, 4H), 1.53 - 1.44 (m, 2H), 1.32 - 1.22 (m, 2H), 0.85 (t,  $J = 7.4$  Hz, 3H).  $^{13}\text{C}$  NMR (151 MHz,  $\text{D}_2\text{O}$ )  $\delta$  181.9, 150.9, 46.5, 37.8, 35.6, 27.3, 21.8, 20.2, 13.0.

**A4-B5: [TBD][Ben]**

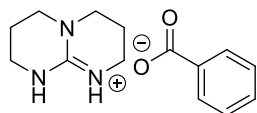

$^1\text{H}$  NMR (400 MHz,  $\text{D}_2\text{O}$ )  $\delta$  7.83 (d,  $J = 4.0$  Hz, 2H), 7.43 - 7.33 (m, 3H), 3.08 - 2.83

(m, 8H), 1.76 - 1.63 (m, 4H).  $^{13}\text{C}$  NMR (101 MHz,  $\text{D}_2\text{O}$ )  $\delta$  174.6, 150.4, 136.1, 131.2, 128.9, 128.2, 46.2, 37.6, 20.0.

**A4-B6: [TBD][Ani]**

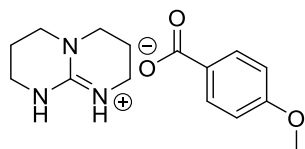

$^1\text{H}$  NMR (400 MHz,  $\text{D}_2\text{O}$ )  $\delta$  7.80 (d,  $J = 8.8$  Hz, 2H), 6.85 (d,  $J = 8.8$  Hz, 2H), 3.70 (s, 3H), 3.00 (dd,  $J = 11.8, 5.8$  Hz, 8H), 1.75 - 1.65 (m, 4H).  $^{13}\text{C}$  NMR (101 MHz,  $\text{D}_2\text{O}$ )  $\delta$  174.2, 161.2, 150.4, 131.0, 128.9, 113.2, 55.3, 46.2, 37.7, 37.6, 20.0.

**A4-B7: [TBD][Gly]**

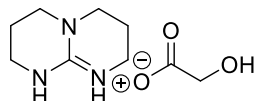

$^1\text{H}$  NMR (400 MHz,  $\text{D}_2\text{O}$ )  $\delta$  3.90 (s, 2H), 3.30 (t,  $J = 4.0$  Hz, 4H), 3.22 (t,  $J = 4.0$  Hz, 4H), 2.00 - 1.86 (m, 4H).  $^{13}\text{C}$  NMR (101 MHz,  $\text{D}_2\text{O}$ )  $\delta$  178.1, 150.9, 60.3, 46.4, 37.8, 20.2.

**A4-B8: [TBD][Lac]**

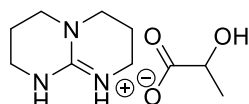

$^1\text{H}$  NMR (400 MHz,  $\text{D}_2\text{O}$ )  $\delta$  4.04 (q,  $J = 8.0$  Hz, 1H), 3.23 (t,  $J = 8.0$  Hz, 4H), 3.16 (t,  $J = 8.0$  Hz, 4H), 1.91 - 1.85 (m, 4H), 1.24 (d,  $J = 4.0$  Hz, 3H).  $^{13}\text{C}$  NMR (101 MHz,  $\text{D}_2\text{O}$ )  $\delta$  181.9, 150.9, 68.2, 46.4, 37.8, 20.2, 20.0.

**A4-B9: [TBD][Cro]**

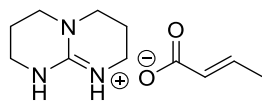

$^1\text{H}$  NMR (400 MHz,  $\text{D}_2\text{O}$ )  $\delta$  6.64 - 6.55 (m, 1H), 5.78 - 5.73 (m, 1H), 3.23 (t, 8.0 Hz, 4H), 3.16 (t, 8.0 Hz, 4H), 1.91 - 1.84 (m, 4H), 1.76 - 1.70 (d,  $J = 8.0$  Hz, 3H).  $^{13}\text{C}$  NMR

(101 MHz, D<sub>2</sub>O)  $\delta$  175.4, 150.9 (s), 141.8, 126.8, 46.4, 37.8, 20.2, 17.0.

**A4-B10: [TBD][TFA]**

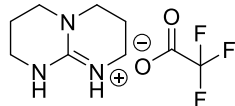

<sup>1</sup>H NMR (400 MHz, D<sub>2</sub>O)  $\delta$  3.24 (t,  $J$  = 8.0 Hz, 4H), 3.17 (t,  $J$  = 8.0 Hz, 4H), 1.92 - 1.86 (m, 4H). <sup>13</sup>C NMR (101 MHz, D<sub>2</sub>O)  $\delta$  162.2 (q,  $J_{C-F}$  = 40.4 Hz), 150.8, 116.2 (q,  $J_{C-F}$  = 292.2 Hz), 46.4, 37.7, 20.1.

**A4-B11: [TBD][H<sub>2</sub>PO<sub>4</sub>]**

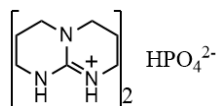

<sup>1</sup>H NMR (400 MHz, D<sub>2</sub>O)  $\delta$  3.22 (t,  $J$  = 8.0 Hz, 4H), 3.15 (t,  $J$  = 4.0 Hz, 4H), 1.90 - 1.84 (m, 4H). <sup>13</sup>C NMR (101 MHz, D<sub>2</sub>O)  $\delta$  150.9, 46.4, 37.8, 20.2.

**A4-B12: [TBD][H<sub>2</sub>PO<sub>4</sub>]**

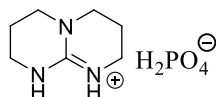

<sup>1</sup>H NMR (400 MHz, D<sub>2</sub>O)  $\delta$  3.23 (t,  $J$  = 8.0 Hz, 8H), 3.16 (t,  $J$  = 8.0 Hz, 8H), 1.91 - 1.85 (m, 8H). <sup>13</sup>C NMR (101 MHz, D<sub>2</sub>O)  $\delta$  151.0, 46.4, 37.8, 20.2.

**A5-B1: [DMAP][Ac]**

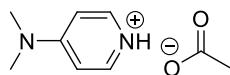

<sup>1</sup>H NMR (400 MHz, D<sub>2</sub>O)  $\delta$  7.88 (d,  $J$  = 8.0 Hz, 2H), 6.74 (d,  $J$  = 8.0 Hz, 2H), 3.07 (s, 6H), 1.79 (s, 3H). <sup>13</sup>C NMR (101 MHz, D<sub>2</sub>O)  $\delta$  181.3, 157.4, 138.4, 106.7, 39.2, 23.2.

**A5-B2: [DMAP][Pro]**

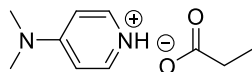

<sup>1</sup>H NMR (400 MHz, D<sub>2</sub>O)  $\delta$  7.84 (d,  $J$  = 8.0 Hz, 2H), 6.66 (d,  $J$  = 8.0 Hz, 2H), 3.00 (s,

6H), 2.01 (q,  $J = 8.0$  Hz, 2H), 0.89 (t,  $J = 8.0$  Hz, 3H).  $^{13}\text{C}$  NMR (101 MHz,  $\text{D}_2\text{O}$ )  $\delta$  184.6, 157.1, 138.8, 106, 39.1, 30.7, 10.1.

#### A5-B3: [DMAP][But]

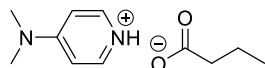

$^1\text{H}$  NMR (400 MHz,  $\text{D}_2\text{O}$ )  $\delta$  7.85 (d,  $J = 8.0$  Hz, 2H), 6.70 (d,  $J = 8.0$  Hz, 2H), 3.03 (s, 6H), 1.98 (t,  $J = 8.0$  Hz, 2H), 1.43 - 1.34 (m, 2H), 0.72 (t,  $J = 8.0$  Hz, 3H).  $^{13}\text{C}$  NMR (101 MHz,  $\text{D}_2\text{O}$ )  $\delta$  183.8, 157.3, 138.2, 106.7, 39.6, 39.2, 19.3, 13.2.

#### A5-B4: [DMAP][Val]

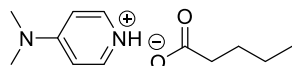

$^1\text{H}$  NMR (400 MHz,  $\text{D}_2\text{O}$ )  $\delta$  7.84 (d,  $J = 7.0$  Hz, 2H), 6.63 (d,  $J = 7.0$  Hz, 2H), 2.97 (s, 6H), 1.97 (t,  $J = 7.6$  Hz, 2H), 1.36 - 1.27 (m, 2H), 1.13 - 1.03 (m, 2H), 0.67 (t,  $J = 7.4$  Hz, 3H).  $^{13}\text{C}$  NMR (101 MHz,  $\text{D}_2\text{O}$ )  $\delta$  174.8, 161.1, 157.0, 138.8, 130.9, 128.8, 113.2, 106.6, 55.3, 39.1.

#### A5-B5: [DMAP][Ben]

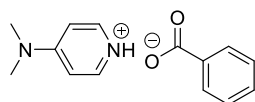

$^1\text{H}$  NMR (400 MHz, )  $\delta$  7.56 (d,  $J = 8.0$  Hz, 2H), 7.50 - 7.48 (m, 2H), 7.18 - 7.14 (m, 1H), 7.10 - 7.06 (m, 2H), 6.37 (d,  $J = 8.0$  Hz, 2H), 2.76 (s, 6H).  $^{13}\text{C}$  NMR (101 MHz,  $\text{D}_2\text{O}$ )  $\delta$  175.0, 157.2, 137.9, 135.8, 131.2, 128.8, 128.2, 106.6, 39.1.

#### A5-B6: [DMAP][Ani]

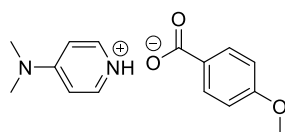

$^1\text{H}$  NMR (400 MHz,  $\text{D}_2\text{O}$ )  $\delta$  7.64 (s, 2H), 7.58 (d,  $J = 8.8$  Hz, 2H), 6.60 (d,  $J = 8.8$  Hz, 2H), 6.33 (d,  $J = 5.6$  Hz, 2H), 3.56 (s, 3H), 2.77 (s, 6H).  $^{13}\text{C}$  NMR (101 MHz,  $\text{D}_2\text{O}$ )  $\delta$

174.8, 161.1, 157.0, 138.8, 130.9, 128.8, 113.2, 106.6, 55.3, 39.1.

**A5-B7: [DMAP][Gly]**

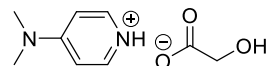

$^1\text{H}$  NMR (400 MHz,  $\text{D}_2\text{O}$ )  $\delta$  7.91 (d,  $J = 8.0$  Hz, 2H), 6.78 (d,  $J = 8.0$  Hz, 2H), 3.84 (s, 2H), 3.11 (s, 6H).  $^{13}\text{C}$  NMR (101 MHz,  $\text{D}_2\text{O}$ )  $\delta$  179.8, 157.5, 138.1, 106.7, 61.2, 39.3.

**A5-B8: [DMAP][Lac]**

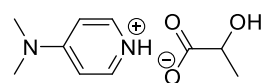

$^1\text{H}$  NMR (400 MHz,  $\text{D}_2\text{O}$ )  $\delta$  7.90 (d,  $J = 6.8$  Hz, 2H), 6.76 (d,  $J = 7.0$  Hz, 2H), 4.04 (dd,  $J = 6.8, 0.6$  Hz, 1H), 3.09 (d,  $J = 0.8$  Hz, 6H), 1.23 (dd,  $J = 6.9, 0.7$  Hz, 3H).  $^{13}\text{C}$  NMR (151 MHz,  $\text{D}_2\text{O}$ )  $\delta$  181.8, 157.5, 138.1, 106.7, 68.2, 39.3, 20.0.

**A5-B9: [DMAP][Cro]**

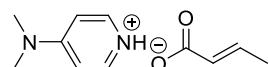

$^1\text{H}$  NMR (400 MHz,  $\text{D}_2\text{O}$ )  $\delta$  7.80 (d,  $J = 7.6$  Hz, 2H), 6.59 (d,  $J = 7.6$  Hz, 2H), 6.43 (dd,  $J = 15.6, 6.8$  Hz, 1H), 5.61 (dd,  $J = 15.6, 1.6$  Hz, 1H), 2.95 (s, 6H), 1.58 (dd,  $J = 6.8, 1.6$  Hz, 3H).  $^{13}\text{C}$  NMR (101 MHz,  $\text{D}_2\text{O}$ )  $\delta$  175.1, 157.4, 142.2, 138.1, 126.4, 106.7, 39.3, 17.0.

**A5-B10: [DMAP][TFA]**

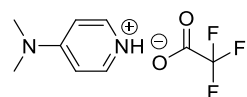

$^1\text{H}$  NMR (400 MHz,  $\text{D}_2\text{O}$ )  $\delta$  7.82 (d,  $J = 8.0$  Hz, 2H), 6.62 (d,  $J = 8.0$  Hz, 2H), 2.97 (d,  $J = 4.0$  Hz, 6H).  $^{13}\text{C}$  NMR (151 MHz,  $\text{D}_2\text{O}$ )  $\delta$  162.7 (q,  $J_{\text{C-F}} = 40.4$  Hz), 157.0, 139.1, 116.4 (q,  $J_{\text{C-F}} = 292.9$  Hz), 106.6, 39.1.

**A5-B11: [DMAP][HPO<sub>4</sub><sup>2-</sup>]**

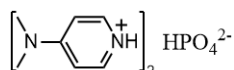

$^1\text{H}$  NMR (400 MHz,  $\text{D}_2\text{O}$ )  $\delta$  7.85 (s, 2H), 6.70 (s, 2H), 3.03 (s, 6H).  $^{13}\text{C}$  NMR (151 MHz,  $\text{D}_2\text{O}$ )  $\delta$  157.4, 138.1, 106.7, 39.2.

**A5-B12: [DMAP][HPO<sub>4</sub><sup>-</sup>]**

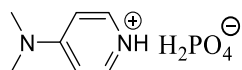

$^1\text{H}$  NMR (400 MHz,  $\text{D}_2\text{O}$ )  $\delta$  7.84 (d,  $J = 8.0$  Hz, 4H), 6.66 (d,  $J = 8.0$  Hz, 4H), 3.00 (s, 12H).  $^{13}\text{C}$  NMR (151 MHz,  $\text{D}_2\text{O}$ )  $\delta$  157.3, 138.3, 106.6, 39.2.

**A6-B1: [2-AnPy][Ac]**

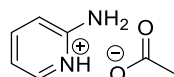

$^1\text{H}$  NMR (400 MHz,  $\text{D}_2\text{O}$ )  $\delta$  7.69 - 7.65 (m, 1H), 7.60 (d,  $J = 8.0$  Hz, 1H), 6.75 (dt,  $J = 12.0, 4.0$  Hz, 1H), 6.71 - 6.67 (m, 1H), 1.78 (s, 3H).  $^{13}\text{C}$  NMR (151 MHz,  $\text{D}_2\text{O}$ )  $\delta$  181.1, 154.2, 143.6, 136.1, 112.9, 23.1.

**A6-B2: [2-AnPy][Pro]**

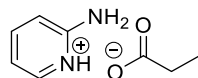

$^1\text{H}$  NMR (400 MHz,  $\text{D}_2\text{O}$ )  $\delta$  7.67 - 7.60 (m, 2H), 6.74 (d,  $J = 12.0$  Hz, 1H), 6.68 (t,  $J = 8.0$  Hz, 1H), 2.02 (q,  $J = 8.0$  Hz, 2H), 0.88 (t,  $J = 8.0$  Hz, 3H).  $^{13}\text{C}$  NMR (151 MHz,  $\text{D}_2\text{O}$ )  $\delta$  184.7, 154.6, 143.3, 137.0, 113.1, 112.8, 30.5, 10.0.

**A6-B3: [2-AnPy][But]**

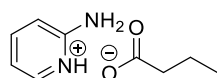

$^1\text{H}$  NMR (400 MHz,  $\text{D}_2\text{O}$ )  $\delta$  7.65 - 7.61 (m, 1H), 7.56 (d,  $J = 8.0$  Hz, 1H), 6.72 (d,  $J = 8.0$  Hz, 1H), 6.65 (t,  $J = 8.0$  Hz, 1H), 1.96 (t,  $J = 8.0$  Hz, 2H), 1.39 - 1.30 (m, 2H), 0.67 (t,  $J = 8.0$  Hz, 3H).  $^{13}\text{C}$  NMR (101 MHz,  $\text{D}_2\text{O}$ )  $\delta$  183.7, 154.2, 143.7, 136.0, 113.0, 39.3, 19.2, 13.1.

**A6-B4: [2-AnPy][Val]**

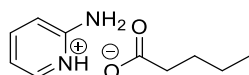

$^1\text{H}$  NMR (400 MHz,  $\text{D}_2\text{O}$ )  $\delta$  7.65 - 7.48 (m, 2H), 6.72 - 6.58 (m, 2H), 1.96 (t,  $J = 7.5$  Hz, 2H), 1.32 - 1.22 (m, 2H), 1.09 - 0.98 (m, 2H), 0.61 (t,  $J = 7.4$  Hz, 3H).  $^{13}\text{C}$  NMR (101 MHz,  $\text{D}_2\text{O}$ )  $\delta$  183.5, 153.9, 144.1, 135.3, 113.3, 112.8, 36.8, 27.8, 21.9, 13.1.

#### A6-B5: [2-AnPy][Ben]

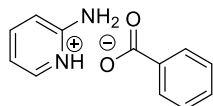

$^1\text{H}$  NMR (400 MHz, DMSO)  $\delta$  8.01 (d,  $J = 4.0$  Hz, 2H), 7.93 (d,  $J = 4.4$  Hz, 1H), 7.62 (dt,  $J = 8.6, 1.2$  Hz, 1H), 7.51 (t,  $J = 7.6$  Hz, 2H), 7.46 - 7.37 (m, 1H), 6.52 (dd,  $J = 10.3, 3.9$  Hz, 2H).  $^{13}\text{C}$  NMR (101 MHz, DMSO)  $\delta$  168.5, 159.9, 147.3, 137.8, 133.0, 132.0, 129.7, 128.9, 112.2, 108.8.

#### A6-B6: [2-AnPy][Ani]

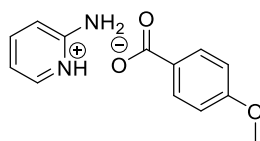

$^1\text{H}$  NMR (400 MHz,  $\text{CDCl}_3$ )  $\delta$  8.06 (d,  $J = 8.8$  Hz, 2H), 7.90 (d,  $J = 4.8$  Hz, 1H), 7.51 - 7.41 (m, 1H), 6.91 (d,  $J = 7.4$  Hz, 2H), 6.64 - 6.57 (m, 1H), 6.55 (d,  $J = 8.5$  Hz, 1H), 3.84 (dd,  $J = 4.0, 2.6$  Hz, 3H).  $^{13}\text{C}$  NMR (101 MHz,  $\text{CDCl}_3$ )  $\delta$  172.1, 162.8, 157.8, 142.7, 139.9, 131.7, 125.5, 113.4, 112.6, 110.8, 77.4, 77.1, 76.8, 55.4.

#### A6-B7: [2-AnPy][Gly]

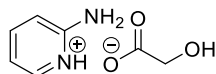

$^1\text{H}$  NMR (400 MHz,  $\text{D}_2\text{O}$ )  $\delta$  7.54 - 7.43 (m, 2H), 6.63 - 6.49 (m, 2H), 3.70 (s, 2H).  $^{13}\text{C}$  NMR (101 MHz,  $\text{D}_2\text{O}$ )  $\delta$  179.7, 153.8, 144.2, 135.0, 113.4, 112.8, 61.1.

#### A6-B8: [2-AnPy][Lac]

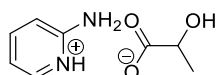

$^1\text{H}$  NMR (400 MHz,  $\text{D}_2\text{O}$ )  $\delta$  7.68 - 7.53 (m, 2H), 6.76 - 6.63 (m, 2H), 3.98 (q,  $J = 6.8$  Hz, 1H), 1.15 (d,  $J = 7.0$  Hz, 3H).  $^{13}\text{C}$  NMR (101 MHz,  $\text{D}_2\text{O}$ )  $\delta$  181.8, 153.7, 144.3, 134.8, 113.5, 112.8, 68.1, 19.9.

**A6-B9: [2-AnPy][Cro]**

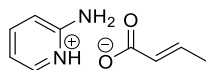

$^1\text{H}$  NMR (400 MHz,  $\text{D}_2\text{O}$ )  $\delta$  7.77 - 7.56 (m, 2H), 6.85 - 6.68 (m, 2H), 6.53 (dq,  $J = 13.6$ , 6.8 Hz, 1H), 5.68 (d,  $J = 15.6$  Hz, 1H), 1.65 (d,  $J = 6.8$  Hz, 3H).  $^{13}\text{C}$  NMR (101 MHz,  $\text{D}_2\text{O}$ )  $\delta$  174.9, 153.8, 143.9, 141.7, 135.1, 126.6, 113.2, 112.6, 16.9.

**A6-B10: [2-AnPy][TFA]**

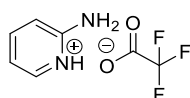

$^1\text{H}$  NMR (400 MHz,  $\text{D}_2\text{O}$ )  $\delta$  7.82 - 7.78 (m, 1H), 7.67 (d,  $J = 8.0$  Hz, 1H), 6.89 (d,  $J = 12.0$  Hz, 1H), 6.79 (t,  $J = 8.0$  Hz, 1H).  $^{13}\text{C}$  NMR (101 MHz,  $\text{D}_2\text{O}$ )  $\delta$  162.9 (q,  $J_{\text{C-F}} = 40.4$  Hz), 153.7, 144.5, 134.8, 116.4 (q,  $J_{\text{C-F}} = 292.9$  Hz), 113.6, 112.8.

**A6-B11: [2-AnPy][HPO<sub>4</sub>]**

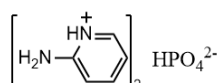

$^1\text{H}$  NMR (400 MHz,  $\text{D}_2\text{O}$ )  $\delta$  7.70 (t,  $J = 8.0$  Hz, 1H), 7.59 (d,  $J = 8.0$  Hz, 1H), 6.79 (d,  $J = 8.0$  Hz, 1H), 6.70 (t,  $J = 8.0$  Hz, 1H).  $^{13}\text{C}$  NMR (101 MHz,  $\text{D}_2\text{O}$ )  $\delta$  153.6, 144.3, 134.8, 113.5, 112.7.

**A6-B12: [2-AnPy][H<sub>2</sub>PO<sub>4</sub>]**

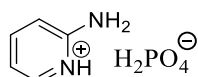

$^1\text{H}$  NMR (400 MHz,  $\text{D}_2\text{O}$ )  $\delta$  7.61 (dd,  $J = 14.2$ , 6.3 Hz, 4H), 6.67 (dd,  $J = 21.4$ , 15.0 Hz, 4H).  $^{13}\text{C}$  NMR (101 MHz,  $\text{D}_2\text{O}$ )  $\delta$  154.4, 143.3, 136.6, 112.9, 112.8.



## Characterization of synthesized 1,2,3-triazolyl phosphonates compounds

### Dimethyl(5-methyl-1-(3-(trifluoromethyl)phenyl)-1H-1,2,3-triazol-4-yl)phosphonate (3a)

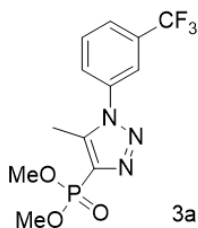

$^1\text{H}$  NMR (400 MHz,  $\text{CDCl}_3$ )  $\delta$  7.86 (d,  $J = 8.0$  Hz, 1H), 7.80 - 7.76 (m, 2H), 7.71 (d,  $J = 8.0$  Hz, 1H), 3.92 (d,  $J = 12.0$  Hz, 6H), 2.61 (d,  $J = 4.0$  Hz, 3H).  $^{13}\text{C}$  NMR (151 MHz,  $\text{CDCl}_3$ )  $\delta$  141.5 (d,  $J_{\text{C-F}} = 23.2$  Hz), 135.9, 134.9, 134.1 (d,  $J_{\text{C-P}} = 160.6$  Hz), 132.5 (t,  $J_{\text{C-F}} = 23.2$  Hz), 128.5, 126.8, 123.1 (q,  $J_{\text{C-F}} = 181.8$  Hz), 122.3, 53.5 (d,  $J = 4.04$  Hz), 9.6.  $^{31}\text{P}$  NMR (243 MHz,  $\text{CDCl}_3$ )  $\delta$  9.57. HRMS for  $\text{C}_{12}\text{H}_{13}\text{F}_3\text{N}_3\text{NaO}_3\text{P}^+$ : calcd.  $[\text{M}+\text{Na}]^+$  : 358.0539, found: 358.0538.

### Dimethyl (1-(4-fluorophenyl)-5-methyl-1H-1,2,3-triazol-4-yl)phosphonate (3b)

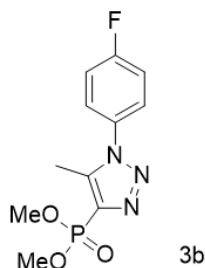

$^1\text{H}$  NMR (400 MHz,  $\text{CDCl}_3$ )  $\delta$  7.46 (q,  $J = 4.0$  Hz, 2H), 7.28 (t,  $J = 8.0$  Hz, 2H), 3.91 (d,  $J = 8.0$  Hz, 6H), 2.55 (d,  $J = 4.0$  Hz, 3H).  $^{13}\text{C}$  NMR (151 MHz,  $\text{CDCl}_3$ )  $\delta$  163.3 (d,  $J_{\text{C-F}} = 169.7$  Hz), 141.6 (d,  $J_{\text{C-F}} = 169.7$  Hz), 133.7 (d,  $J_{\text{C-P}} = 159.6$  Hz), 131.5, 127.3 (d,  $J = 7.1$  Hz), 116.8 (d,  $J = 15.2$  Hz), 53.4 (d,  $J = 4.0$  Hz), 9.6.  $^{31}\text{P}$  NMR (243 MHz,  $\text{CDCl}_3$ )  $\delta$  9.95. HRMS for  $\text{C}_{11}\text{H}_{13}\text{FN}_3\text{NaO}_3\text{P}^+$ : calcd.  $[\text{M}+\text{Na}]^+$  : 308.0571, found: 308.0570

### Dimethyl (1-(2-fluorophenyl)-5-methyl-1H-1,2,3-triazol-4-yl)phosphonate (3c)

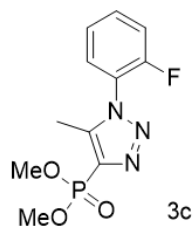

$^1\text{H}$  NMR (400 MHz,  $\text{CDCl}_3$ )  $\delta$  7.61 (dd,  $J = 12.0, 8.0$  Hz, 1H), 7.51 (t,  $J = 8.0$  Hz, 1H), 7.41 - 7.33 (m, 2H), 3.91 (d,  $J = 12.0$  Hz, 6H), 2.49 (t,  $J = 4.0$  Hz, 3H).  $^{13}\text{C}$  NMR (101 MHz,  $\text{CDCl}_3$ )  $\delta$  156.1 (d,  $J_{\text{C-F}} = 254.5$  Hz), 143.2 (d,  $J_{\text{C-F}} = 35.4$  Hz), 133.4 (d,  $J_{\text{C-P}} = 182.8$  Hz), 132.5 (d,  $J = 7.1$  Hz), 128.6, 125.3 (d,  $J = 4.0$  Hz), 123.2 (d,  $J = 13.1$  Hz), 117.0 (d,  $J = 20.2$  Hz), 53.4, 8.8.  $^{31}\text{P}$  NMR (243 MHz,  $\text{CDCl}_3$ )  $\delta$  9.93. HRMS for  $\text{C}_{11}\text{H}_{14}\text{FN}_3\text{O}_3\text{P}^+$ : calcd.  $[\text{M}+\text{H}]^+$  : 286.0751, found: 286.0751.

#### Dimethyl (1-(3-fluorophenyl)-5-methyl-1H-1,2,3-triazol-4-yl)phosphonate (3d)

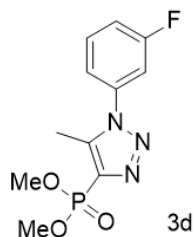

$^1\text{H}$  NMR (400 MHz,  $\text{CDCl}_3$ )  $\delta$  7.50 (td,  $J = 16.0, 8.0$  Hz, 1H), 7.24 - 7.16 (m, 3H), 3.83 (d,  $J = 12.0$  Hz, 6H), 2.51 (d,  $J = 12.0$  Hz, 3H).  $^{13}\text{C}$  NMR (101 MHz,  $\text{CDCl}_3$ )  $\delta$  162.7 (d,  $J_{\text{C-F}} = 250.5$  Hz), 141.5 (d,  $J_{\text{C-F}} = 34.3$  Hz), 136.5 (d,  $J = 10.1$  Hz), 133.8 (d,  $J_{\text{C-P}} = 240.4$  Hz), 131.1 (d,  $J = 9.1$  Hz), 120.9 (d,  $J = 3.0$  Hz), 117.2 (d,  $J = 23.2$  Hz), 113.1 (d,  $J = 25.3$  Hz), 53.5 (d,  $J = 6.1$  Hz), 9.7.  $^{31}\text{P}$  NMR (243 MHz,  $\text{CDCl}_3$ )  $\delta$  9.84. HRMS for  $\text{C}_{11}\text{H}_{14}\text{FN}_3\text{O}_3\text{P}^+$ : calcd.  $[\text{M}+\text{H}]^+$  : 286.0751, found: 286.0752.

#### Dimethyl (1-(2-chlorophenyl)-5-methyl-1H-1,2,3-triazol-4-yl)phosphonate (3e)

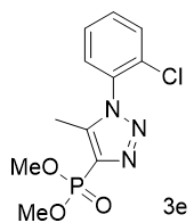

$^1\text{H}$  NMR (400 MHz,  $\text{CDCl}_3$ )  $\delta$  7.64 (d,  $J = 8.0$  Hz, 1H), 7.60 - 7.49 (m, 2H), 7.45 (d,  $J = 8.0$  Hz, 1H), 3.92 (dd,  $J = 12.0, 1.2$  Hz, 6H), 2.43 (s, 3H).  $^{13}\text{C}$  NMR (151 MHz,  $\text{CDCl}_3$ )  $\delta$  143.3 (d,  $J_{C-F} = 23.2$  Hz), 133.6, 133.0, 132.2, 131.7, 130.7, 129.1, 128.1, 53.4, 8.9.  $^{31}\text{P}$  NMR (243 MHz,  $\text{CDCl}_3$ )  $\delta$  10.04. HRMS for  $\text{C}_{11}\text{H}_{13}\text{ClN}_3\text{NaO}_3\text{P}^+$ : calcd.  $[\text{M}+\text{Na}]^+$  : 324.0275, found: 324.0279.

#### Dimethyl (1-(3-chlorophenyl)-5-methyl-1H-1,2,3-triazol-4-yl)phosphonate (3f)

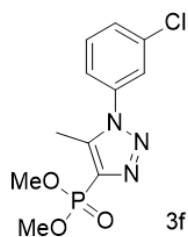

$^1\text{H}$  NMR (600 MHz,  $\text{CDCl}_3$ )  $\delta$  7.56 - 7.52 (m, 3H), 7.38 (d,  $J = 8.0$  Hz, 1H), 3.91 (d,  $J = 4.0$  Hz, 6H), 2.59 (s, 3H).  $^{13}\text{C}$  NMR (151 MHz,  $\text{CDCl}_3$ )  $\delta$  141.5 (d,  $J = 23.2$  Hz), 136.4, 135.5, 133.9 (d,  $J_{C-P} = 160.6$  Hz), 130.8, 130.3, 125.6, 123.4, 53.5 (d,  $J = 4.0$  Hz), 9.7.  $^{31}\text{P}$  NMR (243 MHz,  $\text{CDCl}_3$ )  $\delta$  9.01. HRMS for  $\text{C}_{11}\text{H}_{13}\text{ClN}_3\text{NaO}_3\text{P}^+$ : calcd.  $[\text{M}+\text{Na}]^+$  : 324.0275, found: 324.0279.

#### Dimethyl (1-(4-chlorophenyl)-5-methyl-1H-1,2,3-triazol-4-yl)phosphonate (3g)

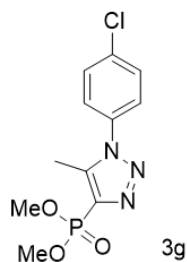

$^1\text{H}$  NMR (600 MHz,  $\text{CDCl}_3$ )  $\delta$  7.49 (d,  $J = 6.0$  Hz, 2H), 7.35 (d,  $J = 6.0$  Hz, 2H), 3.83 (d,  $J = 12.0$  Hz, 6H), 2.49 (s, 3H).  $^{13}\text{C}$  NMR (151 MHz,  $\text{CDCl}_3$ )  $\delta$  141.5 (d,  $J = 23.2$  Hz), 136.3, 133.9, 133.9 (d,  $J_{\text{C-P}} = 159.6$  Hz), 130.0, 126.5, 53.5 (d,  $J = 3.0$  Hz), 9.6.  $^{31}\text{P}$  NMR (243 MHz,  $\text{CDCl}_3$ )  $\delta$  10.07. HRMS for  $\text{C}_{11}\text{H}_{13}\text{ClN}_3\text{NaO}_3\text{P}^+$ : calcd.  $[\text{M}+\text{Na}]^+$ : 324.0275, found: 324.0277.

### Dimethyl (1-(3-bromophenyl)-5-methyl-1H-1,2,3-triazol-4-yl)phosphonate (3h)

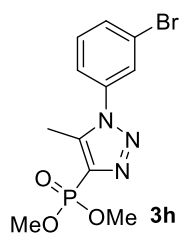

$^1\text{H}$  NMR (400 MHz,  $\text{CDCl}_3$ )  $\delta$  7.72 - 7.67 (m, 2H), 7.50 - 7.42 (m, 2H), 3.90 (d,  $J = 12.0$  Hz, 6H), 2.59 (s, 3H).  $^{13}\text{C}$  NMR (101 MHz,  $\text{CDCl}_3$ )  $\delta$  141.5 (d,  $J = 23.2$  Hz), 136.5, 133.9 (d,  $J_{\text{C-P}} = 159.6$  Hz), 133.2, 131.0, 128.4, 123.8, 123.1, 53.5 (d,  $J = 6.1$  Hz), 9.6.  $^{31}\text{P}$  NMR (243 MHz,  $\text{CDCl}_3$ )  $\delta$  9.74. HRMS for  $\text{C}_{11}\text{H}_{13}\text{BrN}_3\text{NaO}_3\text{P}^+$ : calcd.  $[\text{M}+\text{Na}]^+$ : 367.9770, found: 367.9779.

### Dimethyl(1-(4-bromophenyl)-5-methyl-1H-1,2,3-triazol-4-yl)phosphonate (3i)

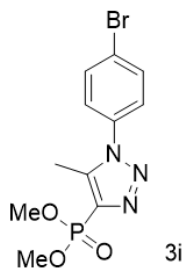

$^1\text{H}$  NMR (400 MHz,  $\text{CDCl}_3$ )  $\delta$  7.73 (d,  $J = 8.0$  Hz, 2H), 7.36 (d,  $J = 16.0$  Hz, 2H), 3.91 (d,  $J = 12.0$  Hz, 6H), 2.57 (s, 3H).  $^{13}\text{C}$  NMR (151 MHz,  $\text{CDCl}_3$ )  $\delta$  141.5 (d,  $J = 23.2$  Hz), 134.4, 133.9 (d,  $J_{\text{C-P}} = 159.6$  Hz), 133.0, 126.7, 124.3, 53.5 (d,  $J = 3.0$  Hz), 9.7.  $^{31}\text{P}$  NMR (243 MHz,  $\text{CDCl}_3$ )  $\delta$  9.81. HRMS for  $\text{C}_{11}\text{H}_{13}\text{BrN}_3\text{NaO}_3\text{P}^+$ : calcd.  $[\text{M}+\text{Na}]^+$ : 367.9770, found: 367.9773.

### Dimethyl (1-(2-iodophenyl)-5-methyl-1H-1,2,3-triazol-4-yl)phosphonate (3j)

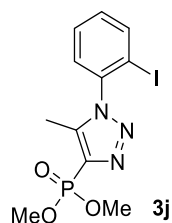

$^1\text{H}$  NMR (400 MHz,  $\text{CDCl}_3$ )  $\delta$  8.03 (dd,  $J = 8.0, 1.2$  Hz, 1H), 7.58 (td,  $J = 8.0, 1.2$  Hz, 1H), 7.39 (dd,  $J = 8.0, 1.6$  Hz, 1H), 7.33 (td,  $J = 8.0, 1.6$  Hz, 1H), 3.91 (d,  $J = 12.0$  Hz, 6H), 2.42 (d,  $J = 1.6$  Hz, 3H).  $^{13}\text{C}$  NMR (151 MHz,  $\text{CDCl}_3$ )  $\delta$  142.8 (d,  $J = 23.2$  Hz), 140.2, 138.2, 133.9 (d,  $J_{\text{C-P}} = 159.6$  Hz), 132.3, 129.6, 128.5, 96.5, 53.5 (d,  $J = 4.0$  Hz), 9.3.  $^{31}\text{P}$  NMR (243 MHz,  $\text{CDCl}_3$ )  $\delta$  10.09. HRMS for  $\text{C}_{11}\text{H}_{13}\text{IN}_3\text{NaO}_3\text{P}^+$ : calcd.  $[\text{M}+\text{Na}]^+$  : 415.9631, found: 415.9640.

#### Dimethyl(5-methyl-1-phenyl-1H-1,2,3-triazol-4-yl)phosphonate (3k)

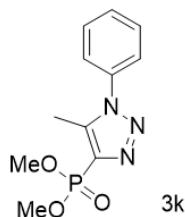

$^1\text{H}$  NMR (400 MHz,  $\text{CDCl}_3$ )  $\delta$  7.53 (dd,  $J = 4.8$  Hz, 5H), 3.91 (d,  $J = 8.0$  Hz, 6H), 2.57 (s, 3H).  $^{13}\text{C}$  NMR (151 MHz,  $\text{CDCl}_3$ )  $\delta$  141.4 (d,  $J = 23.2$  Hz), 135.4, 134.6 (d,  $J_{\text{C-P}} = 159.6$  Hz), 130.1, 129.7, 125.3, 53.4 (d,  $J = 4.0$  Hz), 9.6.  $^{31}\text{P}$  NMR (243 MHz,  $\text{CDCl}_3$ )  $\delta$  10.21. HRMS for  $\text{C}_{11}\text{H}_{14}\text{N}_3\text{NaO}_3\text{P}^+$ : calcd.  $[\text{M}+\text{Na}]^+$  : 290.0665, found: 290.0658.

#### Dimethyl(5-methyl-1-(4-(trifluoromethyl)phenyl)-1H-1,2,3-triazol-4-yl)phosphonate (3l)

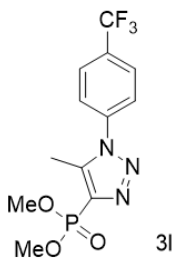

$^1\text{H}$  NMR (400 MHz,  $\text{CDCl}_3$ )  $\delta$  7.85 (d,  $J = 8.0$  Hz, 1H), 7.79 - 7.74 (m, 2H), 7.69 (d,  $J = 8.0$  Hz, 1H), 3.91 (d,  $J = 12.0$  Hz, 6H), 2.61 (s, 3H).  $^{13}\text{C}$  NMR (151 MHz,  $\text{CDCl}_3$ )  $\delta$  141.6 (d,  $J_{\text{C-F}} = 23.2$  Hz), 136.0, 135.0, 133.4, 132.6 (q,  $J_{\text{C-F}} = 22.2$  Hz), 127.2 (q,  $J_{\text{C-F}} = 252.5$  Hz), 122.4, 53.5 (d,  $J = 4.0$  Hz), 9.7.  $^{31}\text{P}$  NMR (162 MHz,  $\text{CDCl}_3$ )  $\delta$  9.56. HRMS for  $\text{C}_{12}\text{H}_{13}\text{F}_3\text{N}_3\text{NaO}_3\text{P}^+$ : calcd.  $[\text{M}+\text{Na}]^+$  : 358.0539, found: 358.0532.

### Dimethyl (5-methyl-1-(4-nitrophenyl)-1H-1,2,3-triazol-4-yl)phosphonate (3m)

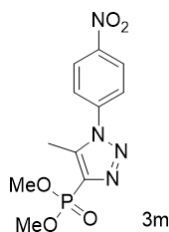

$^1\text{H}$  NMR (400 MHz,  $\text{CDCl}_3$ )  $\delta$  8.48 (d,  $J = 12.0$  Hz, 2H), 7.76 (d,  $J = 8.0$  Hz, 2H), 3.92 (d,  $J = 8.0$  Hz, 6H), 2.67 (d,  $J = 2.4$  Hz, 3H).  $^{13}\text{C}$  NMR (151 MHz,  $\text{CDCl}_3$ )  $\delta$  148.3, 140.3, 135.5, 133.9, 125.8, 125.2, 53.6, 9.9.  $^{31}\text{P}$  NMR (243 MHz,  $\text{CDCl}_3$ )  $\delta$  6.84. HRMS for  $\text{C}_{11}\text{H}_{13}\text{N}_4\text{NaO}_5\text{P}^+$ : calcd.  $[\text{M}+\text{Na}]^+$  : 335.0516, found: 335.0513.

### Dimethyl (5-methyl-1-(3-nitrophenyl)-1H-1,2,3-triazol-4-yl)phosphonate (3n)

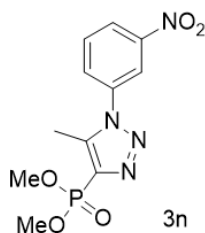

$^1\text{H}$  NMR (400 MHz,  $\text{CDCl}_3$ )  $\delta$  8.47 - 8.41 (m, 2H), 7.90 (d,  $J = 8.0$  Hz, 1H), 7.85 (t,  $J = 8.0$  Hz, 1H), 3.92 (d,  $J = 12.0$  Hz, 6H), 2.66 (d,  $J = 4.0$  Hz, 3H).  $^{13}\text{C}$  NMR (151 MHz,  $\text{CDCl}_3$ )  $\delta$  148.8, 136.4, 131.0, 130.9, 124.7, 120.3, 53.6, 9.7.  $^{31}\text{P}$  NMR (243 MHz,  $\text{CDCl}_3$ )  $\delta$  6.84. HRMS for  $\text{C}_{11}\text{H}_{13}\text{N}_4\text{NaO}_5\text{P}^+$ : calcd.  $[\text{M}+\text{Na}]^+$  : 335.0516, found: 335.0521.

### Butyl 4-(4-(dimethoxyphosphoryl)-5-methyl-1H-1,2,3-triazol-1-yl)benzoate (3o)

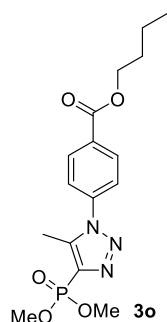

$^1\text{H}$  NMR (400 MHz,  $\text{CDCl}_3$ )  $\delta$  8.26 (d,  $J = 12.0$  Hz, 2H), 7.59 (d,  $J = 8.0$  Hz, 2H), 4.39 (t,  $J = 8.0$  Hz, 2H), 3.91 (d,  $J = 12.0$  Hz, 6H), 2.61 (d,  $J = 4.0$  Hz, 3H), 1.79 (t,  $J = 8.0$  Hz, 2H), 1.53 - 1.50 (m, 2H), 1.00 (t,  $J = 8.0$  Hz, 3H).  $^{13}\text{C}$  NMR (151 MHz,  $\text{CDCl}_3$ )  $\delta$  165.3, 141.5 (d,  $J = 23.2$  Hz), 138.8, 134.1 (d,  $J_{\text{C-P}} = 159.6$  Hz), 132.0, 131.0, 125.0, 65.5, 53.5, 30.7, 19.3, 13.7, 9.8.  $^{31}\text{P}$  NMR (243 MHz,  $\text{CDCl}_3$ )  $\delta$  9.72. HRMS for  $\text{C}_{16}\text{H}_{23}\text{N}_3\text{O}_5\text{P}^+$ : calcd.  $[\text{M}+\text{H}]^+$  : 368.1370, found: 368.1363.

#### Dimethyl (5-methyl-1-(naphthalen-1-yl)-1H-1,2,3-triazol-4-yl)phosphonate (3p)

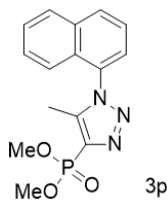

$^1\text{H}$  NMR (400 MHz,  $\text{CDCl}_3$ )  $\delta$  8.09 (d,  $J = 12.0$  Hz, 1H), 8.00 (d,  $J = 8.0$  Hz, 1H), 7.65 - 7.59 (m, 2H), 7.53 (q,  $J = 8.0$  Hz, 2H), 7.13 (d,  $J = 8.0$  Hz, 1H), 3.97 (d,  $J = 8.0$  Hz, 6H), 2.37 (s, 3H).  $^{13}\text{C}$  NMR (151 MHz,  $\text{CDCl}_3$ )  $\delta$  141.6, 141.4, 140.0, 135.3, 134.2, 132.6, 130.8, 129.4, 125.9, 122.3, 53.4, 53.4, 21.3, 9.6.  $^{31}\text{P}$  NMR (243 MHz,  $\text{CDCl}_3$ )  $\delta$  10.30. HRMS for  $\text{C}_{15}\text{H}_{16}\text{N}_3\text{NaO}_3\text{P}^+$ : calcd.  $[\text{M}+\text{Na}]^+$  : 340.0821, found: 340.0824.

#### Dimethyl (5-methyl-1-(p-tolyl)-1H-1,2,3-triazol-4-yl)phosphonate (3q)

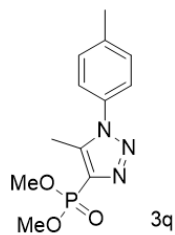

$^1\text{H}$  NMR (400 MHz,  $\text{CDCl}_3$ )  $\delta$  7.35 (dd,  $J = 20.0, 8.0$  Hz, 4H), 3.90 (d,  $J = 12.0$  Hz, 6H), 2.55 - 2.46 (m, 6H).  $^{13}\text{C}$  NMR (151 MHz,  $\text{CDCl}_3$ )  $\delta$  141.5 (d,  $J = 23.2$  Hz), 140.4,

133.3 (d,  $J = 161.6$  Hz), 132.9, 130.2, 125.1, 53.4 (d,  $J = 3.0$  Hz), 21.2, 9.6.  $^{31}\text{P}$  NMR (243 MHz,  $\text{CDCl}_3$ )  $\delta$  10.35. HRMS for  $\text{C}_{12}\text{H}_{16}\text{N}_3\text{NaO}_3\text{P}^+$ : calcd.  $[\text{M}+\text{Na}]^+$  : 304.0821, found: 304.0816.

**Dimethyl (1-(4-methoxyphenyl)-5-methyl-1H-1,2,3-triazol-4-yl)phosphonate (3r)**

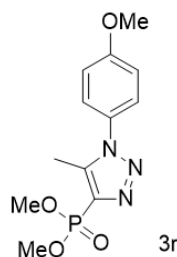

$^1\text{H}$  NMR (400 MHz,  $\text{CDCl}_3$ )  $\delta$  7.36 (d,  $J = 12.0$  Hz, 2H), 7.06 (d,  $J = 8.0$  Hz, 2H), 3.92 (s, 3H), 3.89 (d,  $J = 1.6$  Hz, 6H), 2.52 (s, 3H).  $^{13}\text{C}$  NMR (151 MHz,  $\text{CDCl}_3$ )  $\delta$  160.7, 141.3 (d,  $J = 23.2$  Hz), 132.0, 130.2 (d,  $J_{\text{C-P}} = 159.6$  Hz), 126.7, 114.8, 55.7, 53.4 (d,  $J = 4.0$ ), 9.56.  $^{31}\text{P}$  NMR (243 MHz,  $\text{CDCl}_3$ )  $\delta$  10.37. HRMS for  $\text{C}_{12}\text{H}_{16}\text{N}_3\text{NaO}_4\text{P}^+$ : calcd.  $[\text{M}+\text{Na}]^+$  : 320.0770, found: 320.0765.

**Dimethyl (1-(3-methoxyphenyl)-5-methyl-1H-1,2,3-triazol-4-yl)phosphonate (3s)**

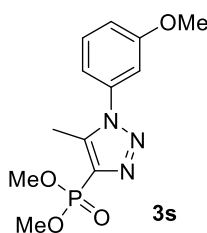

$^1\text{H}$  NMR (400 MHz,  $\text{CDCl}_3$ )  $\delta$  7.47 (t,  $J = 8.0$  Hz, 1H), 7.09 (dd,  $J = 8.5, 2.4$  Hz, 1H), 7.00 (dd,  $J = 7.3, 5.2$  Hz, 2H), 3.92 (s, 3H), 3.89 (s, 3H), 3.87 (s, 3H), 2.57 (d,  $J = 4.0$  Hz, 3H).  $^{13}\text{C}$  NMR (151 MHz,  $\text{CDCl}_3$ )  $\delta$  160.5, 141.5 (d,  $J = 23.2$  Hz), 136.4, 133.2 (d,  $J_{\text{C-P}} = 159.6$  Hz), 130.4, 117.3, 115.9, 111.2, 55.7, 53.5 (d,  $J = 4.1$  Hz), 9.7.  $^{31}\text{P}$  NMR (243 MHz,  $\text{CDCl}_3$ )  $\delta$  10.20. HRMS for  $\text{C}_{12}\text{H}_{16}\text{N}_3\text{NaO}_4\text{P}^+$ : calcd.  $[\text{M}+\text{Na}]^+$  : 320.0771, found: 320.0763.

**Dimethyl (1-(2-methoxyphenyl)-5-methyl-1H-1,2,3-triazol-4-yl)phosphonate (3t)**



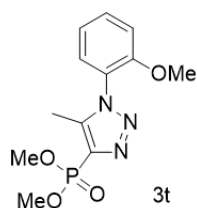

$^1\text{H}$  NMR (400 MHz,  $\text{CDCl}_3$ )  $\delta$  7.56 - 7.53 (m, 1H), 7.35 (dd,  $J = 8.0, 4.0$  Hz, 1H), 7.11 (q,  $J = 4.0$  Hz, 2H), 3.91 (d,  $J = 8.0$  Hz, 6H), 3.81 (s, 3H), 2.40 (d,  $J = 1.6$  Hz, 3H).  $^{13}\text{C}$  NMR (151 MHz,  $\text{CDCl}_3$ )  $\delta$  153.9, 143.6 (d,  $J = 23.2$  Hz), 132.4 (d,  $J_{\text{C-P}} = 161.6$  Hz), 132.1, 128.5, 124.0, 121.1, 112.2, 55.8, 53.4, 8.9.  $^{31}\text{P}$  NMR (243 MHz,  $\text{CDCl}_3$ )  $\delta$  10.76. HRMS for  $\text{C}_{12}\text{H}_{16}\text{N}_3\text{NaO}_4\text{P}^+$ : calcd.  $[\text{M}+\text{Na}]^+$  : 320.0771, found: 320.0765.

### Dimethyl (5-methyl-1-(*m*-tolyl)-1H-1,2,3-triazol-4-yl)phosphonate (**3u**)

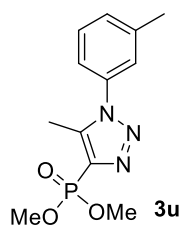

$^1\text{H}$  NMR (400 MHz,  $\text{CDCl}_3$ )  $\delta$  7.45 (t,  $J = 8.0$  Hz, 1H), 7.37 - 7.36 (d,  $J = 4.0$  Hz, 1H), 7.28 (s, 1H), 7.23 - 7.24 (m, 1H), 3.90 (d,  $J = 8.0$  Hz, 6H), 2.55 (d,  $J = 1.2$  Hz, 3H), 2.46 (s, 3H).  $^{13}\text{C}$  NMR (151 MHz,  $\text{CDCl}_3$ )  $\delta$  141.5 (d,  $J = 23.2$  Hz), 140.1, 135.3, 133.4 (d,  $J_{\text{C-P}} = 160.9$  Hz), 130.9, 129.4, 126.0, 122.3, 53.4, 21.3, 9.6.  $^{31}\text{P}$  NMR (162 MHz,  $\text{CDCl}_3$ )  $\delta$  10.32. HRMS for  $\text{C}_{12}\text{H}_{16}\text{N}_3\text{NaO}_3\text{P}^+$ : calcd.  $[\text{M}+\text{Na}]^+$  : 304.0821, found: 304.0811.

### Dimethyl (5-methyl-1-(*o*-tolyl)-1H-1,2,3-triazol-4-yl)phosphonate (**3v**)

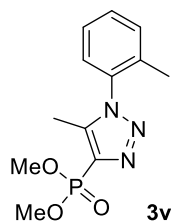

$^1\text{H}$  NMR (400 MHz,  $\text{CDCl}_3$ )  $\delta$  7.49 (t,  $J = 8.0$  Hz, 1H), 7.40 (q,  $J = 8.0$  Hz, 2H), 7.23 (d,  $J = 8.0$  Hz, 1H), 3.92 (d,  $J = 12.0$  Hz, 6H), 2.38 (d,  $J = 1.6$  Hz, 3H), 2.04 (s, 3H).

$^{13}\text{C}$  NMR (151 MHz,  $\text{CDCl}_3$ )  $\delta$  142.3 (d,  $J = 23.2$  Hz), 135.5, 134.2, 132.8 (d,  $J_{\text{C-P}} = 160.6$  Hz), 131.5, 130.8, 127.1, 53.4, 53.4, 17.2, 9.0.  $^{31}\text{P}$  NMR (162 MHz,  $\text{CDCl}_3$ )  $\delta$  10.32. HRMS for  $\text{C}_{12}\text{H}_{16}\text{N}_3\text{NaO}_3\text{P}^+$ : calcd.  $[\text{M}+\text{Na}]^+$  : 304.0821, found: 304.0821.

**Dimethyl(1-(3-chloro-4-methylphenyl)-5-methyl-1H-1,2,3-triazol-4-yl)phosphonate (3w)**

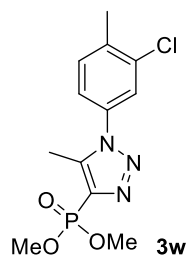

$^1\text{H}$  NMR (400 MHz,  $\text{CDCl}_3$ )  $\delta$  7.50 (d,  $J = 2.0$  Hz, 1H), 7.45 (d,  $J = 8.0$  Hz, 1H), 7.28 (d,  $J = 8.0$  Hz, 1H), 3.90 (d,  $J = 12.0$  Hz, 6H), 2.57 (d,  $J = 1.6$  Hz, 3H), 2.48 (s, 3H).  $^{13}\text{C}$  NMR (151 MHz,  $\text{CDCl}_3$ )  $\delta$  141.5 (d,  $J = 23.2$  Hz), 138.6, 135.3, 134.4 (d,  $J_{\text{C-P}} = 159.6$  Hz), 134.0, 131.7, 125.9, 123.3, 53.4 (d,  $J = 4.0$  Hz), 20.0, 9.6.  $^{31}\text{P}$  NMR (243 MHz,  $\text{CDCl}_3$ )  $\delta$  9.93. HRMS for  $\text{C}_{12}\text{H}_{15}\text{ClN}_3\text{NaO}_3\text{P}^+$ : calcd.  $[\text{M}+\text{Na}]^+$  : 338.0432, found: 338.0435.

**Dimethyl (1-(2,4-dimethylphenyl)-5-methyl-1H-1,2,3-triazol-4-yl)phosphonate (3x)**

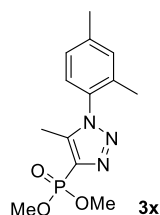

$^1\text{H}$  NMR (400 MHz,  $\text{CDCl}_3$ )  $\delta$  7.18 (s, 1H), 7.05 (s, 2H), 3.90 (d,  $J = 8.0$  Hz, 6H), 2.55 (d,  $J = 4.0$  Hz, 3H), 2.41 (s, 6H).  $^{13}\text{C}$  NMR (151 MHz,  $\text{CDCl}_3$ )  $\delta$  141.5 (d,  $J = 23.2$  Hz), 139.7, 135.2, 133.2 (d,  $J_{\text{C-P}} = 159.6$  Hz), 131.7, 123.0, 53.4 (d,  $J = 4.0$  Hz), 21.2, 18.4, 9.6.  $^{31}\text{P}$  NMR (243 MHz,  $\text{CDCl}_3$ )  $\delta$  10.40. HRMS for  $\text{C}_{13}\text{H}_{19}\text{N}_3\text{O}_3\text{P}^+$ : calcd.  $[\text{M}+\text{H}]^+$  : 296.1158, found: 296.1167.

**Dimethyl (1-(3,5-dimethylphenyl)-5-methyl-1H-1,2,3-triazol-4-yl)phosphonate (3y)**

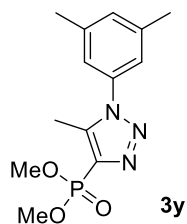

$^1\text{H}$  NMR (400 MHz,  $\text{CDCl}_3$ )  $\delta$  7.18 (s, 1H), 7.05 (s, 2H), 3.90 (d,  $J = 8.0$  Hz, 6H), 2.52 (s, 3H), 2.39 (s, 6H).  $^{13}\text{C}$  NMR (151 MHz,  $\text{CDCl}_3$ )  $\delta$  150.4 (d,  $J = 6.1$  Hz), 139.6 (d,  $J = 3.0$  Hz), 135.6, 131.4 (d,  $J = 9.1$  Hz), 123.2, 111.1 (d,  $J = 122.1$  Hz), 52.2 (d,  $J = 4.0$  Hz), 21.2, 11.02.  $^{31}\text{P}$  NMR (243 MHz,  $\text{CDCl}_3$ )  $\delta$  10.30. HRMS for  $\text{C}_{13}\text{H}_{19}\text{N}_3\text{O}_3\text{P}^+$ : calcd.  $[\text{M}+\text{H}]^+$  : 296.1158, found: 296.1148.

**Dimethyl (1-(2,3-difluorophenyl)-5-methyl-1H-1,2,3-triazol-4-yl)phosphonate (3z)**

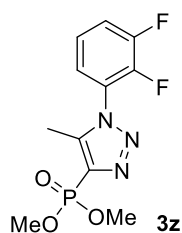

$^1\text{H}$  NMR (600 MHz,  $\text{CDCl}_3$ )  $\delta$  7.35 - 7.29 (m, 2H), 7.18 (t,  $J = 6.0$  Hz, 1H), 3.83 (d,  $J = 12.0$  Hz, 6H), 2.51 (s, 3H).  $^{13}\text{C}$  NMR (151 MHz,  $\text{CDCl}_3$ )  $\delta$  151.3 (d,  $J_{\text{C-F}} = 169.7$  Hz), 150.5 (d,  $J_{\text{C-F}} = 169.7$  Hz), 141.5 (d,  $J_{\text{C-F}} = 24.2$  Hz), 134.0 (d,  $J_{\text{C-F}} = 155.5$  Hz), 131.7, 121.7, 118.4 (d,  $J = 13.1$  Hz), 115.4 (d,  $J = 14.1$  Hz), 53.5, 9.5.  $^{31}\text{P}$  NMR (243 MHz,  $\text{CDCl}_3$ )  $\delta$  9.55. HRMS for  $\text{C}_{11}\text{H}_{12}\text{F}_2\text{N}_3\text{NaO}_3\text{P}^+$ : calcd.  $[\text{M}+\text{Na}]^+$  : 326.0477, found: 326.0477.

**Dimethyl (1-(3,5-difluorophenyl)-5-methyl-1H-1,2,3-triazol-4-yl)phosphonate (3aa)**

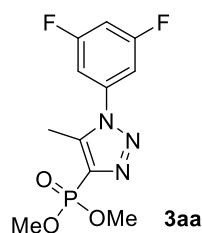

$^1\text{H}$  NMR (600 MHz,  $\text{CDCl}_3$ )  $\delta$  7.03 (d,  $J = 6.0$  Hz, 2H), 6.98 (t,  $J = 12.0$  Hz, 1H), 3.83 (d,  $J = 12.0$  Hz, 6H), 2.55 (s, 3H).  $^{13}\text{C}$  NMR (151 MHz,  $\text{CDCl}_3$ )  $\delta$  163.1 (dd,  $J = 159.6$ , 9.1 Hz), 141.4 (d,  $J = 23.2$  Hz), 137.2, 135.4 (d,  $J_{\text{C-P}} = 161.6$  Hz), 109.0 (q,  $J = 5.1$  Hz), 105.8 (t,  $J = 17.2$  Hz), 53.5 (d,  $J = 4.0$  Hz), 9.7.  $^{31}\text{P}$  NMR (243 MHz,  $\text{CDCl}_3$ )  $\delta$  9.34. HRMS for  $\text{C}_{11}\text{H}_{12}\text{F}_2\text{N}_3\text{NaO}_3\text{P}^+$ : calcd.  $[\text{M}+\text{Na}]^+$ : 326.0477, found: 326.0476.

**Dimethyl (5-methyl-1-(3,4,5-trifluorophenyl)-1H-1,2,3-triazol-4-yl)phosphonate (3ab)**

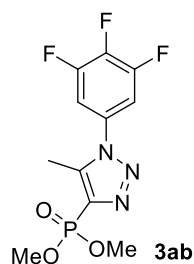

$^1\text{H}$  NMR (400 MHz,  $\text{CDCl}_3$ )  $\delta$  7.17 - 7.14 (m, 2H), 3.83 (d,  $J = 12.0$  Hz, 6H), 2.53 (d,  $J = 1.6$  Hz, 3H).  $^{13}\text{C}$  NMR (151 MHz,  $\text{CDCl}_3$ )  $\delta$  151.5 (dq,  $J_{\text{C-F}} = 255.5$ , 5.1 Hz), 141.5 (d,  $J = 35.6$  Hz), 141.0 (dt,  $J = 258.6$ , 15.6 Hz), 134.4 (d,  $J_{\text{C-P}} = 239.4$  Hz), 130.6 (td,  $J = 10.1$ , 5.0 Hz), 110.5 (d,  $J = 25.6$  Hz), 53.5 (d,  $J = 6.1$  Hz), 9.64.  $^{31}\text{P}$  NMR (243 MHz,  $\text{CDCl}_3$ )  $\delta$  9.17. HRMS for  $\text{C}_{11}\text{H}_{12}\text{F}_3\text{N}_3\text{O}_3\text{P}^+$ : calcd.  $[\text{M}+\text{H}]^+$ : 322.0563, found: 322.0570.

**Diethyl(5-(4-fluorophenyl)-1-(3-(trifluoromethyl)phenyl)-1H-1,2,3-triazol-4-yl)phosphonate (3ac)**

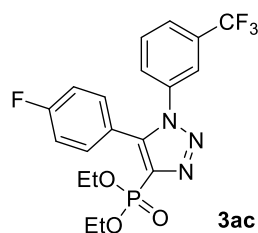

$^1\text{H}$  NMR (400 MHz,  $\text{CDCl}_3$ )  $\delta$  7.71 (d,  $J = 8.0$  Hz, 1H), 7.64 (s, 1H), 7.56 (t,  $J = 8.0$  Hz, 1H), 7.42 (d,  $J = 8.0$  Hz, 1H), 7.36 (q,  $J = 4.0$  Hz, 2H), 7.11 (t,  $J = 8.0$  Hz, 2H), 4.24 - 4.19 (m, 4H), 1.30 (t,  $J = 8.0$  Hz, 6H).  $^{13}\text{C}$  NMR (151 MHz,  $\text{CDCl}_3$ )  $\delta$  163.8 (d,  $J = 168.7$  Hz), 141.9 (d,  $J = 22.2$  Hz), 136.6 (d,  $J_{\text{C-P}} = 160.6$  Hz), 136.2, 132.3 (d,  $J = 6.1$  Hz), 132.2 (q,  $J = 9.1$  Hz), 130.2, 128.2, 127.7 (q,  $J_{\text{C-F}} = 252.5$  Hz), 126.3, 122.2, 121.0 (d,  $J = 4.04$  Hz), 116.1 (d,  $J = 15.2$  Hz), 63.2 (d,  $J = 4.04$  Hz), 16.2 (d,  $J = 4.04$  Hz).  $^{31}\text{P}$  NMR (243 MHz,  $\text{CDCl}_3$ )  $\delta$  6.20. HRMS for  $\text{C}_{19}\text{H}_{18}\text{F}_4\text{N}_3\text{NaO}_3\text{P}^+$ : calcd.  $[\text{M}+\text{Na}]^+$  : 466.0914, found: 466.0920.

**Diethyl(5-(4-bromophenyl)-1-(3-(trifluoromethyl)phenyl)-1H-1,2,3-triazol-4-yl)phosphonate (3ad)**

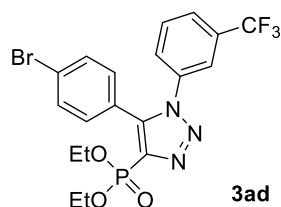

$^1\text{H}$  NMR (400 MHz,  $\text{CDCl}_3$ )  $\delta$  7.73 - 7.68 (m, 2H), 7.57 - 7.53 (m, 3H), 7.38 (d,  $J = 8.0$  Hz, 1H), 7.24 (d,  $J = 8.0$  Hz, 2H), 4.26 - 4.16 (m, 4H), 1.30 (t,  $J = 8.0$  Hz, 6H).  $^{13}\text{C}$  NMR (151 MHz,  $\text{CDCl}_3$ )  $\delta$  141.8 (d,  $J = 20.2$  Hz), 136.8 (d,  $J_{\text{C-P}} = 141.4$  Hz), 135.9, 132.2 (q,  $J_{\text{C-F}} = 9.1$  Hz), 132.1, 131.6, 130.9 (d,  $J = 141.4$  Hz), 130.2, 127.7 (q,  $J_{\text{C-F}} = 252.5$  Hz), 123.0, 124.6 (d,  $J = 111.1$  Hz), 122.4, 122.1, 63.3 (d,  $J = 4.04$  Hz), 16.2 (d,  $J = 4.04$  Hz).  $^{31}\text{P}$  NMR (162 MHz,  $\text{CDCl}_3$ )  $\delta$  6.03. HRMS for  $\text{C}_{19}\text{H}_{18}\text{BrF}_3\text{N}_3\text{NaO}_3\text{P}^+$ : calcd.  $[\text{M}+\text{Na}]^+$  : 526.0113, found: 526.0113.

**Diethyl(5-(p-tolyl)-1-(3-(trifluoromethyl)phenyl)-1H-1,2,3-triazol-4-yl)phosphonate (3ae)**

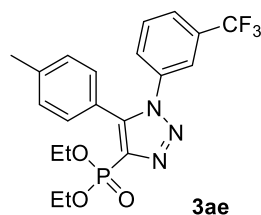

$^1\text{H}$  NMR (400 MHz,  $\text{CDCl}_3$ )  $\delta$  7.69 - 7.66 (m, 2H), 7.52 (t,  $J = 8.0$  Hz, 1H), 7.41 (d,  $J = 12.0$  Hz, 1H), 7.25 - 7.17 (m, 4H), 4.19 (q,  $J = 8.0$  Hz, 4H), 2.38 (s, 3H), 1.28 (t,  $J = 8.0$  Hz, 6H).  $^{13}\text{C}$  NMR (151 MHz,  $\text{CDCl}_3$ )  $\delta$  143.0 (d,  $J = 22.2$  Hz), 140.7, 137.5 (d,  $J = 15.6$  Hz), 135.3 (d,  $J_{\text{C-P}} = 160.6$  Hz), 132.1 (q,  $J_{\text{C-F}} = 22.2$  Hz), 130.8 (d,  $J = 9.1$  Hz), 130.0 (d,  $J = 3.0$  Hz), 129.5, 128.2, 124.1 (d,  $J = 2.0$  Hz), 124.1 (q,  $J_{\text{C-F}} = 181.8$  Hz), 122.2 (d,  $J = 2.0$  Hz), 63.1 (d,  $J = 3.0$  Hz), 29.7, 21.4, 16.2 (d,  $J = 5.1$  Hz).  $^{31}\text{P}$  NMR (243 MHz,  $\text{CDCl}_3$ )  $\delta$  6.63. HRMS for  $\text{C}_{20}\text{H}_{21}\text{F}_3\text{N}_3\text{NaO}_3$   $\text{P}^+$ : calcd.  $[\text{M}+\text{Na}]^+$ : 462.1164, found: 462.1161.

**Diethyl(5-phenyl-1-(3-(trifluoromethyl)phenyl)-1H-1,2,3-triazol-4-yl)phosphonate (3af)**

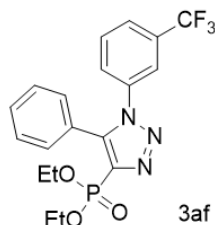

$^1\text{H}$  NMR (400 MHz,  $\text{CDCl}_3$ )  $\delta$  7.68 (d,  $J = 4.0$  Hz, 1H), 7.62 (s, 1H), 7.53 (t,  $J = 8.0$  Hz, 1H), 7.46 - 7.39 (m, 4H), 7.35 (d,  $J = 8.0$  Hz, 2H), 4.19 (q,  $J = 8.0$  Hz, 4H), 1.26 (t,  $J = 8.0$  Hz, 6H).  $^{13}\text{C}$  NMR (151 MHz,  $\text{CDCl}_3$ )  $\delta$  142.8 (d,  $J = 22.0$  Hz), 136.5 (d,  $J_{\text{C-P}} = 160.6$  Hz), 136.3, 132.2, 132.0 (q,  $J_{\text{C-F}} = 23.2$  Hz), 130.4, 130.1, 128.8, 128.1, 126.1 (d,  $J = 2.0$  Hz), 125.1, 122.8 (q,  $J_{\text{C-F}} = 116.2$  Hz), 122.1 (d,  $J = 3.0$  Hz), 63.1 (d,  $J = 4.0$  Hz), 16.1 (d,  $J = 5.0$  Hz).  $^{31}\text{P}$  NMR (243 MHz,  $\text{CDCl}_3$ )  $\delta$  6.46. HRMS for  $\text{C}_{19}\text{H}_{20}\text{F}_3\text{N}_3\text{O}_3\text{P}^+$ : calcd.  $[\text{M}+\text{H}]^+$ : 426.1188, found: 426.1186.

**Diethyl(5-(4-ethylphenyl)-1-(3-(trifluoromethyl)phenyl)-1H-1,2,3-triazol-4-yl)phosphonate (3ag)**

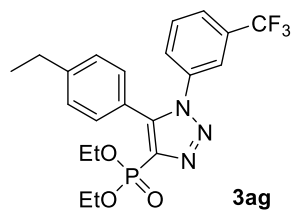

$^1\text{H}$  NMR (400 MHz,  $\text{CDCl}_3$ )  $\delta$  7.60 (d,  $J = 8.0$  Hz, 1H), 7.52 (s, 1H), 7.45 (t,  $J = 8.0$  Hz, 1H), 7.39 (d,  $J = 8.0$  Hz, 1H), 7.17 - 7.14 (m, 4H), 4.17 - 4.07 (m, 4H), 2.60 (q,  $J = 8.0$  Hz, 2H), 1.21 - 1.14 (m, 9H).  $^{13}\text{C}$  NMR (151 MHz,  $\text{CDCl}_3$ )  $\delta$  145.9, 141.0, 135.6 (d,  $J_{\text{C-P}} = 160.6$  Hz), 135.4, 133.9 (q,  $J_{\text{C-F}} = 22.2$  Hz), 131.0 (d,  $J = 19.2$  Hz), 130.9, 128.0, 127.2 (d,  $J = 17.0$  Hz), 124.4 (q,  $J_{\text{C-P}} = 181.8$  Hz), 123.1 (d,  $J = 2.0$  Hz), 121.7, 62.1 (d,  $J = 4.0$  Hz), 30.0, 21.7, 15.1 (d,  $J = 4.0$  Hz), 14.2.  $^{31}\text{P}$  NMR (162 MHz,  $\text{CDCl}_3$ )  $\delta$  6.66. HRMS for  $\text{C}_{21}\text{H}_{24}\text{F}_3\text{N}_3\text{O}_3\text{P}^+$ : calcd.  $[\text{M}+\text{H}]^+$  : 454.1501, found: 454.1491.

**Dimethyl(5-(4-fluorophenyl)-1-(3-(trifluoromethyl)phenyl)-1H-1,2,3-triazol-4-yl)phosphonate (3ah)**

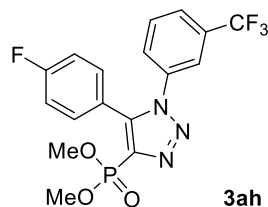

$^1\text{H}$  NMR (400 MHz,  $\text{CDCl}_3$ )  $\delta$  7.72 (d,  $J = 8.0$  Hz, 1H), 7.64 (s, 1H), 7.56 (t,  $J = 8.0$  Hz, 1H), 7.43 (d,  $J = 8.0$  Hz, 1H), 7.36 (dd,  $J = 24.0, 8.0$  Hz, 2H), 7.14 - 7.09 (m, 2H), 3.84 (d,  $J = 12.0$  Hz, 6H).  $^{13}\text{C}$  NMR (151 MHz,  $\text{CDCl}_3$ )  $\delta$  163.8 (d,  $J = 168.7$  Hz), 142.3 (d,  $J = 23.2$  Hz), 136.1, 135.6 (d,  $J_{\text{C-P}} = 159.6$  Hz), 134.8, 132.4, 132.2 (d,  $J = 5.1$  Hz), 130.2, 128.2, 126.4 (q,  $J = 3.0$  Hz), 123.0 (q,  $J_{\text{C-F}} = 181.8$  Hz), 122.3, 120.8 (d,  $J = 2.0$  Hz), 53.6 (d,  $J = 4.0$  Hz).  $^{31}\text{P}$  NMR (162 MHz,  $\text{CDCl}_3$ )  $\delta$  8.82. HRMS for  $\text{C}_{17}\text{H}_{14}\text{F}_4\text{N}_3\text{NaO}_3\text{P}^+$ : calcd.  $[\text{M}+\text{Na}]^+$  : 438.0631, found: 438.0637.

**Dimethyl(5-(p-tolyl)-1-(3-(trifluoromethyl)phenyl)-1H-1,2,3-triazol-4-yl)phosphonate (3ai)**

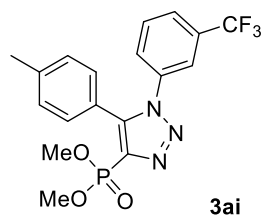

$^1\text{H}$  NMR (400 MHz,  $\text{CDCl}_3$ )  $\delta$  7.70 - 7.65 (m, 2H), 7.53 (t,  $J = 8.0$  Hz, 1H), 7.43 (d,  $J = 8.0$  Hz, 1H), 7.28 - 7.19 (m, 4H), 3.82 (d,  $J = 8.0$  Hz, 6H), 2.38 (s, 3H).  $^{13}\text{C}$  NMR (151 MHz,  $\text{CDCl}_3$ )  $\delta$  143.4 (d,  $J = 23.2$  Hz), 140.8, 136.4, 135.3 (d,  $J_{\text{C-P}} = 160.6$  Hz), 132.2 (q,  $J_{\text{C-F}} = 22.2$  Hz), 130.0, 129.9, 129.6, 128.2, 126.2 (d,  $J = 2.0$  Hz), 123.1 (q,  $J_{\text{C-F}} = 181.8$  Hz), 122.2 (d,  $J = 2.0$  Hz), 121.7, 53.6 (d,  $J = 4.0$  Hz), 21.4.  $^{31}\text{P}$  NMR (162 MHz,  $\text{CDCl}_3$ )  $\delta$  9.29. HRMS for  $\text{C}_{18}\text{H}_{17}\text{F}_3\text{N}_3\text{NaO}_3\text{P}^+$ : calcd.  $[\text{M}+\text{Na}]^+$ : 434.0851, found: 434.0851.

**Dimethyl(5-phenyl-1-(3-(trifluoromethyl)phenyl)-1H-1,2,3-triazol-4-yl)phosphonate (3aj)**

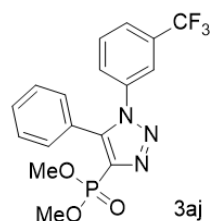

$^1\text{H}$  NMR (400 MHz,  $\text{CDCl}_3$ )  $\delta$  7.69 (d,  $J = 8.0$  Hz, 1H), 7.62 (s, 1H), 7.53 (t,  $J = 8.0$  Hz, 1H), 7.47 - 7.45 (m, 4H), 7.39 (m, 1H), 7.35 (d,  $J = 8.0$  Hz, 1H), 3.82 (d,  $J = 12.0$  Hz, 6H).  $^{13}\text{C}$  NMR (151 MHz,  $\text{CDCl}_3$ )  $\delta$  143.4 (d,  $J = 23.2$  Hz), 140.8, 136.4, 135.3 (d,  $J_{\text{C-P}} = 160.6$  Hz), 132.2 (q,  $J_{\text{C-F}} = 22.2$  Hz), 130.0, 129.9, 129.6, 128.2, 126.2 (q,  $J = 2.0$  Hz), 123.1 (q,  $J_{\text{C-F}} = 181.8$  Hz), 122.2 (d,  $J = 2.0$  Hz), 121.7, 53.6 (d,  $J = 4.0$  Hz).  $^{31}\text{P}$  NMR (162 MHz,  $\text{CDCl}_3$ )  $\delta$  9.09. HRMS for  $\text{C}_{17}\text{H}_{15}\text{F}_3\text{N}_3\text{NaO}_3\text{P}^+$ : calcd.  $[\text{M}+\text{Na}]^+$ : 420.0695, found: 420.0695.

**Dimethyl(1-(4-bromophenyl)-5-(4-fluorophenyl)-1H-1,2,3-triazol-4-yl)phosphonate (3ak)**



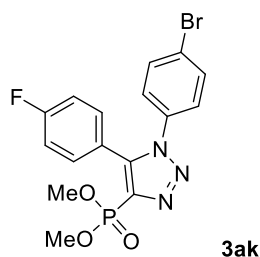

$^1\text{H}$  NMR (400 MHz,  $\text{CDCl}_3$ )  $\delta$  7.56 (d,  $J = 8.0$  Hz, 2H), 7.35 (q,  $J = 8.0$  Hz, 2H), 7.16 (d,  $J = 8.0$  Hz, 2H), 7.11 (t,  $J = 8.0$  Hz, 2H), 3.83 (d,  $J = 12.0$  Hz, 6H).  $^{13}\text{C}$  NMR (151 MHz,  $\text{CDCl}_3$ )  $\delta$  163.7 (d,  $J_{\text{C-F}} = 168.7$  Hz), 142.0 (d,  $J = 22.2$  Hz), 135.4 (d,  $J_{\text{C-P}} = 161.6$  Hz), 134.6, 132.8, 132.2, 132.2, 126.6, 123.9, 116.1 (d,  $J = 15.2$  Hz), 53.6 (d,  $J = 4.0$  Hz).  $^{31}\text{P}$  NMR (162 MHz,  $\text{CDCl}_3$ )  $\delta$  9.11. HRMS for  $\text{C}_{16}\text{H}_{14}\text{BrFN}_3\text{NaO}_3\text{P}^+$ : calcd.  $[\text{M}+\text{Na}]^+$  : 447.9832, found: 447.9840.

**Dimethyl (5-(4-fluorophenyl)-1-(p-tolyl)-1H-1,2,3-triazol-4-yl)phosphonate (3al)**

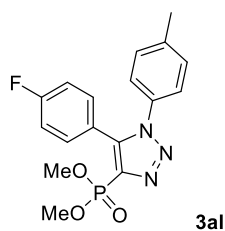

$^1\text{H}$  NMR (400 MHz,  $\text{CDCl}_3$ )  $\delta$  7.35 (q,  $J = 4.0$  Hz, 2H), 7.21 (d,  $J = 8.0$  Hz, 2H), 7.15 (d,  $J = 8.0$  Hz, 2H), 7.07 (t,  $J = 8.0$  Hz, 2H), 3.83 (d,  $J = 12.0$  Hz, 6H), 2.39 (s, 3H).  $^{13}\text{C}$  NMR (151 MHz,  $\text{CDCl}_3$ )  $\delta$  163.6 (d,  $J_{\text{C-F}} = 167.7$  Hz), 142.1 (d,  $J = 20.2$  Hz), 140.0, 132.7 (d,  $J_{\text{C-P}} = 87.8$  Hz), 132.2, 132.1, 130.1, 125.1, 121.4, 115.9 (d,  $J = 14.2$  Hz), 53.6, 21.2.  $^{31}\text{P}$  NMR (162 MHz,  $\text{CDCl}_3$ )  $\delta$  9.64. HRMS for  $\text{C}_{17}\text{H}_{17}\text{FN}_3\text{NaO}_3\text{P}^+$ : calcd.  $[\text{M}+\text{Na}]^+$  : 384.0883, found: 384.0883.

**Dimethyl(1-(3-chlorophenyl)-5-(4-fluorophenyl)-1H-1,2,3-triazol-4-yl)phosphonate (3am)**

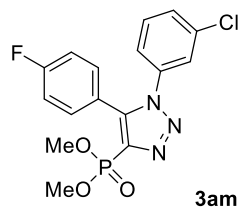

$^1\text{H}$  NMR (600 MHz,  $\text{CDCl}_3$ )  $\delta$  7.36 (d,  $J = 12.0$  Hz, 2H), 7.30 - 7.25 (m, 3H), 7.03 (dd,  $J = 18.0, 6.0$  Hz, 3H), 3.76 (d,  $J = 12.0$  Hz, 6H).  $^{13}\text{C}$  NMR (151 MHz,  $\text{CDCl}_3$ )  $\delta$  163.8 (d,  $J_{\text{C-F}} = 168.7$  Hz), 136.3 (d,  $J = 22.2$  Hz), 136.4 (d,  $J = 37.4$  Hz), 135.0 (d,  $J_{\text{C-P}} = 78.8$  Hz), 135.0, 132.2, (d,  $J = 6.06$  Hz), 130.6, 130.4, 125.6, 123.3, 120.9 (d,  $J_{\text{C-F}} = 2.0$  Hz), 116.1 (d,  $J = 15.6$  Hz), 53.6 (d,  $J = 4.0$  Hz).  $^{31}\text{P}$  NMR (243 MHz,  $\text{CDCl}_3$ )  $\delta$  9.06. HRMS for  $\text{C}_{16}\text{H}_{14}\text{ClFN}_3\text{NaO}_3\text{P}^+$ : calcd.  $[\text{M}+\text{Na}]^+$  : 404.0337, found: 404.0331.

**Dimethyl(1-(3-fluorophenyl)-5-(4-fluorophenyl)-1H-1,2,3-triazol-4-yl)phosphonate (3an)**

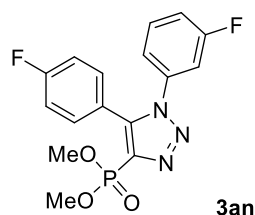

$^1\text{H}$  NMR (400 MHz,  $\text{CDCl}_3$ )  $\delta$  7.45 - 7.32 (m, 5H), 7.11 (t,  $J = 8.0$  Hz, 3H), 3.84 (d,  $J = 12.0$  Hz, 6H).  $^{13}\text{C}$  NMR (151 MHz,  $\text{CDCl}_3$ )  $\delta$  163.7 (d,  $J_{\text{C-F}} = 168.7$  Hz), 142.2 (d,  $J = 22.2$  Hz), 136.5, 135.3 (d,  $J_{\text{C-P}} = 160.6$  Hz), 135.3, 132.2, 130.5, 130.2 (d,  $J = 50.5$  Hz), 125.6, 123.3, 120.9 (d,  $J = 2.0$  Hz), 116.1 (d,  $J = 15.2$  Hz), 53.6 (d,  $J = 4.0$  Hz).  $^{31}\text{P}$  NMR (162 MHz,  $\text{CDCl}_3$ )  $\delta$  9.27. HRMS for  $\text{C}_{16}\text{H}_{14}\text{F}_2\text{N}_3\text{NaO}_3\text{P}^+$ : calcd.  $[\text{M}+\text{Na}]^+$  : 388.0633, found: 388.0633.

**Dimethyl(5-(4-fluorophenyl)-1-(2-iodophenyl)-1H-1,2,3-triazol-4-yl)phosphonate(3ao)**

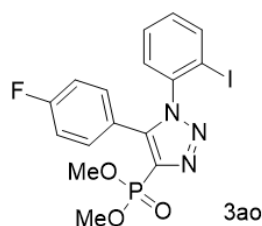

$^1\text{H}$  NMR (400 MHz,  $\text{CDCl}_3$ )  $\delta$  7.92 (d,  $J = 8.0$  Hz, 1H), 7.46 (t,  $J = 8.0$  Hz, 1H), 7.39 (t,  $J = 8.0$  Hz, 2H), 7.31 (d,  $J = 8.0$  Hz, 1H), 7.22 (t,  $J = 8.0$  Hz, 1H), 7.02 (t,  $J = 8.0$  Hz, 2H), 3.86 (d,  $J = 12.0$  Hz, 6H).  $^{13}\text{C}$  NMR (151 MHz,  $\text{CDCl}_3$ )  $\delta$  163.6 (d,  $J_{\text{C-F}} = 168.7$  Hz), 143.4 (d,  $J = 22.2$  Hz), 140.2, 138.4, 135.3 (d,  $J_{\text{C-P}} = 160.6$  Hz), 132.2 (d,  $J = 21.2$  Hz), 129.1 (d,  $J = 21.2$  Hz), 121.8, 120.7 (d,  $J = 2.0$  Hz), 115.7 (d,  $J = 15.6$  Hz), 100.4, 96.7, 53.6 (d,  $J = 4.0$  Hz).  $^{31}\text{P}$  NMR (243 MHz,  $\text{CDCl}_3$ )  $\delta$  9.06. HRMS for  $\text{C}_{16}\text{H}_{14}\text{FIN}_3\text{NaO}_3\text{P}^+$ : calcd.  $[\text{M}+\text{Na}]^+$ : 495.9693, found: 495.9693.

**Dimethyl(1-(3,5-difluorophenyl)-5-(4-fluorophenyl)-1H-1,2,3-triazol-4-yl)phosphonate (3ap)**

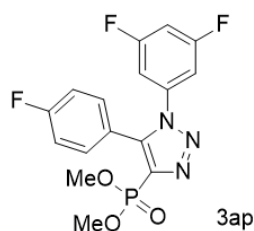

$^1\text{H}$  NMR (400 MHz,  $\text{CDCl}_3$ )  $\delta$  7.38 (t,  $J = 4.0$  Hz, 2H), 7.15 (t,  $J = 4.0$  Hz, 2H), 6.93 (t,  $J = 8.0$  Hz, 1H), 6.87 (d,  $J = 4.0$  Hz, 2H), 3.83 (d,  $J = 8.0$  Hz, 6H).  $^{13}\text{C}$  NMR (151 MHz,  $\text{CDCl}_3$ )  $\delta$  163.9 (d,  $J_{\text{C-F}} = 161.6$  Hz), 162.9 (d,  $J = 151.5$  Hz), 142.2 (d,  $J = 22.2$  Hz), 136.6, 136.2 (d,  $J_{\text{C-P}} = 233.3$  Hz), 132.1 (d,  $J = 6.1$  Hz), 120.6 (d,  $J = 3.0$  Hz), 116.4 (d,  $J = 15.6$  Hz), 109.0 (d,  $J = 15.2$  Hz), 105.5 (d,  $J = 33.3$  Hz), 53.6 (d,  $J = 4.0$  Hz).  $^{31}\text{P}$  NMR (162 MHz,  $\text{CDCl}_3$ )  $\delta$  8.64. HRMS for  $\text{C}_{16}\text{H}_{13}\text{F}_3\text{N}_3\text{NaO}_3\text{P}^+$ : calcd.  $[\text{M}+\text{Na}]^+$ : 406.0538, found: 406.0528.

**Dimethyl(5-(4-fluorophenyl)-1-(3,4,5-trifluorophenyl)-1H-1,2,3-triazol-4-yl)phosphonate (3aq)**

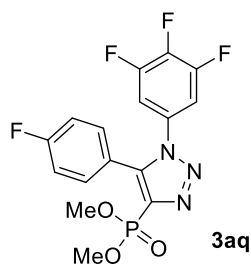

$^1\text{H}$  NMR (400 MHz,  $\text{CDCl}_3$ )  $\delta$  7.38 (q,  $J = 4.0$  Hz, 2H), 7.16 (t,  $J = 8.0$  Hz, 2H), 7.00 (t,  $J = 8.0$  Hz, 2H), 3.83 (d,  $J = 12.0$  Hz, 6H).  $^{13}\text{C}$  NMR (151 MHz,  $\text{CDCl}_3$ )  $\delta$  164.0 (d,  $J_{\text{C-F}} = 169.7$  Hz), 152.1, 150.3, 142.4, 142.4, 135.9 (d,  $J_{\text{C-P}} = 163.6$  Hz), 132.1 (d,  $J = 6.1$  Hz), 120.4 (d,  $J = 2.0$  Hz), 116.5 (d,  $J = 15.2$  Hz), 110.4 (d,  $J = 17.2$  Hz), 53.6 (d,  $J = 4.0$  Hz).  $^{31}\text{P}$  NMR (162 MHz,  $\text{CDCl}_3$ )  $\delta$  8.45. HRMS for  $\text{C}_{16}\text{H}_{12}\text{F}_4\text{N}_3\text{NaO}_3\text{P}^+$ : calcd.  $[\text{M}+\text{Na}]^+$  : 424.0446, found: 424.0439.

**Dimethyl(1-(3-chloro-4-methylphenyl)-5-(4-fluorophenyl)-1H-1,2,3-triazol-4-yl)phosphonate (3ar)**

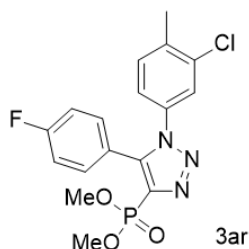

$^1\text{H}$  NMR (400 MHz,  $\text{CDCl}_3$ )  $\delta$  7.39 - 7.35 (m, 3H), 7.24 (d,  $J = 8.0$  Hz, 1H), 7.10 (t,  $J = 8.0$  Hz, 2H), 6.98 (d,  $J = 12.0$  Hz, 1H), 3.83 (d,  $J = 8.0$  Hz, 6H), 2.41 (s, 3H).  $^{13}\text{C}$  NMR (151 MHz,  $\text{CDCl}_3$ )  $\delta$  163.7 (d,  $J_{\text{C-F}} = 168.7$  Hz), 142.3, 138.2, 135.2 (d,  $J_{\text{C-P}} = 159.6$  Hz), 135.2, 134.2, 132.2 (d,  $J = 6.1$  Hz), 131.5, 125.8, 123.2, 121.0 (d,  $J = 2.0$  Hz), 116.1 (d,  $J = 15.6$  Hz), 53.6 (d,  $J = 4.0$  Hz), 19.9.  $^{31}\text{P}$  NMR (162 MHz,  $\text{CDCl}_3$ )  $\delta$  9.21. HRMS for  $\text{C}_{17}\text{H}_{16}\text{ClFN}_3\text{NaO}_3\text{P}^+$ : calcd.  $[\text{M}+\text{Na}]^+$  : 418.0494, found: 418.0493.

**Table S3** GC/MS data of compound A1-B1 to A1-B26.<sup>a</sup>

| Code   | Chemical structure | RT (min) | MW     | Results of MS                                                                                 |
|--------|--------------------|----------|--------|-----------------------------------------------------------------------------------------------|
| A1-B1  |                    | 9.4      | 297.2  | 297.2(M), 296.2(M-1), 269.3(M-28), 254.2, 222.1, 160.2, 159.2, 134.2, 109.1, 77.1             |
| A1-B2  |                    | 9.5      | 346.1  | 346.1(M), 345.2(M-1), 318.2(M-28), 210.0, 209.1, 208.1, 157.0, 155.0, 109.1, 93.0, 76.1, 75.0 |
| A1-B3  |                    | 9.4      | 346.1  | 346.1(M), 345.2(M-1), 318.2(M-28), 224.1, 210.1, 209.1, 208.1, 157.0, 155.0, 154.0            |
| A1-B4  |                    | 8.1      | 285.2  | 285.2(M), 284.7(M-1), 283.9, 257.2(M-28), 162.1, 148.1, 147.2, 147.1, 122.1, 106.1, 105.1     |
| A1-B5  |                    | 10.4     | 312.2  | 312.2(M), 311.2(M-1), 310.6, 284.3(M-28), 273.1, 175.1, 162.1, 135.1, 110.1, 109.1, 93.1      |
| A1-B6  |                    | 10.0     | 312.2  | 312.2(M), 311.1(M-1), 284.2(M-28), 175.1, 174.1, 173.1, 162.1, 135.1, 130.1, 129.1            |
| A1-B7  |                    | 8.7      | 301.7  | 301.6(M), 300.1(M-1), 299.8, 273.3(M-28), 178.1, 164.1, 163.1, 162.1, 110.1, 93.1             |
| A1-B8  |                    | 12.6     | 367.3  | 367.3(M), 366.1(M-1), 365.5, 339.4(M-28), 238.1, 230.2, 188.1, 174.1, 93.1, 86.5              |
| A1-B9  |                    | 7.8      | 335.22 | 335.3(M), 334.3(M-1), 333.3, 307.3(M-28), 212.2, 199.1, 198.1, 197.1, 196.1, 145.1            |
| A1-B10 |                    | 8.3      | 267.2  | 267.2(M), 266.1(M-1), 264.8, 239.5(M-28), 207.1, 185.1, 144.2, 131.1, 130.1                   |
| A1-B11 |                    | 8.7      | 281.3  | 281.2(M), 280.2(M-1), 280.1, 253.2(M-28), 158.2, 145.2, 144.2, 143.2, 142.1, 118.1            |
| A1-B12 |                    | 9.6      | 393.1  | 393.1(M), 365.0(M-28), 220.2, 205.2, 177.2, 145.2, 105.0, 91.2, 80.9, 57.1                    |
| A1-B13 |                    | 8.7      | 315.7  | 315.6(M), 314.2(M-1), 313.9, 287.2(M-28), 180.1, 179.1, 178.1, 177.1, 125.1, 123.1            |

|        |                                                                                     |     |       |                                                                                          |
|--------|-------------------------------------------------------------------------------------|-----|-------|------------------------------------------------------------------------------------------|
| A1-B14 | 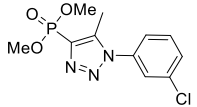   | 8.9 | 301.7 | 301.6(M), 300.3(M-1), 300.1, 273.3(M-28), 166.1, 165.1, 164.1, 135.1, 111.1, 106.1       |
| A1-B15 |    | 8.0 | 335.2 | 335.2(M), 334.2(M-1), 307.2(M-28), 333.5, 212.1, 199.1, 198.1, 197.1, 93.0               |
| A1-B16 |    | 8.0 | 285.2 | 285.2(M), 284.6(M-1), 284.1, 257.1(M-28), 162.1, 148.1, 147.1, 135.1, 122.1, 95.1        |
| A1-B17 |    | 8.0 | 285.2 | 285.2(M), 284.2(M-1), 283.4, 254.9(M-28), 162.1, 148.1, 147.1, 135.1, 110.1, 109.1, 95.1 |
| A1-B18 |    | 7.7 | 321.2 | 321.2(M), 293.1(M-28), 198.1, 184.1, 162.1, 157.1, 135.1, 131.1                          |
| A1-B19 |    | 7.7 | 303.2 | 303.2(M), 302.1(M-1), 275.1(M-28), 180.1, 167.1, 166.1, 135.1, 113.1                     |
| A1-B20 |  | 9.0 | 295.3 | 295.2(M), 294.2(M-1), 267.1(M-28), 266.2, 172.2, 158.2, 157.2, 105.1                     |
| A1-B21 |  | 8.6 | 281.3 | 281.2(M), 280.1(M-1), 253.2(M-28), 255.3, 158.1, 145.2, 144.2, 143.2, 91.1, 65.1         |
| A1-B22 |  | 8.6 | 281.3 | 281.1(M), 280.1(M-1), 253.3(M-28), 220.1, 158.2, 157.2, 156.1, 132.1, 77.1               |
| A1-B23 |  | 8.6 | 295.3 | 295.2(M), 294.1(M-1), 267.3(M-28), 281.9, 220.1, 158.2, 157.2, 156.1, 132.1, 77.1        |
| A1-B24 |  | 9.0 | 301.7 | 301.6(M), 300.2(M-1), 273.2(M-28), 299.9, 272.1, 178.1, 166.1, 165.1, 164.1, 111.1       |
| A1-B25 |  | 9.2 | 297.3 | 297.2(M), 296.2(M-1), 269.2(M-28), 295.8, 268.1, 254.1, 161.1, 160.1, 158.1, 77.1        |
| A1-B26 |  | 8.6 | 297.3 | 297.0(M), 296.2(M-1), 269.2(M-28), 252.1, 158.2, 144.1, 143.1, 93.1, 91.1, 65.1          |

<sup>a</sup> The purity of the triazolyl phosphonate compounds were > 96%.

**Table S4** GC/MS data of compound A2-B1 to A2-B26.<sup>a</sup>

| Code   | Chemical structure | RT (min) | MW    | Results of MS                                                                                   |
|--------|--------------------|----------|-------|-------------------------------------------------------------------------------------------------|
| A2-B1  |                    | 9.9      | 325.3 | 325.1(M), 324.2(M-1), 297.2(M-28), 161.2, 160.1, 159.2, 159.1, 134.1, 92.1                      |
| A2-B2  |                    | 10.0     | 374.2 | 374.1(M), 373.1(M-1), 346.1(M-28), 272.0, 210.1, 209.1, 208.1, 157.0, 136.1                     |
| A2-B3  |                    | 9.8      | 374.2 | 374.1(M), 373.2(M-1), 346.2(M-28), 211.1, 210.1, 209.1, 208.1, 196.0, 157.0                     |
| A2-B4  |                    | 8.4      | 313.3 | 313.2(M), 312.5(M-1), 285.1(M-28), 312.0, 149.1, 148.1, 147.1, 136.1, 122.1, 95.1               |
| A2-B5  |                    | 10.9     | 340.3 | 340.1(M), 339.1(M-1), 312.3(M-28), 256.1, 239.1, 176.1, 175.1, 136.1, 129.1                     |
| A2-B6  |                    | 10.6     | 340.3 | 340.1(M), 339.1(M-1), 312.3(M-28), 266.1, 176.1, 175.1, 163.1, 136.1, 76.1                      |
| A2-B7  |                    | 9.0      | 329.7 | 329.1(M), 328.1(M-1), 301.6(M-28), 166.1, 165.1, 164.1, 152.1, 121.1, 111.1, 75.1               |
| A2-B8  |                    | 13.7     | 395.4 | 395.4(M), 394.1(M-1), 367.3(M-28), 381.3, 231.2, 230.2, 174.1, 136.1, 121.1                     |
| A2-B9  |                    | 8.1      | 363.3 | 363.0(M), 362.2(M-1), 335(M-28), 260.1, 199.1, 198.1, 186.1, 145.1, 136.1                       |
| A2-B10 |                    | 8.6      | 295.3 | 295.2(M), 294.5(M-1), 267.2(M-28), 293.9, 131.1, 130.1, 118.1, 77.1                             |
| A2-B11 |                    | 9.1      | 308.3 | 308.2(M), 307.4(M-1), 280.1(M-28), 208.2, 145.2, 144.1, 143.2, 118.1, 91.1, 65.1                |
| A2-B12 |                    | 10.1     | 421.2 | 421.1(M), 420.4(M-1), 393.2(M-28), 419.3, 473.1, 399.0, 256.0, 200.1, 172.1, 109.1, 107.1, 76.1 |
| A2-B13 |                    | 9.9      | 343.8 | 343.7(M), 342.5(M-1), 315.0(M-28), 181.1, 180.1, 179.1, 178.1, 166.1, 125.1, 89.1               |

|        |                                                                                     |      |       |                                                                                    |
|--------|-------------------------------------------------------------------------------------|------|-------|------------------------------------------------------------------------------------|
| A2-B14 | 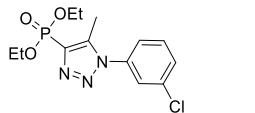   | 9.2  | 329.7 | 329.1(M), 328.4(M-1), 301.3(M-28), 326.0, 301.1, 281.1, 207.1, 165.1, 164.1        |
| A2-B15 |    | 8.2  | 363.3 | 363.0(M), 362.7(M-1), 335.6(M-28), 361.9, 279.1, 199.1, 198.1, 186.1, 145.1, 121.1 |
| A2-B16 |    | 8.4  | 313.3 | 313.2(M), 312.5(M-1), 285.2(M-28), 299.1, 149.1, 148.1, 147.1, 136.1, 121.1, 95.1  |
| A2-B17 |    | 8.3  | 313.3 | 313.2(M), 312.6(M-1), 285.3(M-28), 312.1, 229.1, 149.1, 148.1, 136.1, 121.1, 95.1  |
| A2-B18 |    | 8.0  | 349.3 | 349.2(M), 348.1(M-1), 321.1(M-28), 347.4, 265.1, 85.1, 184.1, 172.1, 131.1         |
| A2-B19 |    | 8.0  | 331.3 | 331.2(M), 330.6(M-1), 303.2(M-28), 329.7, 247.1, 167.1, 154.1, 121.1, 113.1        |
| A2-B20 |  | 9.4  | 323.3 | 323.3(M), 322.2(M-1), 295.3(M-28), 159.2, 158.2, 105.1, 77.1,                      |
| A2-B21 |  | 9.0  | 309.3 | 309.3(M), 308.4(M-1), 281.3(M-28), 307.5, 145.1, 144.1, 143.1, 91.1, 66.1, 65.1,   |
| A2-B22 |  | 8.5  | 309.3 | 309.3(M), 308.7(M-1), 281.4(M-28), 308.2, 145.2, 144.2, 142.3, 142.2, 91.1         |
| A2-B23 |  | 15.9 | 323.3 | 323.5(M), 322.7(M-1), 295.3(M-28), 295.3, 158.2, 156.2, 144.1, 132.3, 121.2, 103.1 |
| A2-B24 |  | 9.4  | 329.7 | 329.1(M), 328.1(M-1), 301.3(M-28), 165.1, 164.1, 163.1, 136.1, 111.1, 92.1, 75.7   |
| A2-B25 |  | 9.6  | 325.3 | 325.1(M), 324.2(M-1), 297.2(M-28), 161.1, 160.1, 134.1, 107.1, 92.1, 77.1          |
| A2-B26 |  | 9.6  | 325.3 | 325.3(M), 324.8(M-1), 297.3(M-28), 282.1, 160.1, 146.1, 134.1, 120.1, 92.1, 77.1   |

<sup>a</sup> The purity of the triazolyl phosphonate compounds were > 96%.



**Table S5** GC/MS data of compound A3-B1 to A3-B26.<sup>a</sup>

| Code  | Chemical structure                                                                  | RT (min) | MW    | Results of MS                                                                                    |
|-------|-------------------------------------------------------------------------------------|----------|-------|--------------------------------------------------------------------------------------------------|
| A3-B1 | 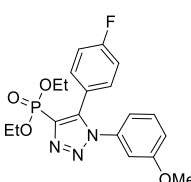   | 12.5     | 405.4 | 405.3(M), 404.3(M-1), 377.2(M-28), 303.1, 200.1, 172.1, 160.2, 134.1, 123.1,                     |
| A3-B2 |    | 12.7     | 454.2 | 454.1(M), 453.4(M-1), 426.1(M-28), 353.0, 208.1, 200.1, 172.1, 107.1, 108.1, 76.1, 65.0          |
| A3-B3 |    | 12.3     | 454.2 | 454.1(M), 453.2(M-1), 426.1(M-28), 353.0, 208.1, 200.1, 172.1, 123.1, 107.1, 76.1                |
| A3-B4 |   | 10.0     | 393.3 | 393.3(M), 392.1(M-1), 365.2(M-28), 291.1, 229.1, 200.1, 172.1, 123.1, 107.1, 95.1                |
| A3-B5 |  | 10.0     | 420.3 | 420.2(M), 419.2(M-1), 392.3(M-28), 317.1, 230.2, 200.1, 172.1, 107.0, 65.0                       |
| A3-B6 |  | 11.1     | 420.3 | 420.2(M), 419.3(M-1), 381.1, 307.1, 245.1, 200.1, 123.1, 107.1, 75.1, 65.1                       |
| A3-B7 |  | 13.7     | 409.8 | 409.7(M), 408.4(M-1), 407.3, 392.2, 318.1, 209.1, 200.1, 172.1, 123.1, 107.1, 76.1               |
| A3-B8 |  | 14.2     | 475.5 | 475.1(M), 474.1(M-1), 447.1(M-28), 392.2, 364.2, 336.1, 318.1, 256.1, 208.1, 200.1, 192.1, 123.1 |
| A3-B9 |  | 9.4      | 443.3 | 443.3(M), 442.1(M-1), 415.2(M-28), 430.4, 415.2, 387.1, 389.1, 279.1, 200.1, 172.1, 123.1, 107.1 |

|        |                                                                                     |      |       |                                                                                    |
|--------|-------------------------------------------------------------------------------------|------|-------|------------------------------------------------------------------------------------|
| A3-B10 | 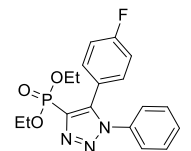   | 10.3 | 375.3 | 375.2(M), 374.1(M-1), 347.1(M-28), 291.1, 273.0, 200.1, 123.1, 107.1, 77.1, 65.0   |
| A3-B11 |    | 11.1 | 389.4 | 389.2(M), 388.9(M-1), 347.4(M-28), 361.2, 305.1, 287.1, 200.1, 172.1, 123.1, 107.1 |
| A3-B12 |    | 13.1 | 501.2 | 501.1(M), 500.1(M-1), 473.1(M-28), 399.0, 256.0, 200.1, 172.1, 107.1, 76.1, 65.0   |
| A3-B13 |    | 12.4 | 423.8 | 423.1(M), 422.0(M-1), 395.2(M-28), 321.1, 200.1, 172.1, 123.1, 107.0               |
| A3-B14 |   | 11.3 | 409.8 | 409.2(M), 408.1(M-1), 381.2(M-28), 381.2, 339.1, 321.1, 207.1, 200.1, 172.1, 107.1 |
| A3-B15 |  | 9.5  | 443.3 | 443.3(M), 442.1(M-1), 415.2(M-28), 341.1, 200.1, 172.1, 123.1, 107.1               |
| A3-B16 |  | 10.0 | 393.3 | 393.1(M), 392.1(M-1), 365.2(M-28), 291.1, 200.1, 172.1, 107.1, 95.1                |
| A3-B17 |  | 9.9  | 393.3 | 393.3(M), 392.1(M-1), 365.2(M-28), 385.2, 309.1, 291.1, 200.1, 172.1, 123.1, 107.1 |
| A3-B18 |  | 9.2  | 429.3 | 429.2(M), 428.0(M-1), 401.5(M-28), 327.1, 265.1, 200.1, 172.1, 107.1, 81.0, 65.0   |

|        |                                                                                     |      |       |                                                                                   |
|--------|-------------------------------------------------------------------------------------|------|-------|-----------------------------------------------------------------------------------|
| A3-B19 | 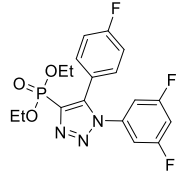   | 9.3  | 411.3 | 411.1(M), 410.1(M-1), 383.2(M-28), 309.1, 247.1, 200.1, 172.1, 107.1              |
| A3-B20 |    | 11.3 | 403.4 | 403.4(M), 402.4(M-1), 375.2(M-28), 301.1, 239.2, 200.1, 172.0, 132.1, 107.1       |
| A3-B21 |    | 10.8 | 389.4 | 389.1(M), 388.1(M-1), 361.2(M-28), 305.1, 287.1, 255.2, 200.1, 172.0, 107.1, 65.1 |
| A3-B22 |    | 10.3 | 389.4 | 389.3(M), 388.2(M-1), 361.2(M-28), 304.1, 222.1, 172.0, 144.1, 123.1, 91.1        |
| A3-B23 |  | 10.9 | 403.4 | 403.0(M), 402.2(M-1), 375.2(M-28), 318.1, 238.2, 200.1, 172.0, 158.2, 123.1       |
| A3-B24 |  | 11.6 | 409.8 | 409.7(M), 408.2(M-1), 381.1(M-28), 307.1, 245.1, 200.1, 172.0, 107.0, 75.1        |
| A3-B25 |  | 11.9 | 405.4 | 405.3(M), 404.2(M-1), 377.2(M-28), 321.1, 303.1, 200.1, 172.1, 107.1, 77.1        |
| A3-B26 |  | 11.3 | 405.4 | 404.3(M-1), 377.2(M-28), 303.1, 225.1, 200.1, 172.1, 160.1, 123.1, 109.1          |

<sup>a</sup> The purity of the triazolyl phosphonate compounds were > 96%.

**Table S6** GC/MS data of compound A4-B1 to A4-B26.<sup>a</sup>

| Code | Chemical structure | RT (min) | MW | Results of MS |
|------|--------------------|----------|----|---------------|
|------|--------------------|----------|----|---------------|

|       |                                                                                     |      |       |                                                                           |
|-------|-------------------------------------------------------------------------------------|------|-------|---------------------------------------------------------------------------|
| A4-B1 | 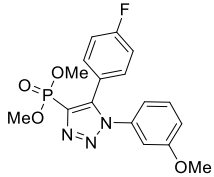   | 11.8 | 377.3 | 377.3(M), 376.1(M-1), 349.2(M-28), 254.2, 171.1, 123.1, 93.1, 63.1        |
| A4-B2 |    | 12.0 | 426.2 | 426.1(M), 425.5(M-1), 398.1(M-28), 397.0, 186.1, 171.1, 107.1, 93.0, 75.1 |
| A4-B3 |    | 11.6 | 426.2 | 426.1(M), 425.6(M-1), 398.1(M-28), 186.1, 171.0, 123.1, 107.1, 93.1       |
| A4-B4 |    | 9.6  | 365.3 | 364.1(M-1), 337.1(M-28), 242.2, 186.1, 171.1, 93.1, 75.1                  |
| A4-B5 |   | 13.3 | 392.3 | 392.1(M), 391.2(M-1), 364.7(M-28), 208.1, 186.1, 171.1, 123.1, 93.1       |
| A4-B6 |  | 12.9 | 392.3 | 392.2(M), 391.3(M-1), 364.1(M-28), 209.1, 186.1, 123.1, 93.1, 76.1        |
| A4-B7 |  | 10.6 | 381.7 | 381.7(M), 380.5(M-1), 353.1(M-28), 186.1, 171.1, 107.1, 93.0, 75.1        |
| A4-B8 |  | 17.6 | 447.4 | 447.4(M), 446.1(M-1), 419.2(M-28), 186.1, 171.0, 123.1, 107.1, 93.0       |
| A4-B9 |  | 9.1  | 415.3 | 415.1(M), 414.1(M-1), 387.1(M-28), 292.1, 186.1, 171.0, 107.1, 93.0       |

|        |                                                                                     |      |       |                                                                                   |
|--------|-------------------------------------------------------------------------------------|------|-------|-----------------------------------------------------------------------------------|
| A4-B10 | 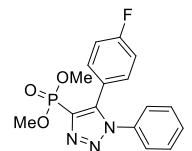   | 9.9  | 347.3 | 347.0(M), 346.9(M-1), 319.1(M-28), 224.2, 186.1, 171.0, 123.1, 107.1              |
| A4-B11 |    | 10.5 | 361.3 | 361.3(M), 360.2(M-1), 333.2 (M-28), 238.2, 186.1, 171.0, 107.1, 93.1              |
| A4-B12 |    | 12.4 | 473.2 | 473.0(M), 472.1(M-1), 445.0(M-28), 243.0, 222.1, 186.1, 123.1, 107.1, 93.1,       |
| A4-B13 |    | 11.7 | 395.8 | 395.7(M), 394.1(M-1), 367.1(M-28), 272.1, 186.1, 171.1, 123.1, 107.1, 93.1, 63.1  |
| A4-B14 |   | 10.8 | 381.7 | 381.7(M), 380.2(M-1), 353.1(M-28), 379.6, 353.1, 258.1, 186.1, 171.0, 107.1, 93.0 |
| A4-B15 |  | 9.2  | 415.3 | 415.2(M), 414.5(M-1), 387.1(M-28), 292.1, 186.1, 171.0, 107.1, 93.0               |
| A4-B16 |  | 9.6  | 365.3 | 365.2(M), 364.1(M-1), 337.1(M-28), 242.2, 186.1, 171.1, 107.1, 93.1               |
| A4-B17 |  | 9.5  | 365.3 | 365.1(M), 364.0(M-1), 337.1(M-28), 338.1, 242.1, 186.1, 171.0, 123.1, 93.0, 75.0  |
| A4-B18 |  | 8.9  | 401.3 | 401.2(M), 400.1(M-1), 373.2(M-28), 278.1, 186.1, 107.1, 93.1, 79.0                |

|        |                                                                                     |      |       |                                                                                    |
|--------|-------------------------------------------------------------------------------------|------|-------|------------------------------------------------------------------------------------|
| A4-B19 | 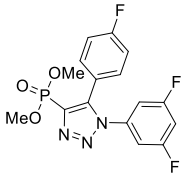   | 8.9  | 383.3 | 383.2(M), 382.2(M-1), 355.1(M-28), 186.1, 171.1, 107.1, 93.1, 79.0                 |
| A4-B20 |    | 10.7 | 375.3 | 375.3(M), 374.1(M-1), 347.5(M-28), 252.2, 186.1, 171.1, 107.1, 77.1                |
| A4-B21 |    | 10.3 | 361.3 | 361.3(M), 360.2(M-1), 333.2(M-28), 238.2, 186.1, 171.0, 107.1, 93.1                |
| A4-B22 |   | 9.8  | 361.3 | 361.2(M), 360.1(M-1), 333.2(M-28), 286.1, 222.1, 171.1, 123.1, 93.1                |
| A4-B23 |  | 9.8  | 375.3 | 375.1(M), 333.2(M-28), 286.1, 222.1, 171.1, 123.1, 93.1, 65.1, 51.3                |
| A4-B24 |  | 10.5 | 381.7 | 381.1(M), 380.1(M-1), 353.1(M-28), 304.1, 303.1, 227.1, 226.1, 183.1, 181.1, 152.4 |
| A4-B25 |  | 11.3 | 377.3 | 377.3(M), 376.1(M-1), 349.2(M-28), 254.2, 186.1, 171.1, 123.1, 92.1                |
| A4-B26 |  | 10.8 | 377.3 | 377.3(M), 376.6(M-1), 349.2(M-28), 287.1, 186.1, 123.1, 107.1, 77.1                |

<sup>a</sup> The purity of the triazolyl phosphonate compounds were > 96%.

**Table S7** GC/MS data of compound A5-B1 to A5-B26.<sup>a</sup>

| Code | Chemical structure | RT (min) | MW | Results of MS |
|------|--------------------|----------|----|---------------|
|------|--------------------|----------|----|---------------|

|        |                                                                                     |      |       |                                                                            |
|--------|-------------------------------------------------------------------------------------|------|-------|----------------------------------------------------------------------------|
| A5-B1  | 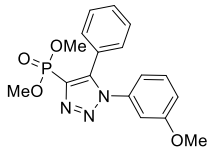   | 12.5 | 359.3 | 359.3(M), 358.2(M-1), 331.2(M-28), 236.2, 168.1, 105.1, 98.1, 77.1         |
| A5-B2  |    | 12.6 | 408.2 | 408.1(M), 407.3(M-1), 380.3(M-28), 380.3, 204.2, 168.1, 105.1, 98.1, 63.1  |
| A5-B3  |    | 12.2 | 408.2 | 408.1(M), 407.2(M-1), 380.3(M-28), 379.1, 204.2, 168.1, 105.1, 98.1, 63.1  |
| A5-B4  |    | 9.9  | 347.3 | 347.3(M), 346.2(M-1), 319.1(M-28), 224.2, 168.1, 105.1, 98.1, 63.1         |
| A5-B5  |    | 14.1 | 374.3 | 374.1(M), 373.1(M-1), 346.1(M-28), 204.1, 168.1, 105.1, 76.1, 63.1         |
| A5-B6  |  | 13.6 | 374.3 | 374.2(M), 373.6(M-1), 346.1(M-28), 191.2, 168.1, 105.1, 76.1, 63.1         |
| A5-B7  |  | 11.1 | 363.7 | 363.7(M), 362.3(M-1), 335.1(M-28), 204.1, 168.1, 105.1, 98.1, 63.0         |
| A5-B8  |  | 19.3 | 429.4 | 429.2(M), 428.2(M-1), 401.2(M-28), 168.1, 130.1, 105.1, 93.1, 89.1,        |
| A5-B9  |  | 9.4  | 397.3 | 397.2(M), 396.5(M-1), 369.1(M-28), 168.1, 153.1, 109.0, 89.1, 63.0         |
| A5-B10 |  | 8.3  | 329.3 | 329.5(M), 328.4(M-1), 301.2(M-28), 206.2, 168.1, 153.1, 105.1, 89.1, 77.1  |
| A5-B11 |  | 11.0 | 343.3 | 343.4(M), 342.0(M-1), 315.2(M-28), 220.2, 168.1, 153.1, 131.1, 105.1, 89.1 |

|        |  |      |       |                                                                                  |
|--------|--|------|-------|----------------------------------------------------------------------------------|
| A5-B12 |  | 13.2 | 455.2 | 455.1(M), 454.2(M-1), 427.1(M-28), 222.1, 204.1, 168.1, 153.1, 105.1, 90.1, 76.1 |
| A5-B13 |  | 12.4 | 377.8 | 377.4(M), 376.1(M-1), 349.1(M-28), 254.1, 168.1, 105.1, 89.1, 63.0               |
| A5-B14 |  | 11.2 | 363.7 | 363.7(M), 362.3(M-1), 335.1(M-28), 240.1, 168.1, 105.1, 89.1, 63.0               |
| A5-B15 |  | 9.4  | 397.3 | 397.2(M), 396.0(M-1), 369.1(M-28), 274.2, 168.1, 105.1, 89.1, 63.1               |
| A5-B16 |  | 10.0 | 347.3 | 347.2(M), 346.2(M-1), 319.1(M-28), 224.1, 168.1, 105.1, 89.1, 63.1               |
| A5-B17 |  | 9.8  | 347.3 | 347.0(M), 346.9(M-1), 319.1(M-28), 224.1, 168.1, 105.1, 89.1, 63.0               |
| A5-B18 |  | 9.1  | 383.3 | 383.2(M), 355.1(M-28), 260.1, 168.1, 109.0, 89.1, 63.1                           |
| A5-B19 |  | 9.2  | 365.3 | 365.2(M), 364.0(M-1), 337.1(M-28), 242.1, 168.1, 93.1, 90.1, 63.1                |
| A5-B20 |  | 11.3 | 357.4 | 357.3(M), 356.2(M-1), 329.2(M-28), 234.2, 168.1, 105.1, 79.1                     |
| A5-B21 |  | 10.8 | 343.3 | 343.3(M), 342.2(M-1), 315.2(M-28), 220.2, 168.1, 105.1, 91.1, 65.1               |
| A5-B22 |  | 9.2  | 343.3 | 343.3(M), 342.2(M-1), 315.9(M-28), 260.2, 205.2, 204.1, 105.1, 91.1, 65.1,       |



|        |                                                                                   |      |       |                                                                     |
|--------|-----------------------------------------------------------------------------------|------|-------|---------------------------------------------------------------------|
| A5-B23 | 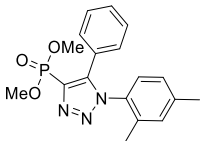 | 10.9 | 357.4 | 357.3(M), 356.4(M-1), 329.2(M-28), 282.1, 218.2, 153.1, 105.1, 93.1 |
| A5-B24 |  | 11.3 | 363.7 | 363.7(M), 362.1(M-1), 335.1(M-28), 240.1, 168.1, 105.1, 89.1, 63.0  |
| A5-B25 |  | 11.9 | 359.3 | 359.3(M), 358.0(M-1), 331.2(M-28), 236.2, 168.1, 105.1, 98.1, 77.1  |
| A5-B26 |  | 11.3 | 359.3 | 359.3(M), 358.2(M-1), 331.2(M-28), 269.1, 220.1, 153.1, 105.1, 77.1 |

<sup>a</sup> The purity of the triazolyl phosphonate compounds were > 96%.

**Table S8** GC/MS data of compound A6-B1 to A6-B26.<sup>a</sup>

| Code   | Chemical structure                                                                  | RT (min) | MW    | Results of MS                                                              |
|--------|-------------------------------------------------------------------------------------|----------|-------|----------------------------------------------------------------------------|
| A6-B1  | 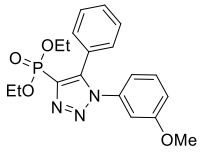   | 13.4     | 387.4 | 387.1(M), 386.2(M-1), 285.1, 359.2(M-28), 182.1, 154.1, 105.1, 89.1        |
| A6-B2  |    | 13.5     | 436.3 | 436.1(M), 435.2(M-1), 408.1(M-28), 208.0, 182.1, 154.1, 105.1, 91.1, 89.1  |
| A6-B3  |    | 13.1     | 436.3 | 436.1(M), 435.4(M-1), 408.1(M-28), 208.0, 182.1, 154.1, 105.1, 89.1, 76.1  |
| A6-B4  |    | 10.4     | 375.3 | 375.3(M), 374.2(M-1), 360.2, 347.2(M-28), 273.1, 211.1, 182.1, 105.1, 89.1 |
| A6-B5  |   | 15.2     | 402.4 | 402.3(M), 401.1(M-1), 388.4, 374.2(M-28), 300.1, 182.1, 154.1, 105.1, 89.1 |
| A6-B6  |  | 14.6     | 402.4 | 402.2(M), 401.0(M-1), 400.9, 374.2(M-28), 300.1, 182.2, 154.1, 105.1, 89.1 |
| A6-B7  |  | 11.7     | 391.8 | 391.7(M), 390.0(M-1), 378.5, 363.1(M-28), 289.1, 182.1, 154.0, 105.1, 89.1 |
| A6-B8  |  | 21.4     | 457.5 | 457.3(M), 456.3(M-1), 429.2(M-28), 230.2, 182.1, 154.1, 89.1, 65.0         |
| A6-B9  |  | 9.5      | 425.4 | 425.2(M), 424.1(M-1), 397.2(M-28), 323.1, 261.1, 182.1, 154.1, 89.1        |
| A6-B10 |  | 10.8     | 357.4 | 357.2(M), 356.2(M-1), 329.2(M-28), 255.1, 182.1, 154.1, 89.1, 77.1         |

|        |  |      |       |                                                                             |
|--------|--|------|-------|-----------------------------------------------------------------------------|
| A6-B11 |  | 11.7 | 371.4 | 371.2(M), 370.1(M-1), 343.2(M-28), 269.1, 182.1, 154.1, 89.1, 65.1          |
| A6-B12 |  | 13.5 | 483.3 | 483.2(M), 482.9(M-1), 455.1(M-28), 381.0, 319.0, 256.0, 230.0, 182.1, 154.1 |
| A6-B13 |  | 13.2 | 405.8 | 405.8(M), 404.5(M-1), 380.3(M-28), 377.1, 303.1, 182.1, 154.1, 105.1, 89.1  |
| A6-B14 |  | 11.9 | 391.8 | 391.7(M), 390.4(M-1), 390.2, 363.1(M-28), 289.1, 182.1, 154.0, 105.1, 89.1  |
| A6-B15 |  | 9.9  | 425.4 | 425.2(M), 424.1(M-1), 397.2(M-28), 323.1, 261.1, 182.1, 164.1, 89.1         |
| A6-B16 |  | 10.5 | 375.3 | 375.2(M), 374.1(M-1), 347.2(M-28), 273.1, 182.1, 154.1, 105.1, 89.1,        |
| A6-B17 |  | 10.3 | 375.3 | 375.2(M), 374.1(M-1), 347.4(M-28), 273.1, 182.1, 154.0, 105.1, 89.1         |
| A6-B18 |  | 9.5  | 411.3 | 411.2(M), 410.1(M-1), 383.1(M-28), 309.0, 182.1, 154.1, 105.1, 89.1         |
| A6-B19 |  | 9.6  | 393.3 | 393.2(M), 392.2(M-1), 365.1(M-28), 291.1, 182.0, 154.1, 105.1, 89.1         |
| A6-B20 |  | 11.9 | 385.4 | 385.2(M), 384.1(M-1), 357.2(M-28), 221.1, 182.1, 154.0, 105.1, 89.1         |
| A6-B21 |  | 11.3 | 371.4 | 371.2(M), 370.1(M-1), 343.2(M-28), 269.0, 182.1, 154.1, 105.1, 89.1         |

|        |                                                                                    |      |       |                                                                           |
|--------|------------------------------------------------------------------------------------|------|-------|---------------------------------------------------------------------------|
| A6-B22 | 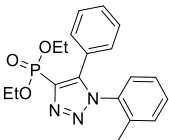  | 10.7 | 371.4 | 371.2(M), 370.2(M-1), 343.2(M-28), 204.1, 182.1, 154.0, 91.1, 89.1        |
| A6-B23 |   | 11.4 | 385.4 | 385.3(M), 384.1(M-1), 357.2(M-28), 282.1, 218.2, 182.1, 157.0, 105.1      |
| A6-B24 |   | 21.2 | 391.8 | 391.5(M), 390.1(M-1), 363.1(M-28), 289.1, 182.1, 154.1, 105.1, 89.1       |
| A6-B25 |   | 12.7 | 387.4 | 387.3(M), 386.1(M-1), 359.2 (M-28), 258.1, 182.1, 154.1, 89.1, 77.1       |
| A6-B26 |  | 11.9 | 387.4 | 387.3(M), 386.0(M-1), 359.2(M-28), 207.1, 182.1, 154.1, 105.0, 77.1, 65.0 |

<sup>a</sup> The purity of the triazolyl phosphonate compounds were > 96%.

**Table S9** GC/MS data of compound A7-B1 to A7-B26.<sup>a</sup>

| Code  | Chemical structure                                                                  | RT (min) | MW    | Results of MS                                                             |
|-------|-------------------------------------------------------------------------------------|----------|-------|---------------------------------------------------------------------------|
| A7-B1 | 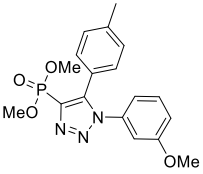   | 13.5     | 373.4 | 373.3(M), 372.2(M-1), 345.2(M-28), 182.1, 119.1, 103.1, 77.1, 63.0        |
| A7-B2 |    | 13.6     | 422.2 | 422.1(M), 421.0(M-1), 394.1(M-28), 393.1, 182.1, 119.1, 103.1, 93.1, 77.1 |
| A7-B3 |    | 13.2     | 422.2 | 422.1(M), 421.4(M-1), 394.1(M-28), 182.1, 119.1, 103.1, 93.0, 77.1        |
| A7-B4 |   | 10.5     | 361.3 | 361.3(M), 360.4(M-1), 333.1(M-28), 238.2, 182.1, 119.1, 93.0, 77.1        |
| A7-B5 |  | 15.3     | 388.3 | 388.3(M), 387.1(M-1), 360.1(M-28), 182.1, 167.1, 119.1, 93.0, 76.1        |
| A7-B6 |  | 14.6     | 388.3 | 388.3(M), 387.0(M-1), 360.1(M-28), 267.1, 182.1, 119.1, 93.0, 76.1        |
| A7-B7 |  | 11.9     | 377.8 | 377.7(M), 376.4(M-1), 349.1(M-28), 182.1, 167.1, 119.1, 103.1, 93.0       |
| A7-B8 |  | 21.5     | 443.4 | 443.3(M), 442.2(M-1), 415.2(M-28), 182.1, 167.0, 119.1, 103.1, 77.1       |
| A7-B9 |  | 9.9      | 411.3 | 411.3(M), 410.5(M-1), 383.2(M-28), 182.1, 167.1, 103.1, 93.0, 77.1        |

|        |                                                                                     |      |       |                                                                                        |
|--------|-------------------------------------------------------------------------------------|------|-------|----------------------------------------------------------------------------------------|
| A7-B10 | 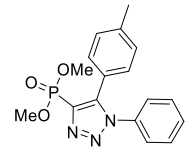   | 10.9 | 343.3 | 343.3(M), 342.0(M-1), 315.2 (M-28), 182.1, 167.1, 103.1, 92.9, 77.1                    |
| A7-B11 |    | 11.8 | 357.4 | 357.3(M), 356.7(M-1), 329.2(M-28), 234.2, 182.1, 119.1, 103.1, 65.1                    |
| A7-B12 |    | 8.9  | 469.2 | 469.1(M), 468.9(M-1), 441.8(M-28), 439.1, 340.3, 284.2207.1, 177.2, 161.2, 149.1, 91.3 |
| A7-B13 |    | 13.3 | 391.8 | 391.6(M), 390.0(M-1), 363.1(M-28), 268.1, 182.1, 119.1, 103.1, 77.1                    |
| A7-B14 |   | 12.0 | 377.8 | 377.1(M), 376.1(M-1), 349.1(M-28), 182.1, 167.0, 119.1, 77.1, 63.0,                    |
| A7-B15 |  | 9.9  | 411.3 | 411.3(M), 410.1(M-1), 383.2(M-28), 182.1, 167.1, 103.1, 93.0, 77.1                     |
| A7-B16 |  | 10.6 | 361.3 | 361.3(M), 360.1(M-1), 333.1(M-28), 182.1, 167.1, 119.1, 93.0, 91.1                     |
| A7-B17 |  | 10.4 | 361.3 | 361.0(M), 360.0(M-1), 333.1(M-28), 238.2, 182.1, 119.1, 103.1, 77.1                    |
| A7-B18 |  | 9.5  | 397.3 | 397.1(M), 396.1(M-1), 369.1(M-28), 182.1, 167.1, 119.1, 103.1, 77.1                    |

|        |                                                                                     |      |       |                                                                                   |
|--------|-------------------------------------------------------------------------------------|------|-------|-----------------------------------------------------------------------------------|
| A7-B19 | 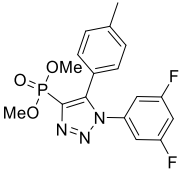   | 9.6  | 379.3 | 379.1(M), 378.1(M-1), 351.1(M-28), 182.1, 167.1, 119.1, 103.1, 77.1               |
| A7-B20 |    | 12.1 | 371.4 | 371.3(M), 370.6(M-1), 343.2(M-28), 248.2, 182.1, 167.1, 119.1, 93.0               |
| A7-B21 |    | 9.1  | 357.4 | 357.3(M), 356.0(M-1), 329.2(M-28), 263.2, 235.2, 234.2, 193.2, 130.1, 103.1, 77.1 |
| A7-B22 |   | 10.9 | 357.4 | 357.3(M), 356.9(M-1), 329.2(M-28), 218.2, 204.1, 167.1, 119.1, 91.1               |
| A7-B23 |  | 8.8  | 371.4 | 371.3(M), 370.3(M-1), 343.0(M-28), 235.2, 220.2, 205.2, 193.2, 130.1, 103.1, 77.1 |
| A7-B24 |  | 12.4 | 377.8 | 377.7(M), 376.6(M-1), 349.1(M-28), 182.1, 119.1, 103.1, 93.0, 77.1                |
| A7-B25 |  | 12.9 | 373.4 | 373.3(M), 372.1(M-1), 345.2(M-28), 250.2, 182.0, 119.1, 93.0, 77.1                |
| A7-B26 |  | 12.1 | 373.3 | 373.3(M), 372.2(M-1), 345.2(M-28), 283.1, 220.1, 167.1, 119.1, 93.1, 77           |

<sup>a</sup> The purity of the triazolyl phosphonate compounds were > 96%.

**Table S10** GC/MS data of compound A8-B1 to A8-B26.<sup>a</sup>

| Code  | Chemical structure                                                                  | RT (min) | MW    | Results of MS                                                                     |
|-------|-------------------------------------------------------------------------------------|----------|-------|-----------------------------------------------------------------------------------|
| A8-B1 | 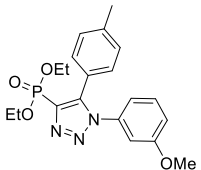   | 14.5     | 401.4 | 401.1(M), 400.5(M-1), 373.2(M-28), 317.1, 237.2, 196.1, 160.1, 119.1              |
| A8-B2 |    | 14.6     | 450.3 | 450.1(M), 449.4(M-1), 422.1(M-28), 421.1, 196.1, 119.1, 105.1, 77.1, 76.1         |
| A8-B3 |    | 14.0     | 450.3 | 450.1(M), 449.3(M-1), 422.1(M-28), 421.1, 349.0, 196.1, 168.1, 103.1, 91.1        |
| A8-B4 |   | 11.0     | 389.4 | 389.3(M), 388.1(M-1), 361.2(M-28), 305.2, 287.1, 168.1, 119.1, 103.1              |
| A8-B5 |  | 16.4     | 416.4 | 416.3(M), 415.1(M-1), 388.2(M-28), 314.1, 196.1, 168.1, 103.1, 91.1               |
| A8-B6 |  | 15.8     | 416.4 | 416.2(M), 415.0(M-1), 388.2(M-28), 314.1, 196.1, 168.0, 119.1, 76.1               |
| A8-B7 |  | 12.6     | 405.8 | 405.1(M), 404.1(M-1), 377.1(M-28), 303.1, 196.1, 168.1, 103.1, 77.1               |
| A8-B8 |  | 23.7     | 471.5 | 471.4(M), 470.1(M-1), 443.2(M-28), 196.1, 168.1, 119.1, 103.1, 65.0               |
| A8-B9 |  | 10.2     | 439.4 | 439.3(M), 438.3(M-1), 411.2(M-28), 412.2, 411.2, 337.1, 196.1, 168.0, 103.1, 77.1 |



|        |                                                                                     |      |       |                                                                                  |
|--------|-------------------------------------------------------------------------------------|------|-------|----------------------------------------------------------------------------------|
| A8-B10 | 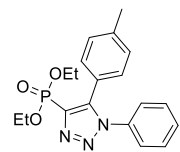   | 11.5 | 371.4 | 371.3(M), 370.1(M-1), 343.2(M-28), 287.1, 196.1, 168.1, 103.1, 77.1              |
| A8-B11 |    | 12.5 | 385.4 | 385.4(M), 384.0(M-1), 357.2(M-28), 283.1, 196.1, 168.1, 119.1, 91.1,             |
| A8-B12 |    | 15.2 | 497.3 | 497.2(M), 496.0(M-1), 469.1(M-28), 395.0, 196.1, 158.1, 119.1, 103.1, 77.1, 65.0 |
| A8-B13 |    | 14.2 | 419.9 | 419.8(M), 418.0(M-1), 391.2(M-28), 317.1, 196.1, 168.1, 103.1, 77.1              |
| A8-B14 |   | 12.7 | 405.8 | 405.8(M), 404.4(M-1), 377.1(M-28), 303.0, 196.1, 168.1, 103.1, 77.1              |
| A8-B15 |  | 10.3 | 439.4 | 439.3(M), 438.1(M-1), 411.4(M-28), 337.1, 196.1, 168.1, 103.1, 77.1              |
| A8-B16 |  | 11.1 | 389.4 | 389.2(M), 388.9(M-1), 361.2(M-28), 287.1, 196.1, 168.1, 103.1, 77.1              |
| A8-B17 |  | 10.8 | 389.4 | 389.3(M), 388.9(M-1), 361.2(M-28), 287.1, 196.1, 168.1, 103.1, 77.1              |
| A8-B18 |  | 9.9  | 425.4 | 425.2(M), 424.1(M-1), 397.2(M-28), 323.1, 196.1, 168.1, 103.1, 77.1              |

|        |                                                                                     |      |       |                                                                            |
|--------|-------------------------------------------------------------------------------------|------|-------|----------------------------------------------------------------------------|
| A8-B19 | 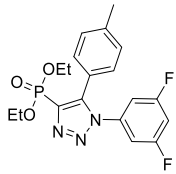   | 10.0 | 407.3 | 407.2(M), 406.1(M-1), 380.2(M-28), 379.2, 305.1, 108.1, 103.1, 65.0        |
| A8-B20 |    | 12.7 | 399.4 | 399.4(M), 398.1(M-1), 371.2(M-28), 297.1, 196.1, 168.1, 103.1, 77.1        |
| A8-B21 |    | 12.1 | 385.4 | 385.4(M), 384.0(M-1), 357.2(M-28), 196.1, 168.1, 103.1, 91.2,              |
| A8-B22 |   | 11.4 | 385.4 | 385.4(M), 384.8(M-1), 357.2(M-28), 220.2, 196.1, 168.1, 91.1, 65.0         |
| A8-B23 |  | 12.2 | 399.4 | 399.4(M), 398.8(M-1), 371.2(M-28), 234.2, 168.1, 119.1, 77.1, 65.0         |
| A8-B24 |  | 13.0 | 405.8 | 405.5(M), 404.0(M-1), 377.2(M-28), 303.1, 279.1, 196.1, 168.1, 103.1, 77.1 |
| A8-B25 |  | 13.6 | 401.4 | 401.4(M), 400.0(M-1), 373.2(M-28), 299.1, 196.1, 168.1, 103.1, 77.1        |
| A8-B26 |  | 12.7 | 401.4 | 401.4(M), 400.0(M-1), 373.2(M-28), 196.1, 168.1, 119.1, 77.1, 65.0         |

<sup>a</sup> The purity of the triazolyl phosphonate compounds were > 96%.

**Table S11** GC/MS data of compound A9-B1 to A9-B26.<sup>a</sup>

| Code   | Chemical structure                                                                  | RT (min) | MW    | Results of MS                                                                          |
|--------|-------------------------------------------------------------------------------------|----------|-------|----------------------------------------------------------------------------------------|
| A9-B1  | 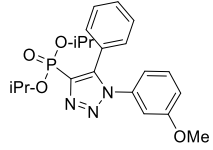   | 8.4      | 415.4 | 415.2(M), 414.3(M-1), 387.5(M-28), 304.1, 303.1, 208.1, 105.1, 89.2, 77.1              |
| A9-B2  |    | 13.4     | 464.3 | 464.3(M), 463.3(M-1), 436.1(M-28), 353.0, 333.0, 105.1, 89.1, 76.1,                    |
| A9-B3  |    | 12.9     | 464.3 | 464.1(M), 463.7(M-1), 436.1(M-28), 353.0, 335.0, 191.1, 165.1, 105.1, 89.1, 77.1, 76.1 |
| A9-B4  |   | 10.3     | 403.4 | 403.3(M), 402.3(M-1), 375.0(M-28), 291.1, 273.1, 105.1, 89.0                           |
| A9-B5  |  | 9.9      | 430.4 | 430.3(M), 429.1(M-1), 402.4(M-28), 319.1, 318.1, 300.1, 191.1, 105.1, 89.1             |
| A9-B6  |  | 9.8      | 430.4 | 430.2(M), 429.1(M-1), 402.5(M-28), 319.1, 318.1, 300.1, 199.1, 105.1, 89.1             |
| A9-B7  |  | 11.      | 419.9 | 419.8(M), 418.1(M-1), 391.1 (M-28), 309.1, 307.1, 289.1, 105.1, 89.1                   |
| A9-B8  |  | 21.3     | 485.5 | 485.1(M), 484.2(M-1), 457.2(M-28), 373.1, 374.2, 299.1, 207.0, 137.1                   |
| A9-B9  |  | 9.7      | 453.4 | 453.4(M), 452.1(M-1), 425.7(M-28), 342.1, 341.1, 323.1, 105.1, 89.1                    |
| A9-B10 |  | 10.7     | 385.4 | 385.4(M), 384.1(M-1), 357.2(M-28), 274.1, 273.1, 255.1, 105.1, 89.1, 77.1              |

|        |  |      |       |                                                                                           |
|--------|--|------|-------|-------------------------------------------------------------------------------------------|
| A9-B11 |  | 11.6 | 399.4 | 399.2(M), 398.2(M-1), 371.3(M-28), 287.1, 269.1, 206.1, 105.1, 89.1, 65.1                 |
| A9-B12 |  | 13.8 | 511.3 | 511.3(M), 510.3(M-1), 483.5 (M-28), 400.0, 399.0, 381.0, 207.1, 190.1, 179.1, 105.1, 89.1 |
| A9-B13 |  | 13.0 | 433.9 | 433.8(M), 432.2(M-1), 405.8(M-28), 323.1, 321.1, 303.1, 105.1, 89.1                       |
| A9-B14 |  | 11.8 | 419.9 | 419.3(M), 418.1(M-1), 391.2(M-28), 309.1, 307.1, 289.1, 105.1, 89.1                       |
| A9-B15 |  | 9.8  | 453.4 | 453.3(M), 452.1(M-1), 425.2(M-28), 342.1, 341.1, 343.1, 105.1, 89.1                       |
| A9-B16 |  | 10.4 | 403.4 | 403.1(M), 402.2(M-1), 375.5(M-28), 292.1, 291.1, 237.1, 105.1, 89.1                       |
| A9-B17 |  | 10.2 | 403.4 | 403.2(M), 402.2(M-1), 375.2(M-28), 291.1, 273.1, 105.1, 89.1                              |
| A9-B18 |  | 9.4  | 439.4 | 439.0(M), 438.2(M-1), 411.4(M-28), 327.1, 309.1, 105.1, 89.1                              |
| A9-B19 |  | 9.6  | 421.4 | 421.3(M), 420.2(M-1), 393.3(M-28), 309.1, 291.1, 105.1, 89.1                              |
| A9-B20 |  | 11.8 | 413.5 | 413.4(M), 412.2(M-1), 385.2(M-28), 302.2, 301.1, 283.1, 105.1, 89.0, 79.1                 |
| A9-B21 |  | 11.3 | 399.4 | 399.2(M), 398.1(M-1), 371.2(M-28), 288.1, 287.1, 269.1, 105.1, 89.1, 65.1                 |

|        |                                                                                    |      |       |                                                                            |
|--------|------------------------------------------------------------------------------------|------|-------|----------------------------------------------------------------------------|
| A9-B22 | 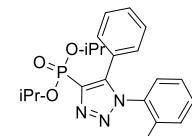  | 10.7 | 399.4 | 399.4(M), 398.2(M-1), 371.7(M-28), 287.1, 207.2, 206.2, 105.1, 91.1, 65.1  |
| A9-B23 |   | 11.4 | 413.5 | 413.4(M), 412.2(M-1), 385.3(M-28), 301.2, 218.2, 200.2, 204.1, 105.1, 77.1 |
| A9-B24 |   | 12.1 | 419.9 | 419.3(M), 418.1(M-1), 391.3(M-28), 309.1, 307.1, 289.1, 105.1, 89.1        |
| A9-B25 |   | 12.5 | 415.4 | 415.1(M), 414.2(M-1), 387.5(M-28), 304.1, 303.1, 285.1, 105.1, 89.1, 77.1  |
| A9-B26 |  | 11.8 | 415.4 | 415.4(M), 414.1(M-1), 387.9(M-28), 303.1, 285.1, 282.2, 203.1, 105.1, 77.1 |

<sup>a</sup> The purity of the triazolyl phosphonate compounds were > 96%.

**Table S12** GC/MS data of compound A10-B1 to A10-B26.<sup>a</sup>

| Code   | Chemical structure                                                                  | RT (min) | MW    | Results of MS                                                                            |
|--------|-------------------------------------------------------------------------------------|----------|-------|------------------------------------------------------------------------------------------|
| A10-B1 | 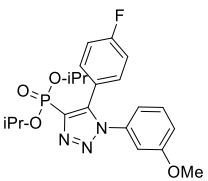   | 12.4     | 433.4 | 432.9(M), 432.1(M-1), 405.3(M-28), 332.1, 321.1, 241.1, 240.1, 226.1, 123.1, 107.1       |
| A10-B2 |    | 12.6     | 482.3 | 482.0(M), 481.3(M-1), 454.1(M-28), 372.0, 369.0, 123.1, 107.0, 76.1, 64.6, 57.4          |
| A10-B3 |    | 12.2     | 482.3 | 482.1(M), 481.2(M-1), 480.6, 454.1(M-28), 372.0, 369.0, 209.3, 123.1, 107.1, 75.1, 65.5  |
| A10-B4 |   | 10.0     | 421.4 | 421.1(M), 420.6(M-1), 393.4(M-28), 309.1, 291.1, 123.1, 107.1, 95.2, 75.2, 57.2          |
| A10-B5 |  | 14.2     | 448.4 | 448.3(M), 447.9(M-1), 446.2, 420.3(M-28), 336.1, 318.01, 209.1, 123.1, 107.1, 76.5, 65.4 |
| A10-B6 |  | 13.6     | 448.4 | 448.3(M), 447.9(M-1), 447.0, 432.6, 420.3(M-28), 337.1, 318.1, 209.1, 107.1, 76.1, 62.3  |
| A10-B7 |  | 11.1     | 437.8 | 437.7(M), 436.6(M-1), 409.5(M-28), 327.1, 307.0, 243.6, 229.7, 123.1, 107.1              |
| A10-B8 |  | 11.0     | 503.5 | 475.5(M-28), 392.2, 391.2, 335.1, 317.1, 208.1, 207.1, 123.1, 107.1, 65.1                |
| A10-B9 |  | 9.4      | 471.4 | 471.3(M), 470.2(M-1), 443.8(M-28), 401.5, 370.2, 341.1, 279.6, 172.4, 145.3, 123.1       |

|         |                                                                                     |      |       |                                                                                           |
|---------|-------------------------------------------------------------------------------------|------|-------|-------------------------------------------------------------------------------------------|
| A10-B10 | 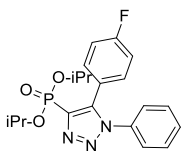   | 10.3 | 403.4 | 402.8(M-1), 375.7(M-28), 333.7, 302.5, 273.1, 211.3, 183.3, 123.1, 107.1                  |
| A10-B11 |    | 11.0 | 417.4 | 417.4(M), 416.2(M-1), 389.4(M-28), 347.7, 305.1, 224.8, 123.1, 107.1, 91.3, 65.6          |
| A10-B12 |    | 13.0 | 529.3 | 529.2(M), 528.9(M-1), 501.5(M-28), 417.0, 399.0, 230.1, 208.1, 197.1, 183.1, 123.1, 107.1 |
| A10-B13 |    | 12.3 | 451.9 | 451.5(M), 450.1(M-1), 423.2(M-28), 381.8, 339.1, 258.0, 224.5, 172.4, 123.1, 107.0        |
| A10-B14 |   | 11.2 | 437.8 | 437.5(M), 436.1(M-1), 409.3(M-28), 327.1, 245.5, 183.5, 132.6, 123.1, 75.5                |
| A10-B15 |  | 9.5  | 471.4 | 471.3(M), 470.0(M-1), 443.3(M-28), 370.3, 341.1, 279.3, 172.5, 123.1, 95.5                |
| A10-B16 |  | 10.0 | 421.4 | 421.3(M), 420.1(M-1), 393.3(M-28), 351.4, 309.1, 230.0, 123.1, 107.1, 95.3, 75.4          |
| A10-B17 |  | 9.8  | 421.4 | 421.3(M), 420.1(M-1), 393.4(M-28), 229.5, 123.1, 107.0, 95.4, 75.3                        |
| A10-B18 |  | 9.2  | 457.4 | 457.0(M), 456.1(M-1), 429.4(M-28), 387.7, 345.1, 365.3, 237.4, 158.6, 123.1, 81.6         |

|         |                                                                                     |      |       |                                                                                   |
|---------|-------------------------------------------------------------------------------------|------|-------|-----------------------------------------------------------------------------------|
| A10-B19 | 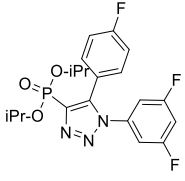   | 9.2  | 439.4 | 439.0(M), 438.2(M-1), 411.5(M-28), 369.6, 327.1, 247.3219.5, 123.1, 107.1, 95.4   |
| A10-B20 |    | 11.2 | 431.4 | 431.4(M), 430.1(M-1), 403.3(M-28), 320.1, 319.1, 238.2, 207.1, 123.1, 107.1, 77.1 |
| A10-B21 |    | 11.7 | 417.4 | 417.2(M), 416.6(M-1), 403.2(M-28), 306.1, 305.1, 225.0, 224.1, 123.1, 107.1, 91.1 |
| A10-B22 |   | 10.2 | 417.4 | 417.3(M), 416.5(M-1), 389.3(M-28), 320.1, 319.1, 237.1, 222.1, 123.0, 77.1, 65.7  |
| A10-B23 |  | 10.8 | 431.4 | 431.4(M), 430.2(M-1), 403.5(M-28), 320.1, 319.1, 237.1, 236.1, 222.1, 123.1, 77.1 |
| A10-B24 |  | 11.5 | 437.8 | 437.3(M), 436.7(M-1), 409.3(M-28), 327.1, 326.1, 307.0, 123.1, 107.0, 75.3, 65.3  |
| A10-B25 |  | 11.8 | 433.4 | 433.3(M), 432.3(M-1), 405.2(M-28), 321.1, 303.1, 107.1, 77.1, 64.6, 62.7, 57.4    |
| A10-B26 |  | 11.2 | 433.4 | 433.4(M), 432.3(M-1), 405.5(M-28), 322.1, 303.1, 123.1, 107.1, 92.1, 77.1, 64.5   |

**Table S13** GC/MS data of compound A11-B1 to A11-B26.



| Code   | Chemical structure | RT (min) | MW    | Results of MS                                                                                        |
|--------|--------------------|----------|-------|------------------------------------------------------------------------------------------------------|
| A11-B1 |                    | 15.8     | 438.2 | 439.1(M), 437.1(M), 411.1(M-28), 409.1(M-28), 248.0, 246.0, 233.0, 231.0, 167.0, 165.0               |
| A11-B2 |                    | 16.3     | 487.1 | 489.0(M), 487.5(M), 461.0(M-28), 458.0(M-28), 246.0, 231.0, 233.0, 183.0, 167.0, 155.0               |
| A11-B3 |                    | 15.6     | 487.1 | 486.8(M), 488.0(M), 458.0(M-28), 461.0(M-28), 248.0, 231.0, 230.0, 185.0, 183.0, 167.0               |
| A11-B4 |                    | 11.8     | 426.2 | 425.2(M), 427.1(M), 397.0(M-28), 399.0(M-28), 248.0, 246.0, 233.0, 231.0, 169.0, 167.0               |
| A11-B5 |                    | 18.9     | 453.2 | 452.3(M), 454.2(M), 424.1(M-28), 426.1(M-28), 246.0, 248.0, 231.0, 233.0, 190.1, 191.1               |
| A11-B6 |                    | 18.0     | 453.2 | 452.2(M), 454.2(M), 424.1(M-28), 426.1(M-28), 246.0, 248.0, 190.1, 191.2, 79.0, 75.1                 |
| A11-B7 |                    | 13.7     | 442.6 | 441.0(M), 443.0(M), 413.0(M-28), 415.0(M-28), 246.0, 248.0, 231.0, 233.0, 167.0, 169.0, 183.0, 185.0 |
| A11-B8 |                    | 14.6     | 508.3 | 507.0(M), 509.9(M), 481.0(M-28), 479.3(M-28), 373.1, 317.1, 315.1, 270.0, 272.1, 194.0               |

|         |  |      |       |                                                                                         |
|---------|--|------|-------|-----------------------------------------------------------------------------------------|
| A11-B9  |  | 10.8 | 476.2 | 475.4(M), 477.1(M), 447.1(M-28), 449.1(M-28), 272.1, 248.0, 246.0, 233.0, 231.0, 93.0   |
| A11-B10 |  | 12.4 | 408.2 | 409.0(M), 407.0(M), 381.0(M-28), 379.0(M-28), 248.0, 246.0, 232.9, 230.9, 185.0, 183.0  |
| A11-B11 |  | 13.5 | 422.2 | 423.1(M), 421.1(M), 395.1(M-28), 393.1(M-28), 248.0, 246.0, 233.0, 231.0, 185.0, 183.0  |
| A11-B12 |  | 11.2 | 534.1 | 535.0(M), 533.8(M), 507.0(M-28), 505.2(M-28), 426.9, 425.1, 398.9, 396.9, 191, 1, 190.1 |
| A11-B13 |  | 15.7 | 456.7 | 457.2(M), 455.1(M), 429.0(M-28), 427.0(M-28), 248.0, 246.0, 169.0, 167.0, 79.0, 78.5    |
| A11-B14 |  | 13.9 | 442.6 | 443.2(M), 441.1(M), 415.0(M-28), 413.0(M-28), 248.0, 246.0, 185.0, 183.0, 111.0, 109.0  |
| A11-B15 |  | 11.0 | 476.2 | 477.7(M), 475.1(M), 449.1(M-28), 447.0(M-28), 248.0, 246.0, 233.0, 231.0, 185.1, 183.0  |
| A11-B16 |  | 11.8 | 426.2 | 427.1(M), 425.1(M), 399.1(M-28), 397.1(M-28), 248.0, 246.0, 231.0, 233.0, 167.0, 93.0   |
| A11-B17 |  | 11.6 | 426.2 | 427.2(M), 425.4(M), 399.1(M-28), 246.0, 239.0, 233.1, 207.1, 183.0, 167.0, 135.1,       |

|         |  |      |       |                                                                                                      |
|---------|--|------|-------|------------------------------------------------------------------------------------------------------|
| A11-B18 |  | 10.4 | 462.2 | 461.9(M), 463.0(M), 435.1(M-28), 433.1(M-28), 246.0, 248.0, 235.1, 185.0, 169.1, 183.0               |
| A11-B19 |  | 11.6 | 444.2 | 455.5(M), 443.9(M), 417.1(M-28), 415.1(M-28), 248.0, 246.0, 207.1, 183.2, 109.4                      |
| A11-B20 |  | 138  | 436.3 | 437.1(M), 435.1(M), 409.1(M-28), 407.1(M-28), 314.1, 312.1, 246.0, 248.0, 103.1, 105.1               |
| A11-B21 |  | 13.0 | 422.2 | 423.1(M), 421.1(M), 395.1(M-28), 393.1(M-28), 293.1, 295.1, 300.1, 298.1, 248.0, 246.0, 233.0, 231.0 |
| A11-B22 |  | 12.3 | 422.2 | 423.1(M), 421.1(M), 395.1(M-28), 393.1(M-28), 285.1, 283.1, 93.0, 91.0, 65.1, 63.1                   |
| A11-B23 |  | 13.2 | 436.3 | 437.4(M), 435.1(M), 409.1(M-28), 407.1(M-28), 299.1, 297.1, 219.2, 217.1, 185.0, 183.0, 79.1, 77.1   |
| A11-B24 |  | 14.4 | 442.6 | 443.2(M), 441.2(M), 415.0(M-28), 413.0(M-28), 248.0, 246.0, 233.0, 231.0, 185.0, 183.0               |
| A11-B25 |  | 14.9 | 438.2 | 439.2(M), 437.2(M), 411.1(M-28), 409.1(M-28), 248.0, 246.0, 233.0, 231.0, 185.1, 183.0               |
| A11-B26 |  | 13.9 | 438.2 | 439.1(M), 437.1(M), 411.1(M-28), 409.1(M-28), 300.0, 298.0, 246.0, 248.0, 185.0, 183.0               |

<sup>a</sup> The purity of the triazolyl phosphonate compounds were > 96%.

**Table S14** GC/MS data of compound A12-B1 to A12-B26.<sup>a</sup>

| Code   | Chemical structure | RT (min) | MW     | Results of MS                                                                                                    |
|--------|--------------------|----------|--------|------------------------------------------------------------------------------------------------------------------|
| A12-B1 |                    | 17.2     | 466.3  | 467.3(M), 465.2(M), 439.1(M-28), 437.1(M-28), 383.0, 381.0, 365.0, 363.0, 185.0, 183.0                           |
| A12-B2 |                    | 17.6     | 515.1  | 487.0(M-28), 489.0(M-28), 431.0, 412.9, 351.0, 262.0, 260.0, 234.0, 232.0, 210.0, 208.0, 185.0                   |
| A12-B3 |                    | 16.8     | 515.1  | 488.0(M-28), 486.0(M-28), 461.0, 457.0, 262.0, 260.0, 234.0, 232.0, 185.0, 183.0                                 |
| A12-B4 |                    | 13.4     | 454.2  | 455.1(M), 453.3(M), 427.1(M-28), 425.1(M-28), 353.0, 351.0, 234.0, 232.0, 169.0, 167.0                           |
| A12-B5 |                    | 20.7     | 481.2  | 482.4(M), 480.1(M), 454.1(M-28), 452.1(M-28), 426.0, 424.0, 318.0, 316.0, 262.0, 260.0                           |
| A12-B6 |                    | 19.5     | 481.2  | 482.1(M), 480.2(M), 454.1(M-28), 452.1(M-28), 380.0, 378.0, 262.0, 260.0, 234.0, 232.0                           |
| A12-B7 |                    | 14.6     | 470.7  | 471.0(M), 469.0(M), 443.0(M-28), 441.0(M-28), 387.0, 385.0, 369.0, 367.0, 262.0, 260.0                           |
| A12-B8 |                    | 16.6     | 536.36 | 535.1(M), 537.1(M), 507.3(M-28), 509.5(M-28), 488.8, 487.0, 348.7, 351.0, 260.0, 262.0, 169.0, 167.0, 88.1, 81.0 |

|         |  |      |       |                                                                                                |
|---------|--|------|-------|------------------------------------------------------------------------------------------------|
| A12-B9  |  | 11.3 | 504.2 | 477.1(M-28), 475.4(M-28), 403.3, 401.3, 340.0, 339.0, 262.0, 260.0, 234.0, 232.0, 198.1, 169.0 |
| A12-B10 |  | 12.0 | 436.3 | 437.2(M), 435.1(M), 407.1(M-28), 409.1(M-28), 335.0, 333.0, 373.0, 371.1, 262.0, 260.0         |
| A12-B11 |  | 14.4 | 450.3 | 451.3(M), 449.2(M), 423.1(M-28), 421.1(M-28), 367.0, 365.0, 3459.0, 347.0, 234.0, 232.0        |
| A12-B12 |  | 11.1 | 562.1 | 563.6(M), 535.2(M-28), 533.3(M-28), 459.1, 207.1, 190.1, 163.0, 127.0, 128.0, 76.1, 73.1       |
| A12-B13 |  | 16.9 | 484.7 | 485.0(M), 483.4(M), 457.1(M-28), 455.1(M-28), 401.0, 399.0, 383.0, 381.0, 234.0, 232.0         |
| A12-B14 |  | 14.9 | 470.7 | 471.1(M), 469.1(M), 443.0(M-28), 441.0(M-28), 387.0, 385.0, 369.0, 367.0, 262.0, 260.0         |
| A12-B15 |  | 11.5 | 504.2 | 477.1(M-28), 475.2(M-28), 403.0, 401.1, 341.0, 339.0, 262.0, 260.0, 234.0, 232.0               |
| A12-B16 |  | 12.5 | 454.2 | 455.2(M), 453.1(M), 427.1(M-28), 425.1(M-28), 353.0, 351.0, 234.0, 232.0, 169.0, 167.0         |
| A12-B17 |  | 12.2 | 454.2 | 455.2(M), 453.1(M), 427.1(M-28), 425.1(M-28), 371.0, 369.0, 353.0, 351.0, 262.0, 260.0         |

|         |  |      |       |                                                                                                      |
|---------|--|------|-------|------------------------------------------------------------------------------------------------------|
| A12-B18 |  | 10.9 | 490.2 | 491.1(M), 489.1(M), 463.1(M-28), 461.1(M-28), 389.1, 387.0, 262.0, 260.0, 234.0, 232.0               |
| A12-B19 |  | 11.1 | 472.2 | 473.1(M), 471.1(M), 445.1(M-28), 443.1(M-28), 389.0, 387.0, 371.0, 369.0, 234.0, 232.0               |
| A12-B20 |  | 14.7 | 464.3 | 465.2(M), 463.2(M), 437.1(M-28), 435.1(M-28), 381.1, 379.0, 363.0, 361.0, 262.0, 260                 |
| A12-B21 |  | 13.9 | 450.3 | 451.3(M), 449.2(M), 423.1(M-28), 421.1(M-28), 349.0, 347.0, 262.0, 260.0, 234.0, 232.0               |
| A12-B22 |  | 13.0 | 450.2 | 451.1(M), 449.1(M), 423.1(M-28), 421.1(M-28), 262.0, 260.0, 234.0, 232.0, 204.1, 144.1               |
| A12-B23 |  | 14.1 | 464.3 | 465.2(M), 463.1(M), 437.1(M-28), 435.1(M-28), 300.1, 298.1, 262.0, 260.0, 234.0, 232.0               |
| A12-B24 |  | 15.5 | 470.7 | 471.2(M), 469.2(M), 443.0(M-28), 441.0(M-28), 369.0, 367.0, 262.0, 260.0, 232.0, 234.0               |
| A12-B25 |  | 16.0 | 466.3 | 467.4(M), 465.2(M), 439.1(M-28), 437.1(M-28), 365.0, 363.0, 262.0, 260.0, 234.0, 232.0               |
| A12-B26 |  | 14.9 | 466.3 | 467.3(M), 464.0(M), 439.1(M-28), 437.1(M-28), 262.0, 260.0, 234.0, 232.0, 185.0, 183.0, 121.0, 120.0 |

<sup>a</sup> The purity of the triazolyl phosphonate compounds were > 96%.

**Table S15:** Inhibition rate of compound TA-101 against the growth of *Rhizoctonia solani*

| Concentration (mg/mL) | 0    | 0.005 | 0.05  | 0.5   | 1    | 5    |
|-----------------------|------|-------|-------|-------|------|------|
| Growth diameter (mm)  | 14.3 | 8.2   | 3.7   | 0.5   | 0    | 0    |
| Inhibitory (%)        |      | 42.7% | 74.1% | 96.5% | 100% | 100% |
| Growth diameter (mm)  | 14.0 | 8.0   | 3.0   | 1.0   | 0    | 0    |
| Inhibitory (%)        |      | 42.9% | 78.6% | 93.0% | 100% | 100% |
| Growth diameter (mm)  | 12.0 | 7.2   | 2.0   | 0.5   | 0    | 0    |
| Inhibitory (%)        |      | 40%   | 83.3% | 95.8% | 100% | 100% |

**Table S16:** Inhibition rate of compound TA-125 against the growth of *Rhizoctonia solani*

| Concentration (mg/mL) | 0    | 0.005 | 0.05  | 0.5   | 1    | 5    |
|-----------------------|------|-------|-------|-------|------|------|
| Growth diameter (mm)  | 14.0 | 8.5   | 4.0   | 0.5   | 0    | 0    |
| Inhibitory (%)        |      | 39.3% | 71.4% | 96.4% | 100% | 100% |
| Growth diameter (mm)  | 15.0 | 8.5   | 4.2   | 2.0   | 0    | 0    |
| Inhibitory (%)        |      | 43.3% | 72.0% | 86.7% | 100% | 100% |
| Growth diameter (mm)  | 15.0 | 10    | 6.3   | 2.5   | 0    | 0    |
| Inhibitory (%)        |      | 33.3% | 58%   | 83.3% | 100% | 100% |

**Table S17:** Inhibition rate of compound TA-133 against the growth of *Rhizoctonia solani*

| Concentration (mg/mL) | 0    | 0.005 | 0.05  | 0.5   | 1     | 5    |
|-----------------------|------|-------|-------|-------|-------|------|
| Growth diameter (mm)  | 14.0 | 8.0   | 5.0   | 0.5   | 0     | 0    |
| Inhibitory (%)        |      | 42.9% | 64.2% | 96.4% | 100%  | 100% |
| Growth diameter (mm)  | 13.0 | 7.0   | 3.5   | 0.5   | 0     | 0    |
| Inhibitory (%)        |      | 46.2% | 73.1% | 96.2% | 100%  | 100% |
| Growth diameter (mm)  | 15.0 | 14.0  | 6.0   | 2.5   | 1.2   | 0    |
| Inhibitory (%)        |      | 6.7%  | 60.0% | 83.3% | 92.0% | 100% |

**Table S18** The benefits of the integrated workflow for bioactive molecule discovery triggered by ILDDS.

| Retry | Items                                       | Solution                                                                                                                                                   |
|-------|---------------------------------------------|------------------------------------------------------------------------------------------------------------------------------------------------------------|
| 1     | High atom efficiency and waste minimization | <i>H<sub>2</sub>O as solely by-product; The optimized catalyst choline acetate (A7-B1) is recoverable and reused.</i>                                      |
| 2     | Safe solvents and reagents                  | <i>No reaction solvents; The optimized ionic liquid A7-B1 is biocompatible and nontoxic.</i>                                                               |
| 3     | Elimination of unnecessary steps            | <i>No chromatographic separations; In-situ biological assays for target products.</i>                                                                      |
| 4     | Energy utilization minimization             | <i>Reaction and isolation are conducted in parallel in tubes under open; No specialized and high energy-consumption instruments.</i>                       |
| 5     | Low cost                                    | <i>Raw materials are Inexpensive and widely used bulk chemicals. acetic acid (\$55 per 1L); choline chloride (\$20 per 100g); aniline (\$35 per 100g).</i> |

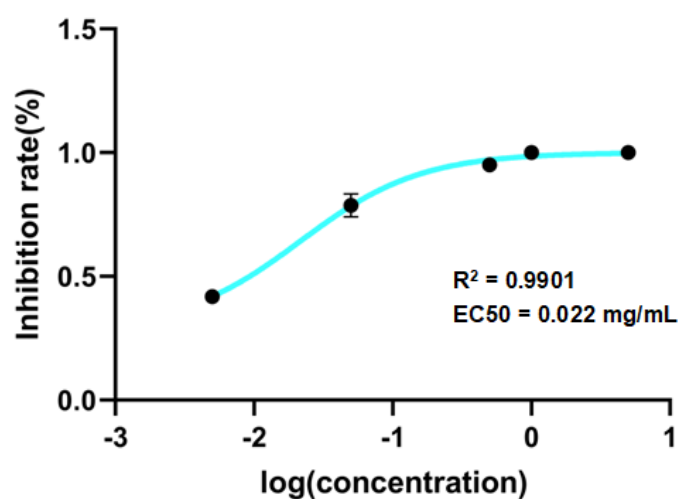

Figure S10 Inhibition rate curve of compound TA-101



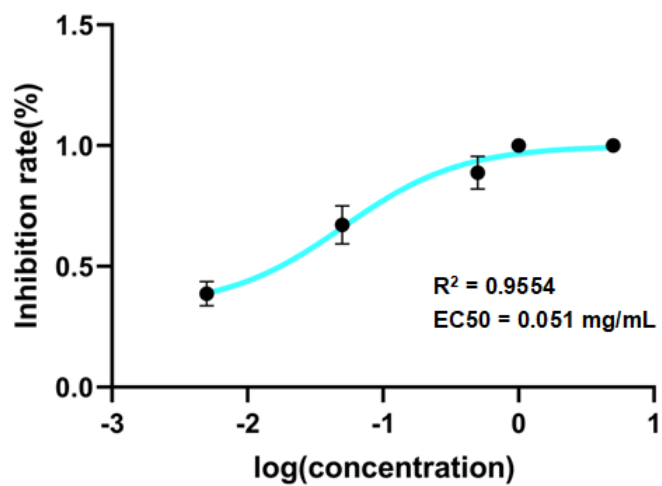

Figure S11 Inhibition rate curve of compound TA-125

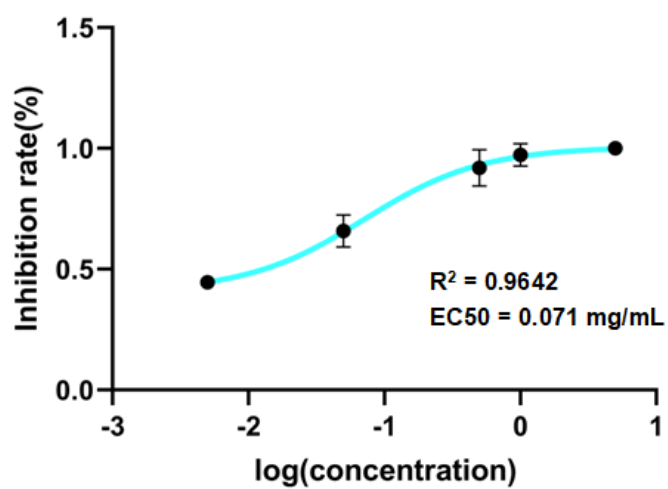

Figure S12 Inhibition rate curve of compound TA-133

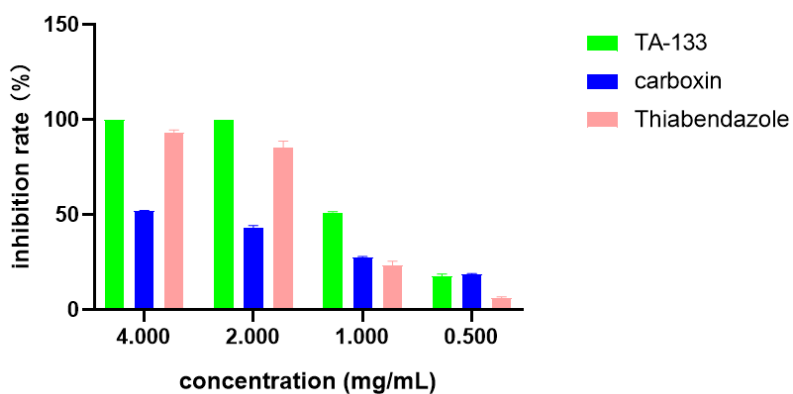

Figure S13 Comparison of inhibitive bioactivity of TA-133 with Carboxin and Thiabendazole at different concentrations.

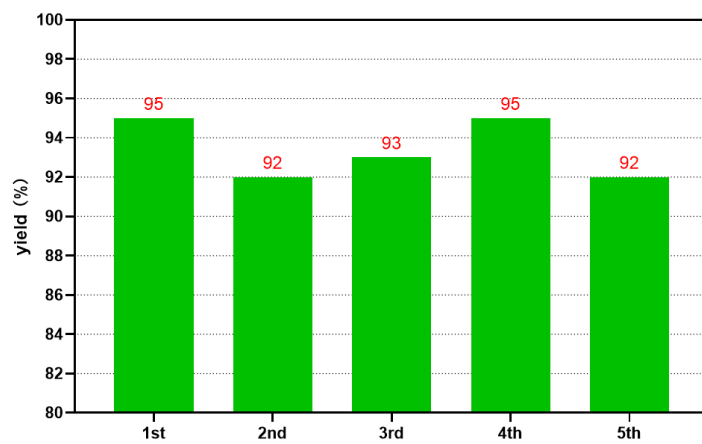

Figure S14 Recycling and reuse of ionic liquid A7-B1 in the synthesis of triazolyl phosphonate.

# $^1\text{H}$ NMR and $^{13}\text{C}$ NMR spectra of ionic liquids

A3-B1: [MTBD][Ac]

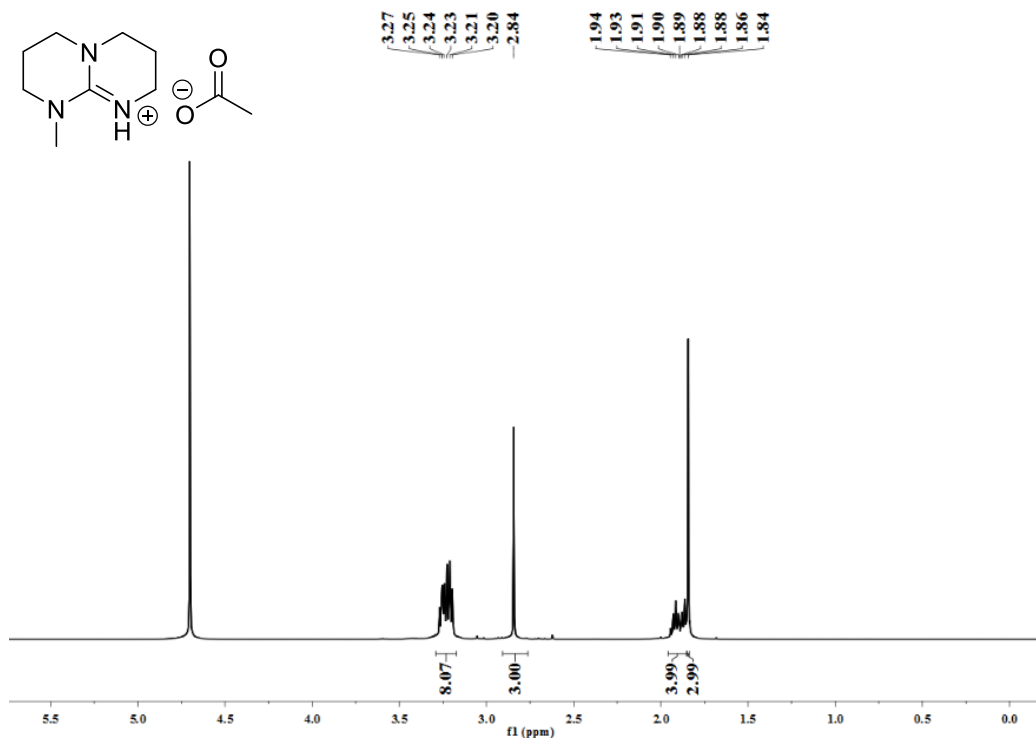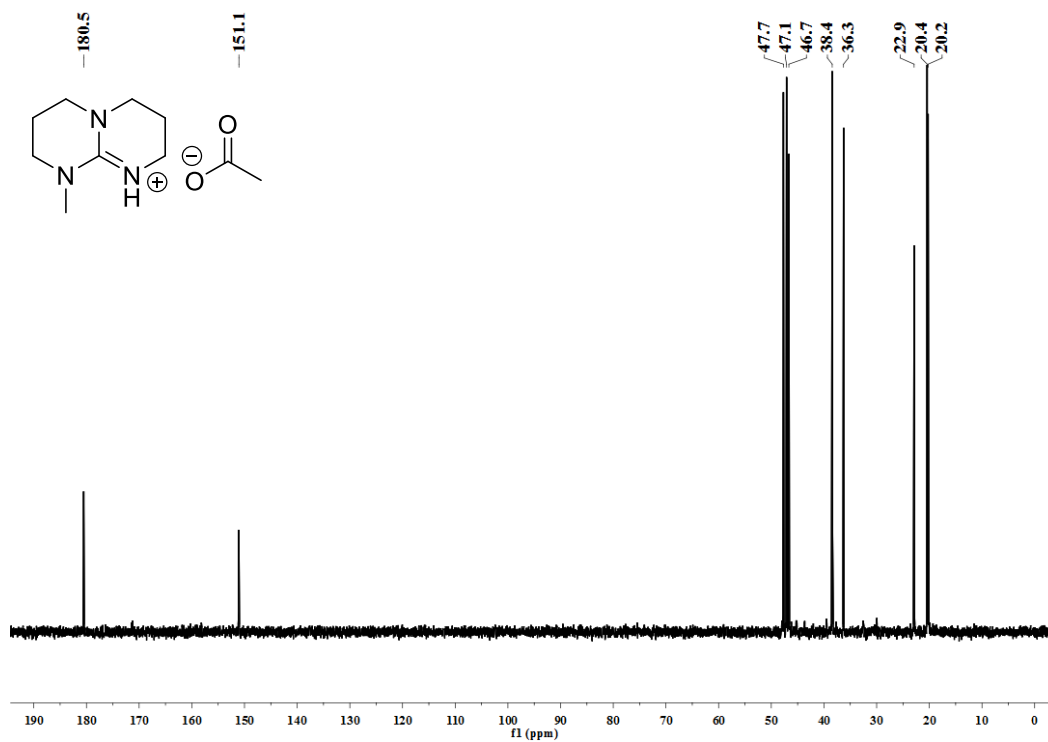

A3-B2: [MTBD][Pro]

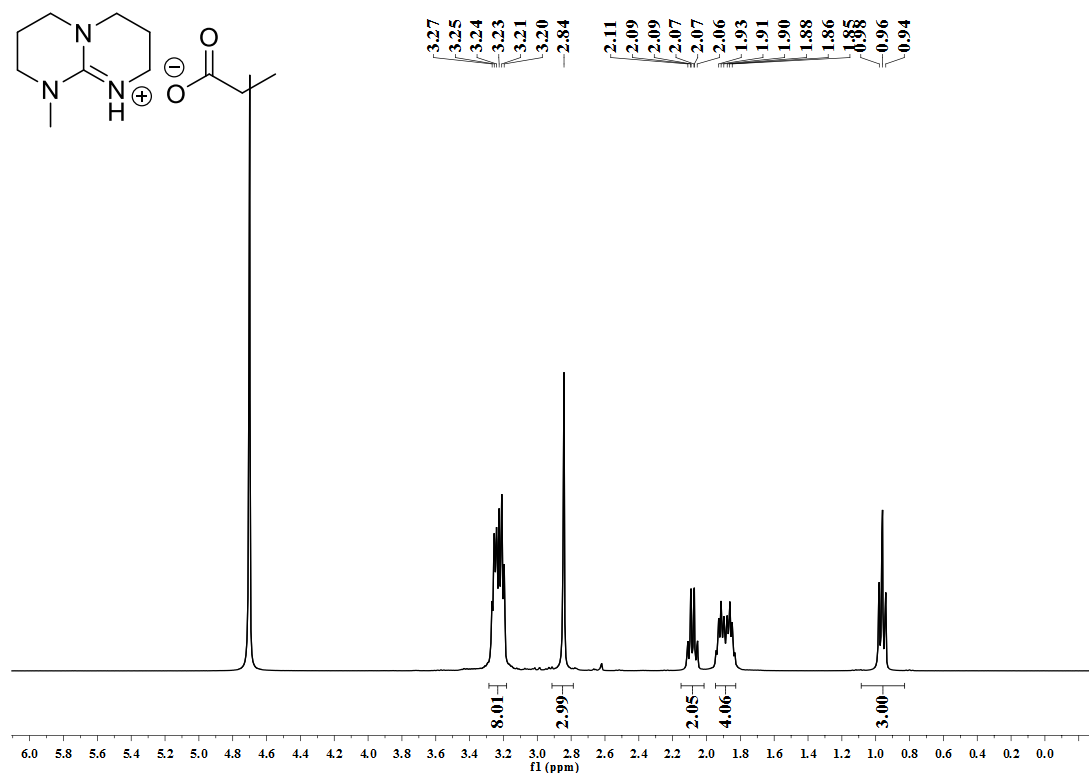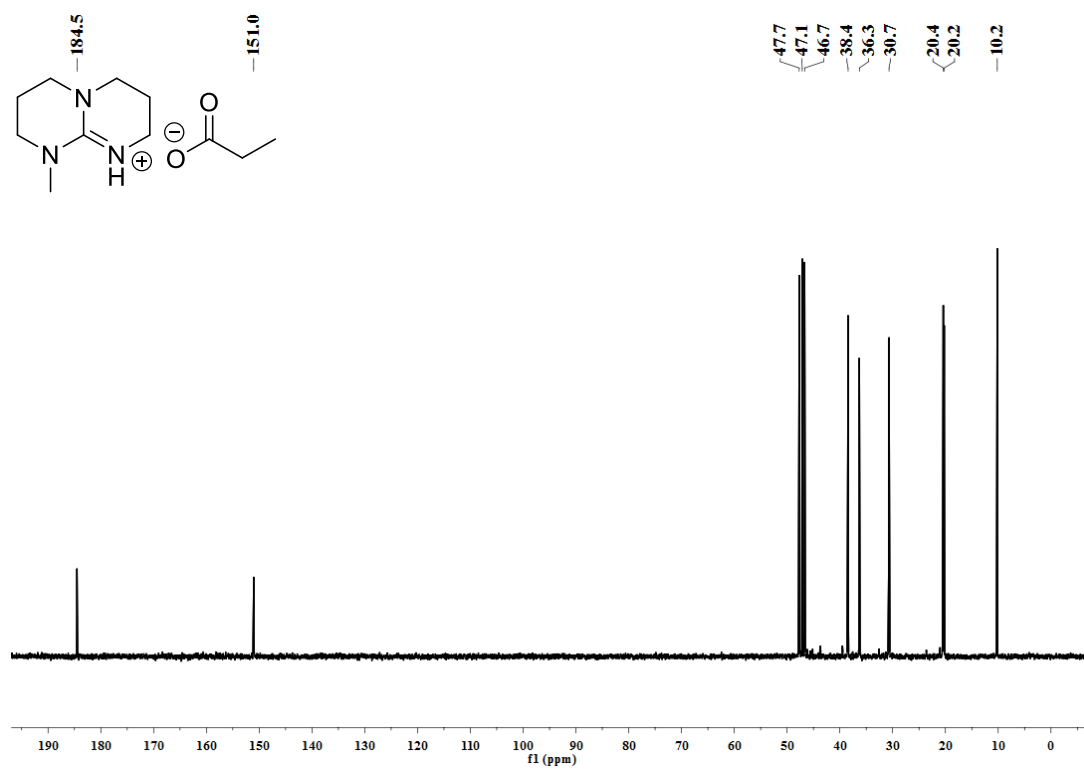

A3-B3: [MTBD][But]

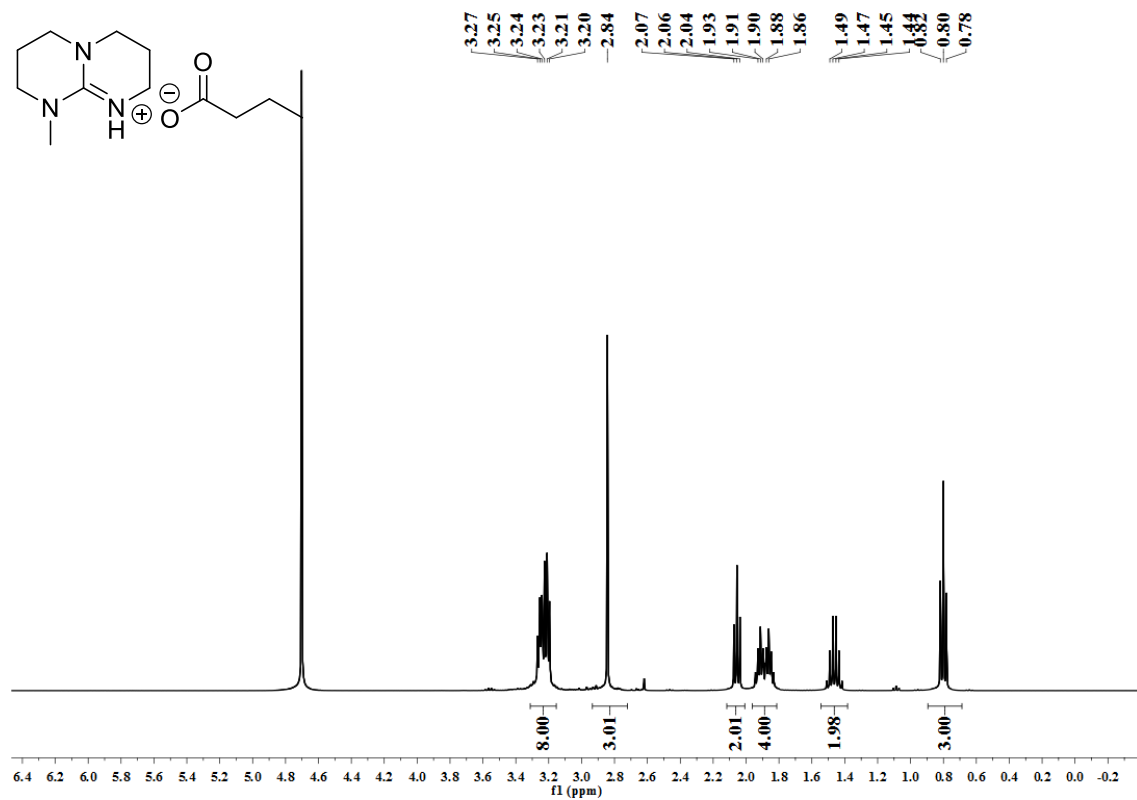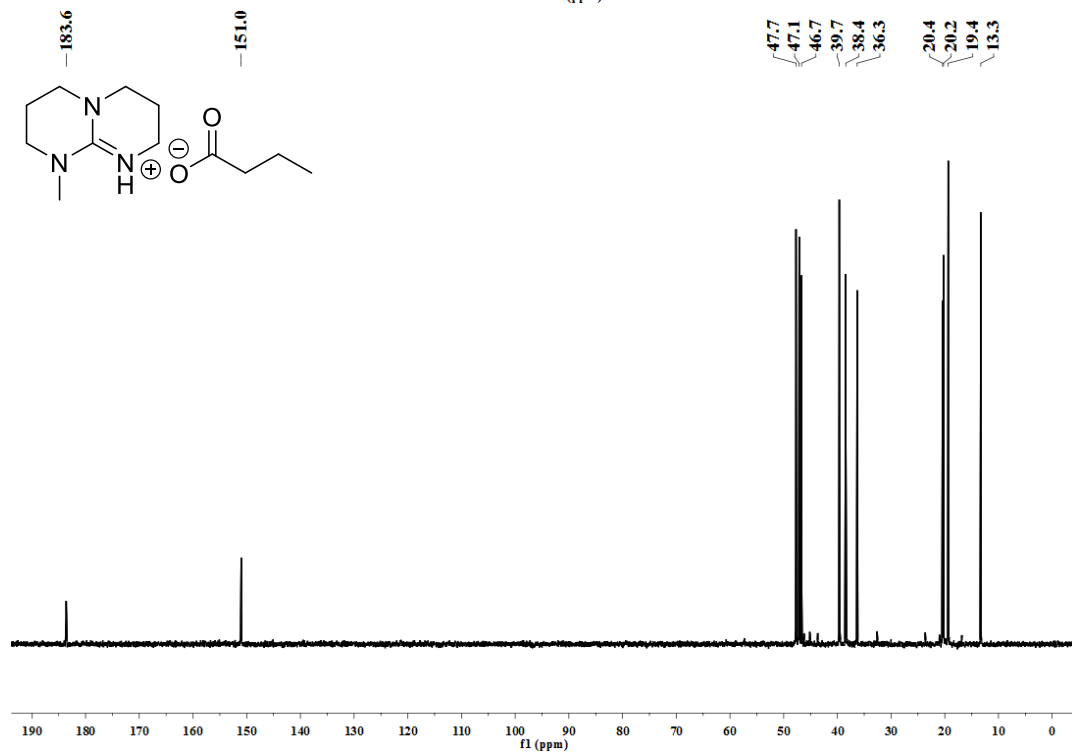

A3-B4: [MTBD][Val]

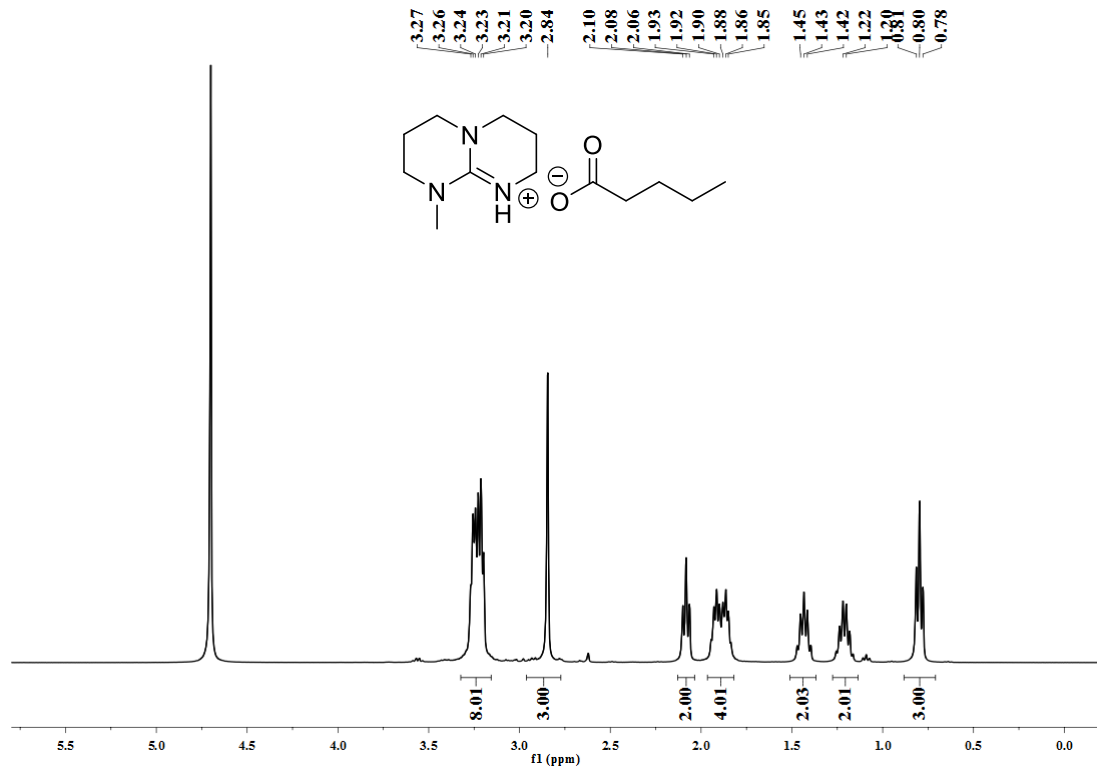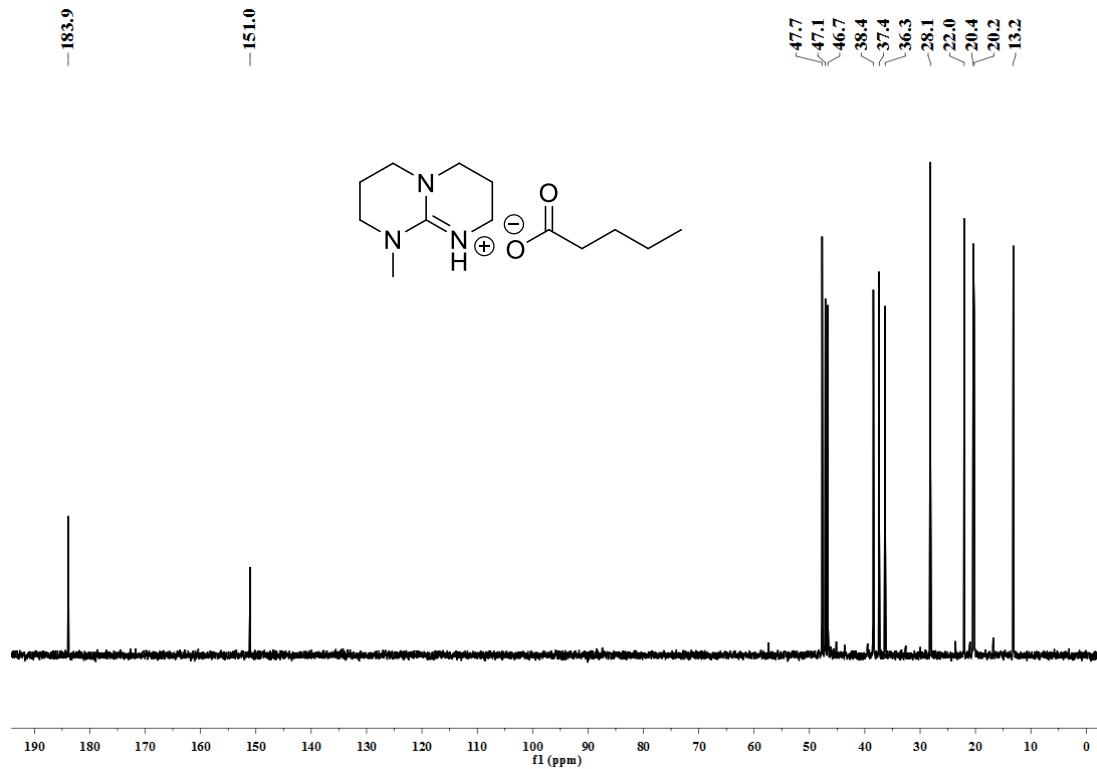

A3-B5: [MTBD][Ben]

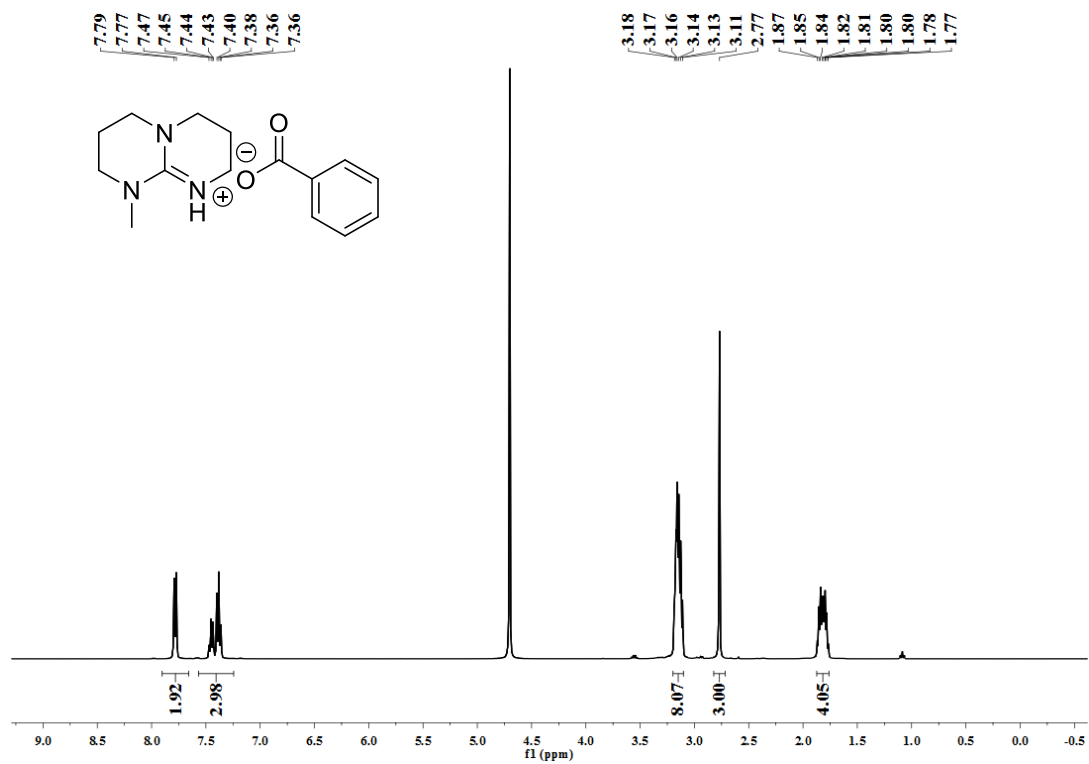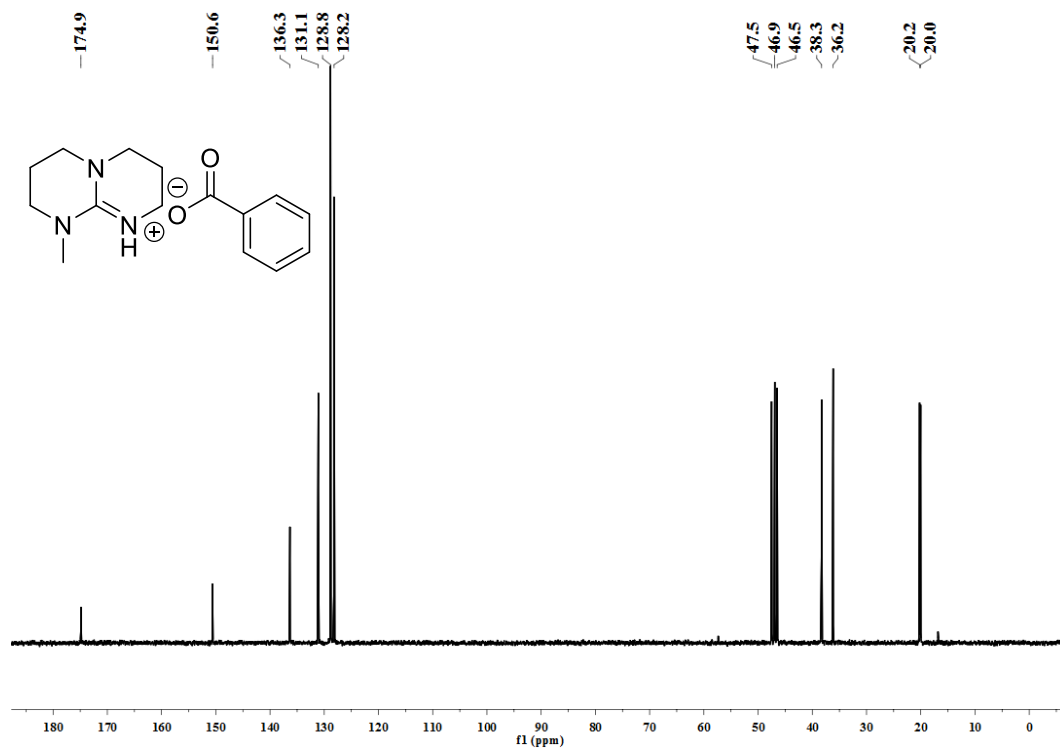

A3-B6: [MTBD][Ani]

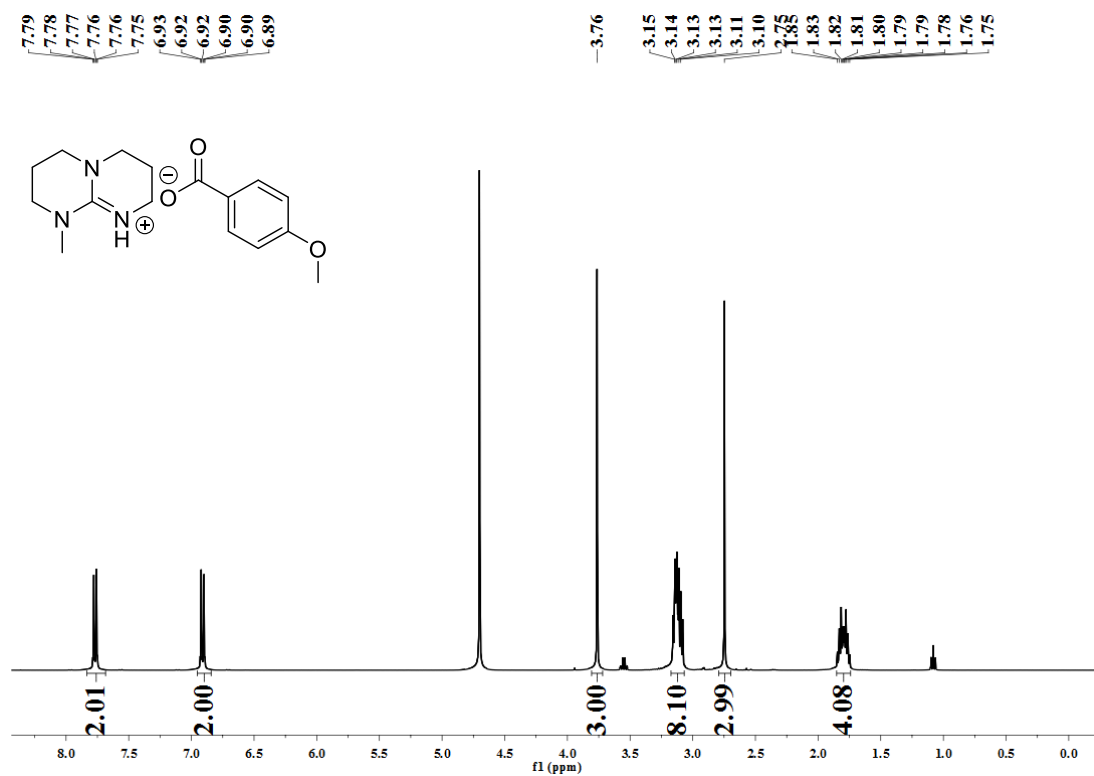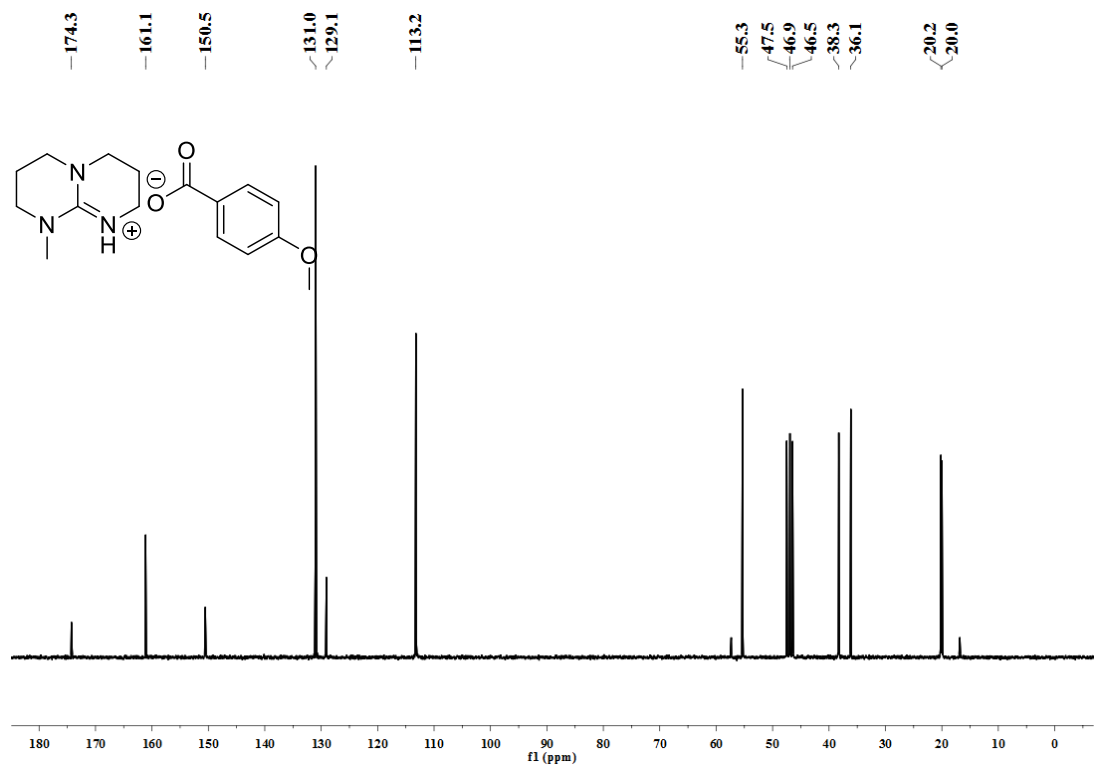



A3-B7: [MTBD][Gly]

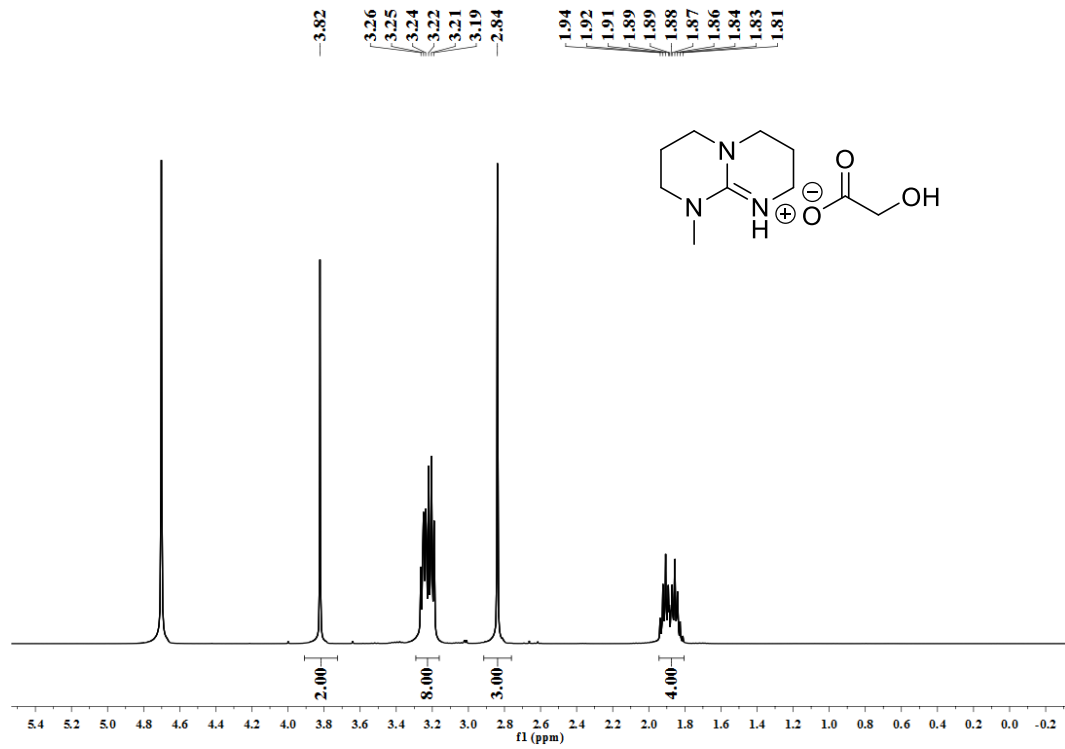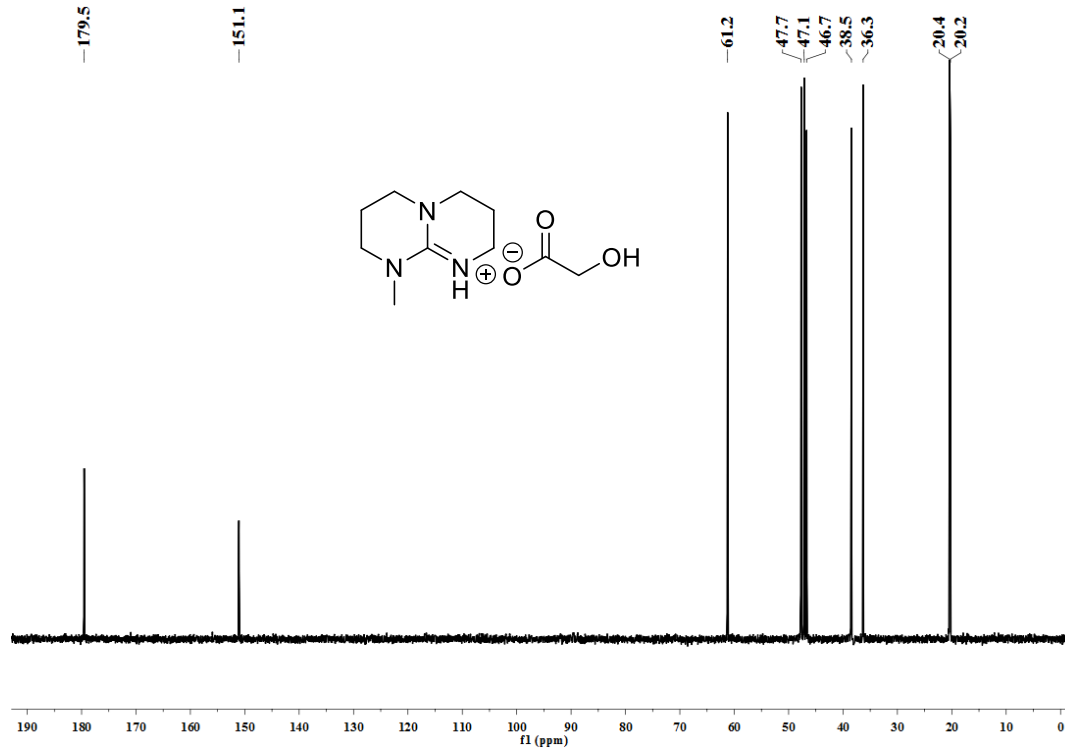

A3-B8: [MTBD][Lac]

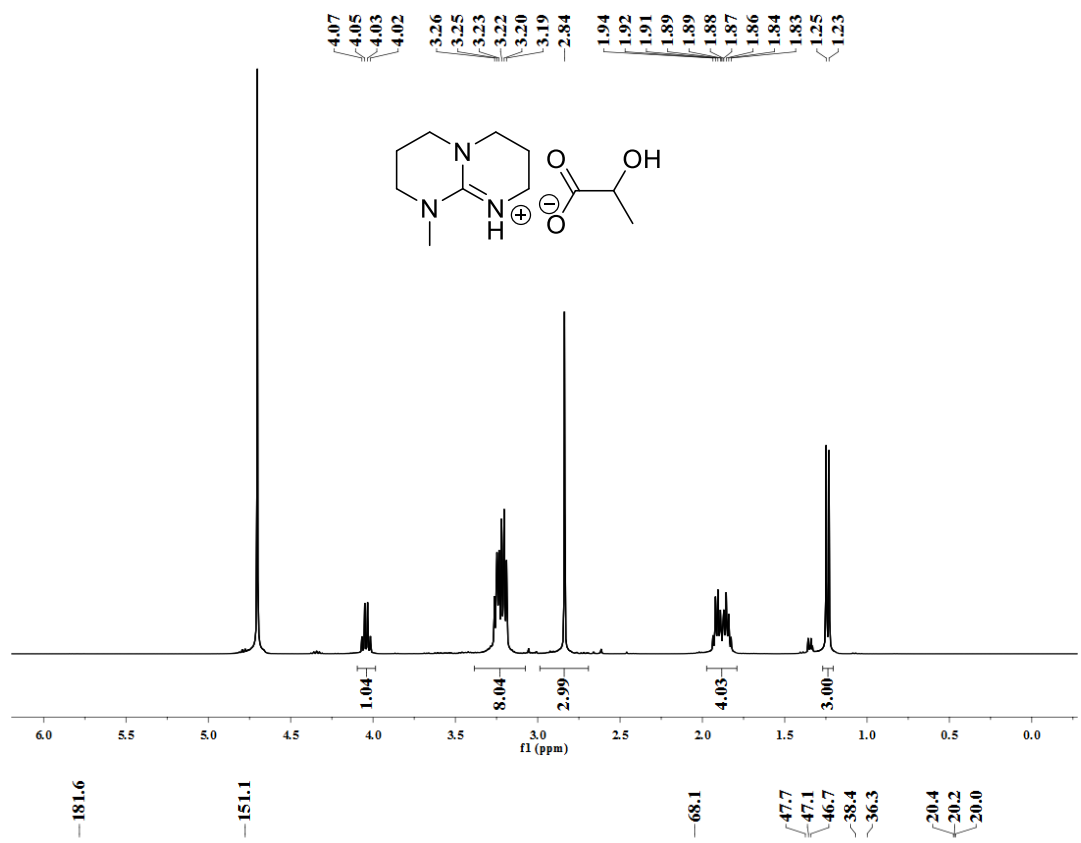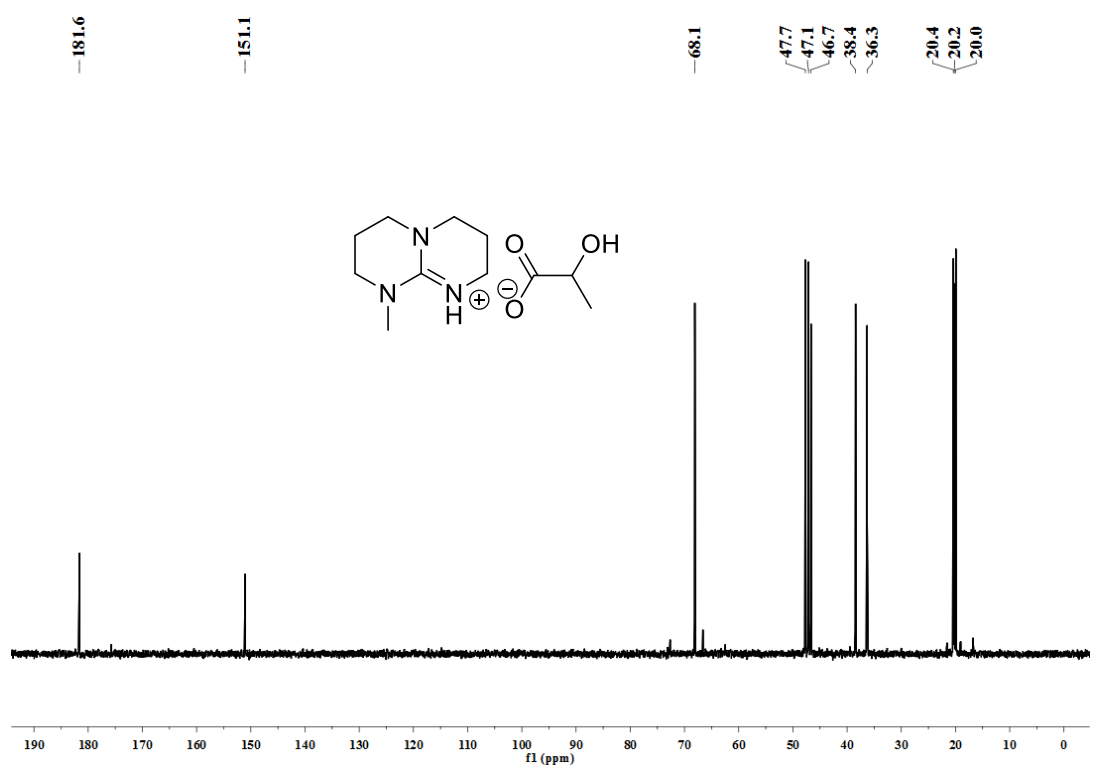

A3-B9: [MTBD][Cro]

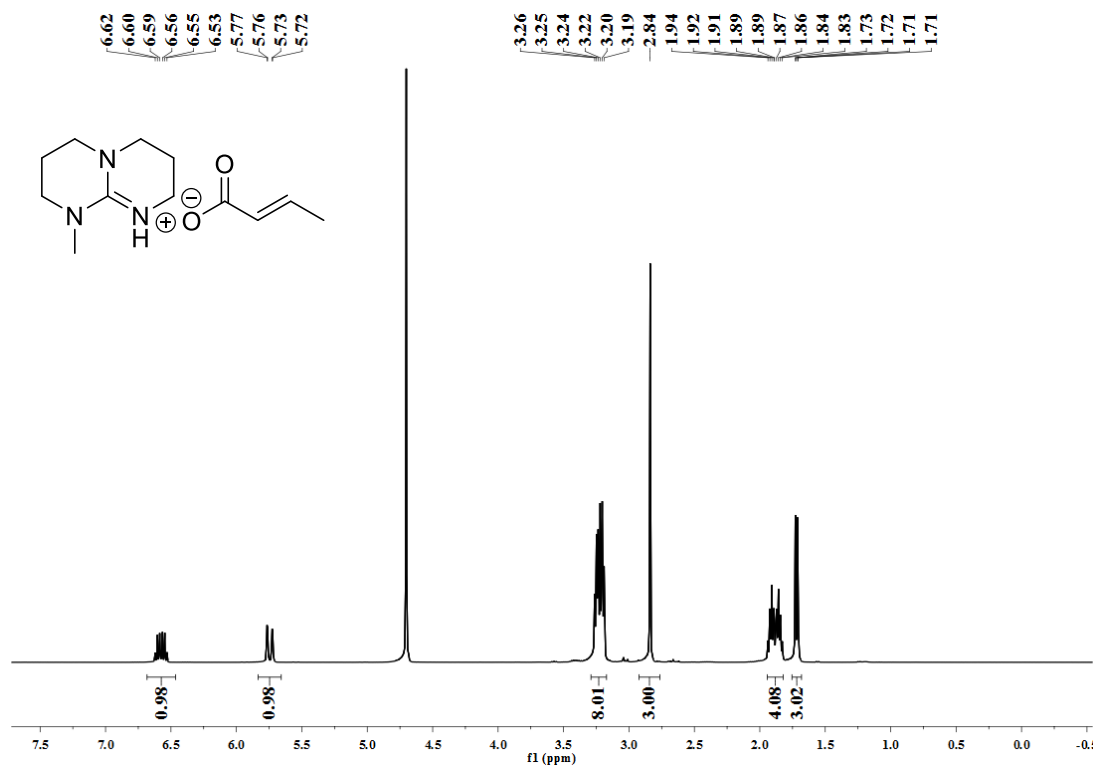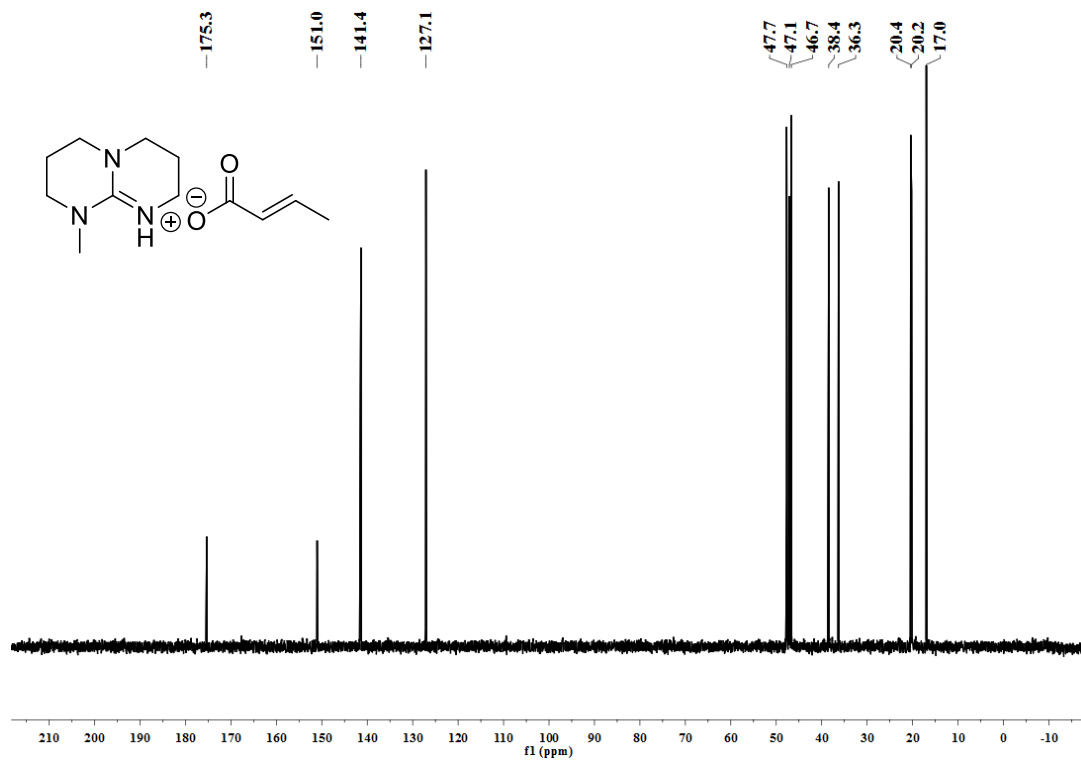

A3-B10: [MTBD][TFA]

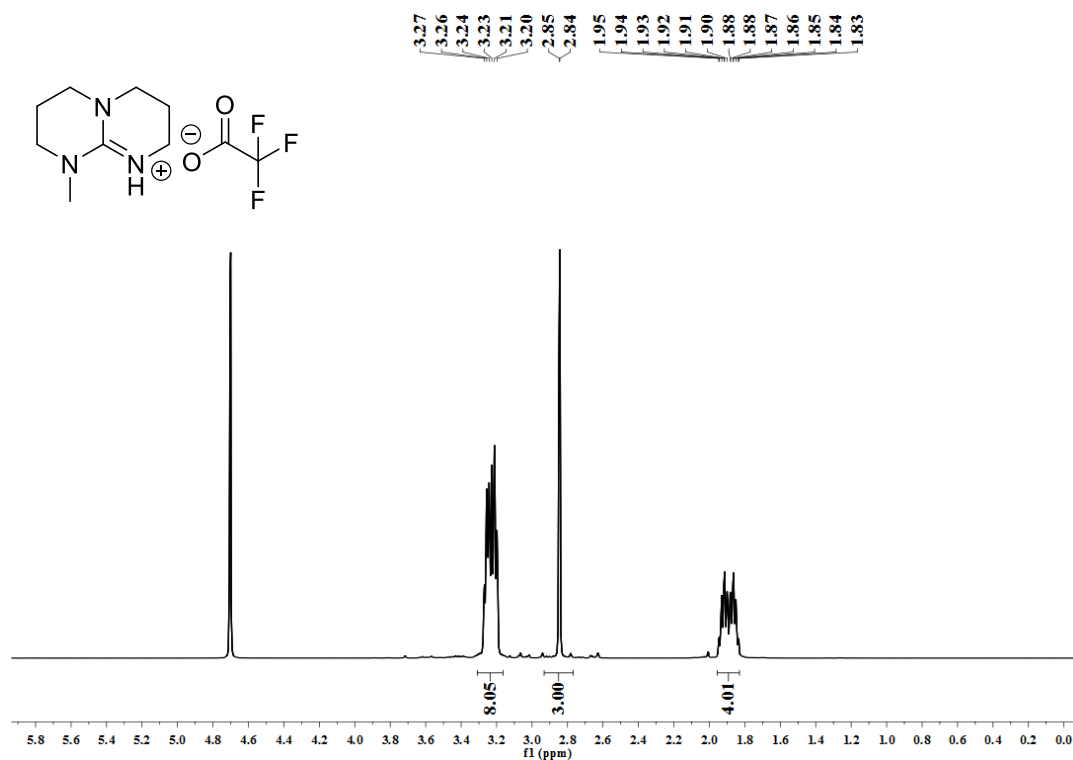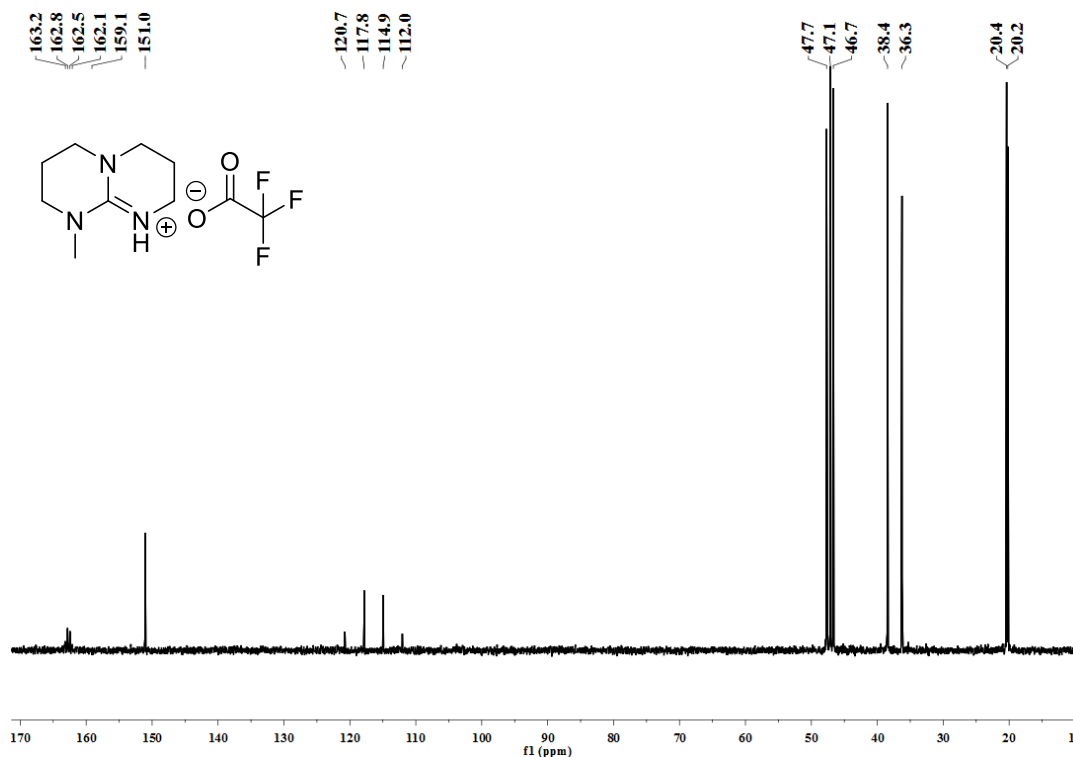

A3-B11: [MTBD][H<sub>2</sub>PO<sub>4</sub>]

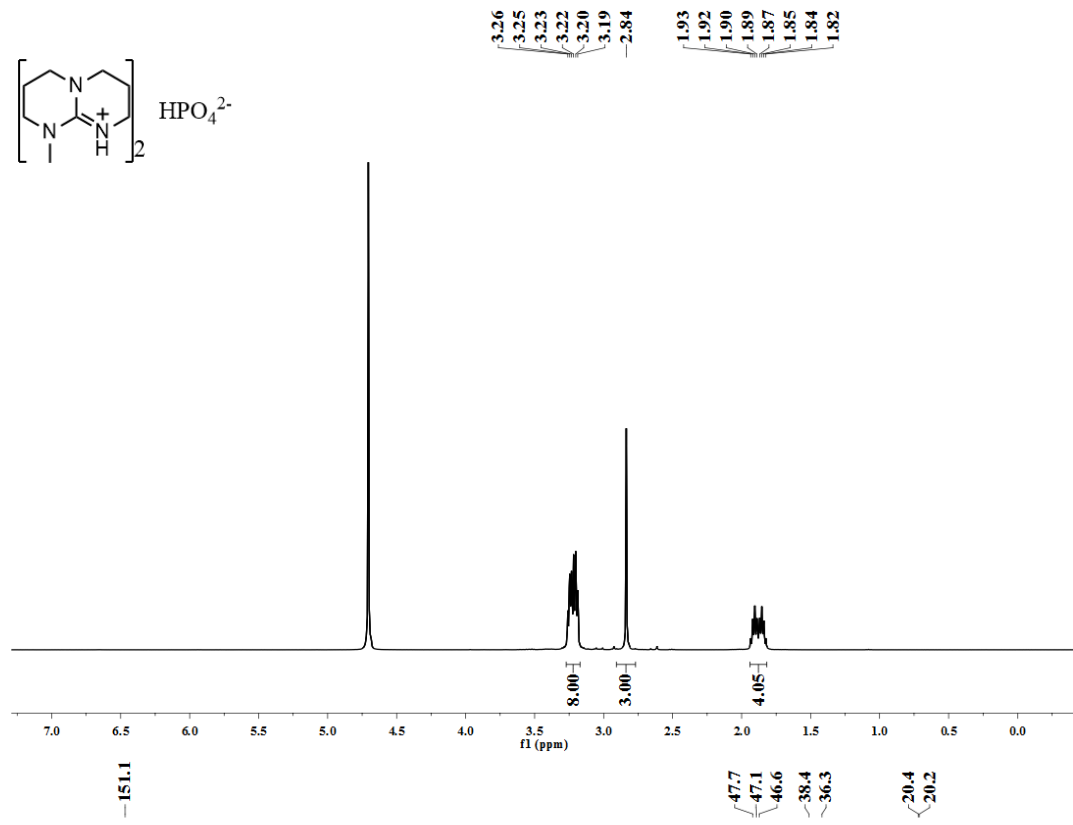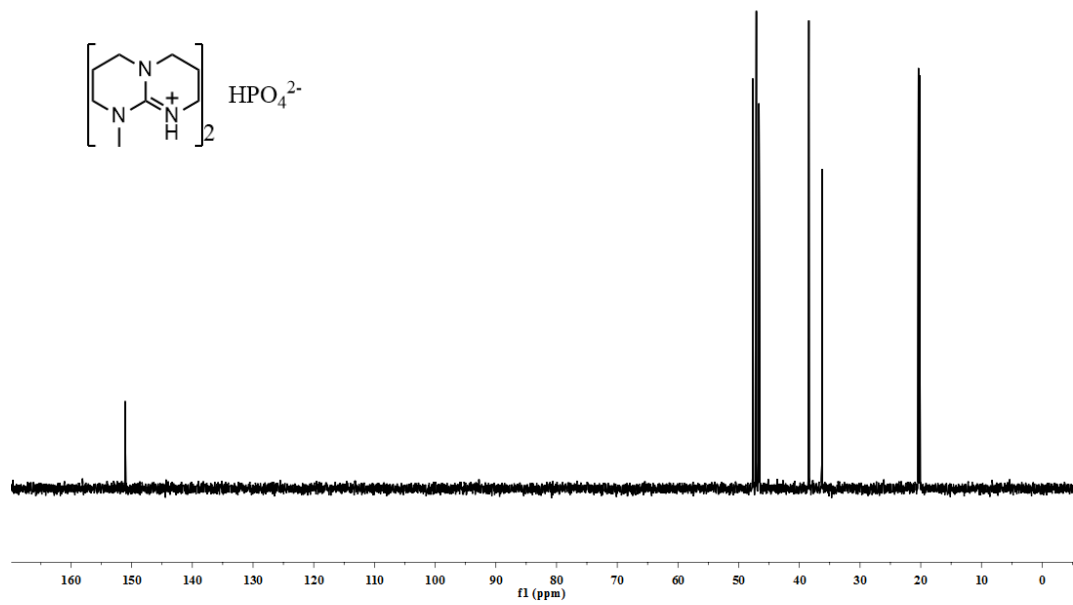

A3-B12: [MTBD][H<sub>2</sub>PO<sub>4</sub>]

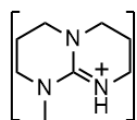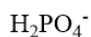

3.25  
3.23  
3.22  
3.20  
3.19  
3.17  
2.82  
1.91  
1.89  
1.88  
1.87  
1.86  
1.85  
1.84  
1.82  
1.80

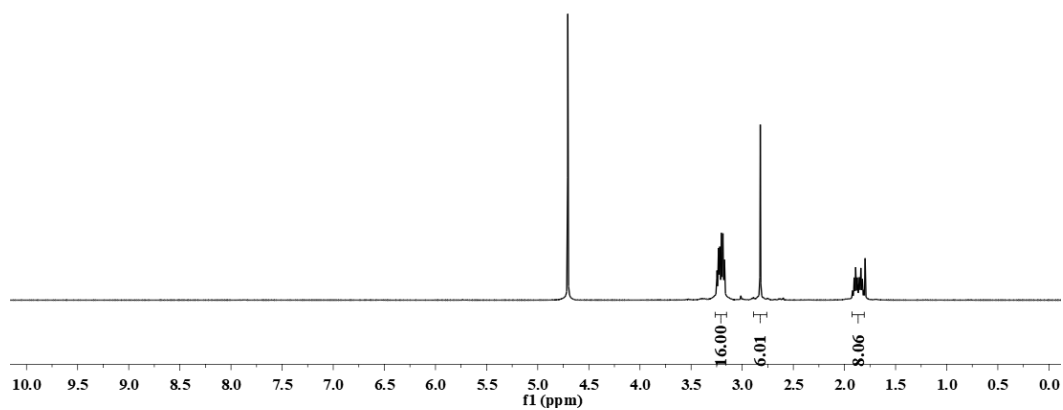

151.1

47.7  
47.1  
46.7  
38.4  
36.3  
20.4  
20.2

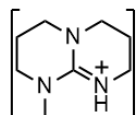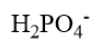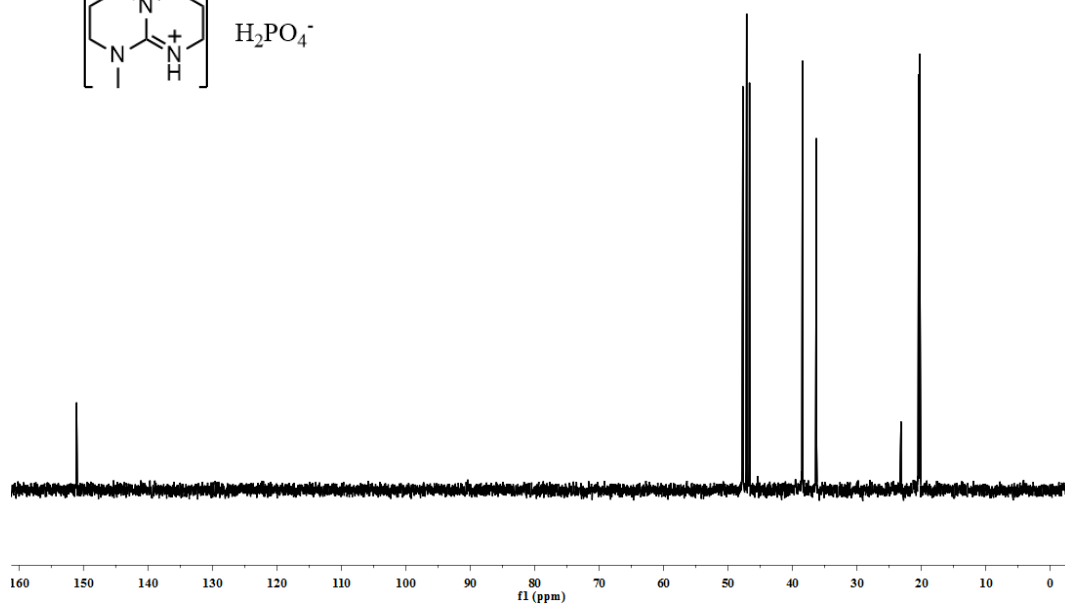

A4-B1: [TBD][Ac]

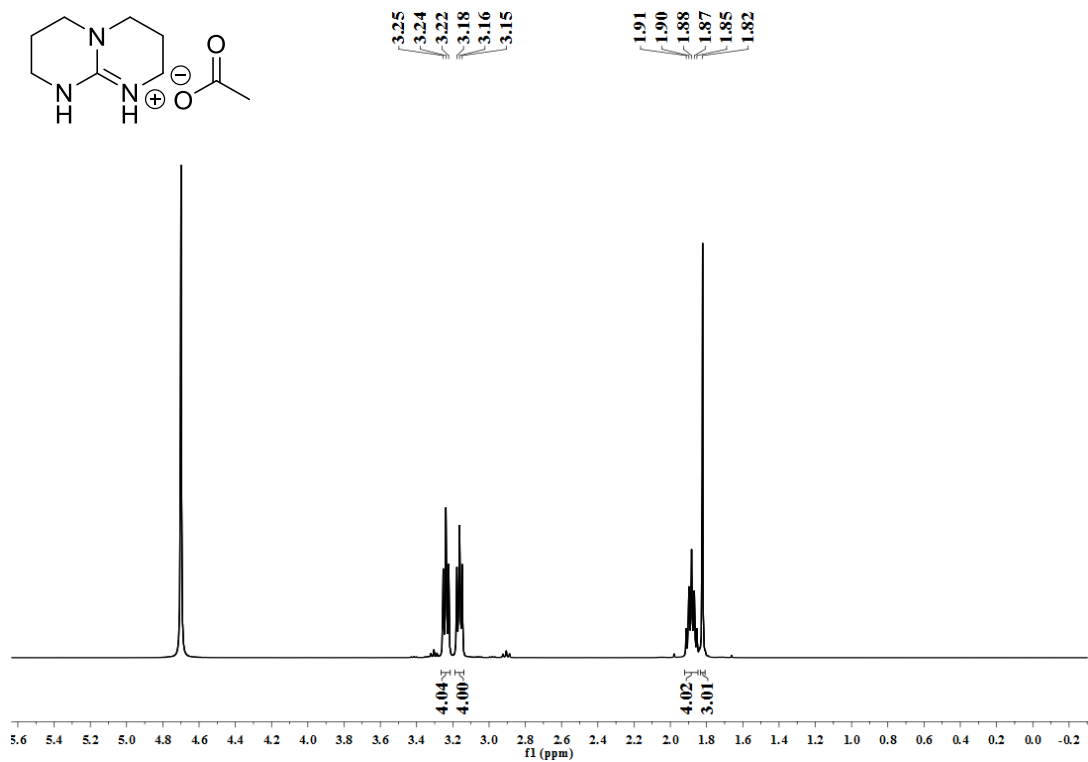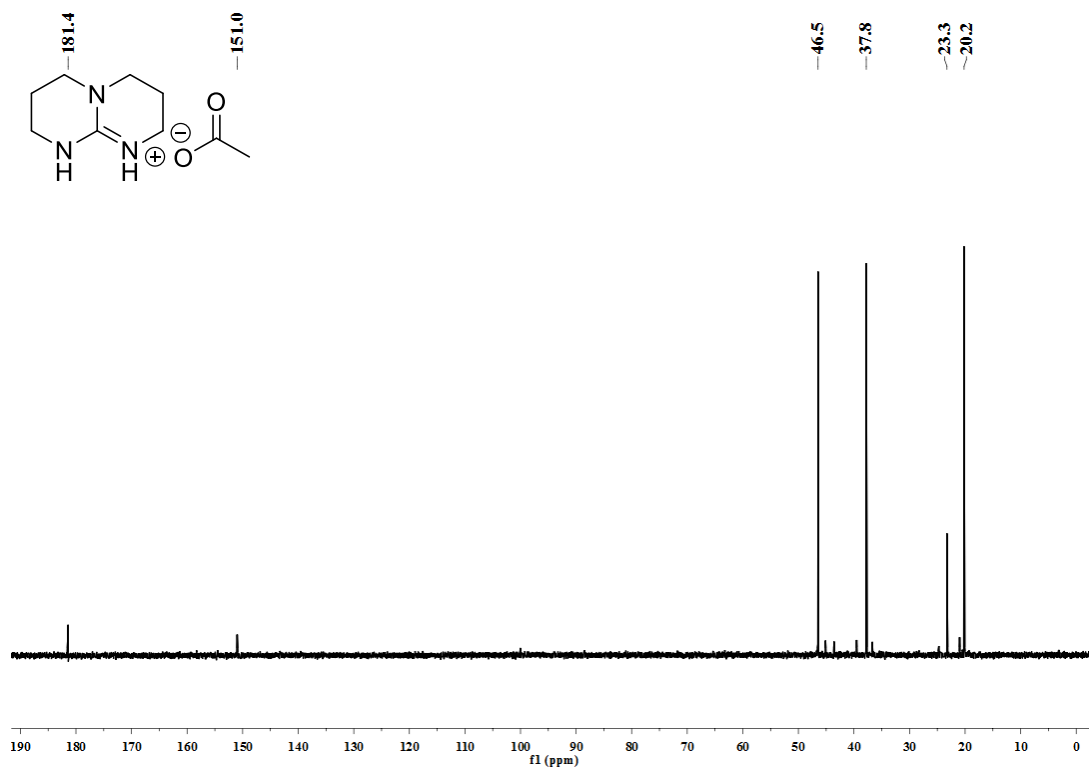

A4-B2: [TBD][Pro]

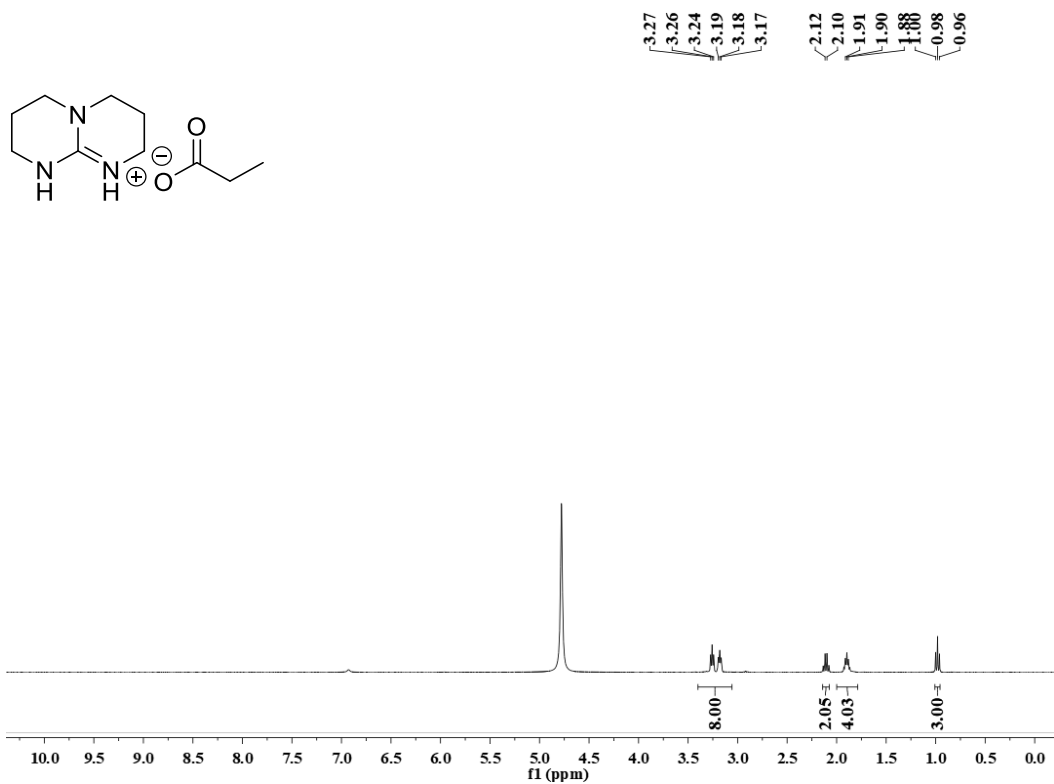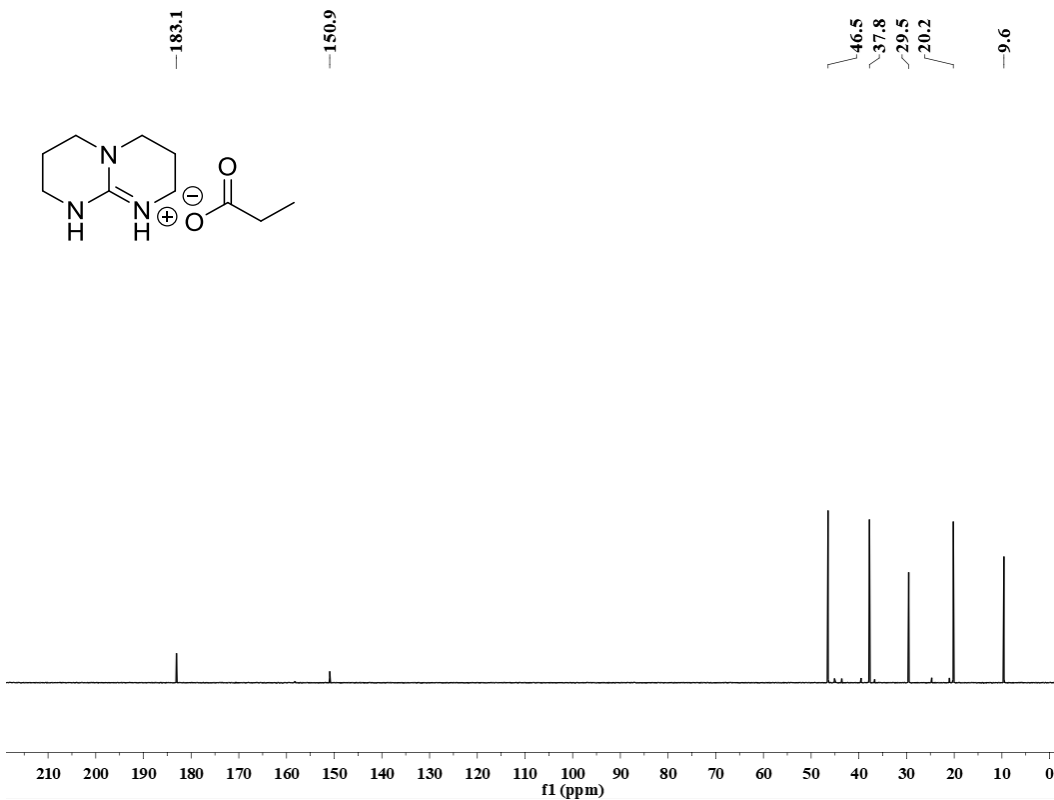



A4-B3: [TBD][But]

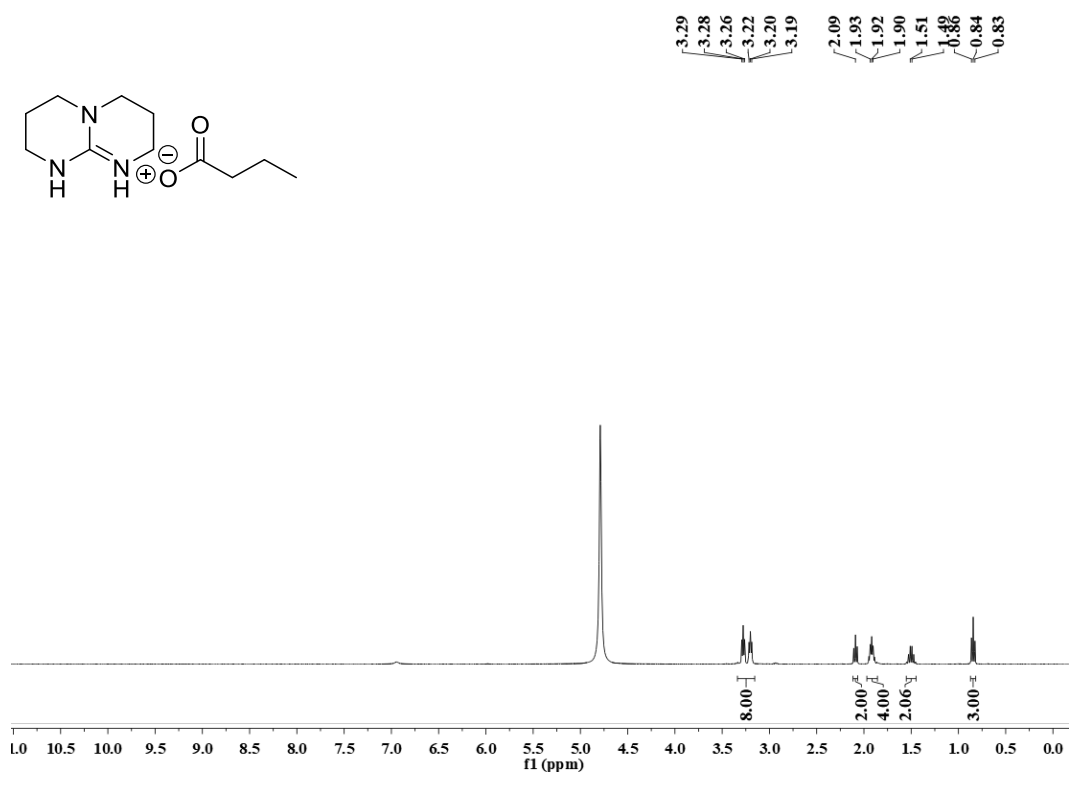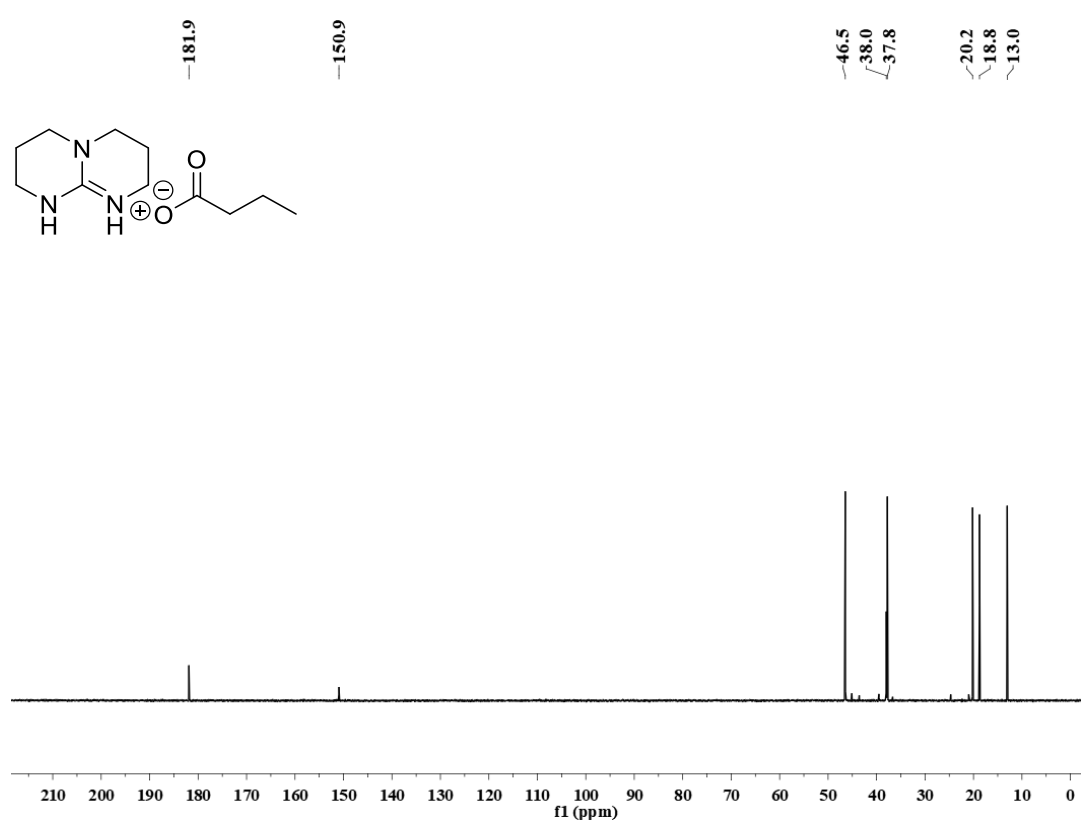

A4-B4: [TBD][Val]

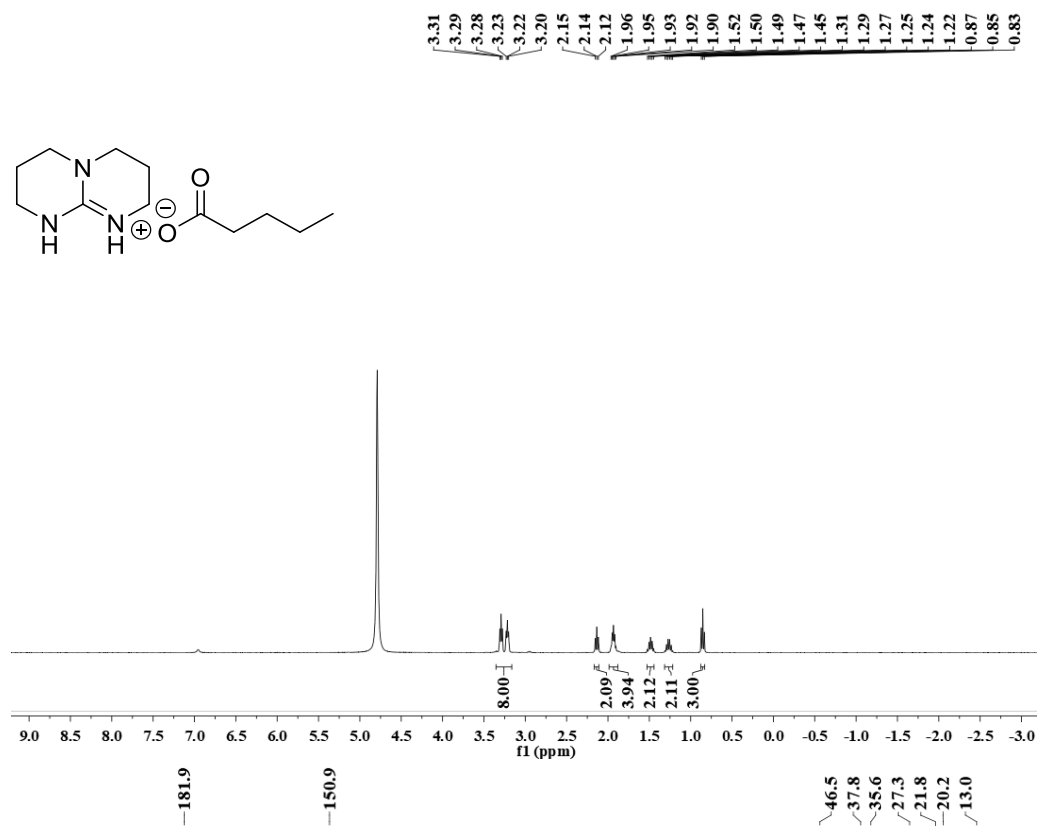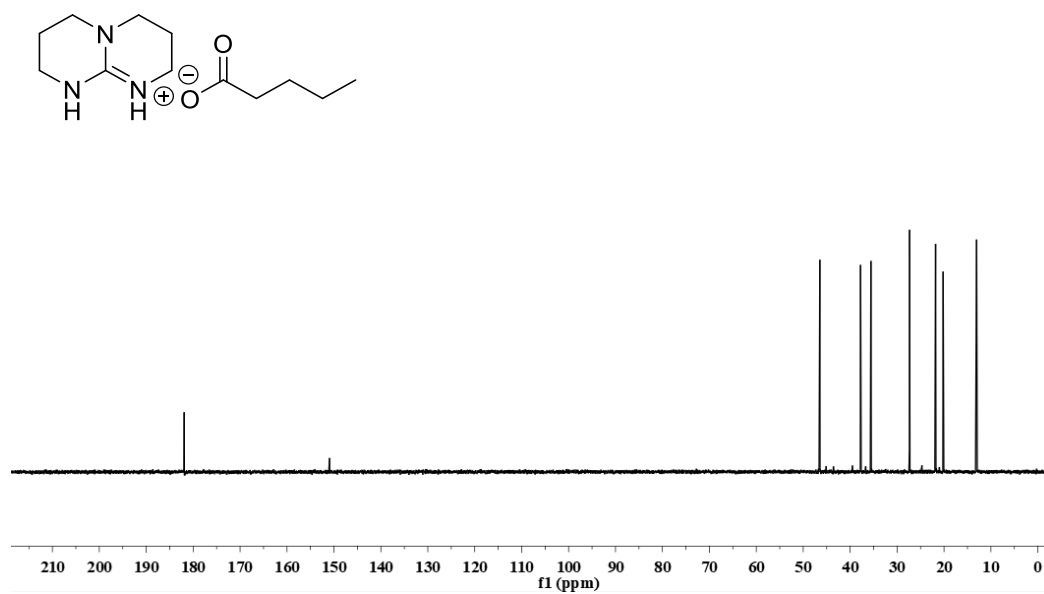

A4-B5: [TBD][Ben]

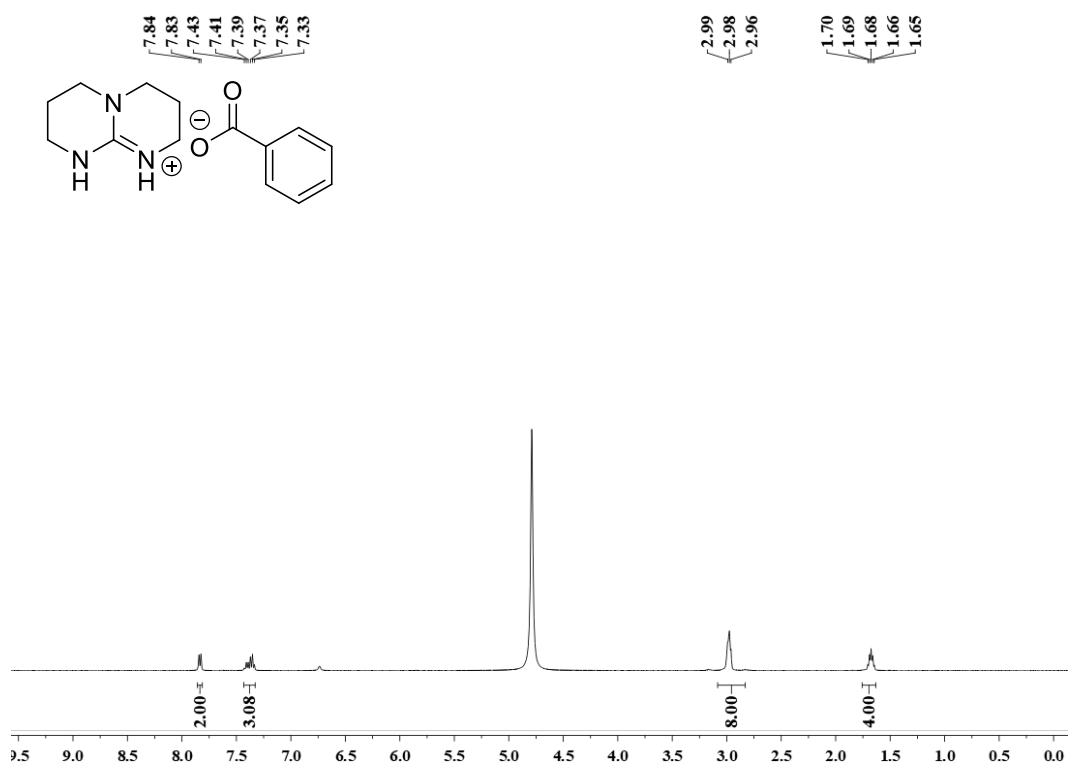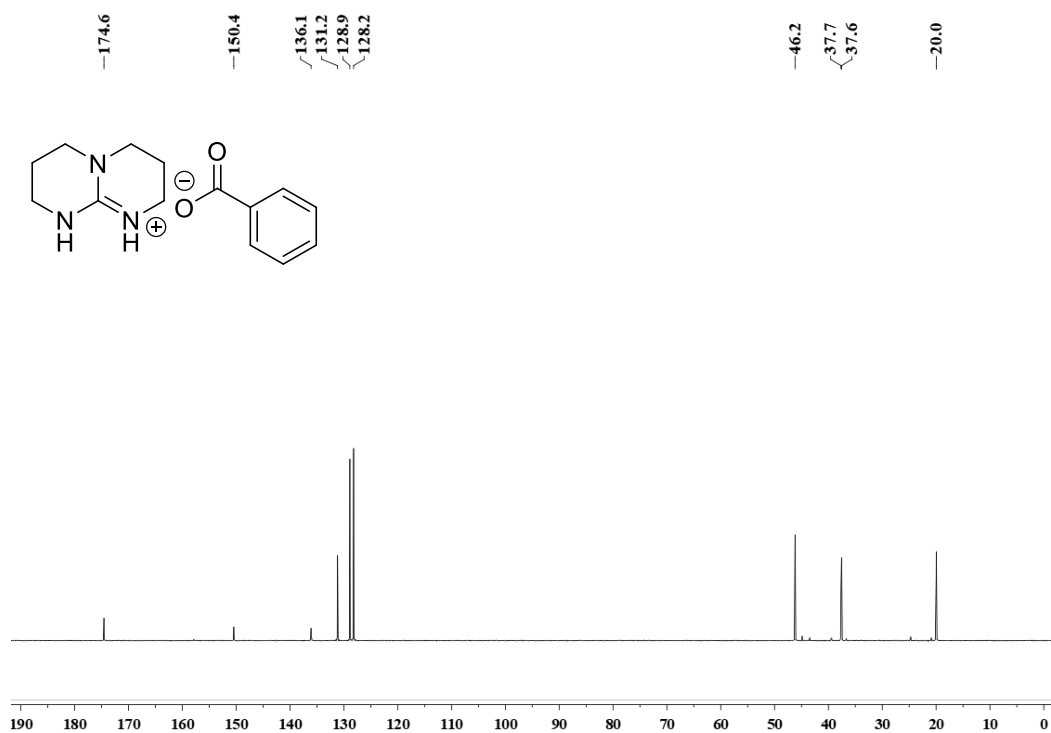

A4-B6: [TBD][Ani]

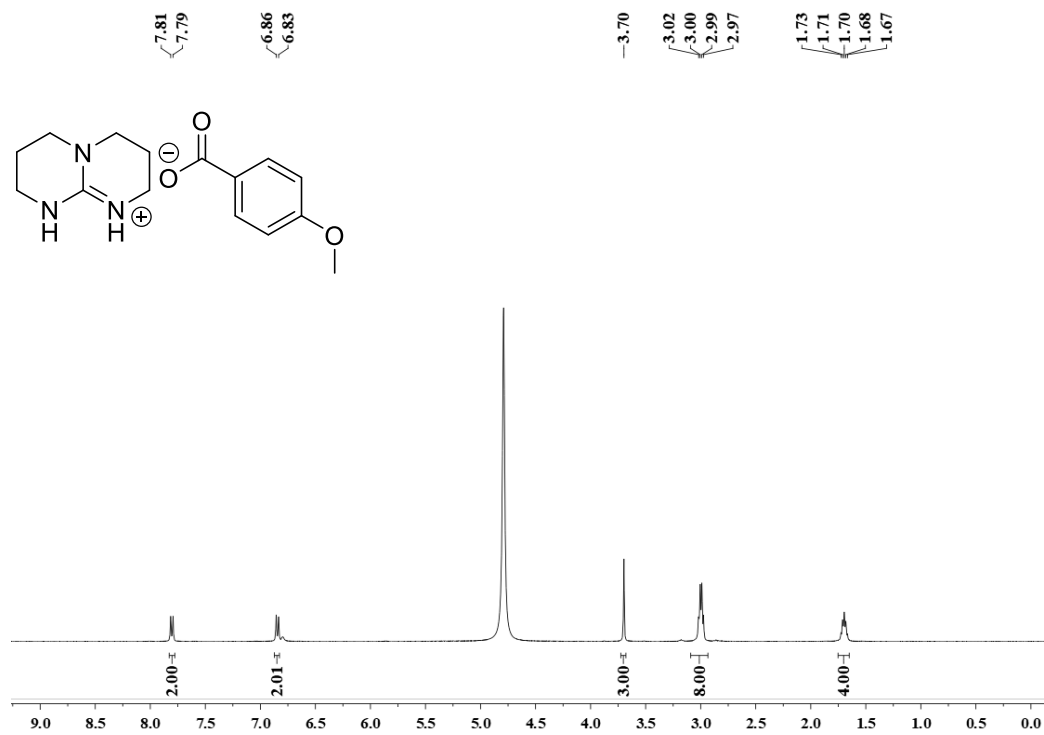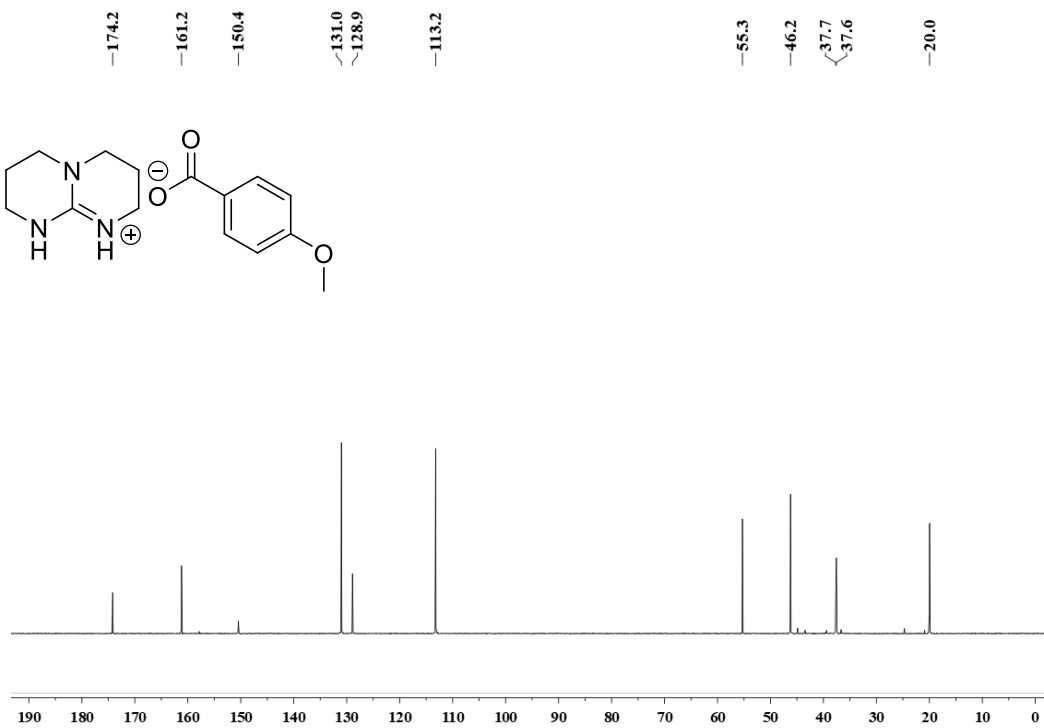

A4-B7: [TBD][Gly]

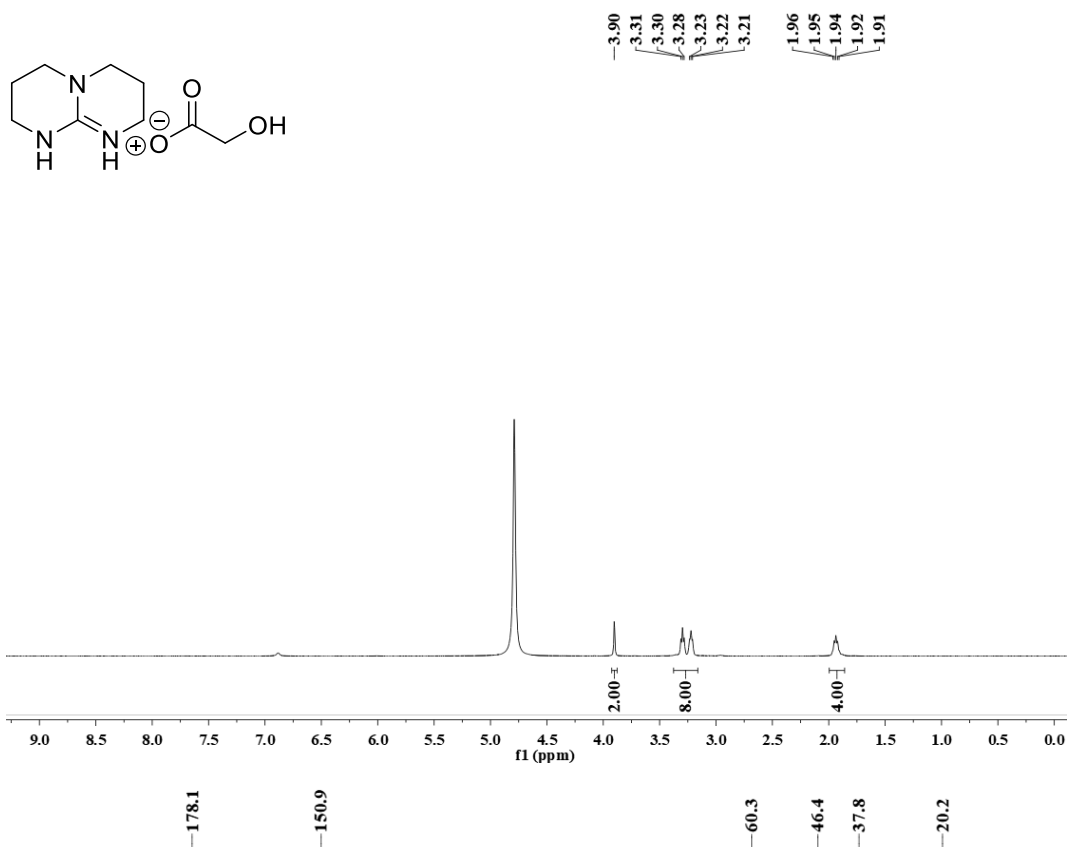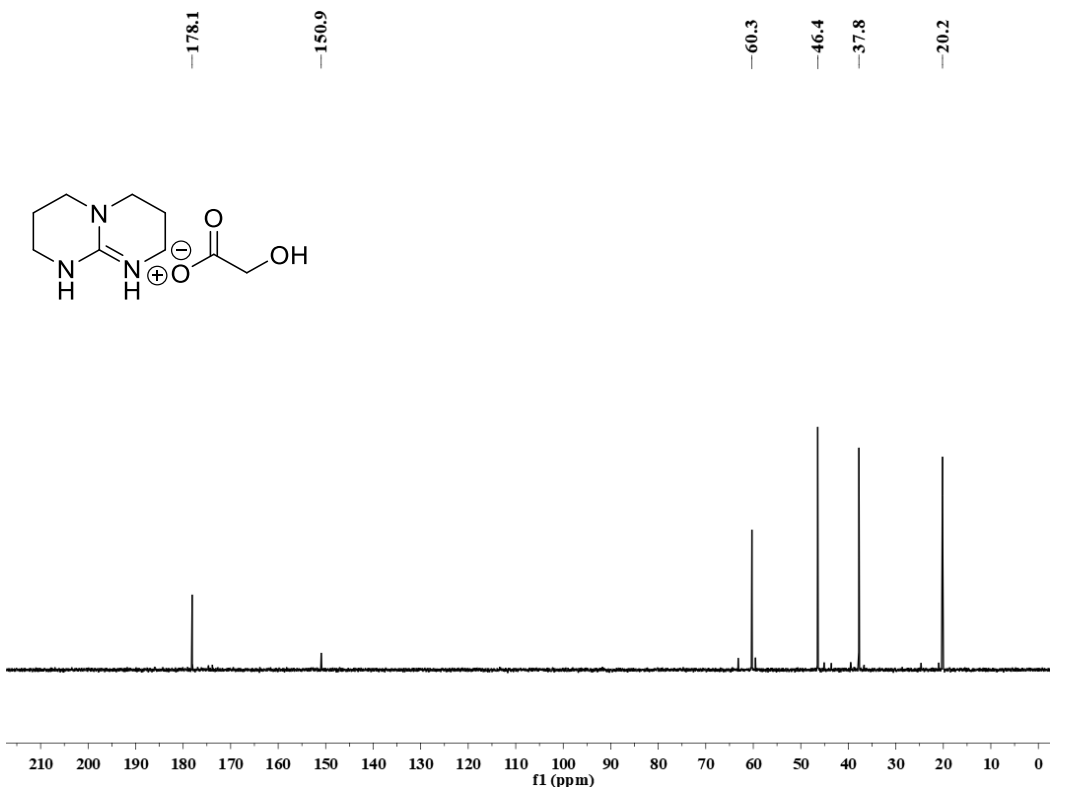

A4-B8: [TBD][Lac]

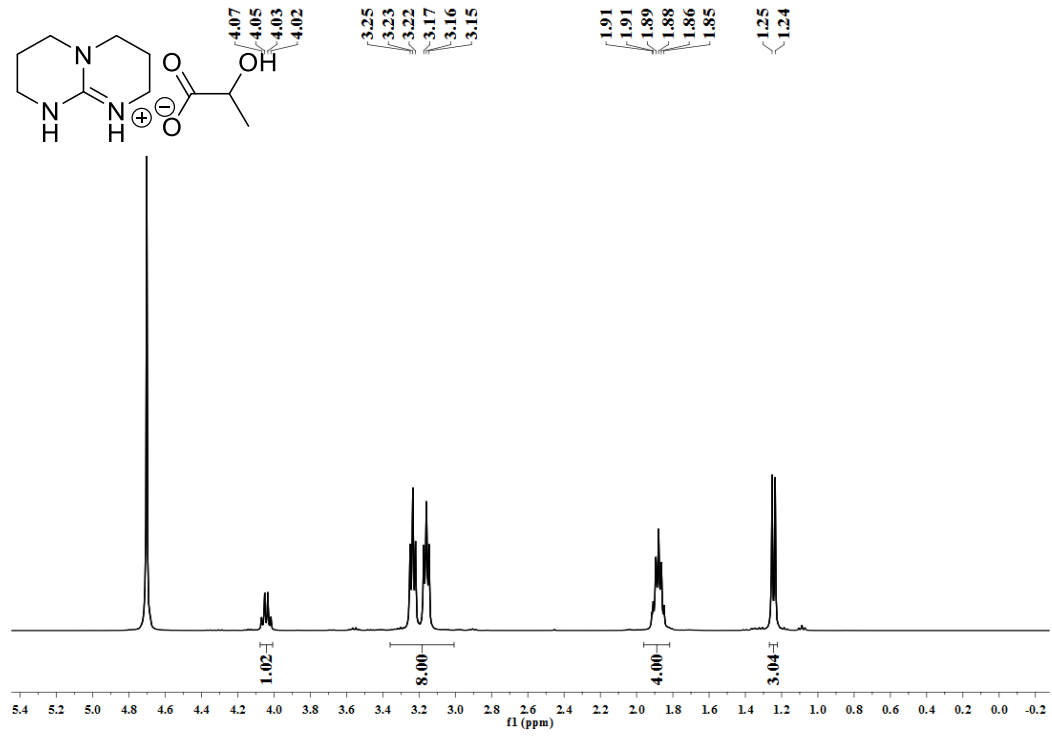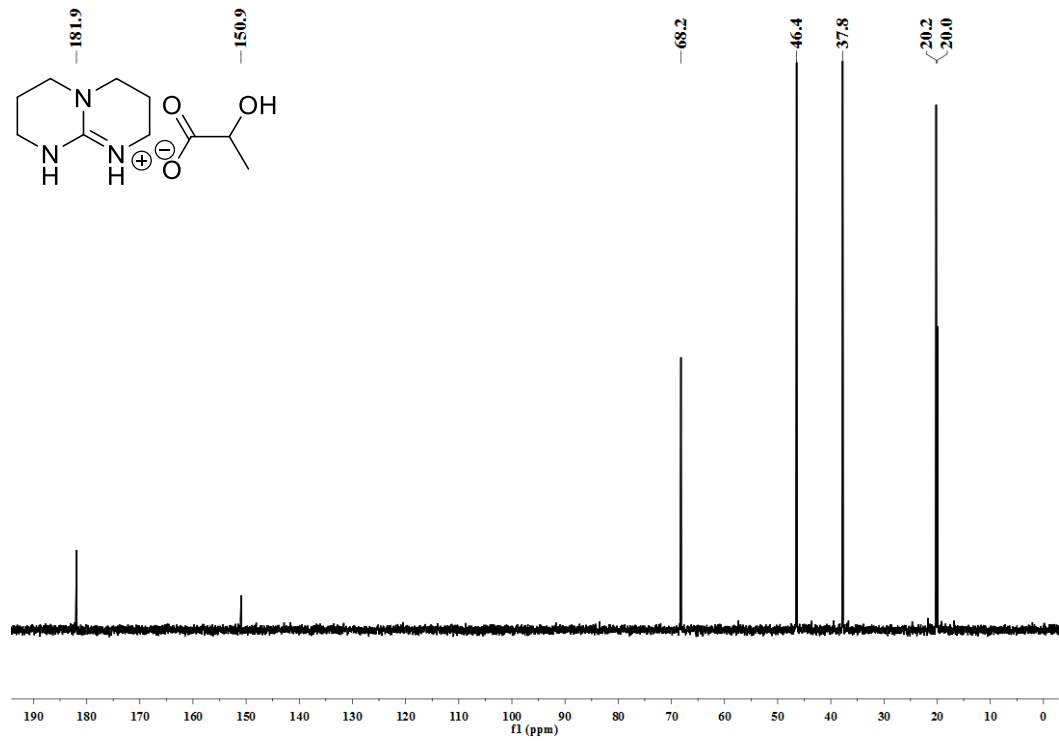

A4-B9: [TBD][Cro]

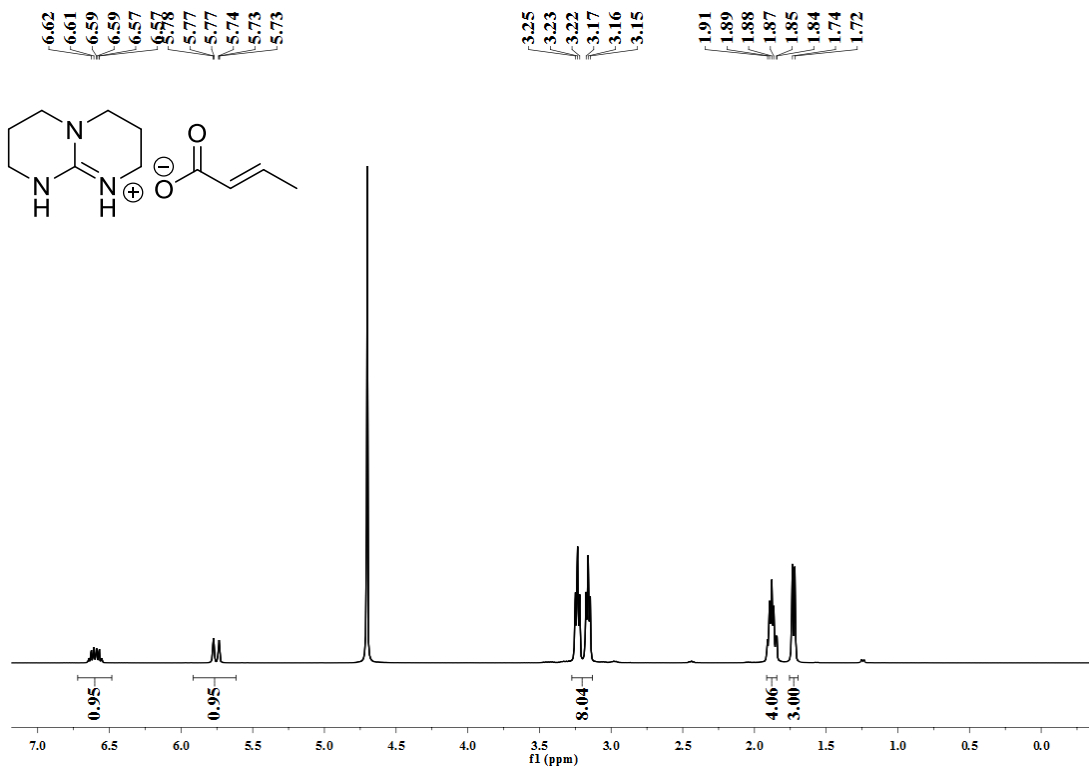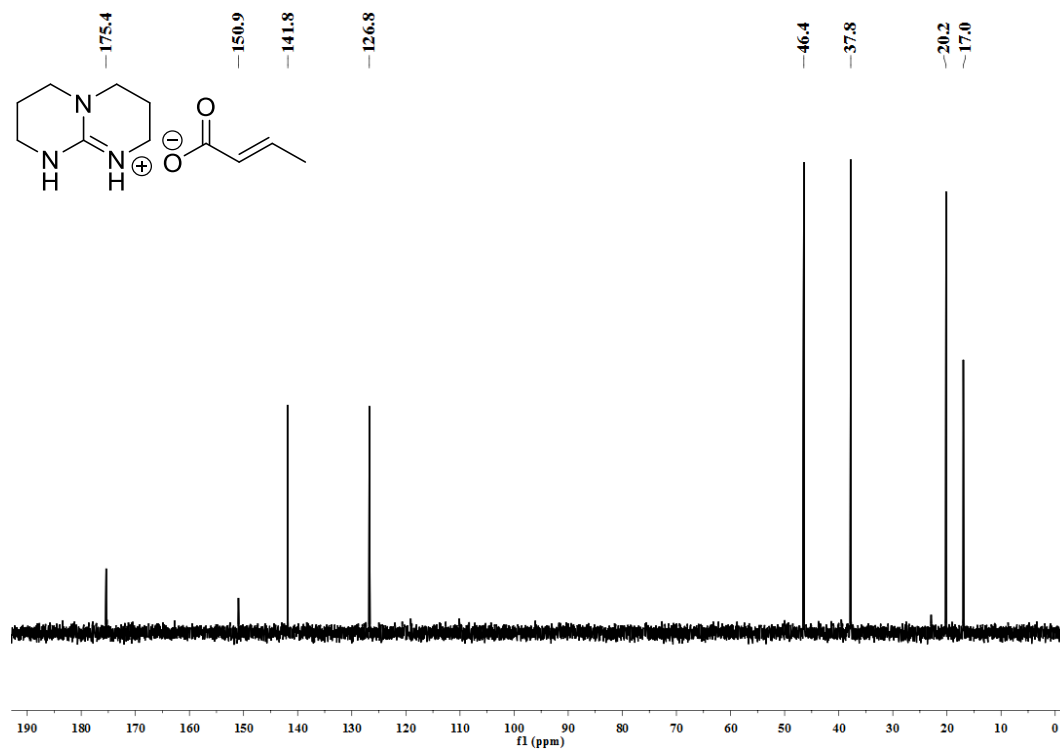

A4-B10: [TBD][TFA]

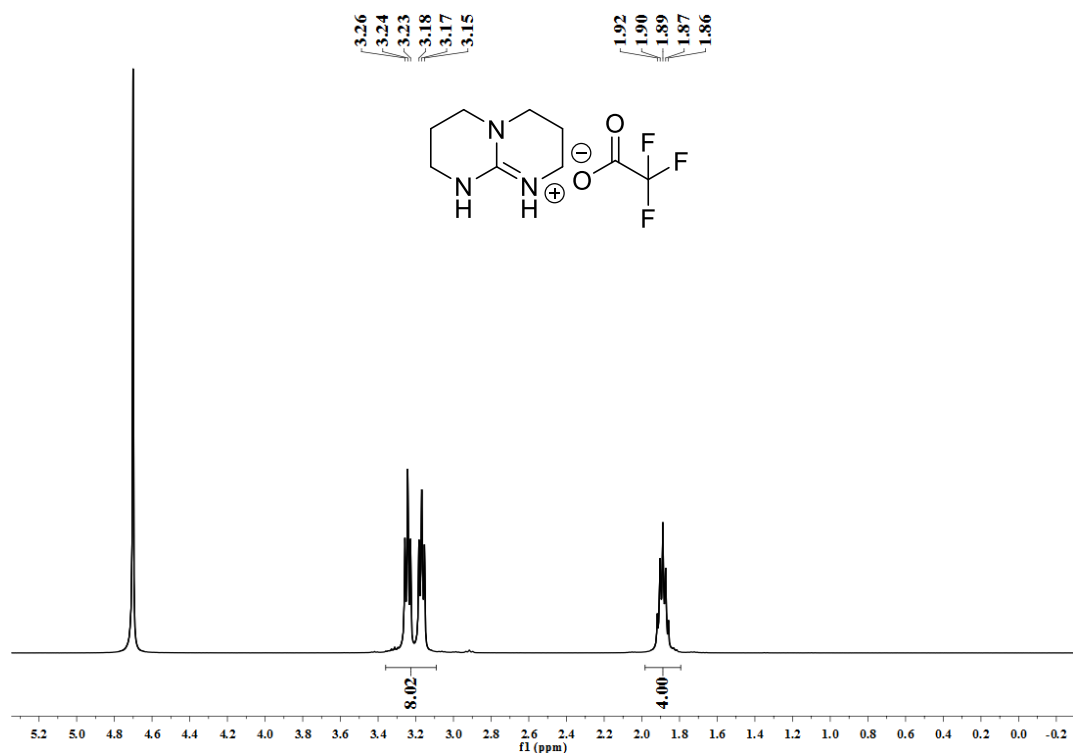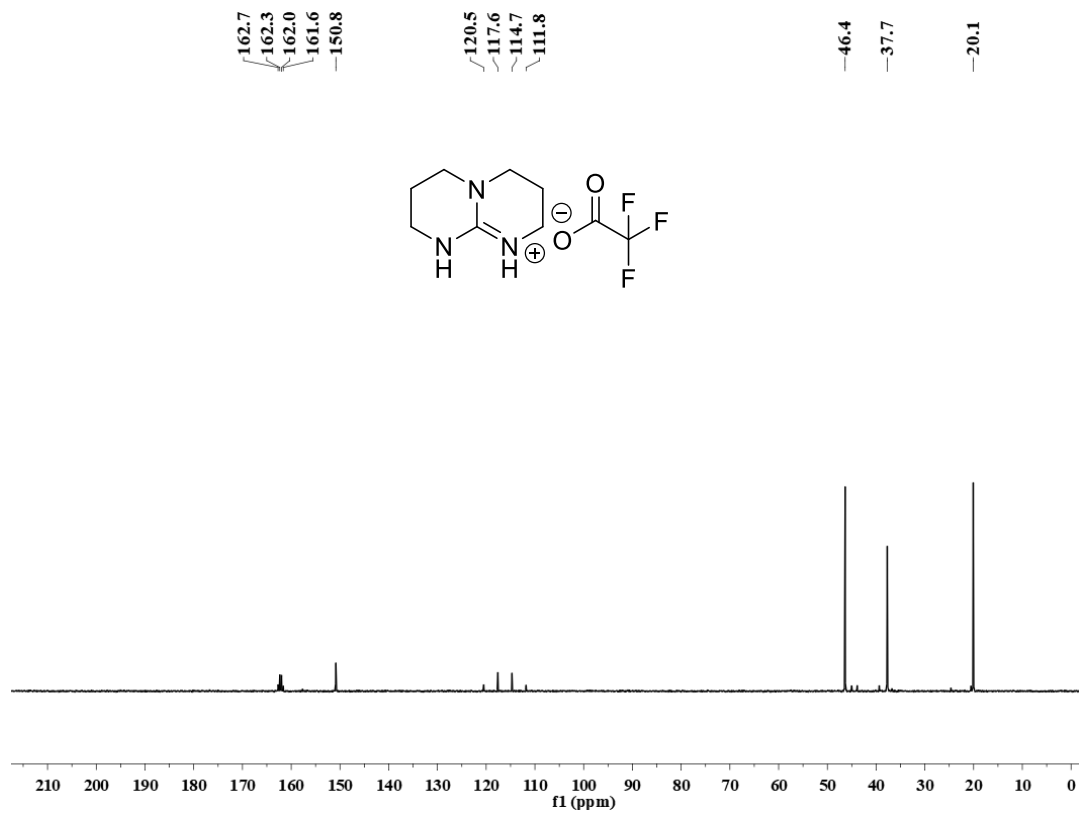



A4-B11: [TBD][H<sub>2</sub>PO<sub>4</sub>]

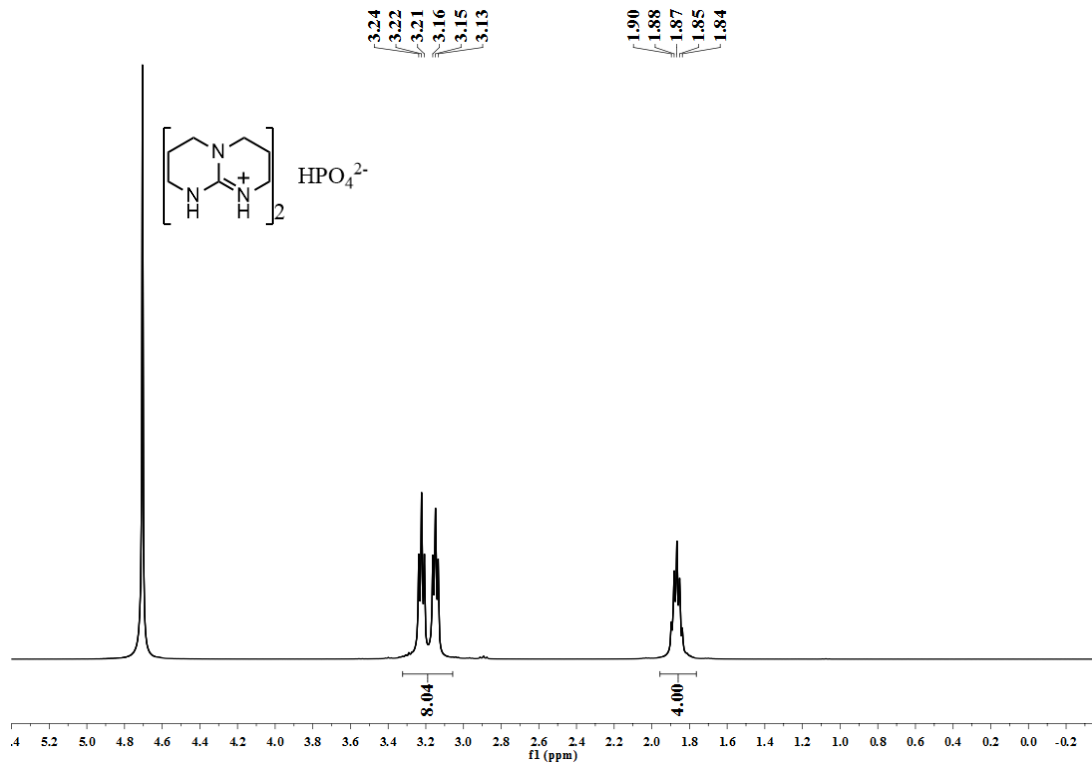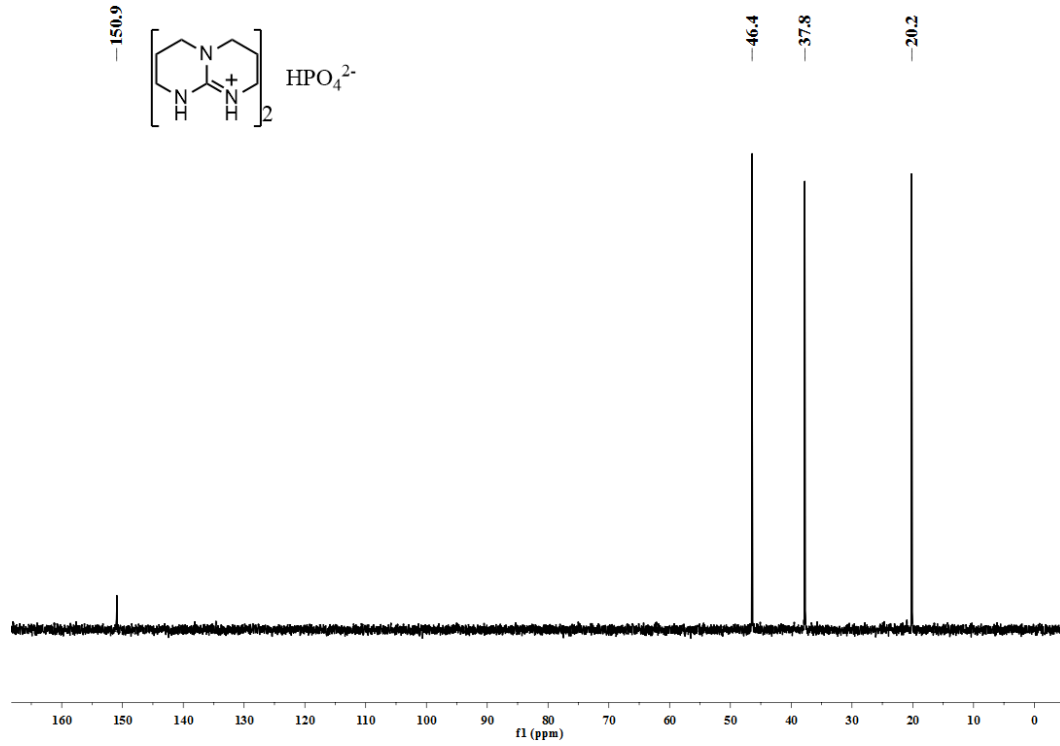

A4-B12: [TBD][H<sub>2</sub>PO<sub>4</sub>]

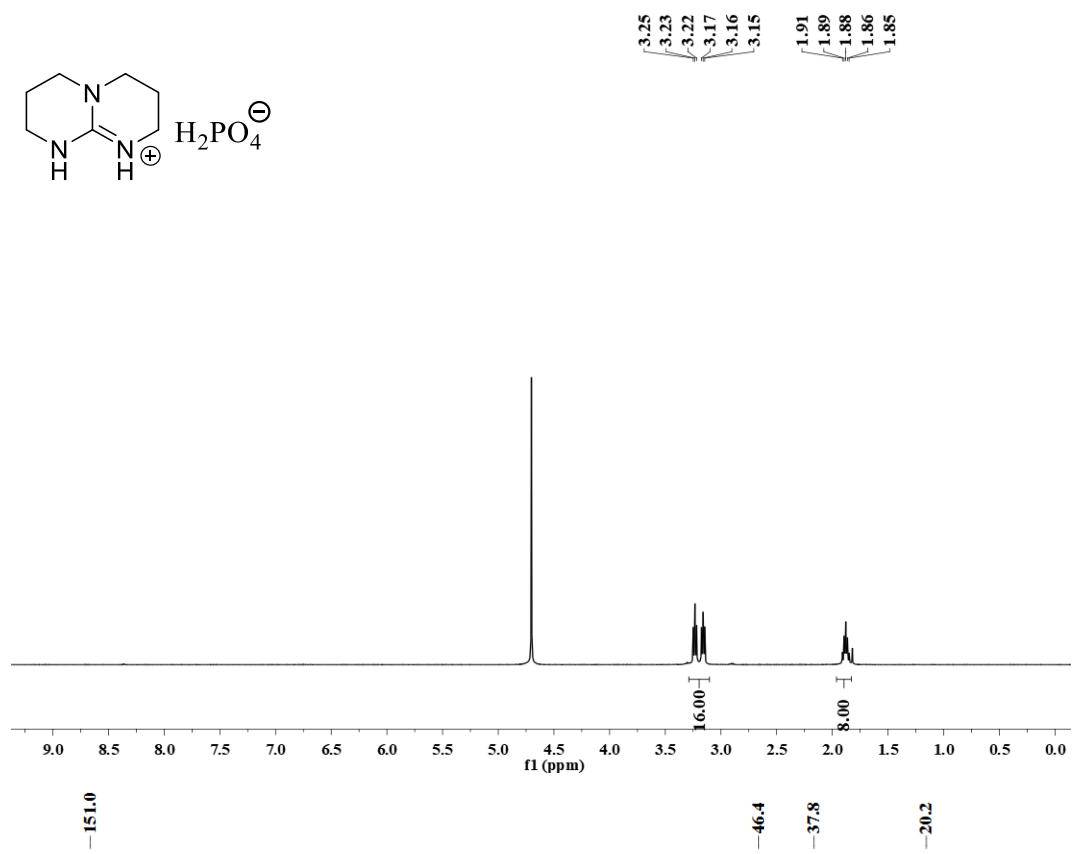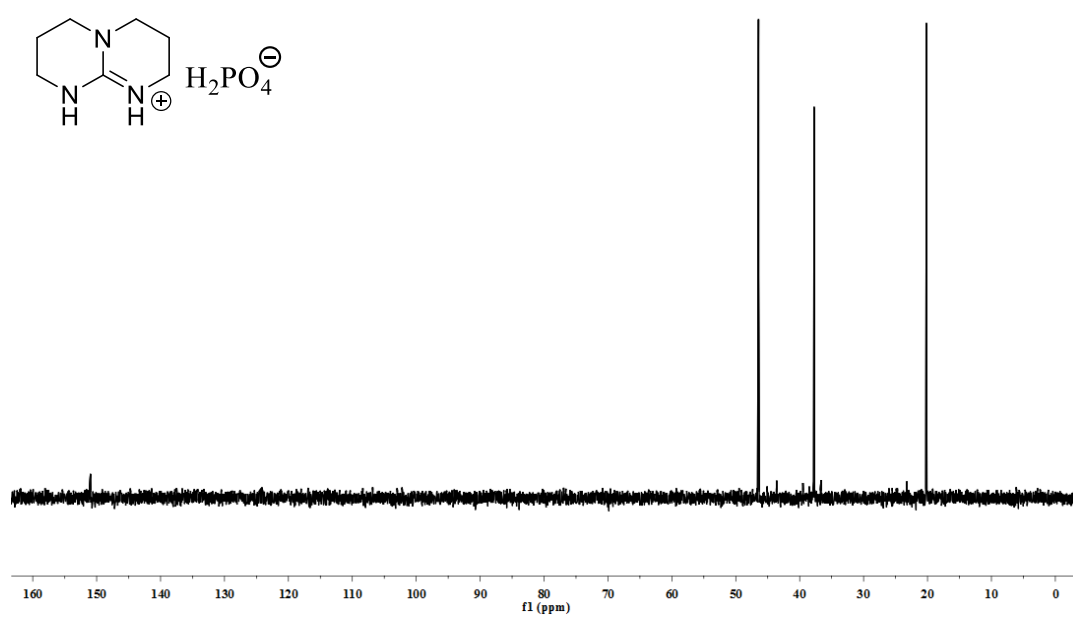

A5-B1: [DMAP][Ac]

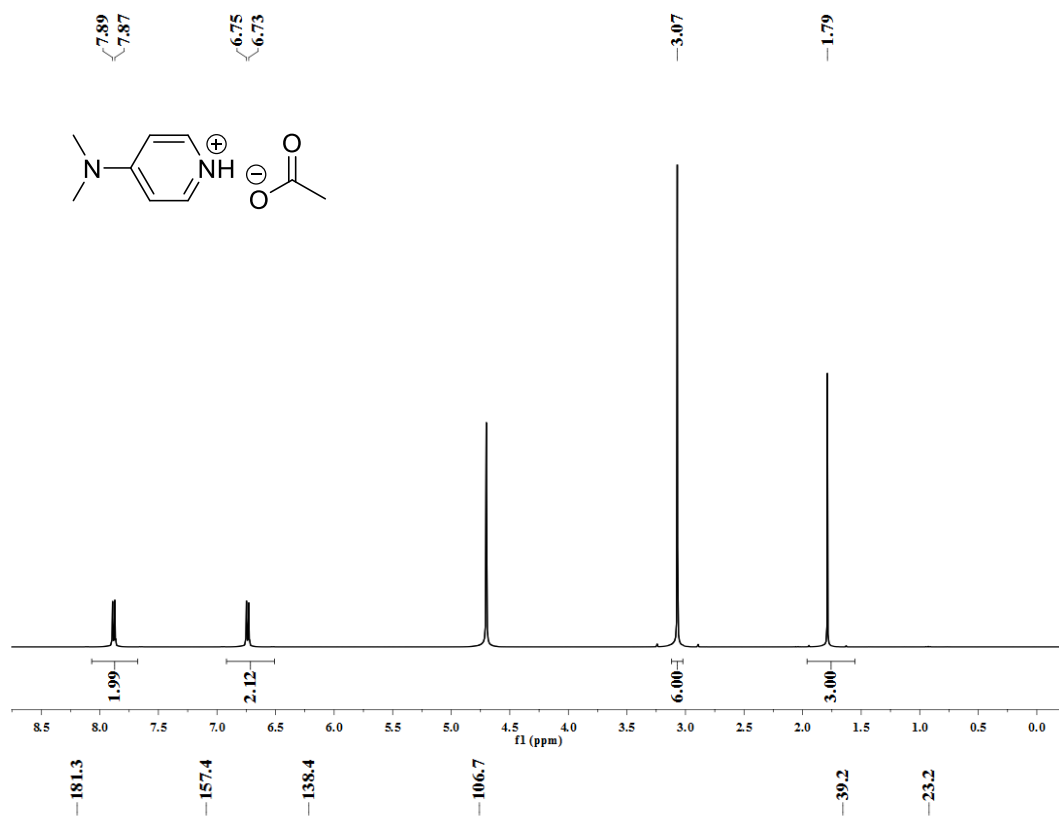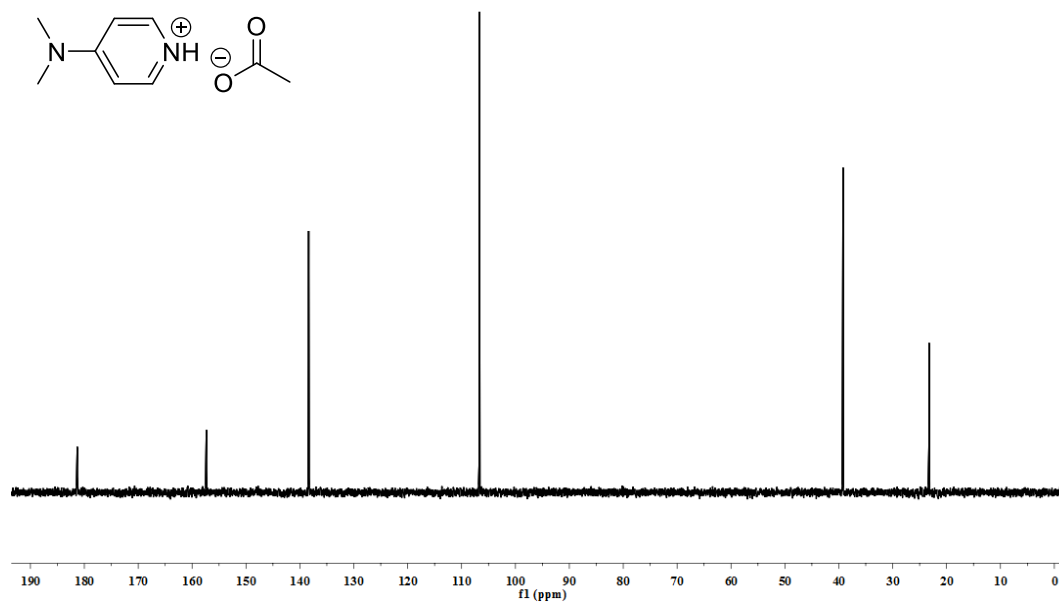

A5-B2: [DMAP][Pro]

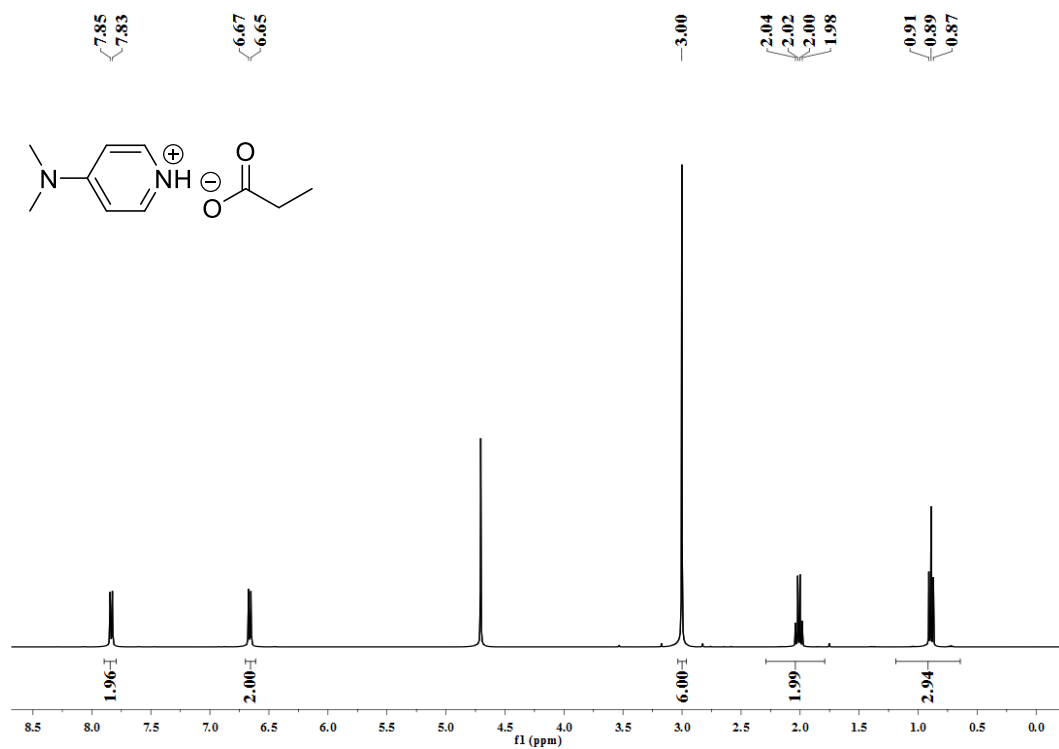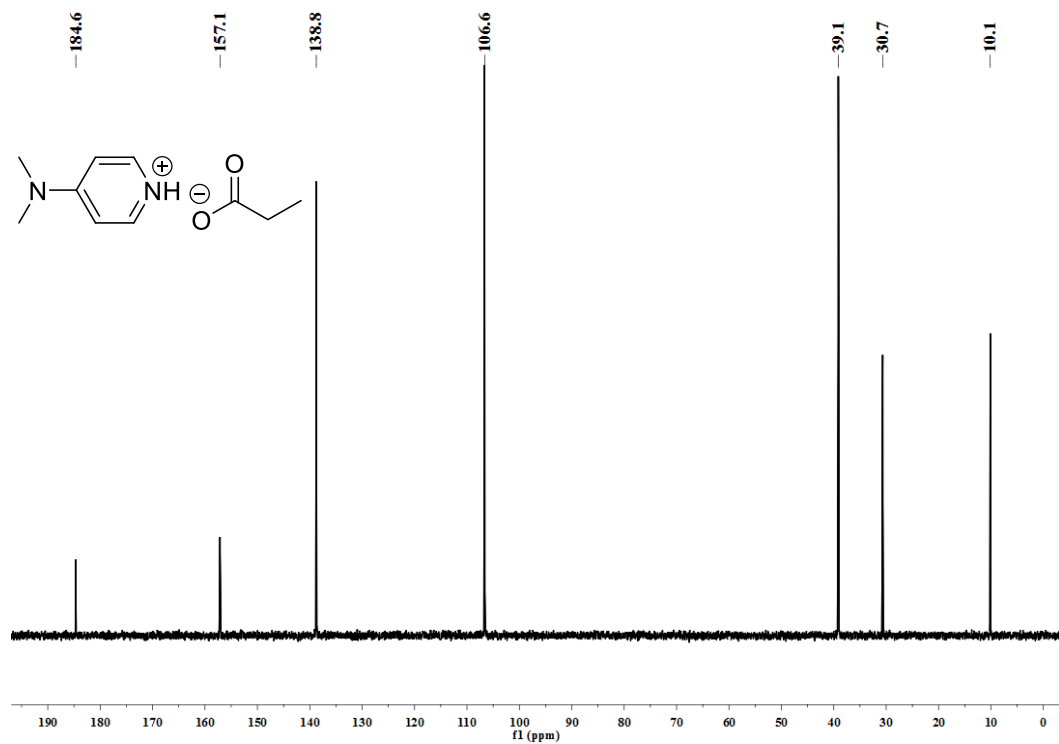

A5-B3: [DMAP][But]

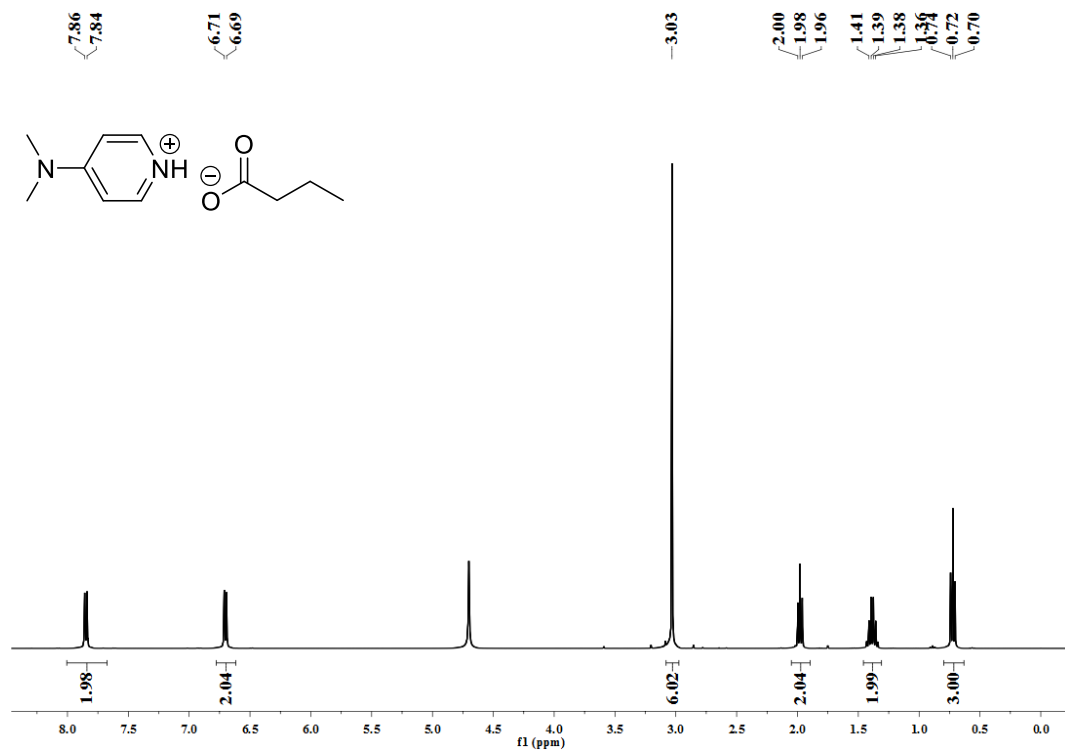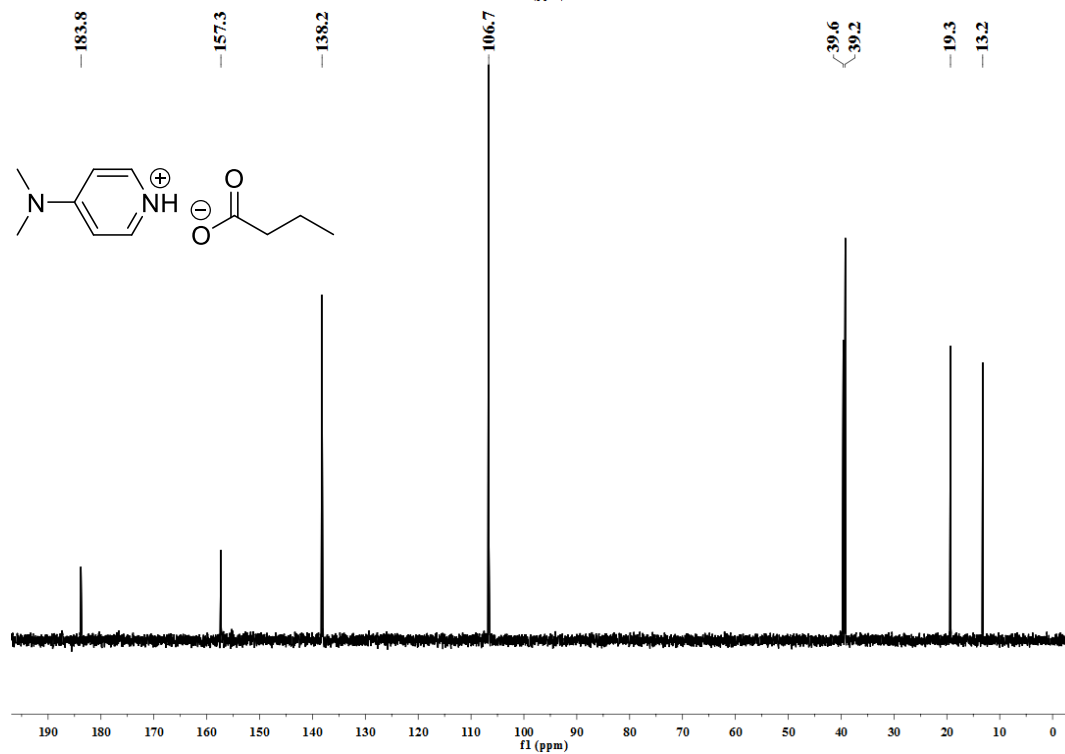

A5-B4: [DMAP][Val]

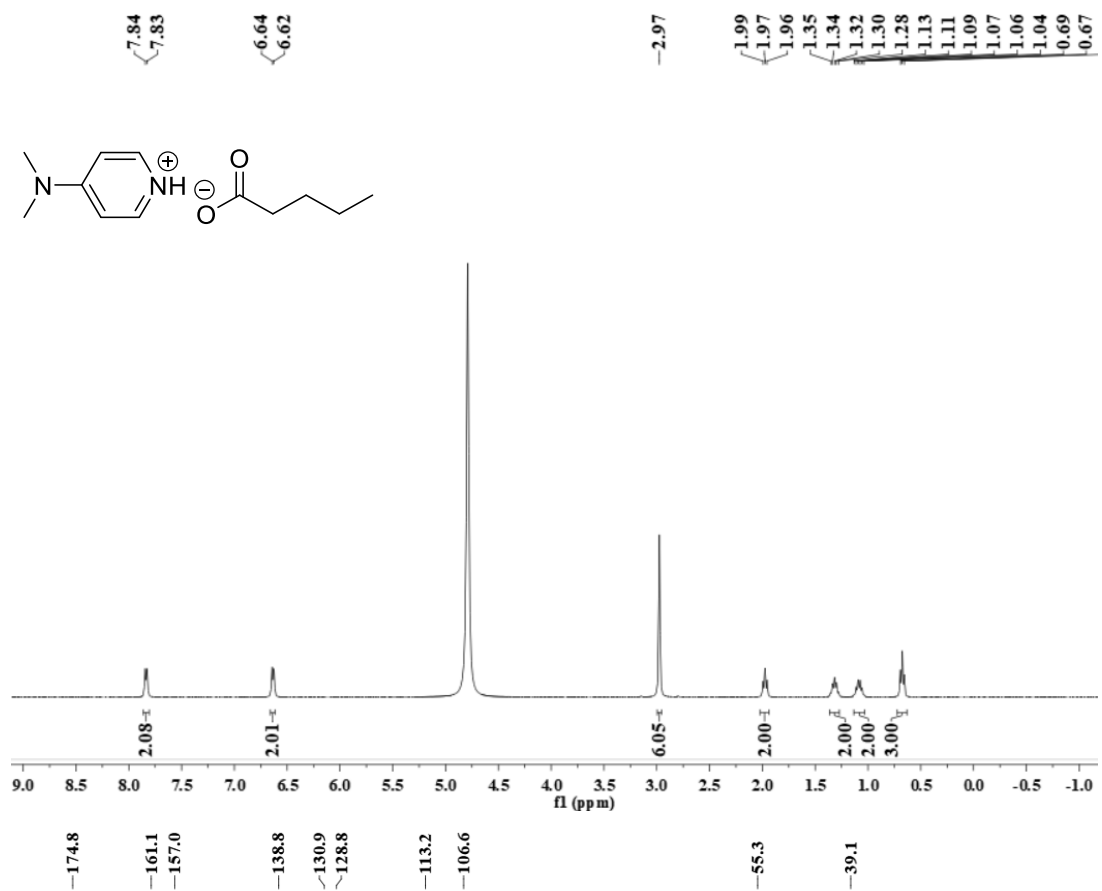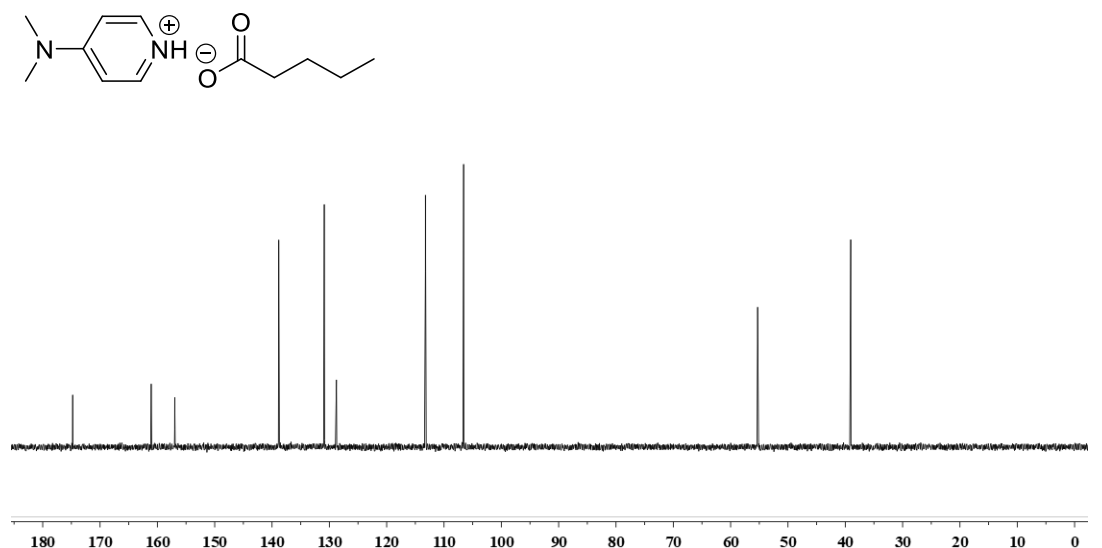

A5-B5: [DMAP][Ben]

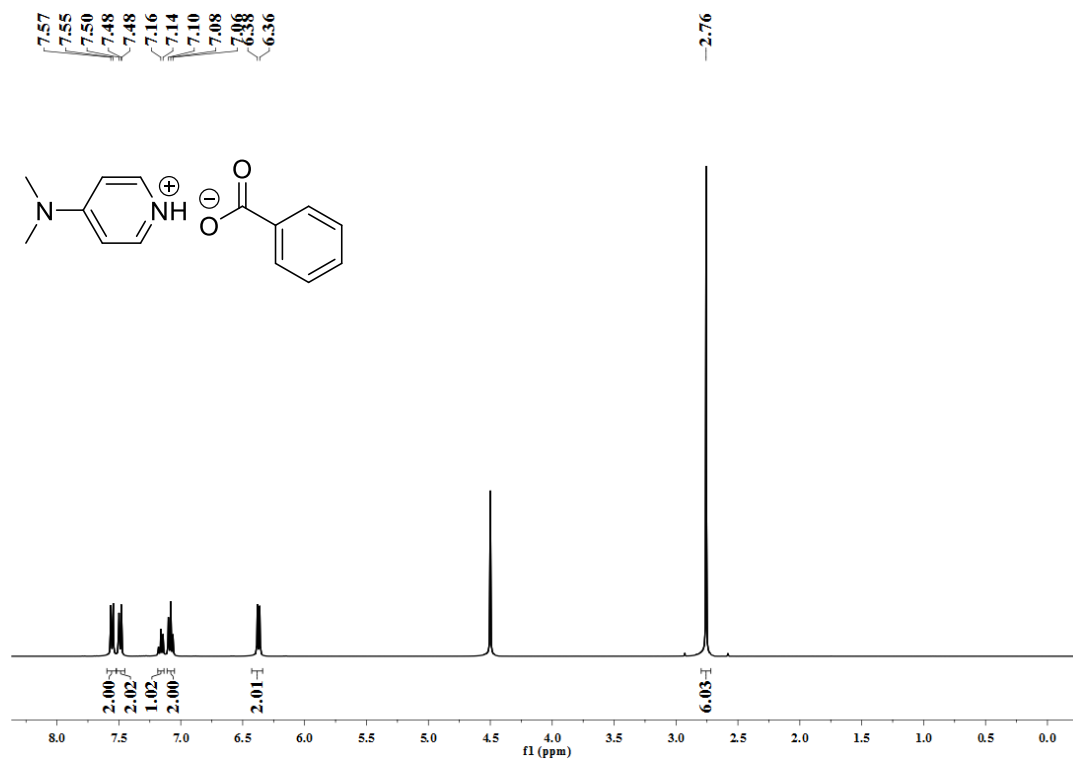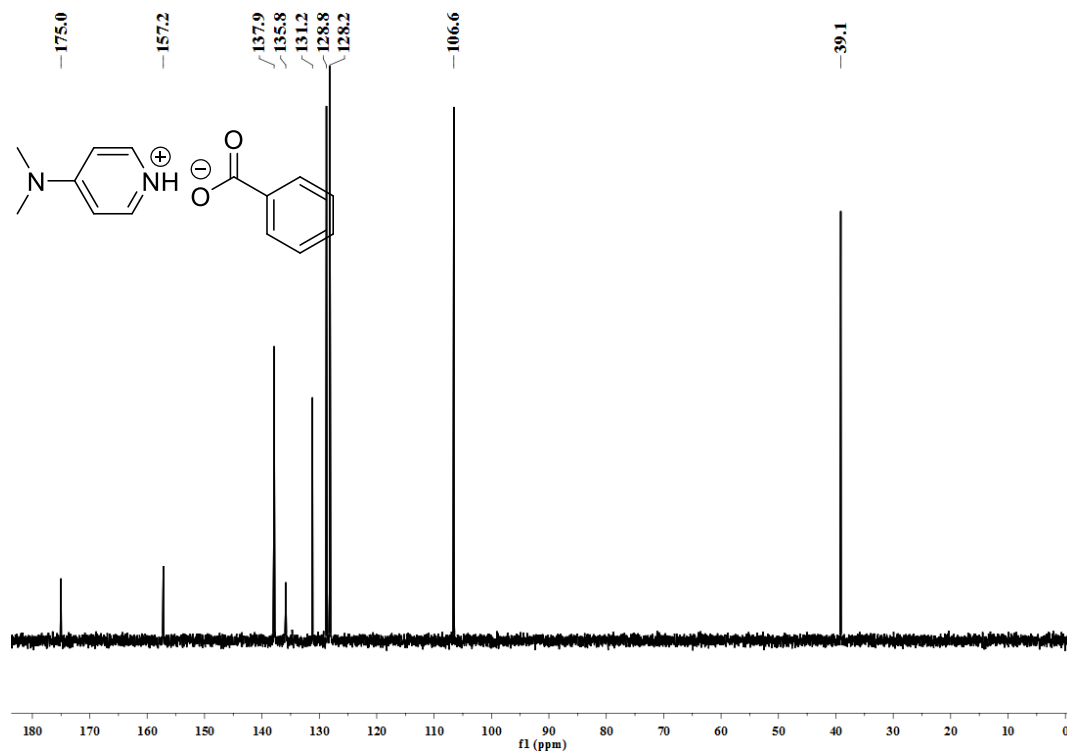

A5-B6: [DMAP][Ani]

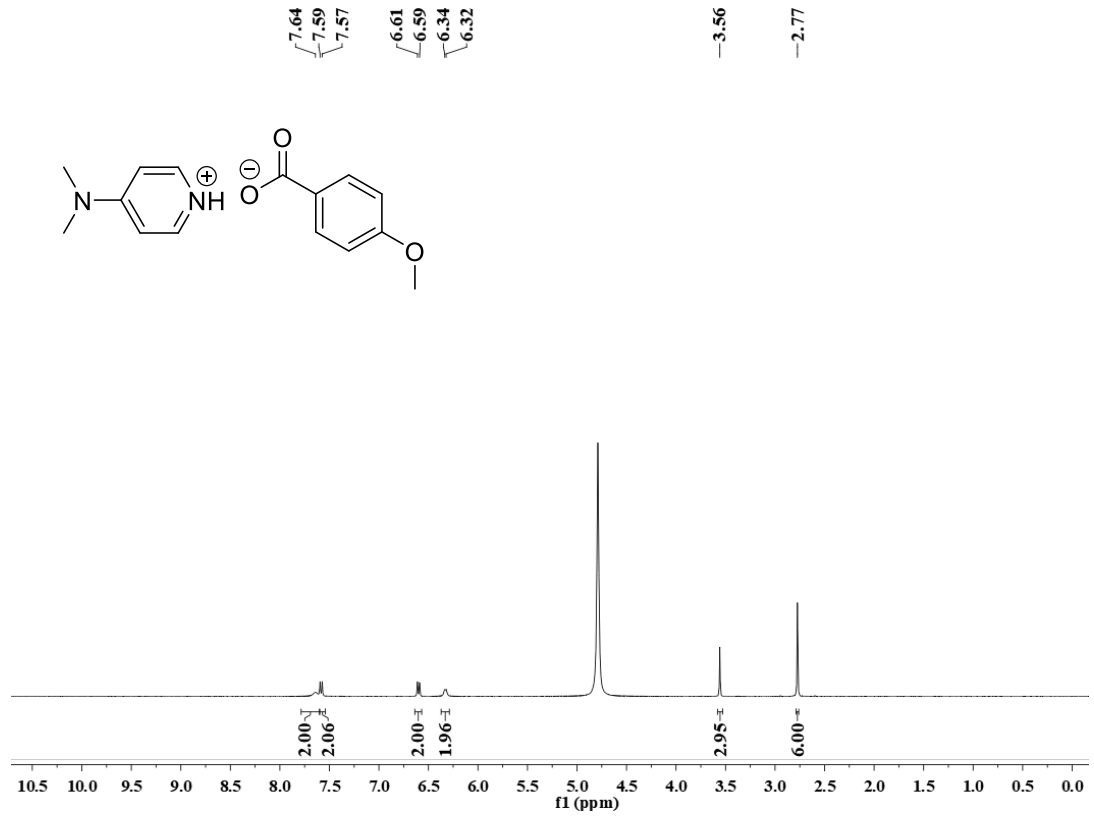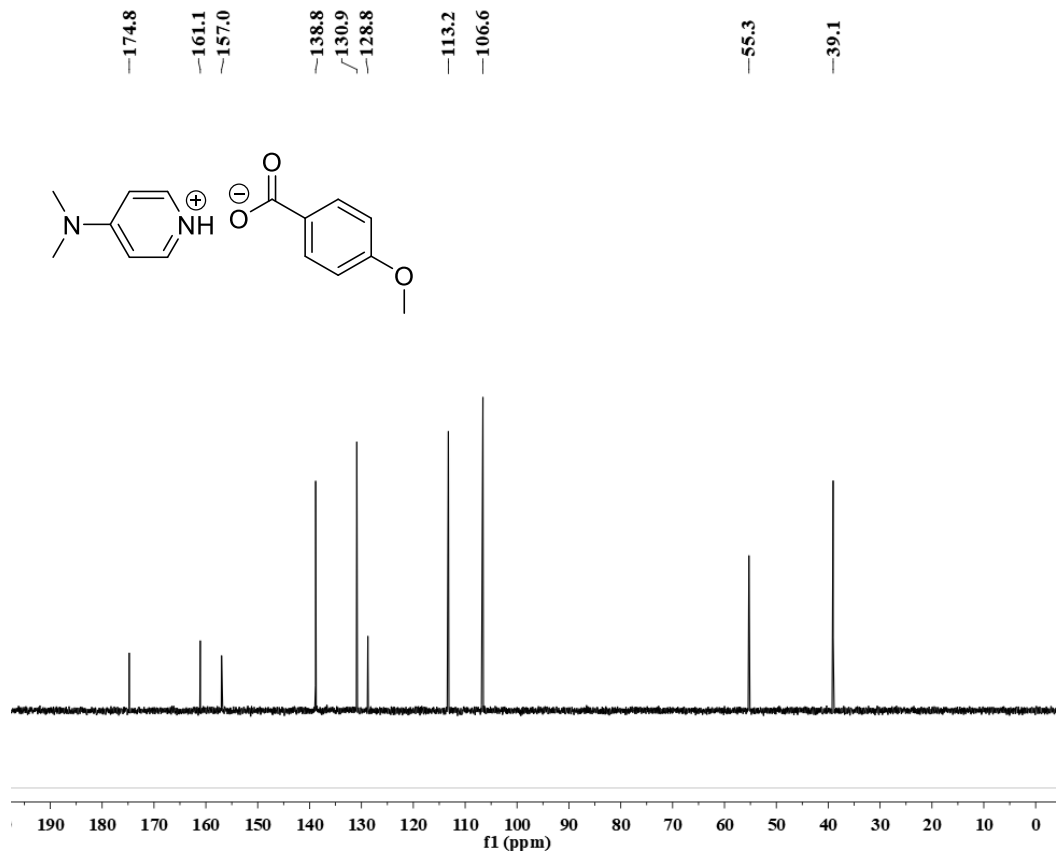



A5-B7: [DMAP][Gly]

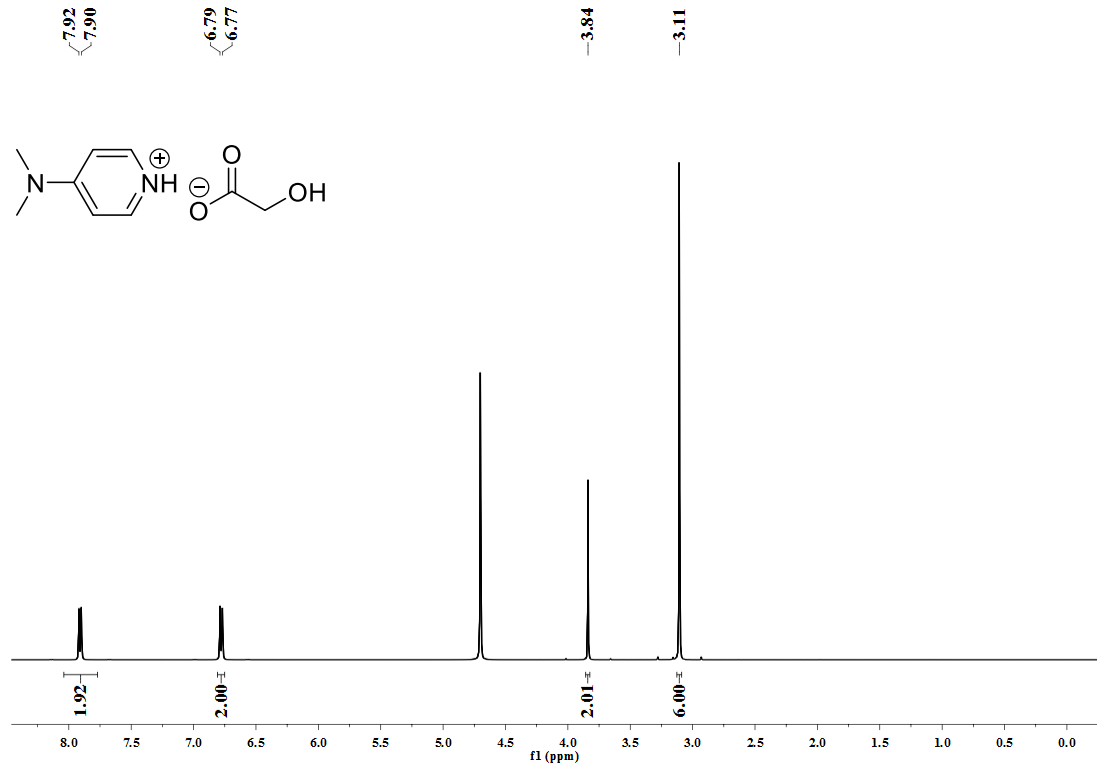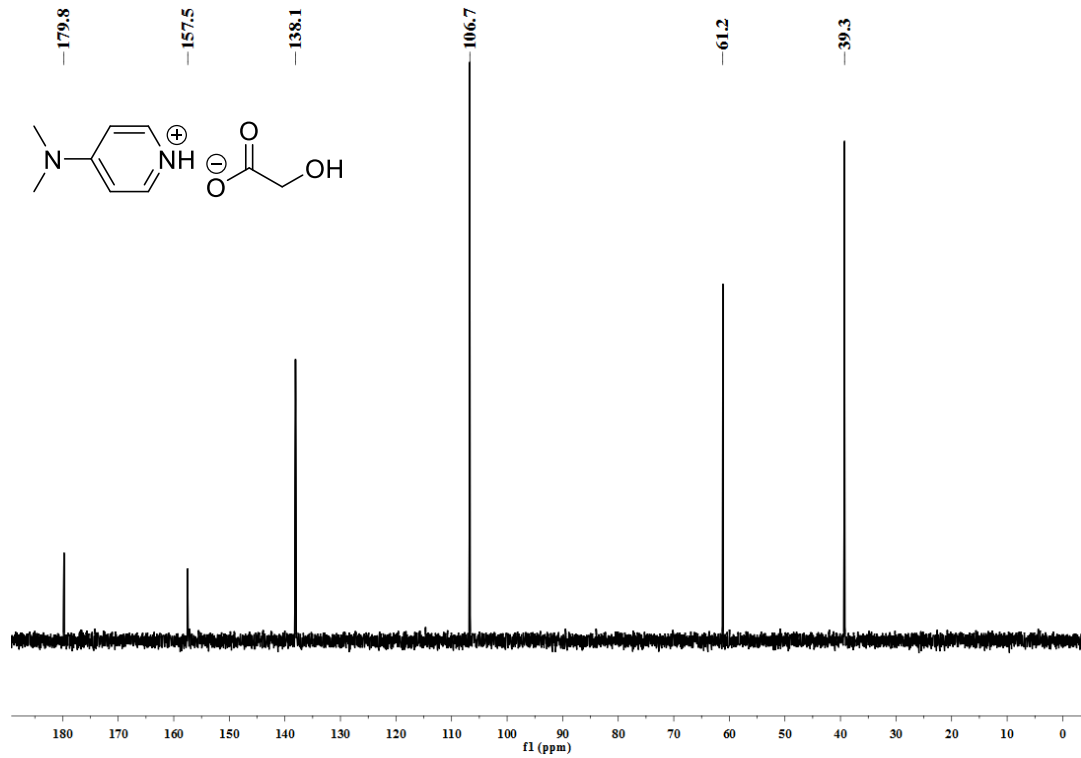

A5-B8: [DMAP][Lac]

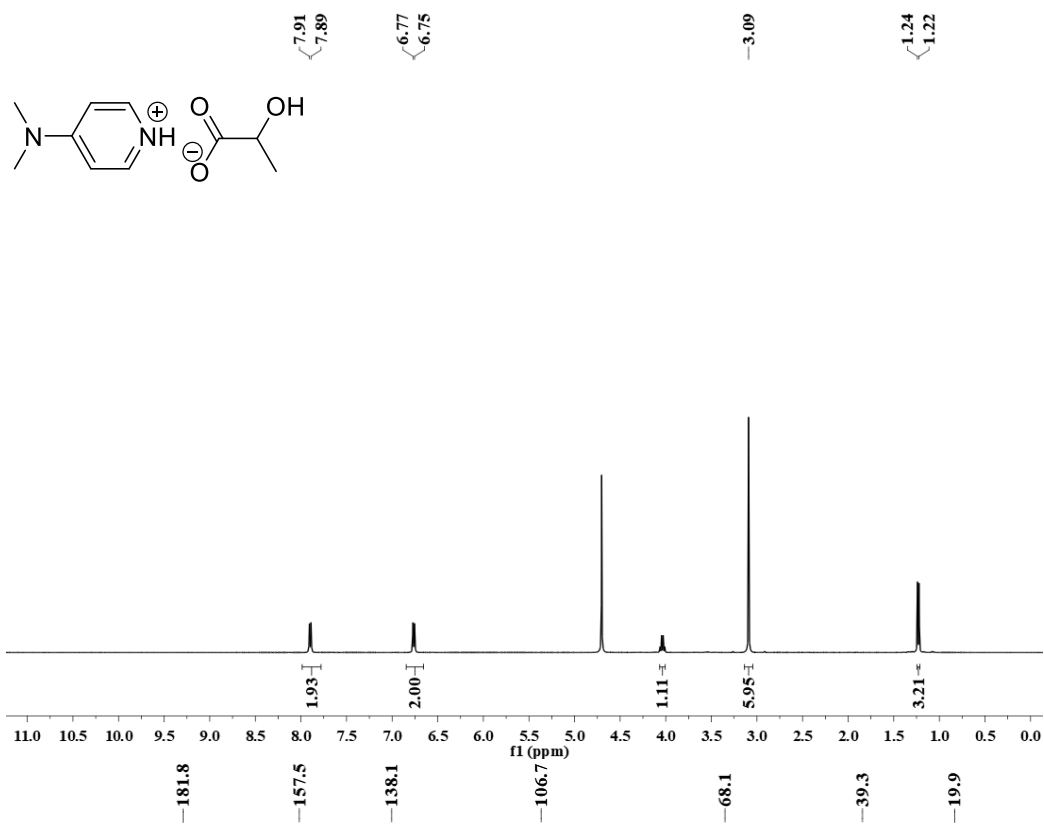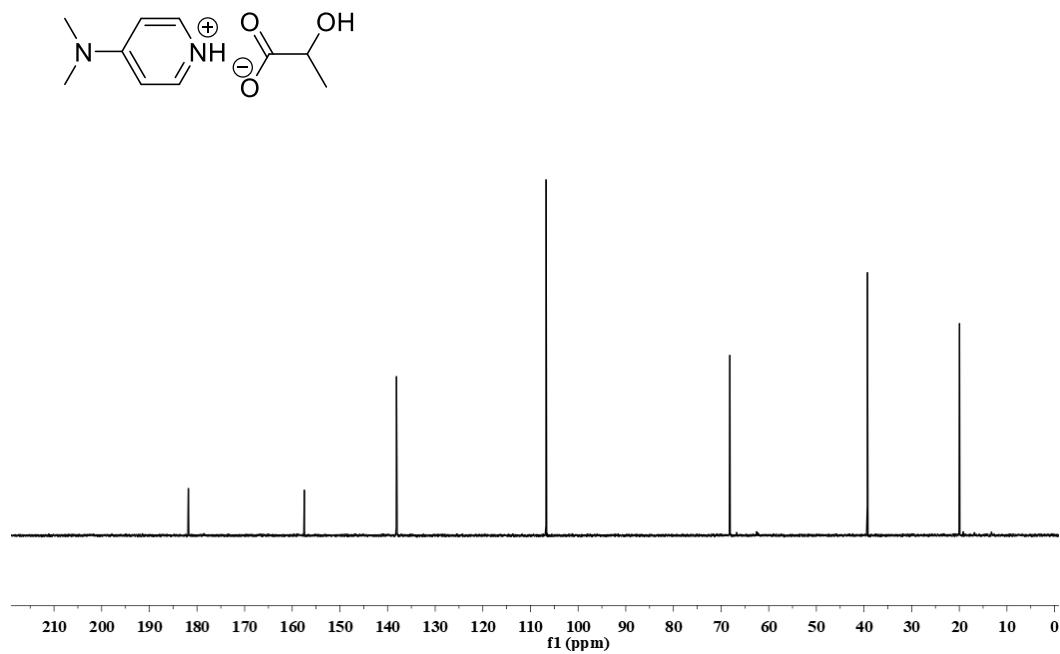

A5-B9: [DMAP][Cro]

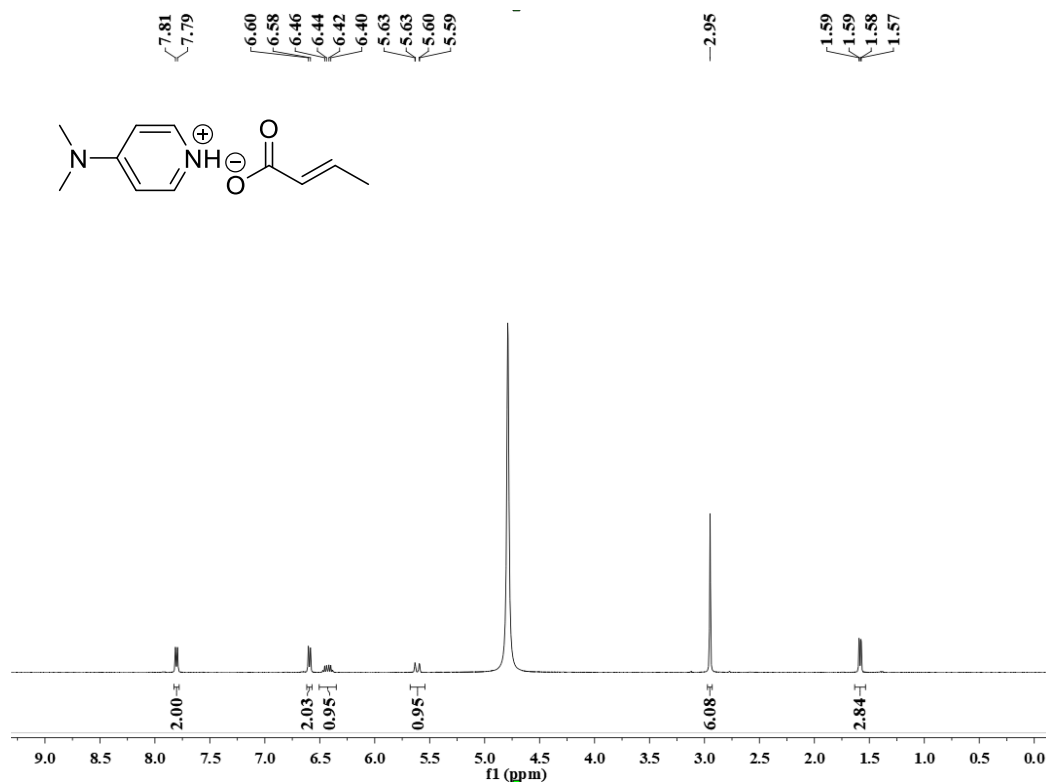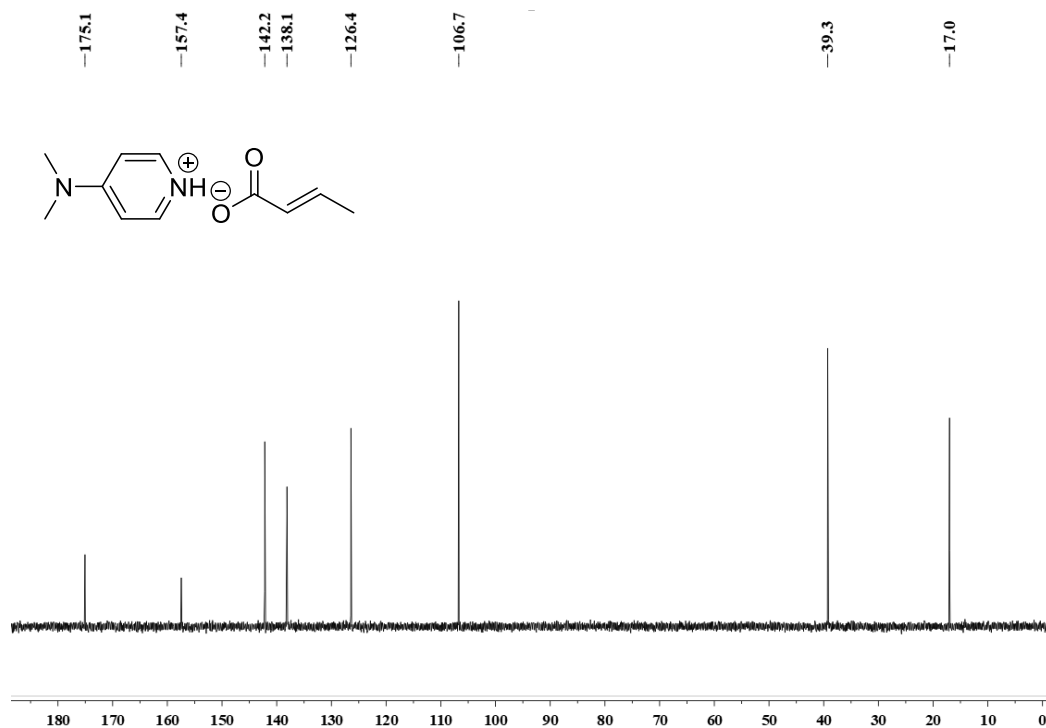

A5-B10: [DMAP][Tfa]

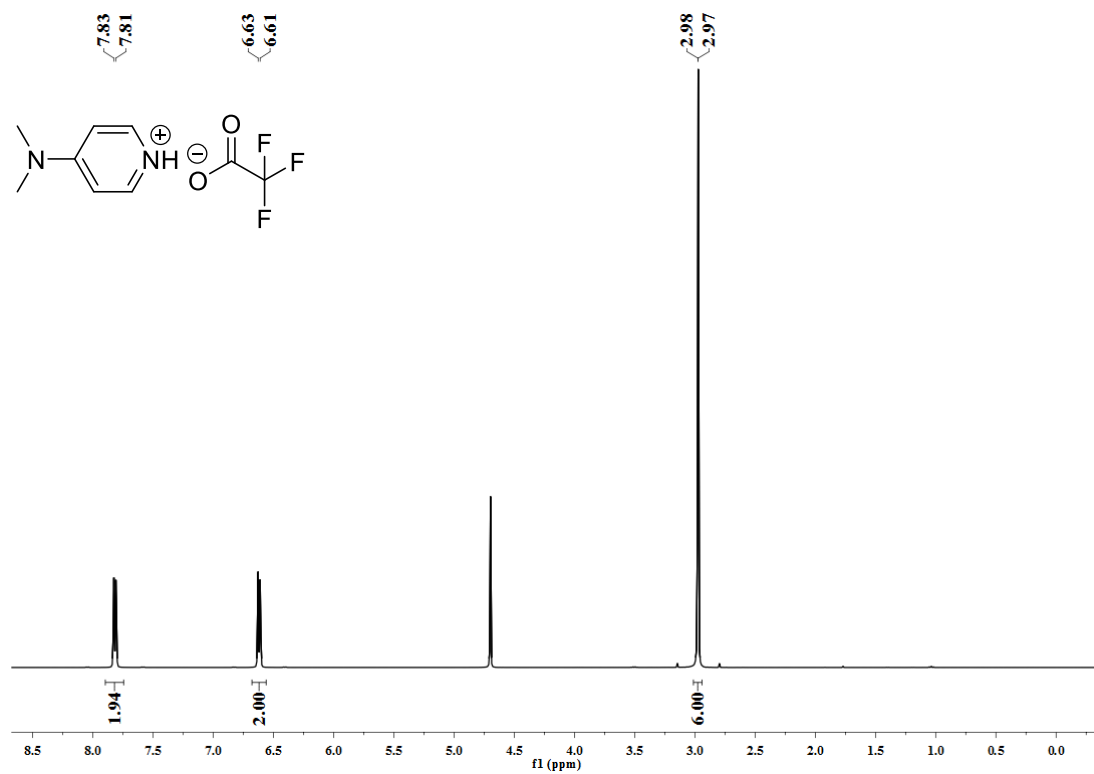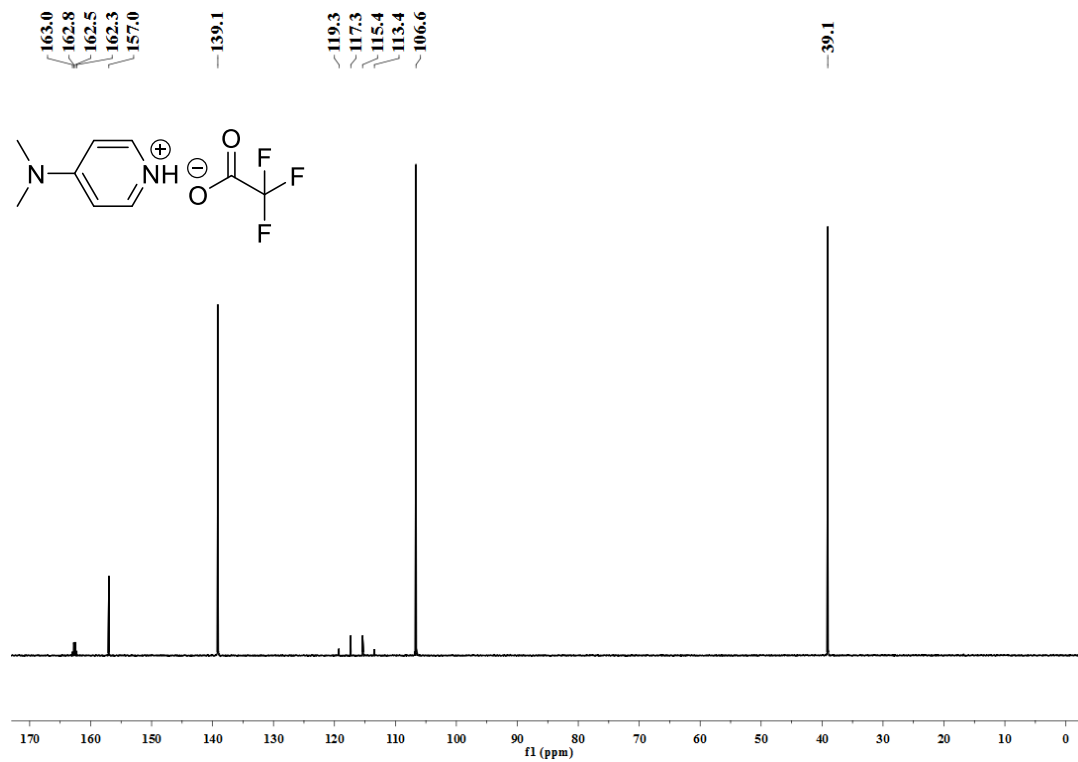

A5-B11: [DMAP][H<sub>2</sub>PO<sub>4</sub>]

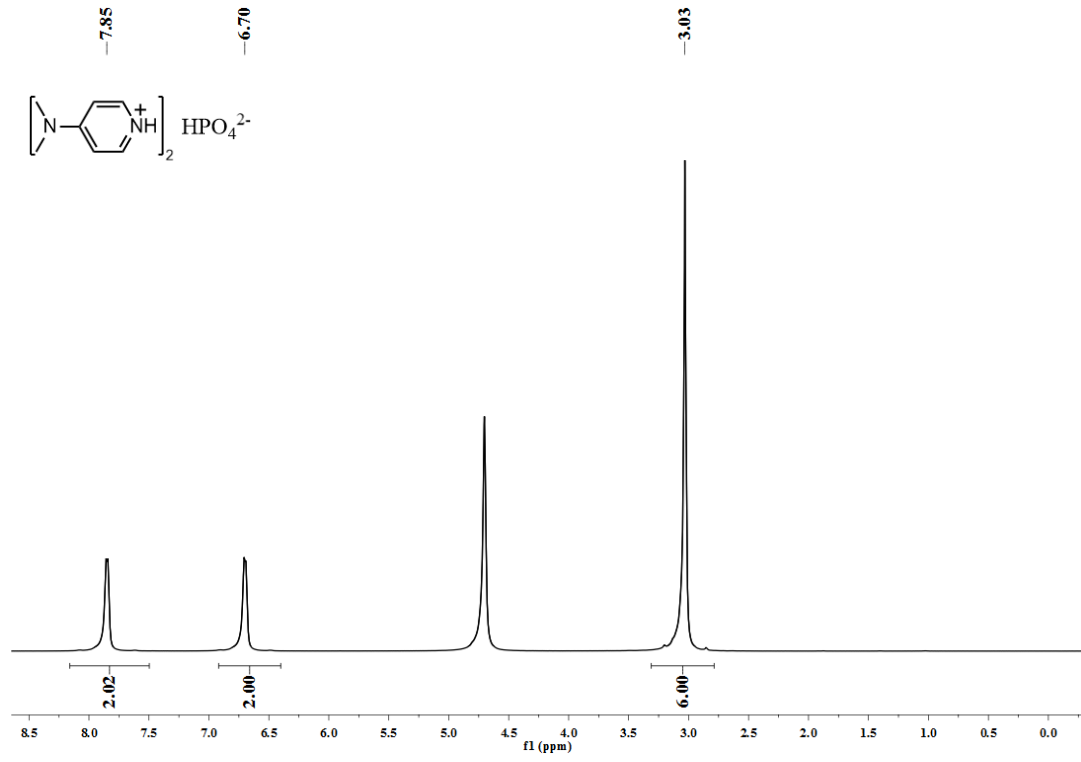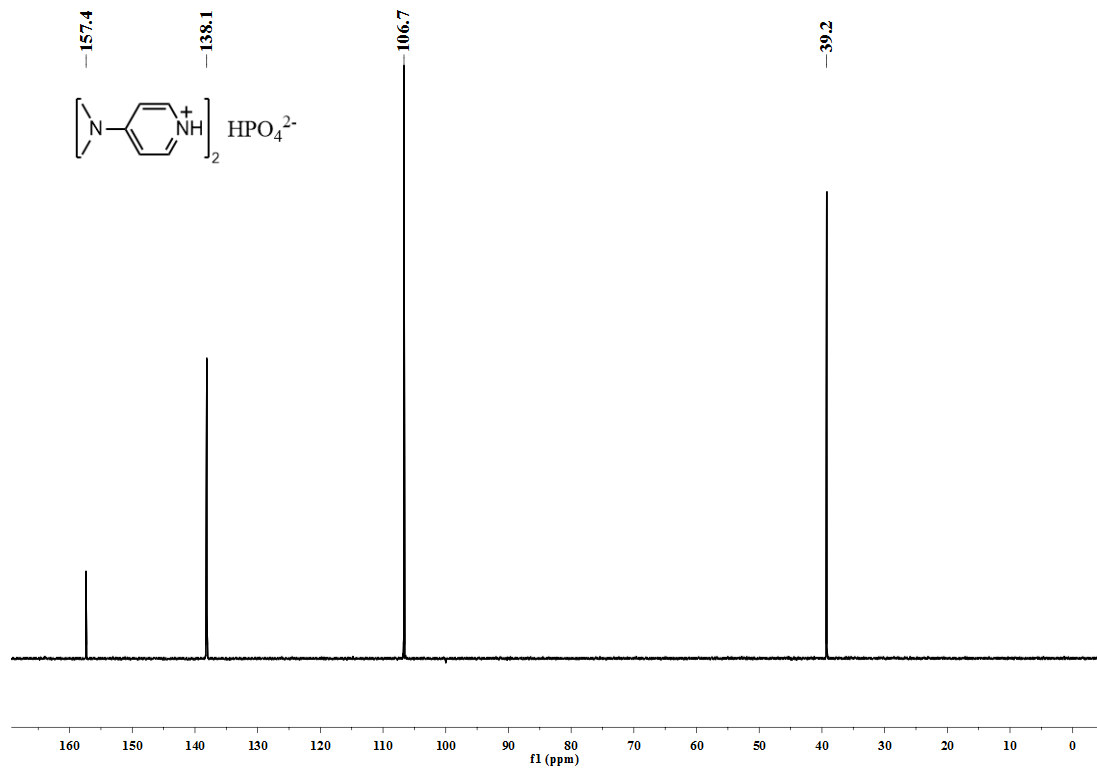

A5-B12: [DMAP][HPO<sub>4</sub>]

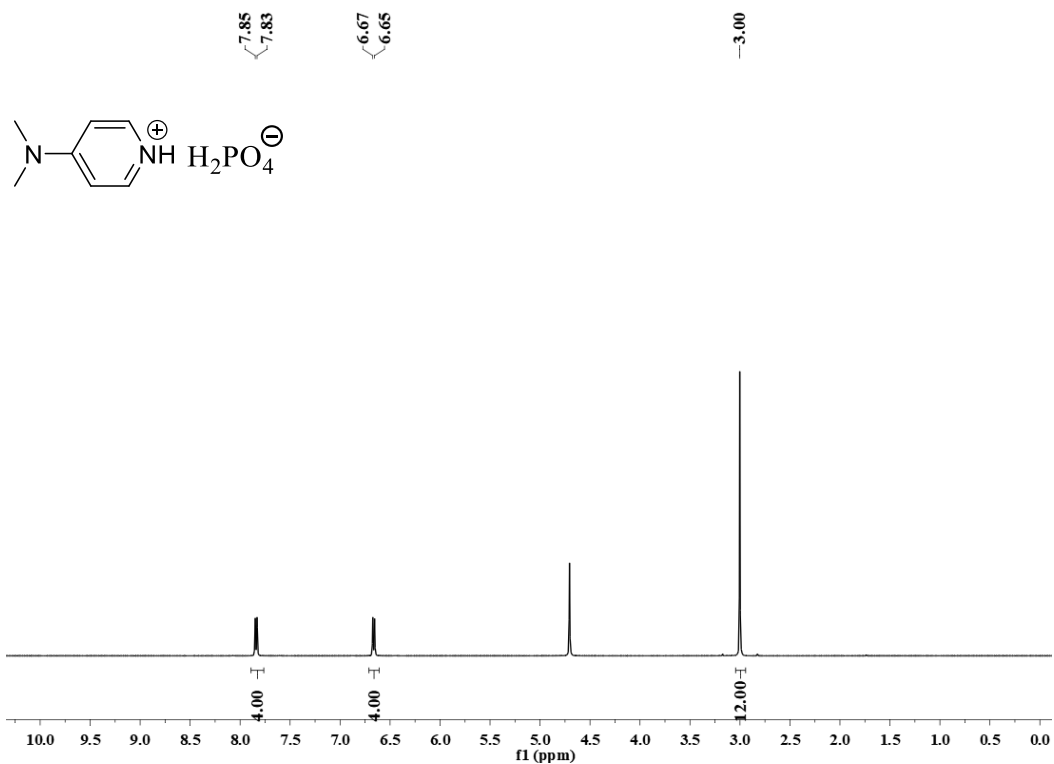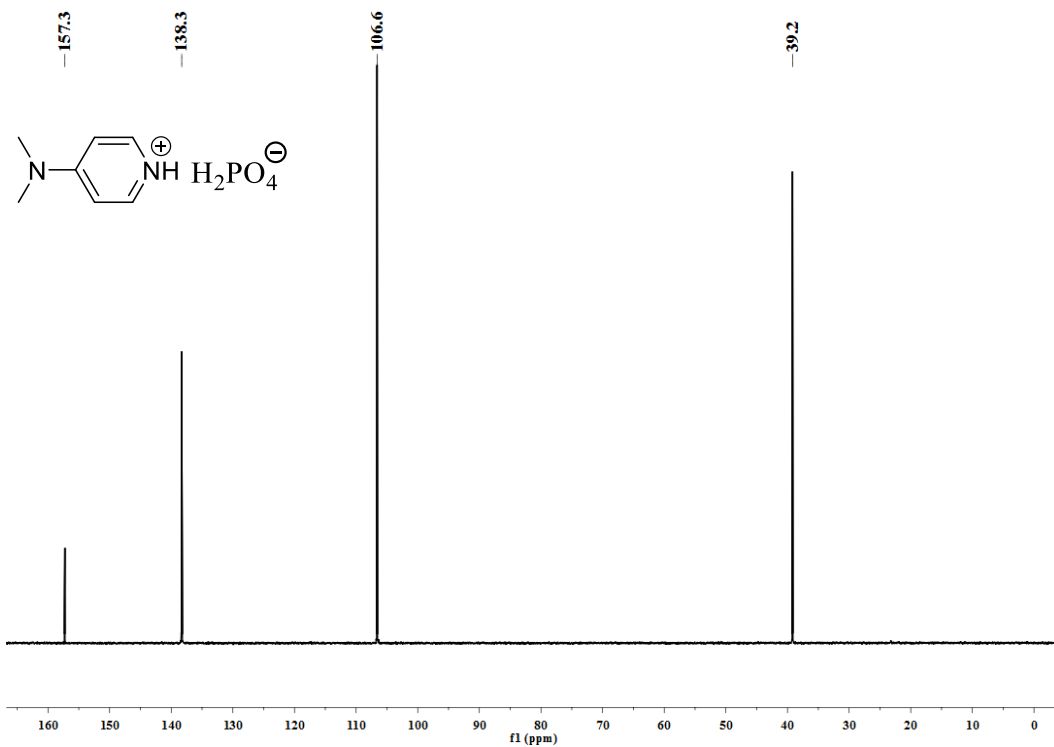

A6-B1: [2-AnPy][Ac]

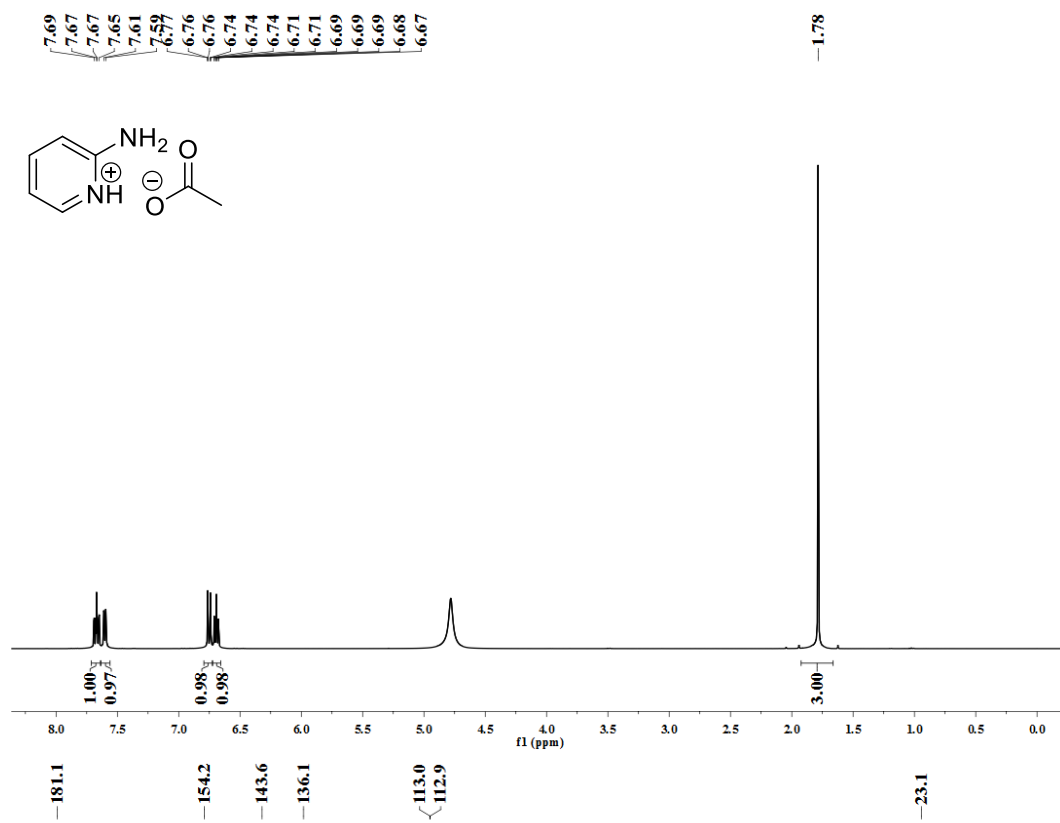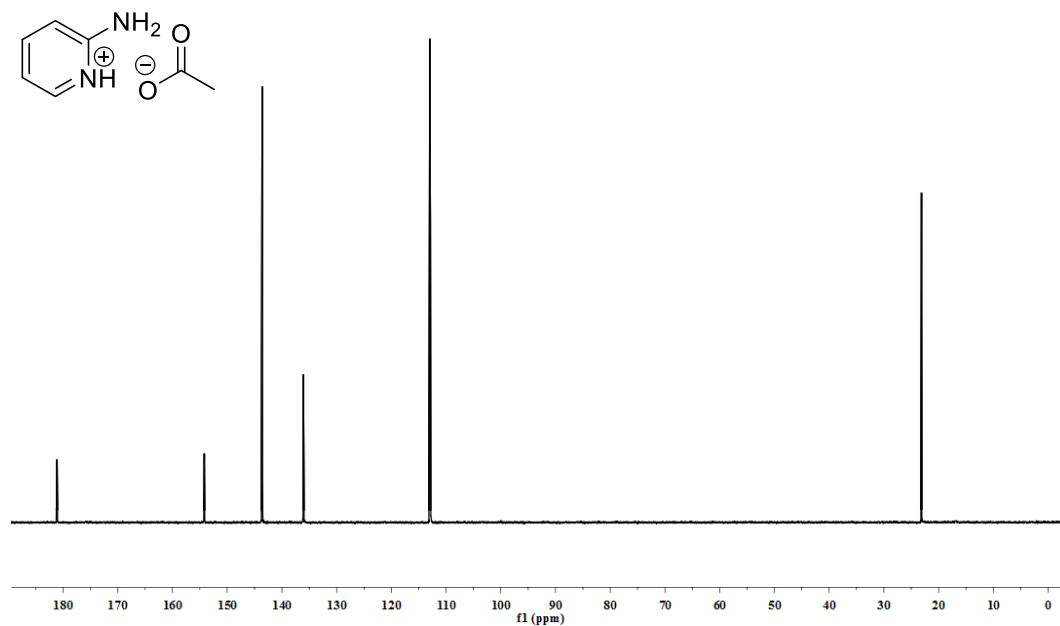

A6-B2: [2-AnPy][Pro]

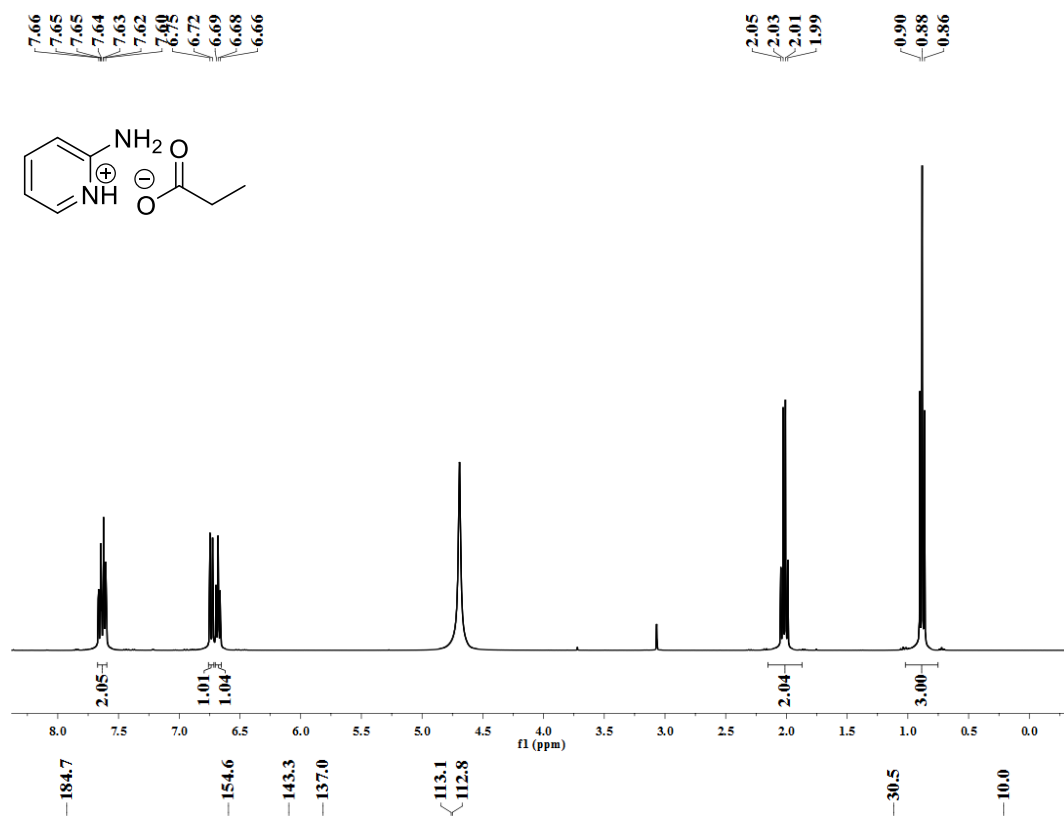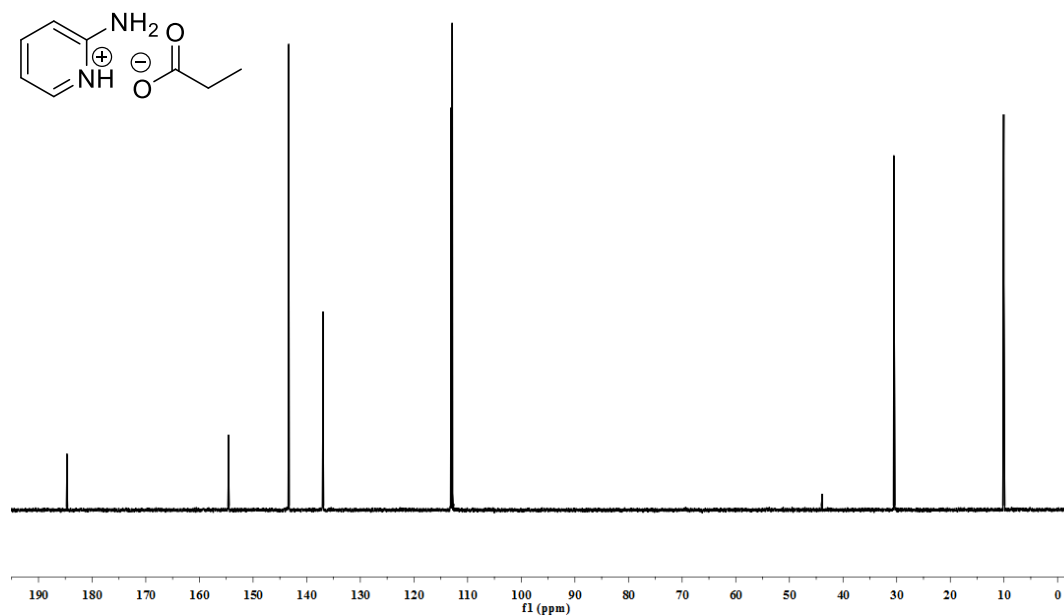



A6-B3: [2-AnPy][But]

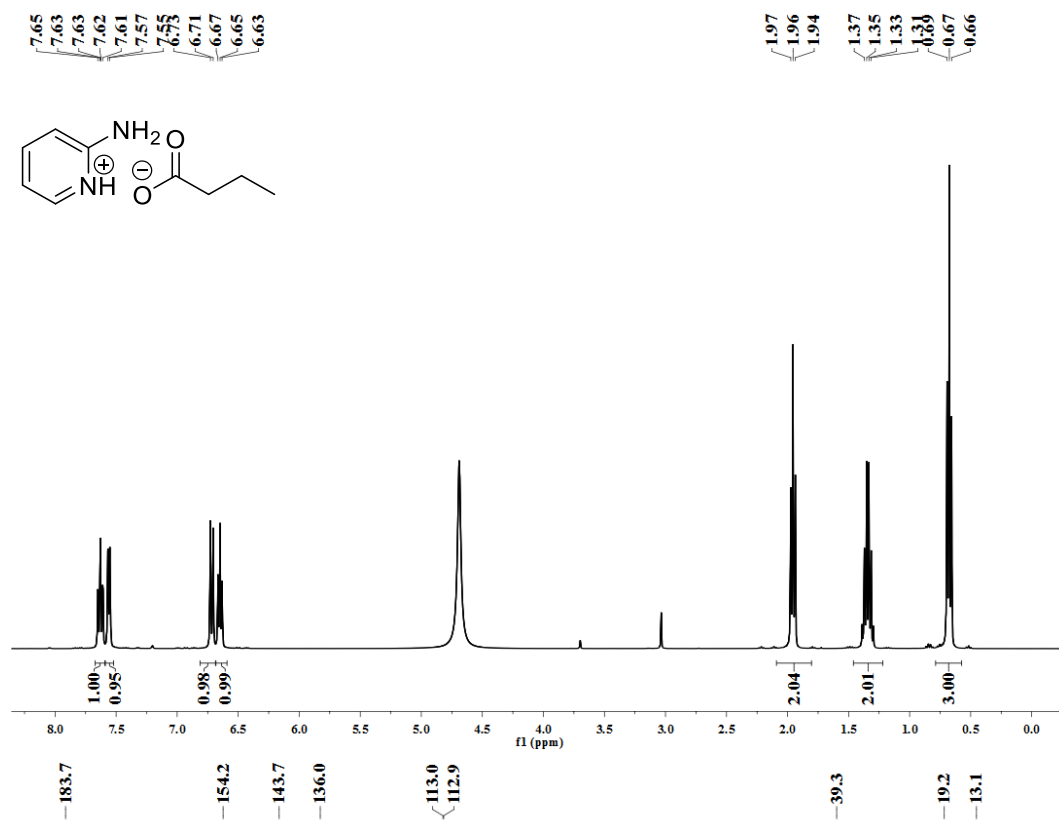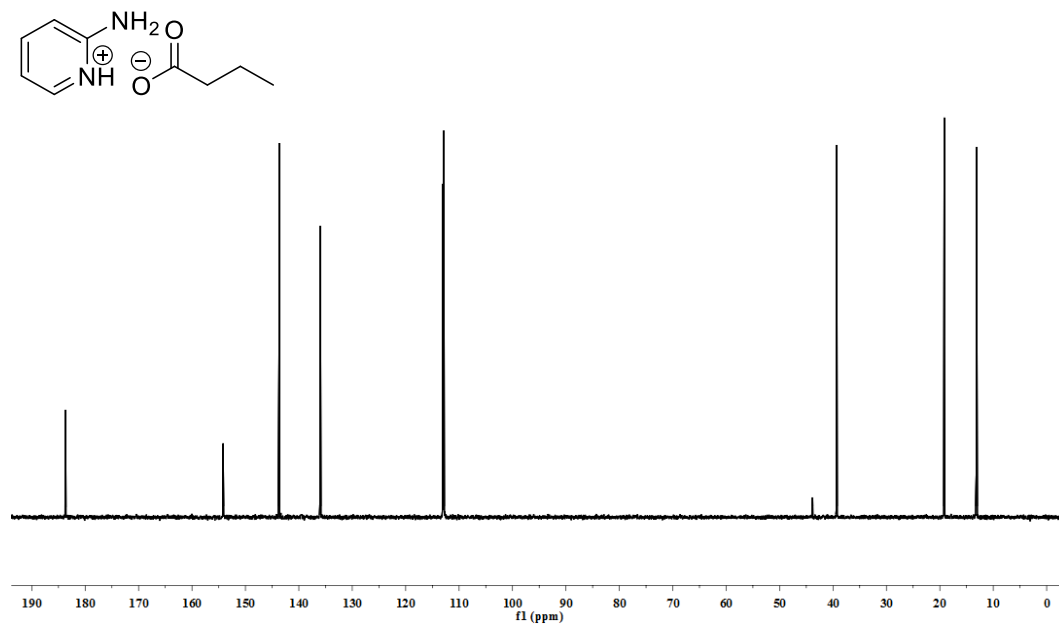

A6-B4: [2-AnPy][Val]

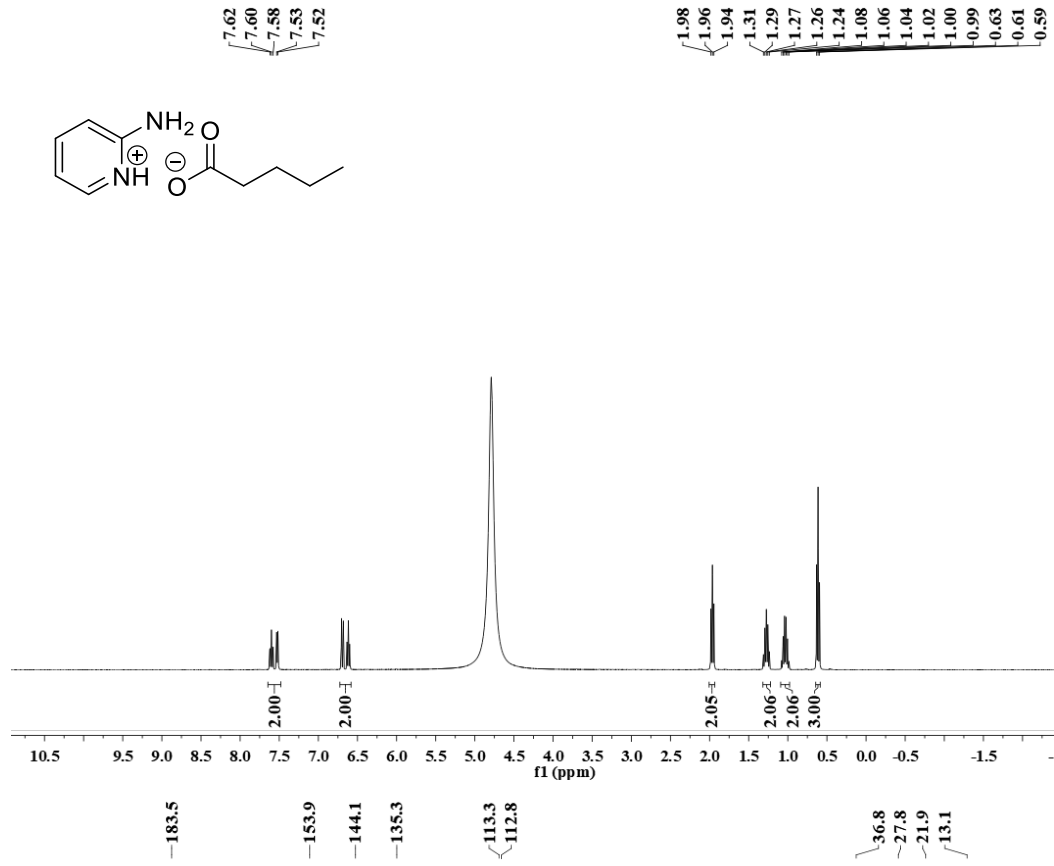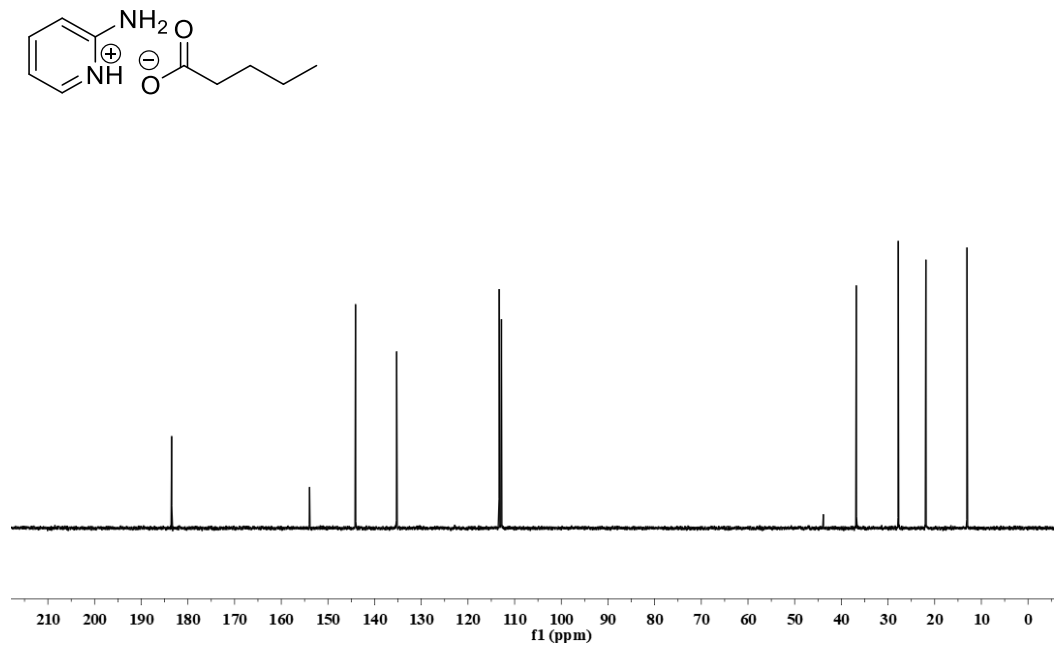

A6-B5: [2-AnPy][Ben]

8.01  
8.00  
7.99  
7.93  
7.92  
7.64  
7.63  
7.61  
7.60  
7.59  
7.53  
7.51  
7.49  
7.44  
7.43  
7.42  
7.41

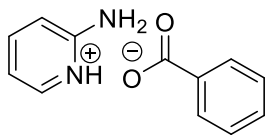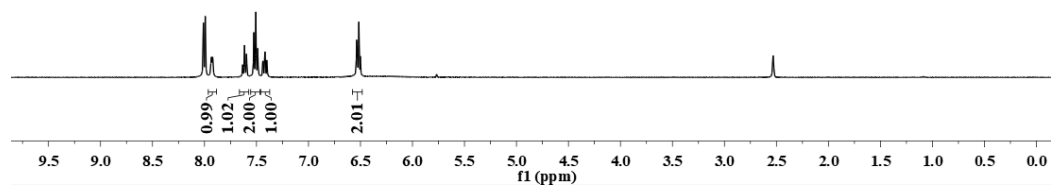

168.5  
159.9  
147.3  
137.8  
133.0  
132.0  
129.7  
128.9  
112.2  
108.8  
40.6  
40.4  
40.2  
39.9  
39.7  
39.5  
39.3

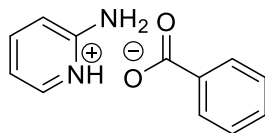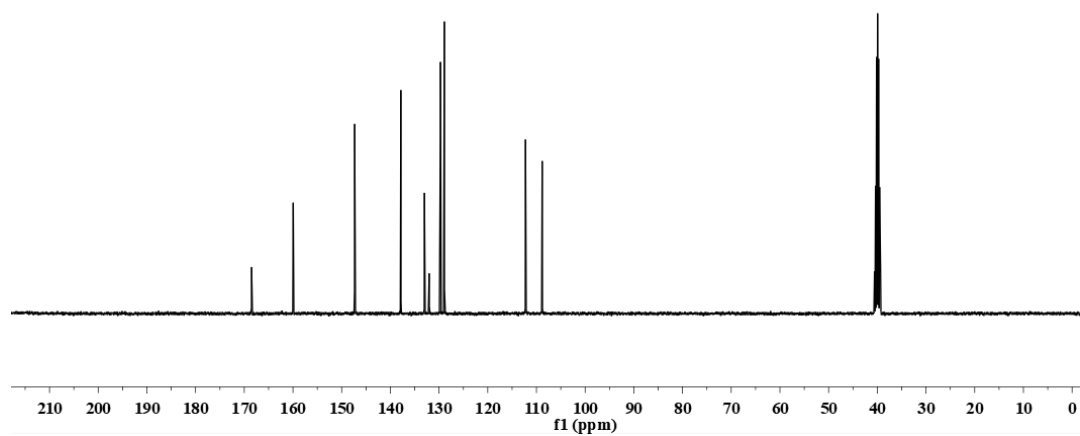

A6-B6: [2-AnPy][Ani]

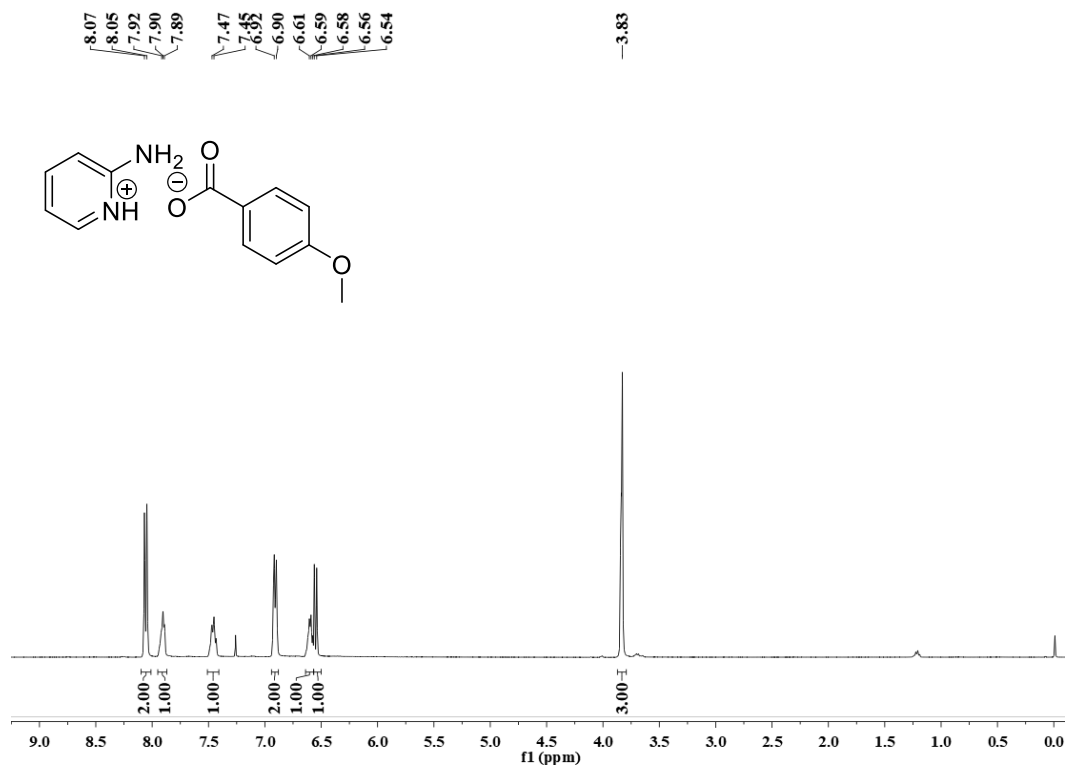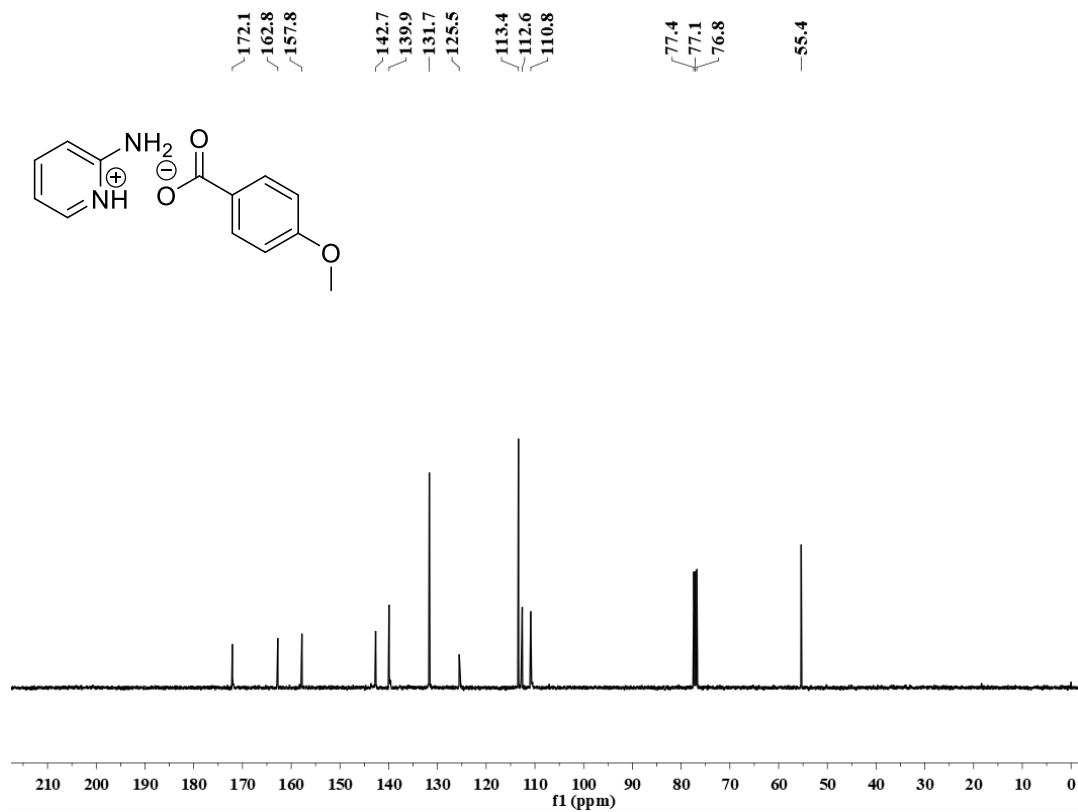

A6-B7: [2-AnPy][Gly]

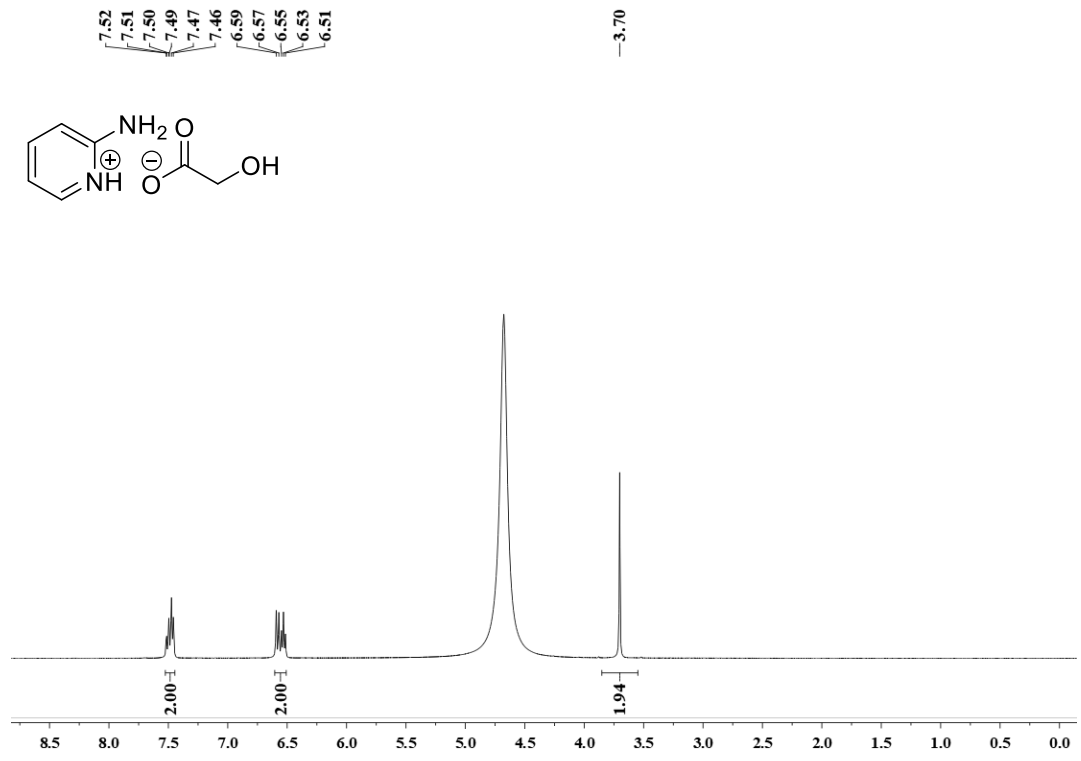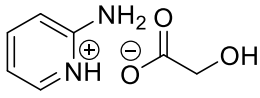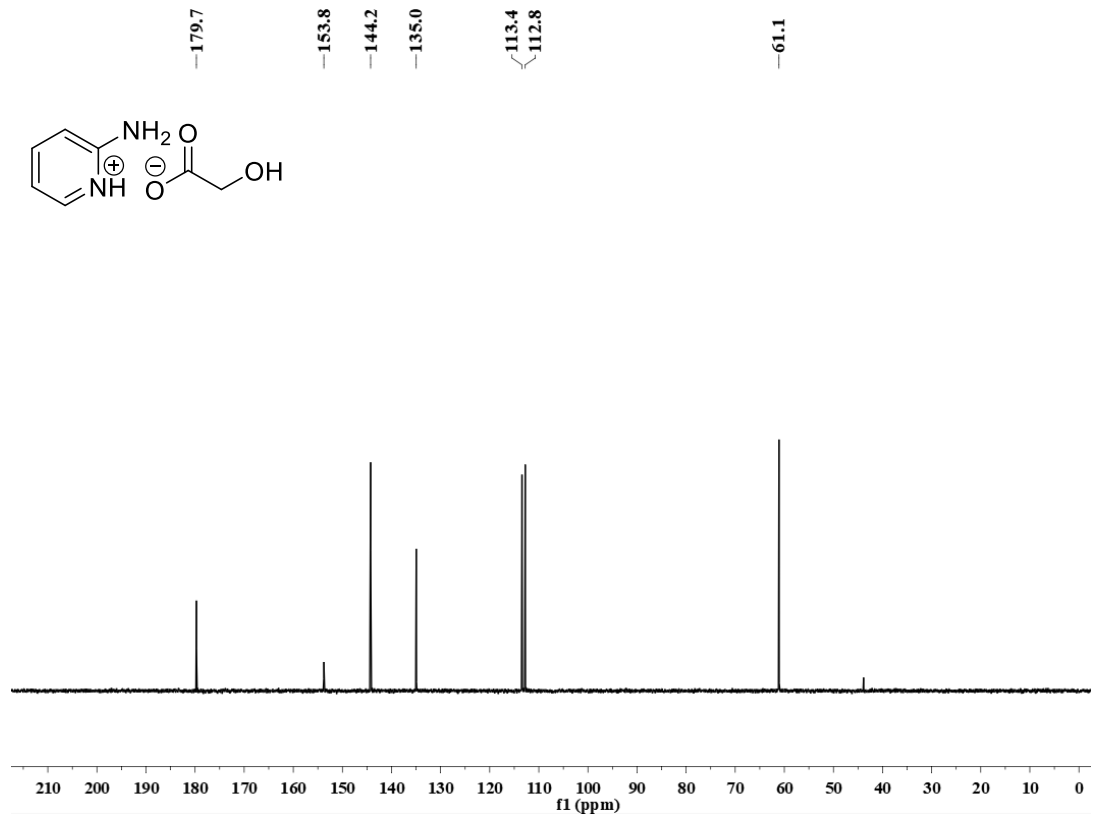

A6-B8: [2-AnPy][Lac]

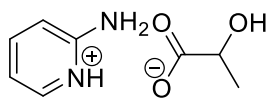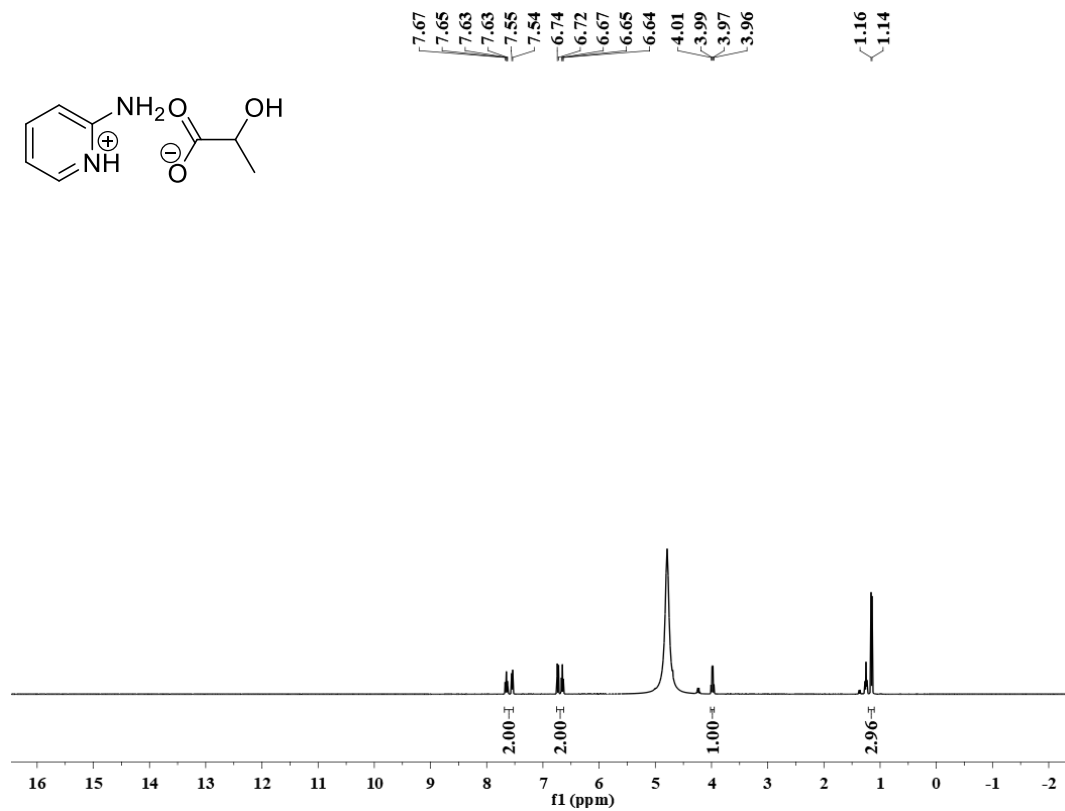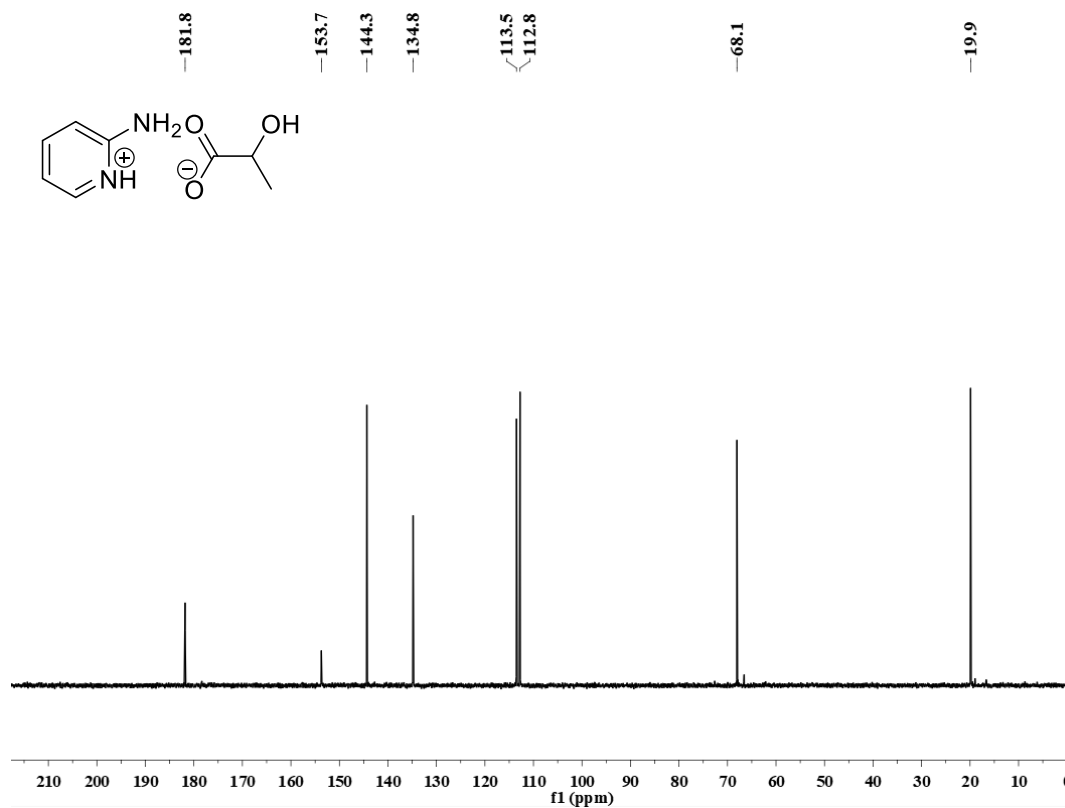

A6-B9: [2-AnPy][Cro]

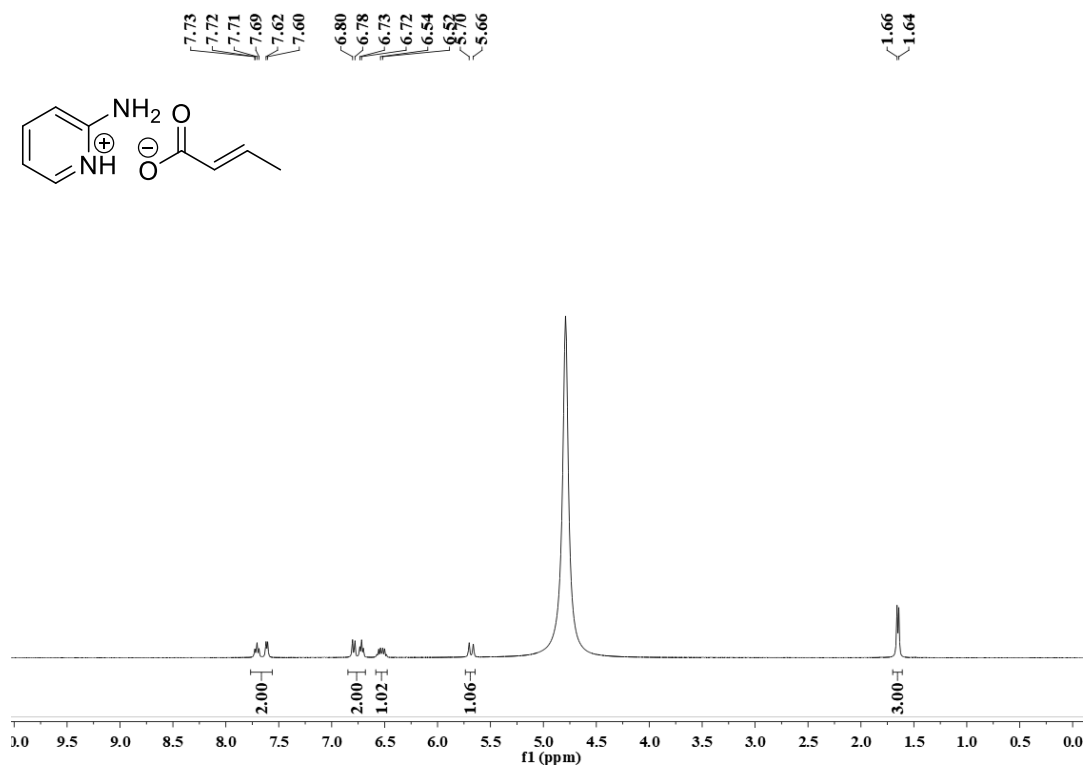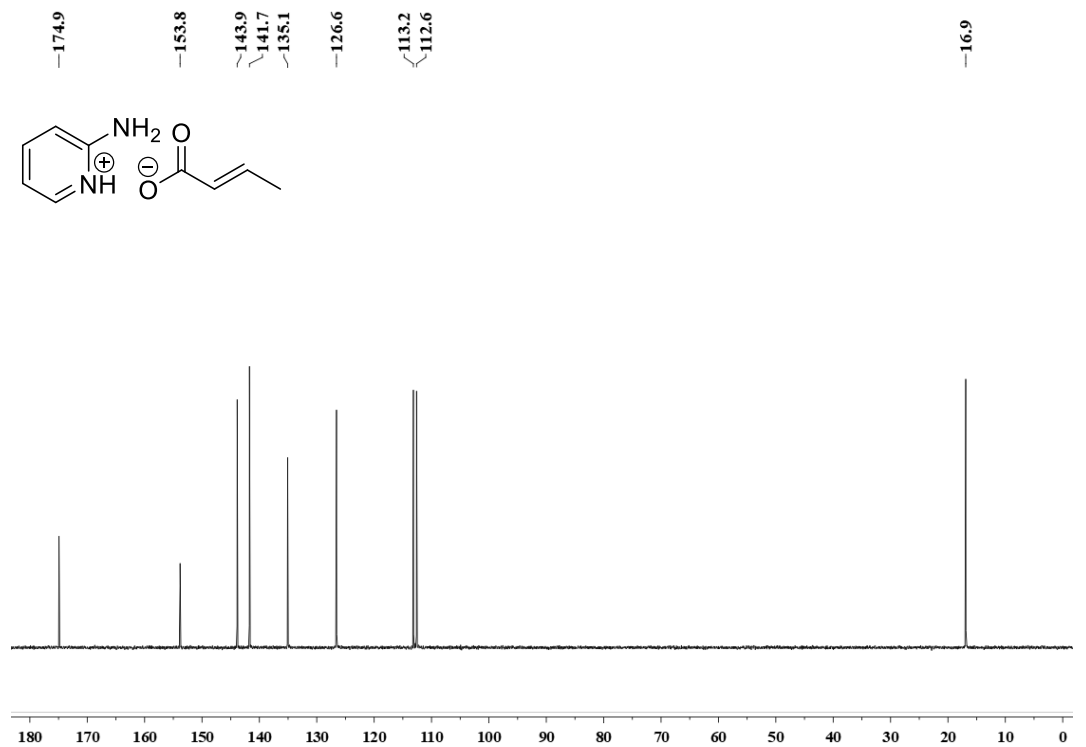

A6-B10: [2-AnPy][Tfa]

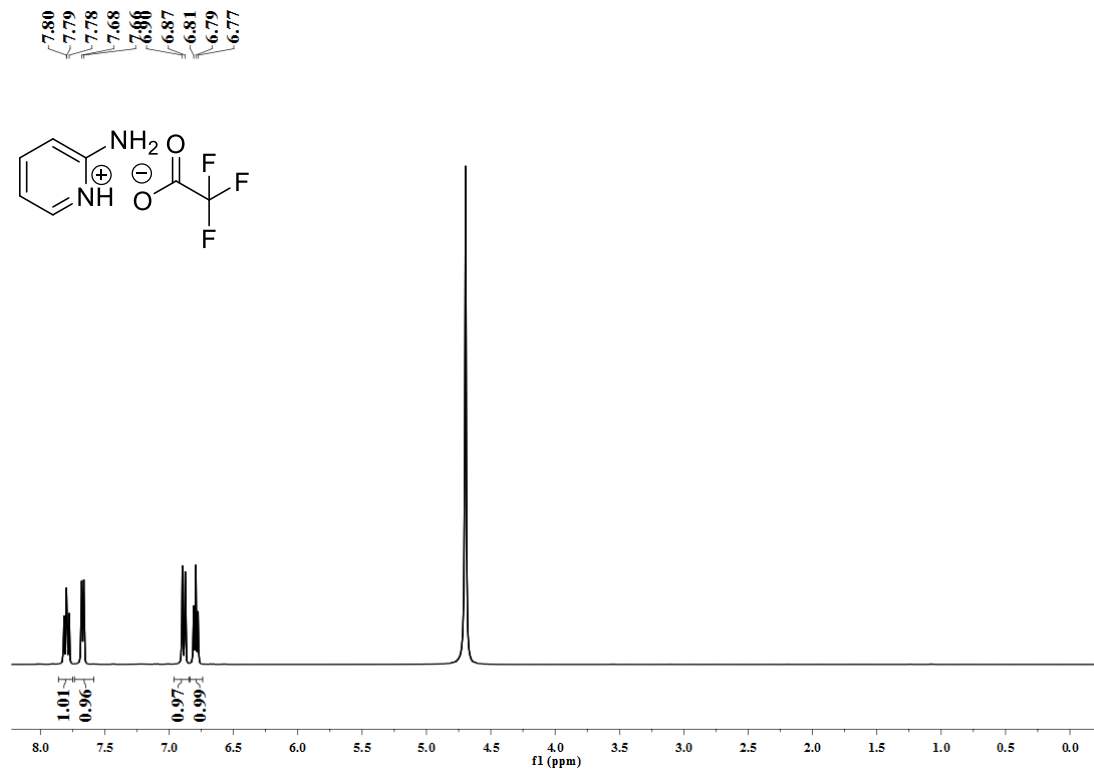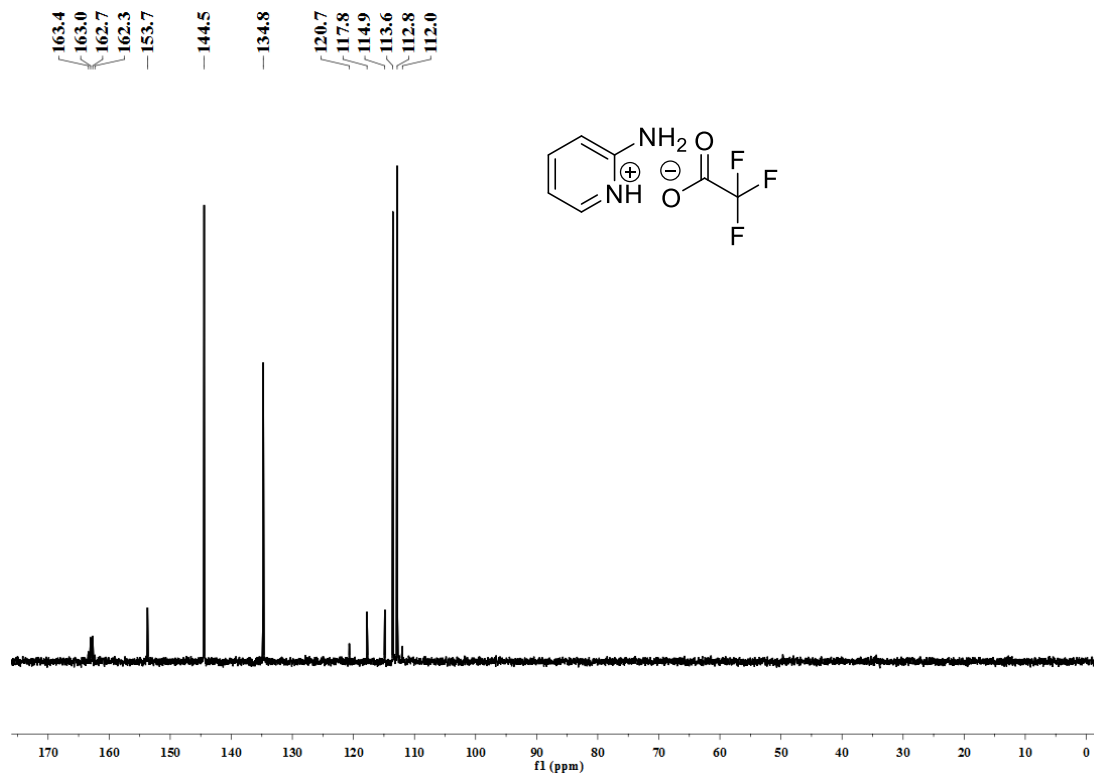



A6-B11: [2-AnPy][HPO<sub>4</sub>]

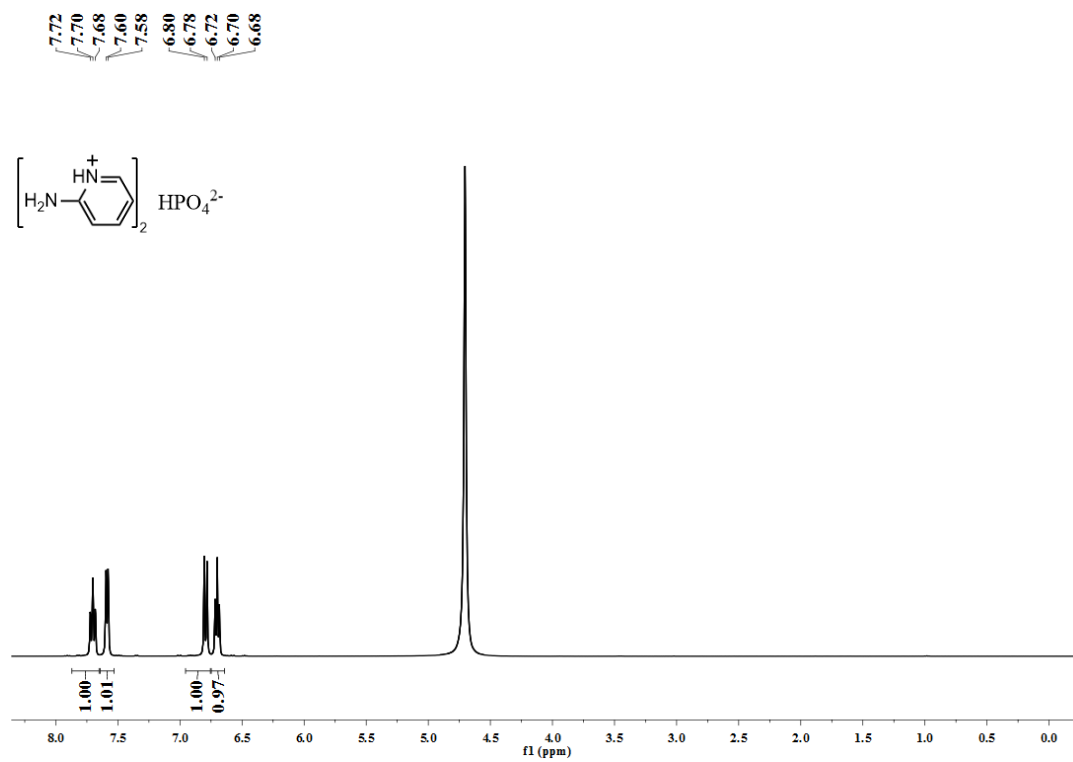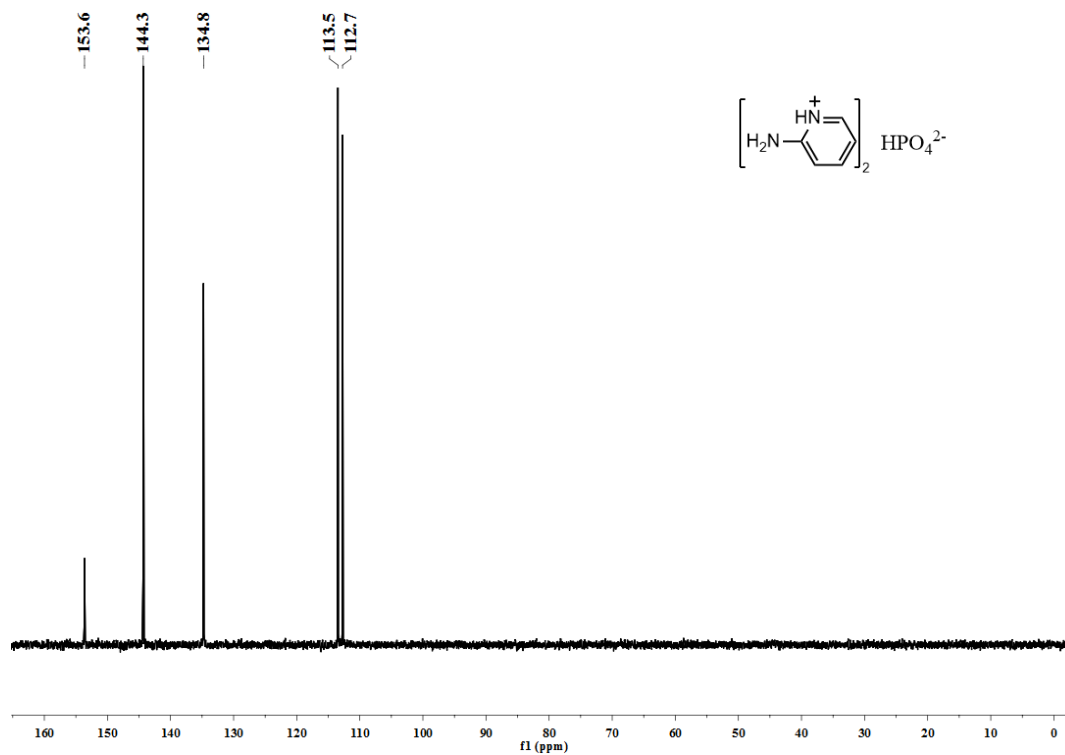

A6-B12: [2-AnPy][H<sub>2</sub>PO<sub>4</sub>]

7.64  
7.62  
7.60  
7.59  
6.72  
6.67  
6.65  
6.63

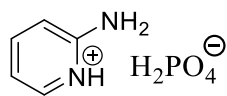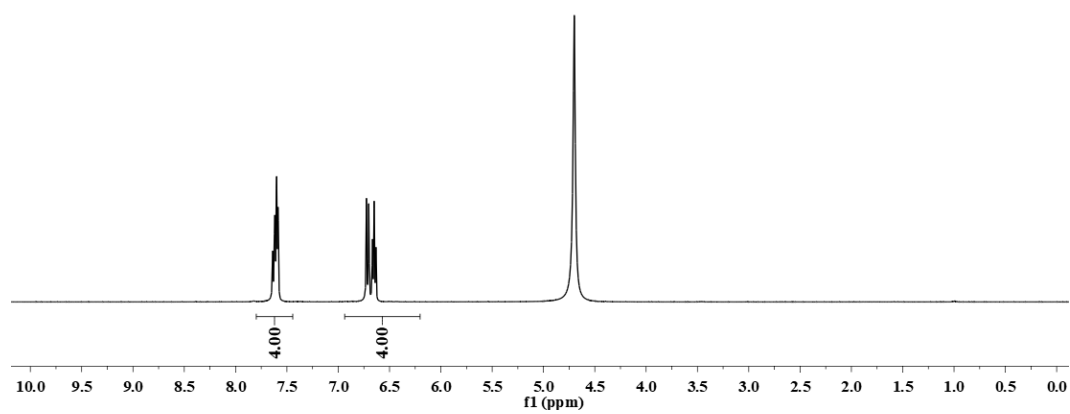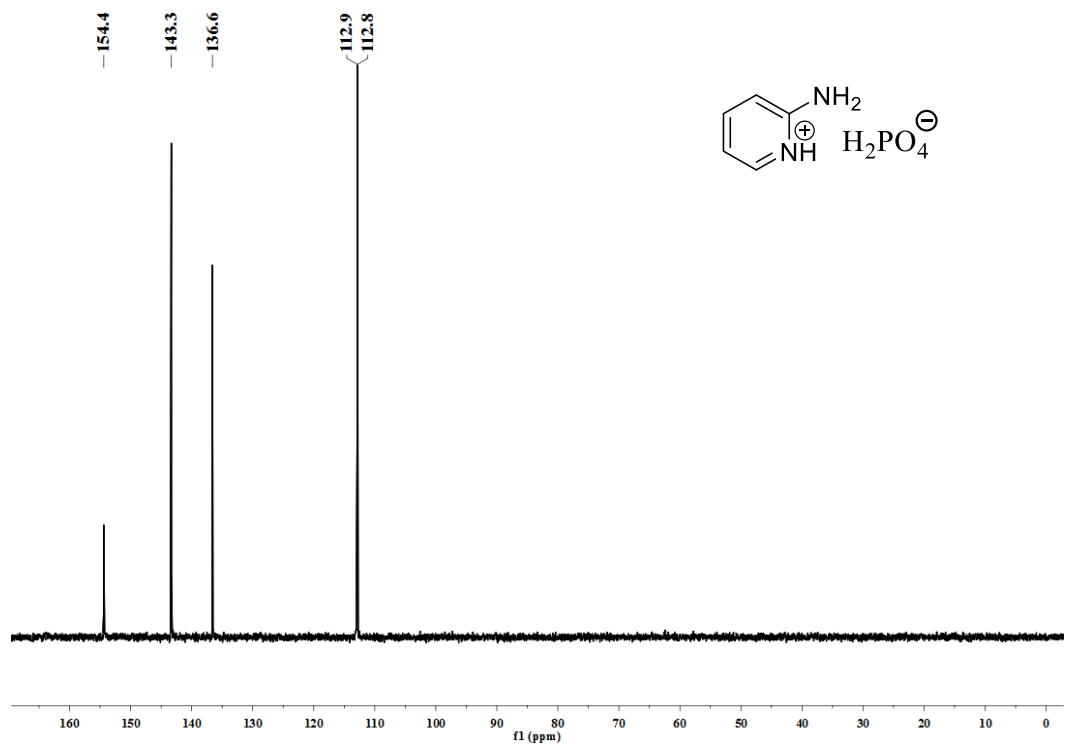

**Dimethyl(5-methyl-1-(3-(trifluoromethyl)phenyl)-1H-1,2,3-triazol-4-yl)phosphonate (3a)**

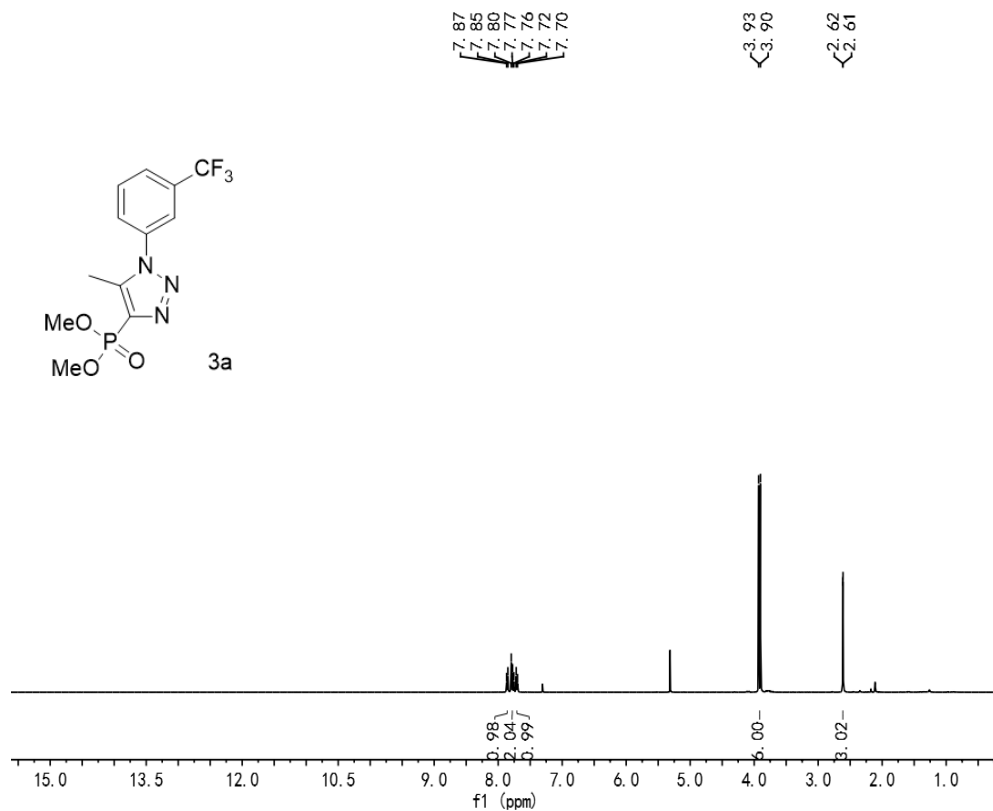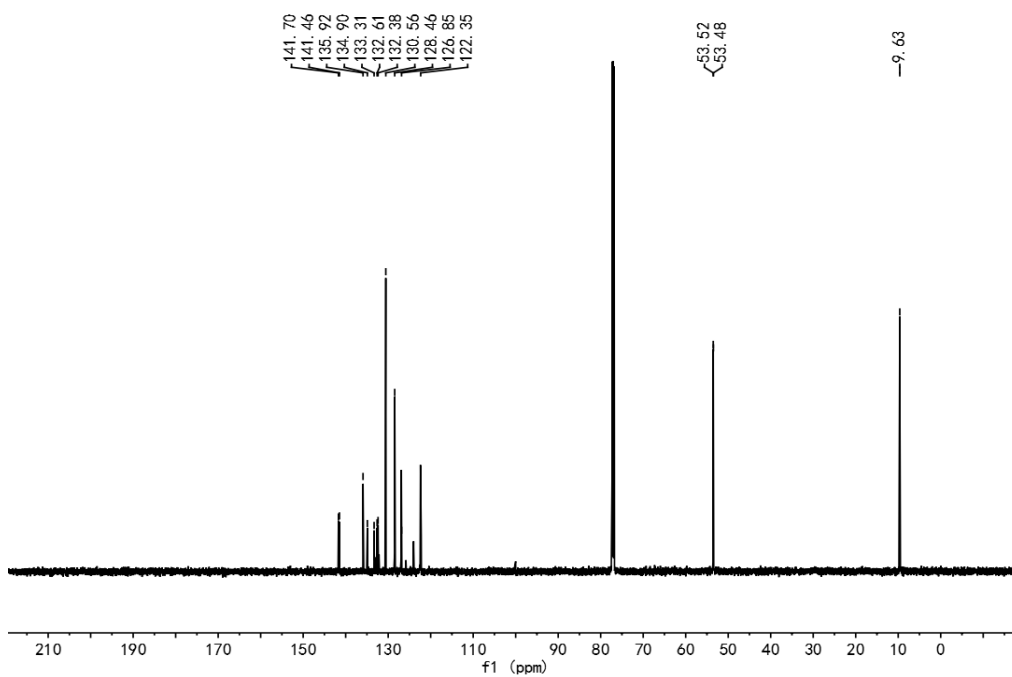

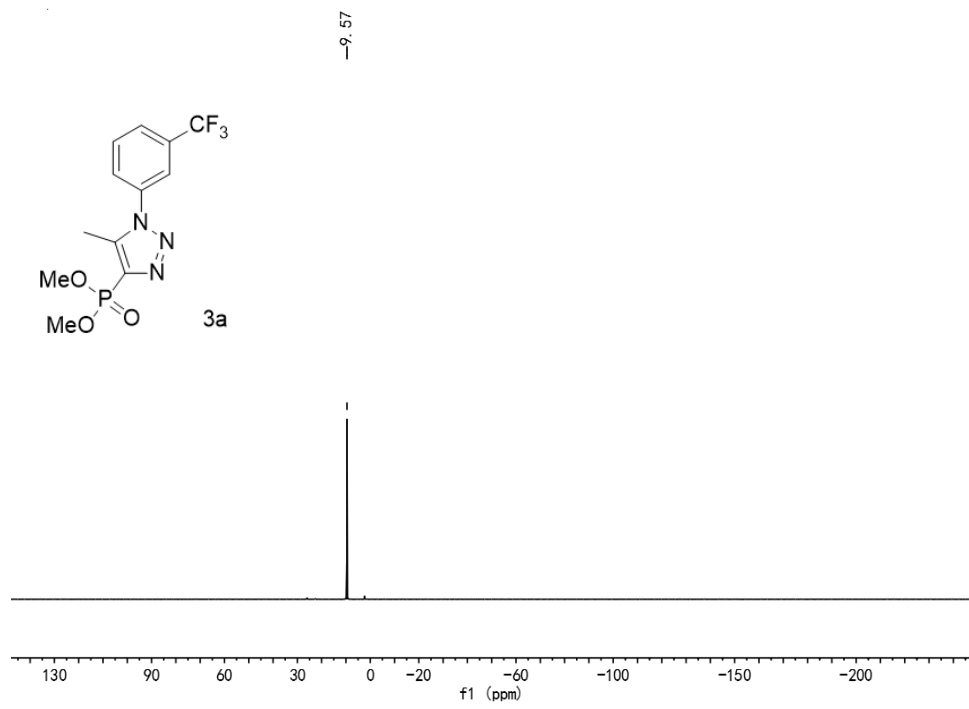

# Dimethyl(1-(4-fluorophenyl)-5-methyl-1H-1,2,3-triazol-4-yl)phosphonate(3b)

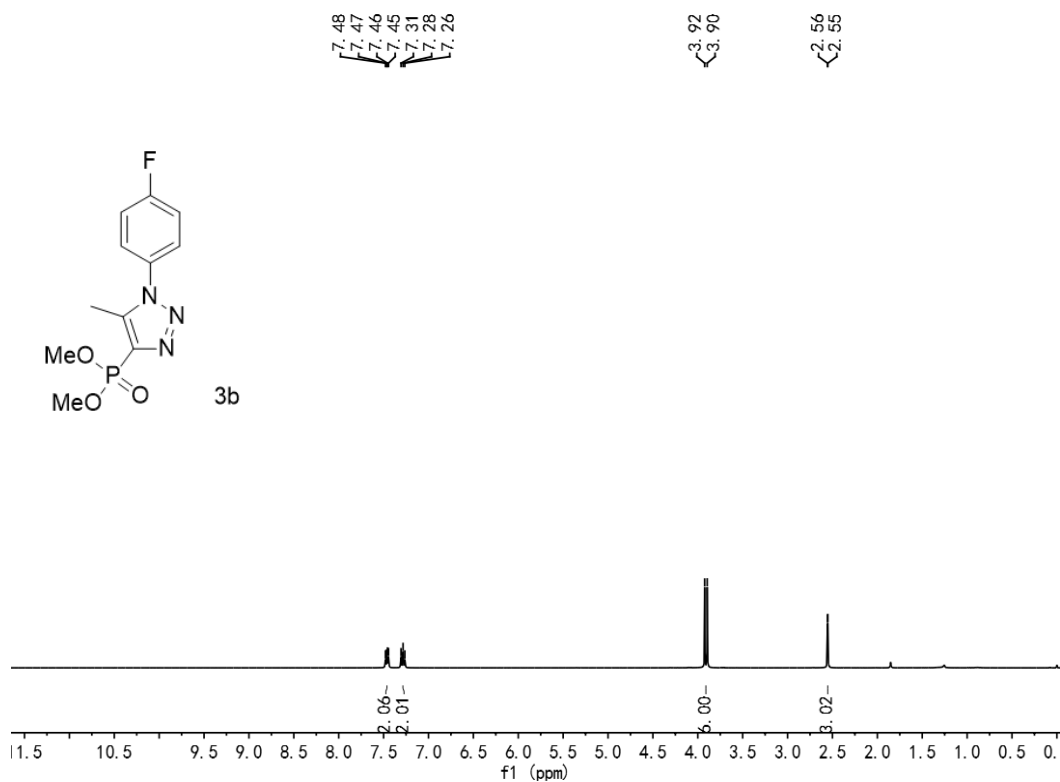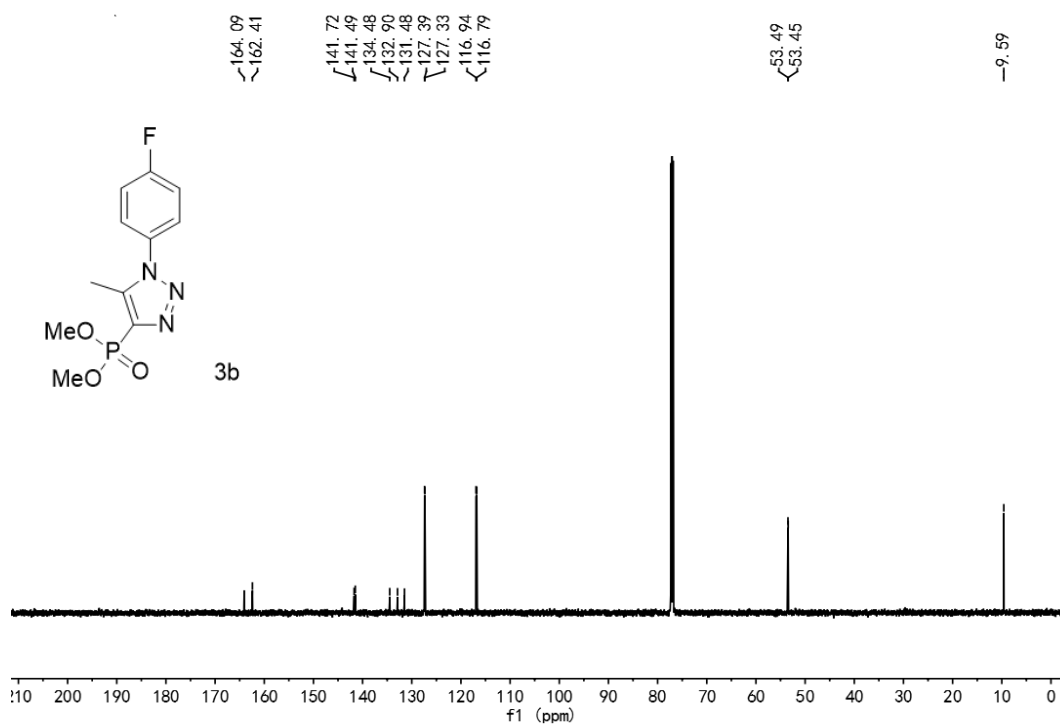

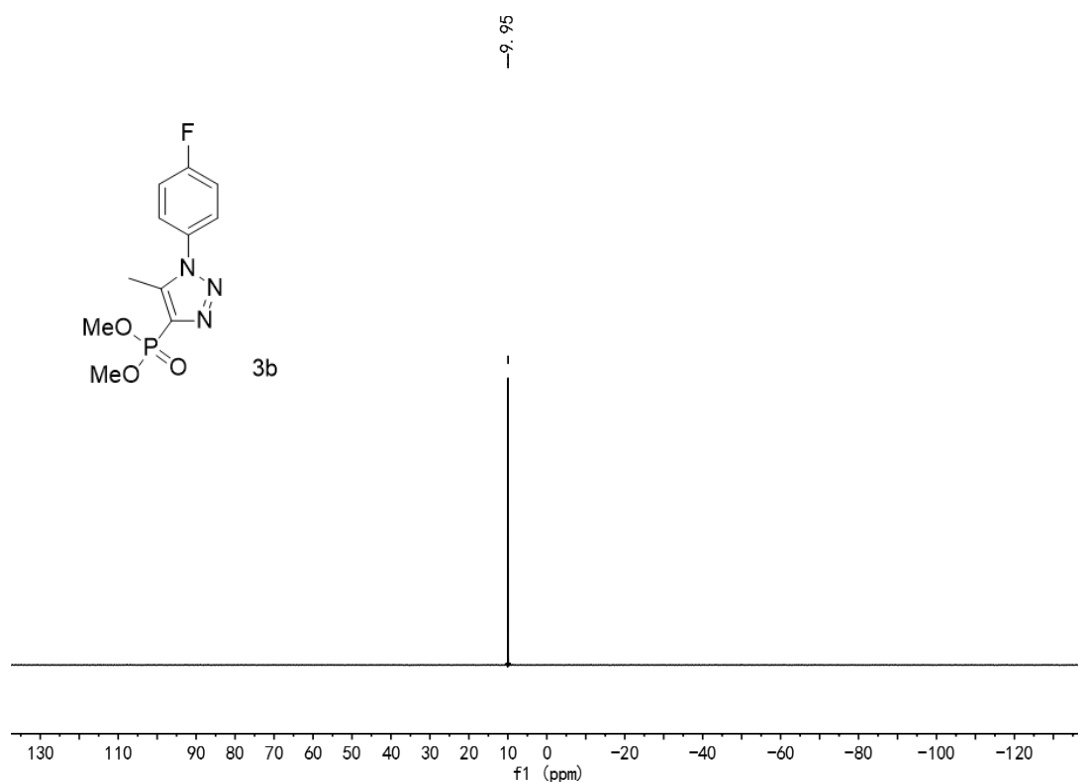

**Dimethyl (1-(2-fluorophenyl)-5-methyl-1H-1,2,3-triazol-4-yl)phosphonate (3c)**

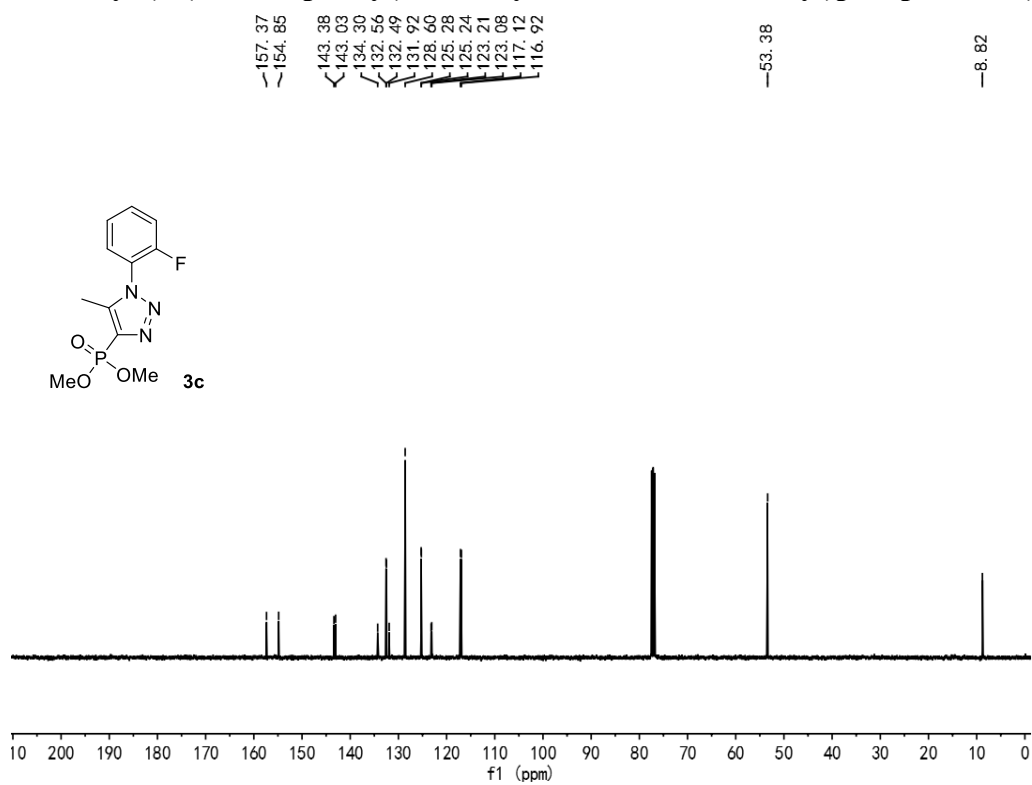

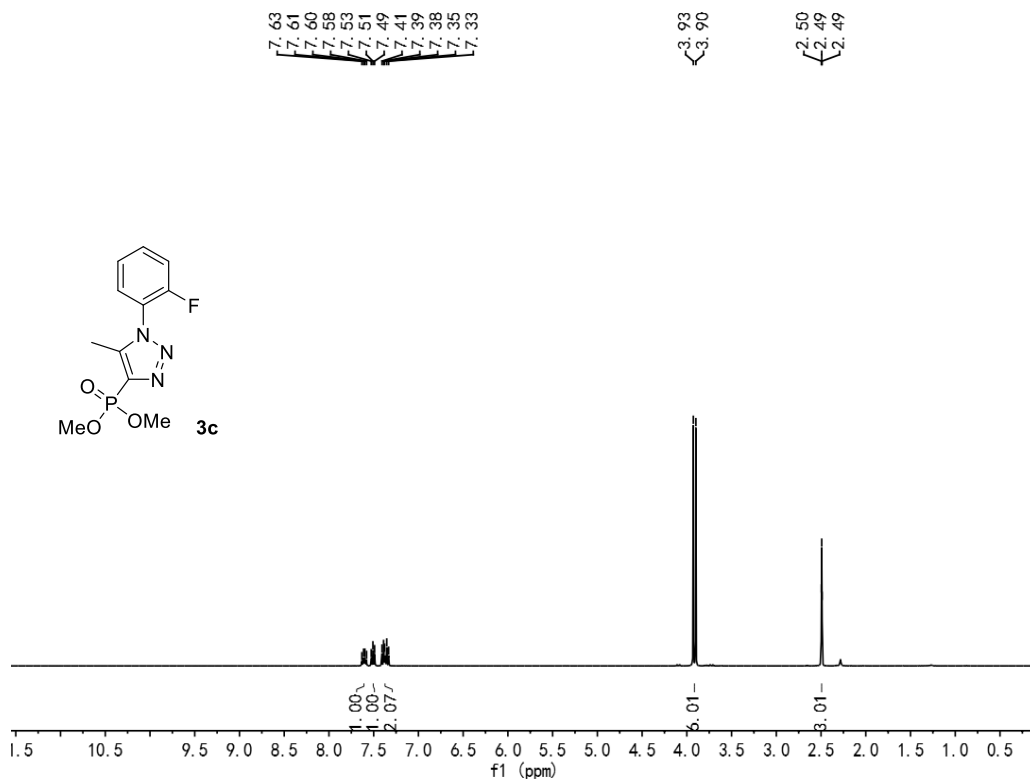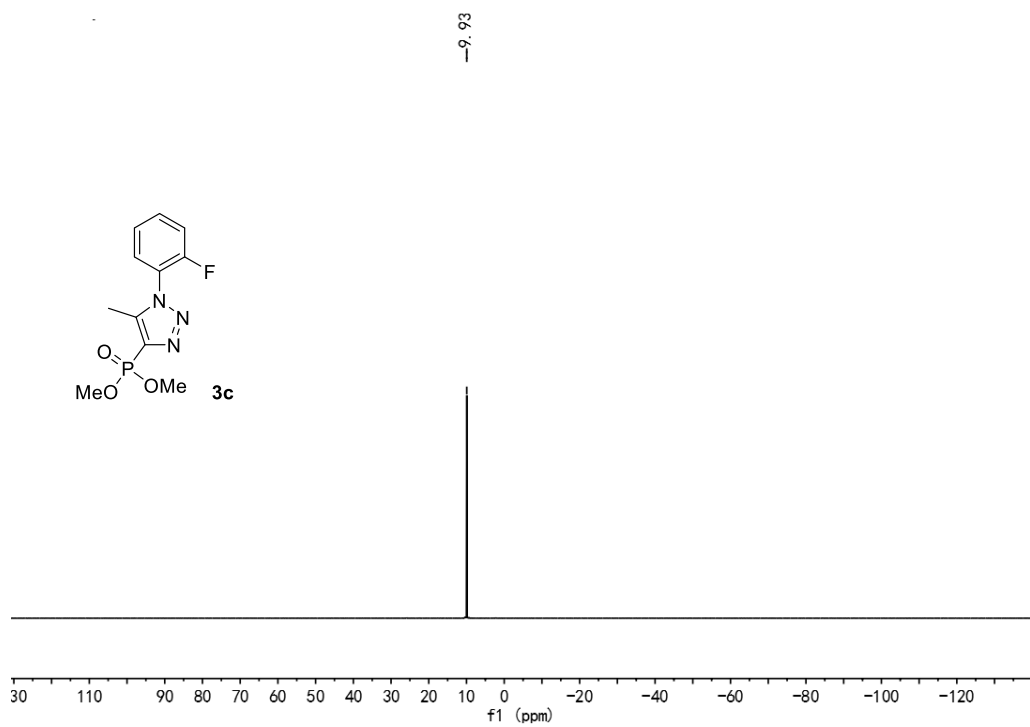

**Dimethyl (1-(3-fluorophenyl)-5-methyl-1H-1,2,3-triazol-4-yl)phosphonate (3d)**

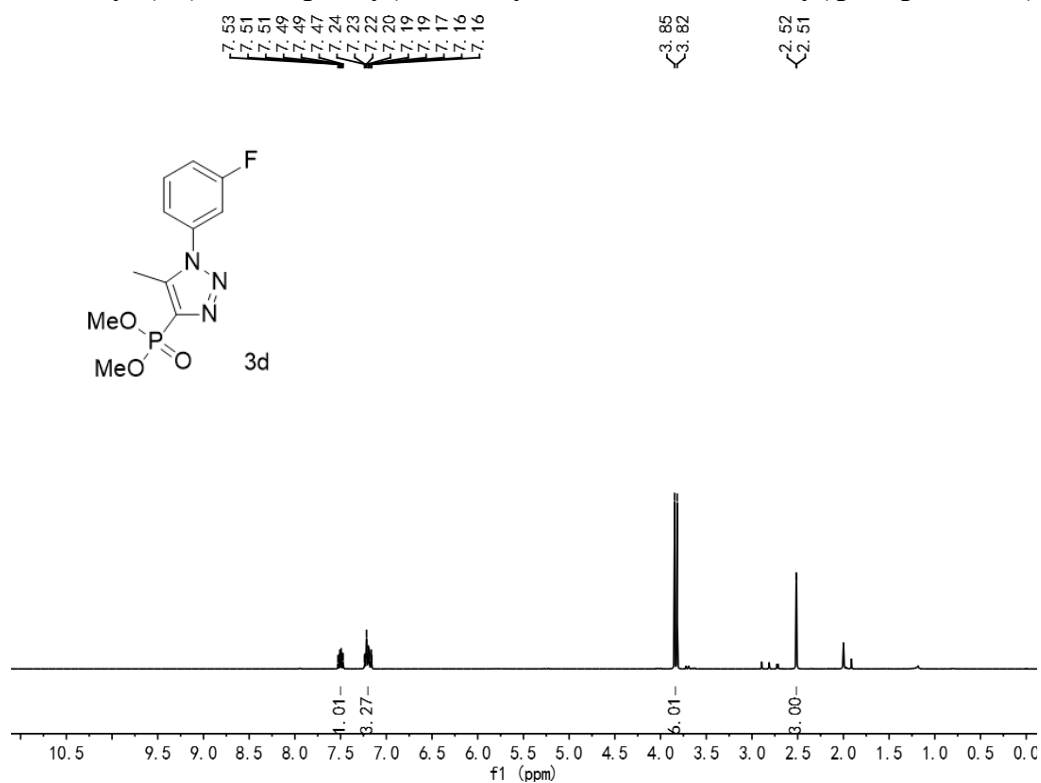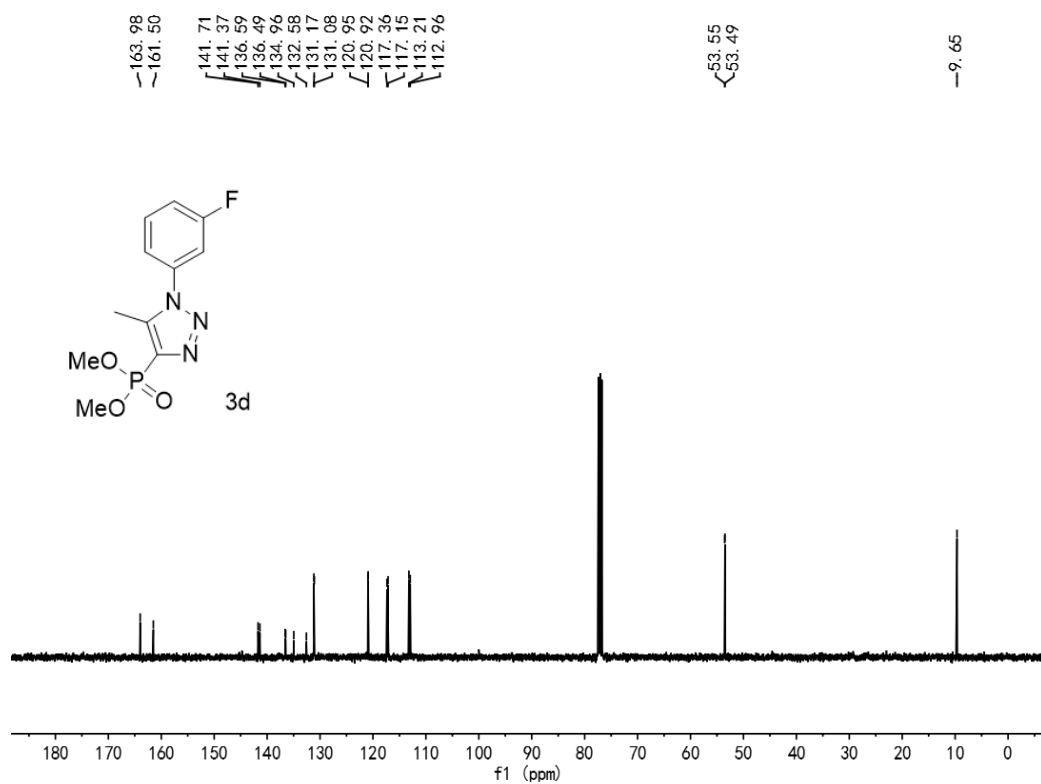



-9.84

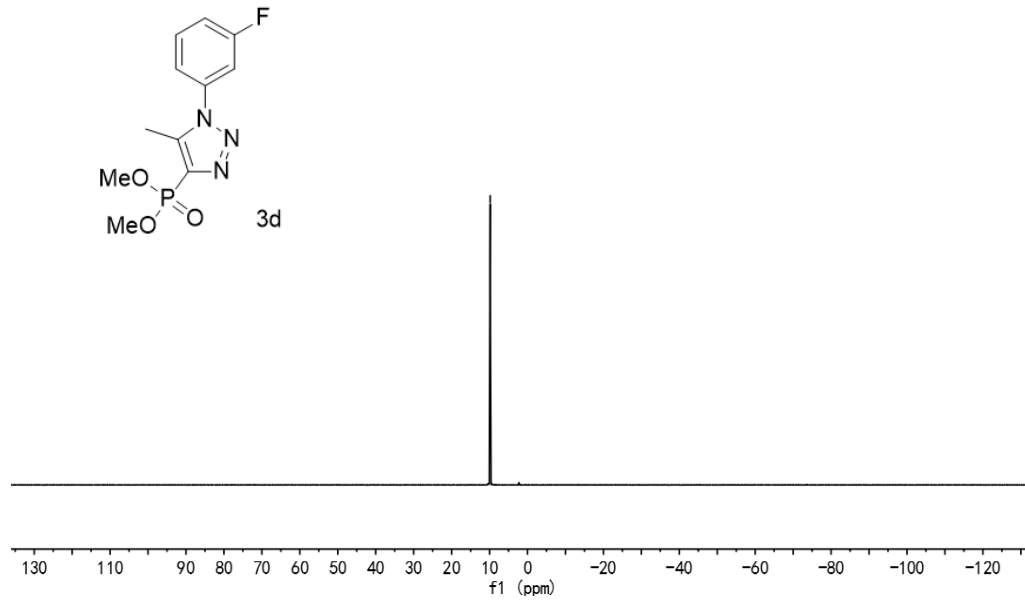

**Dimethyl (1-(2-chlorophenyl)-5-methyl-1H-1,2,3-triazol-4-yl)phosphonate (3e)**

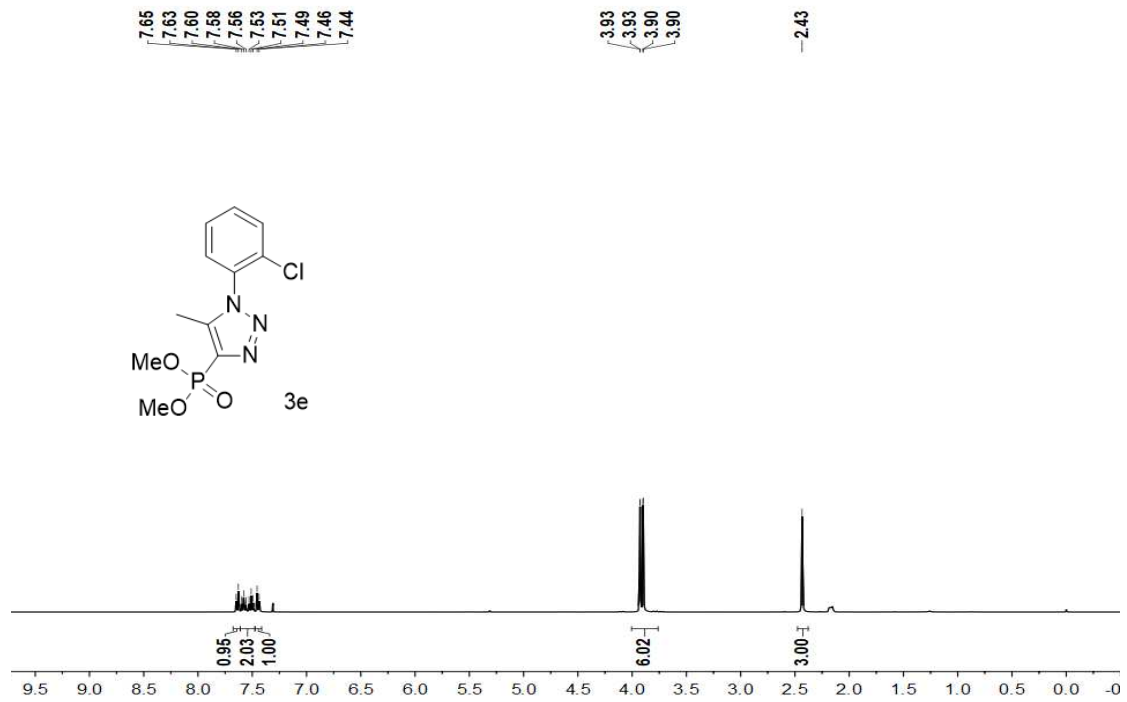

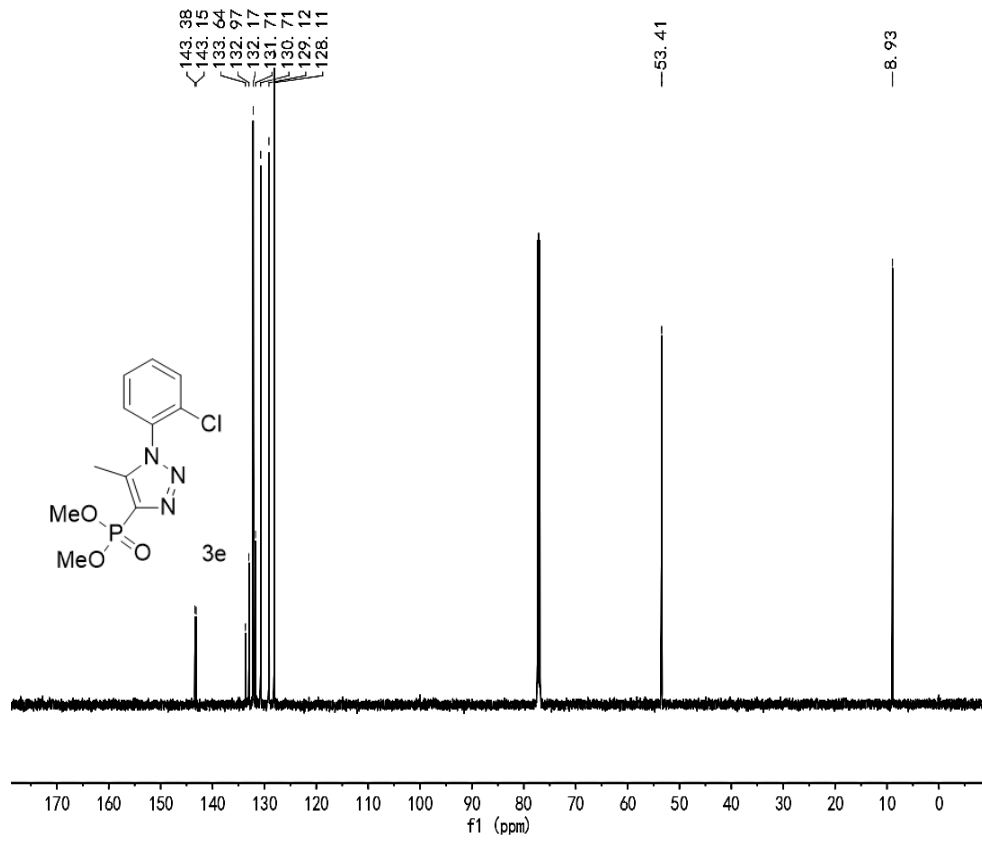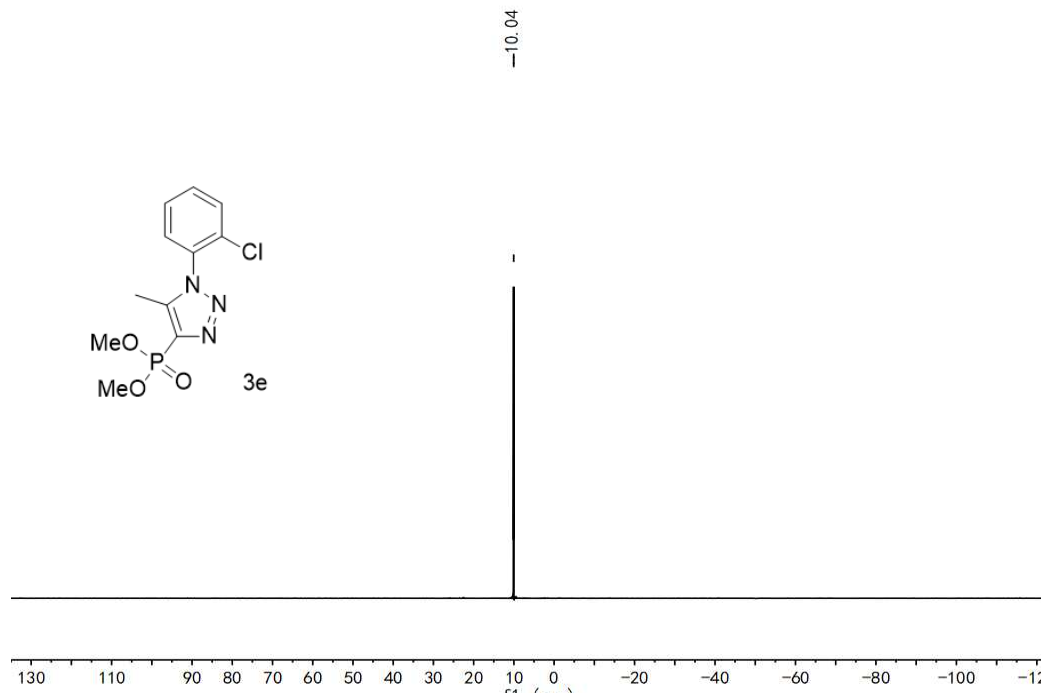

# Dimethyl (1-(3-chlorophenyl)-5-methyl-1H-1,2,3-triazol-4-yl)phosphonate (3f)

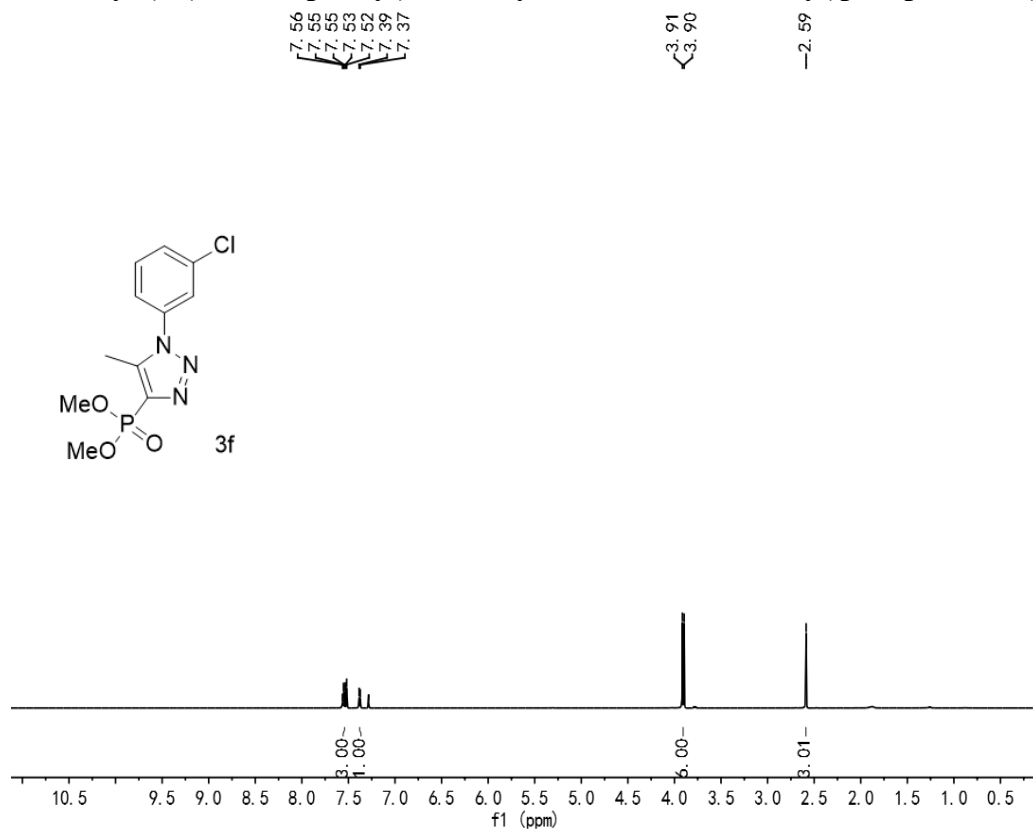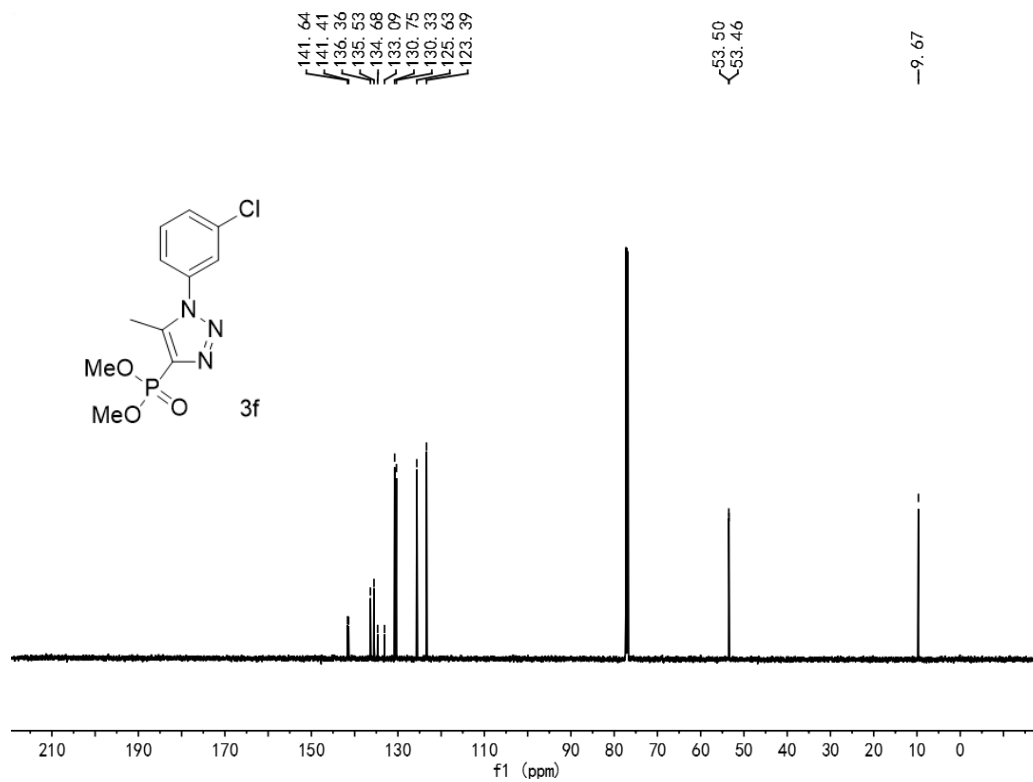

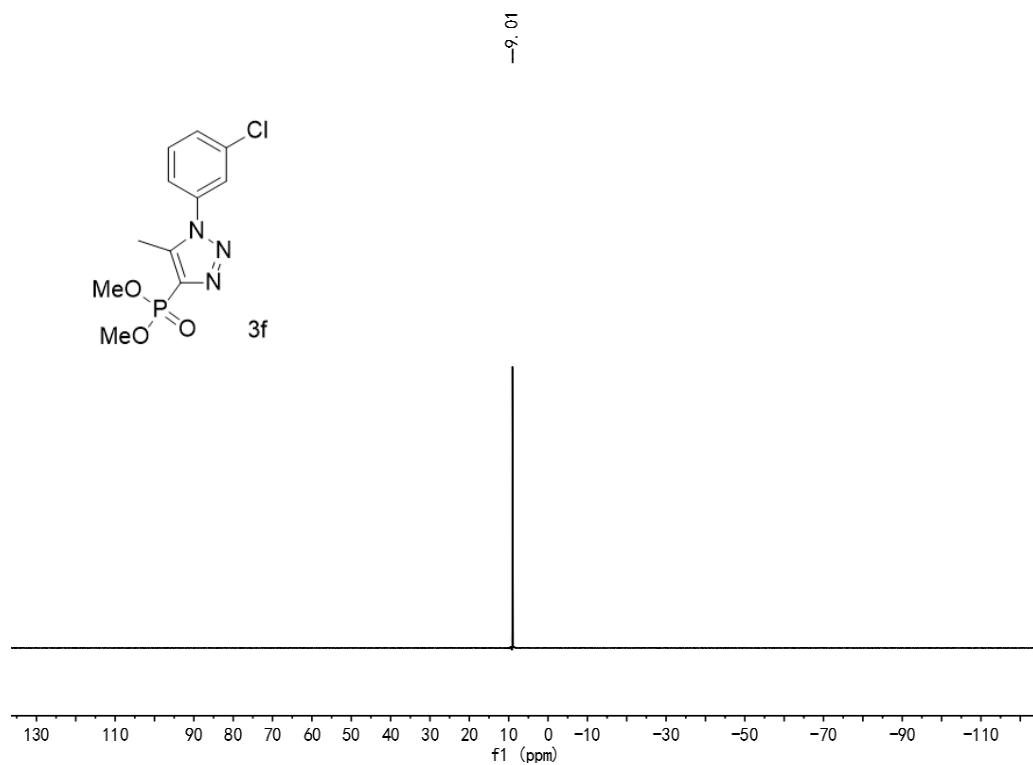

**Dimethyl (1-(4-chlorophenyl)-5-methyl-1H-1,2,3-triazol-4-yl)phosphonate (3g)**

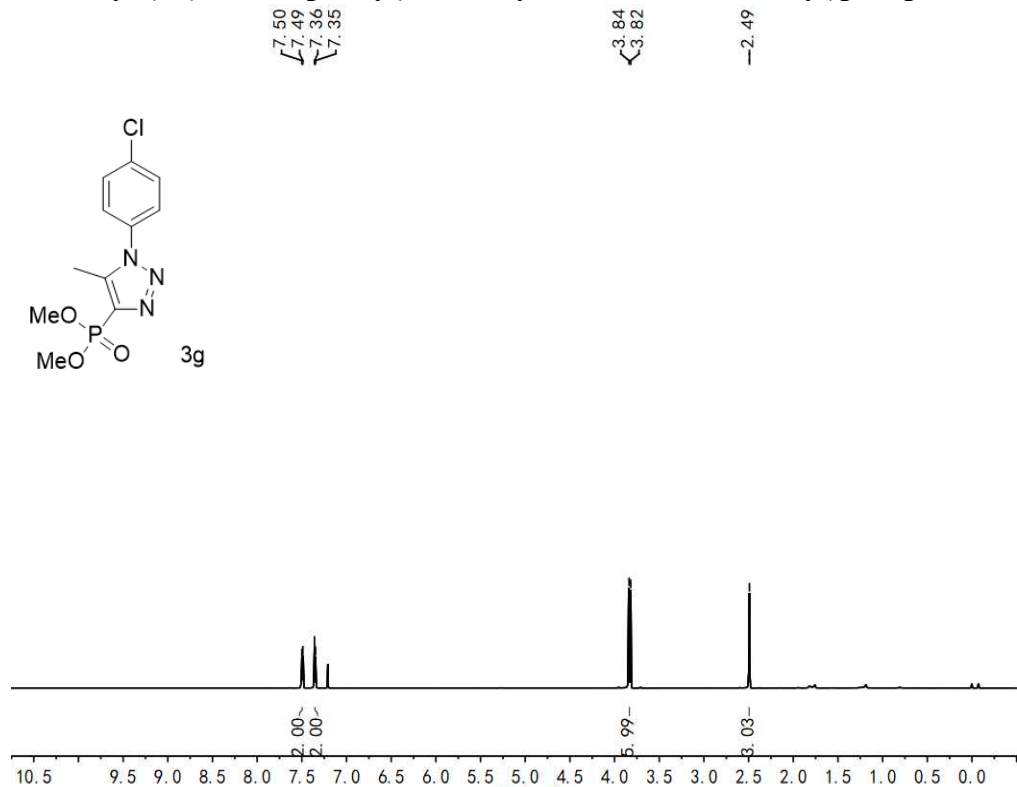

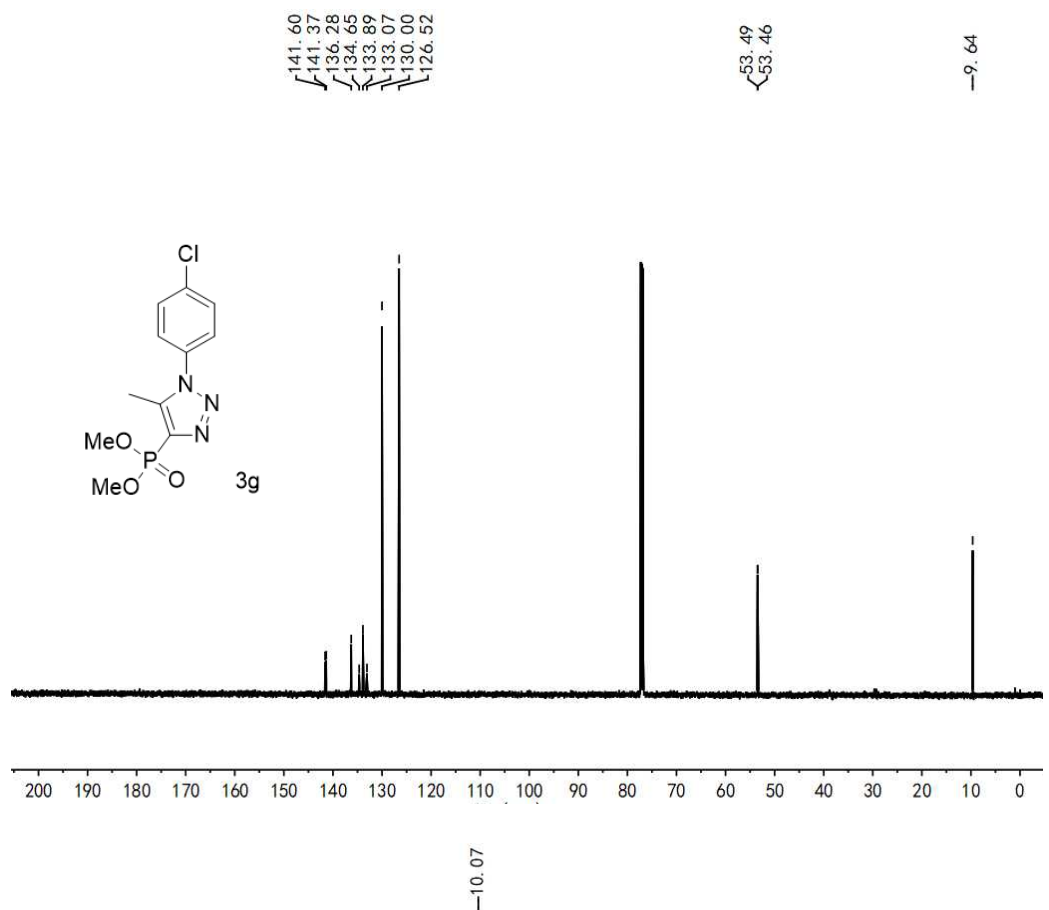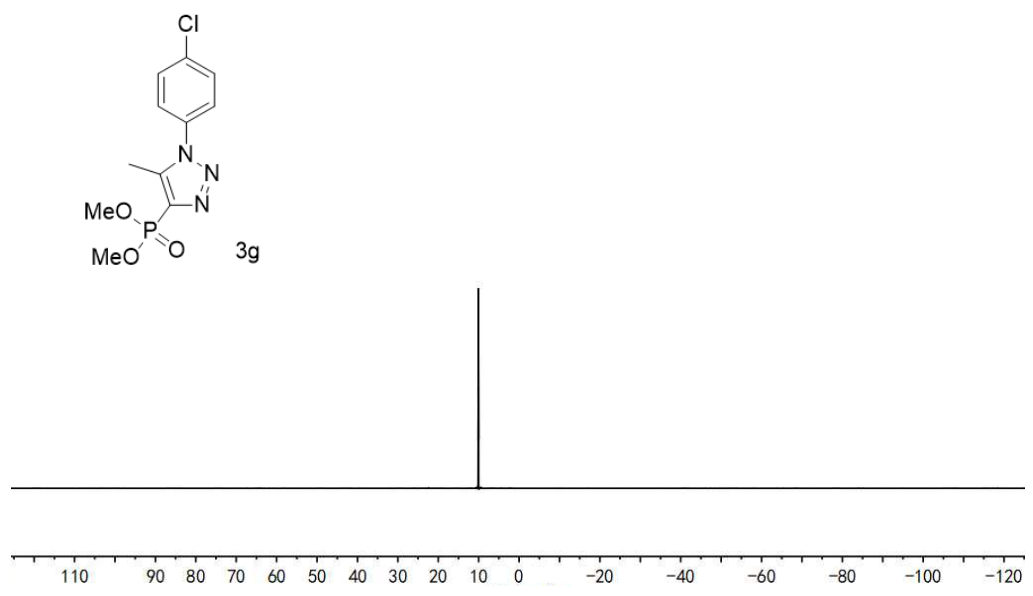

# Dimethyl (1-(3-bromophenyl)-5-methyl-1H-1,2,3-triazol-4-yl)phosphonate (3h)

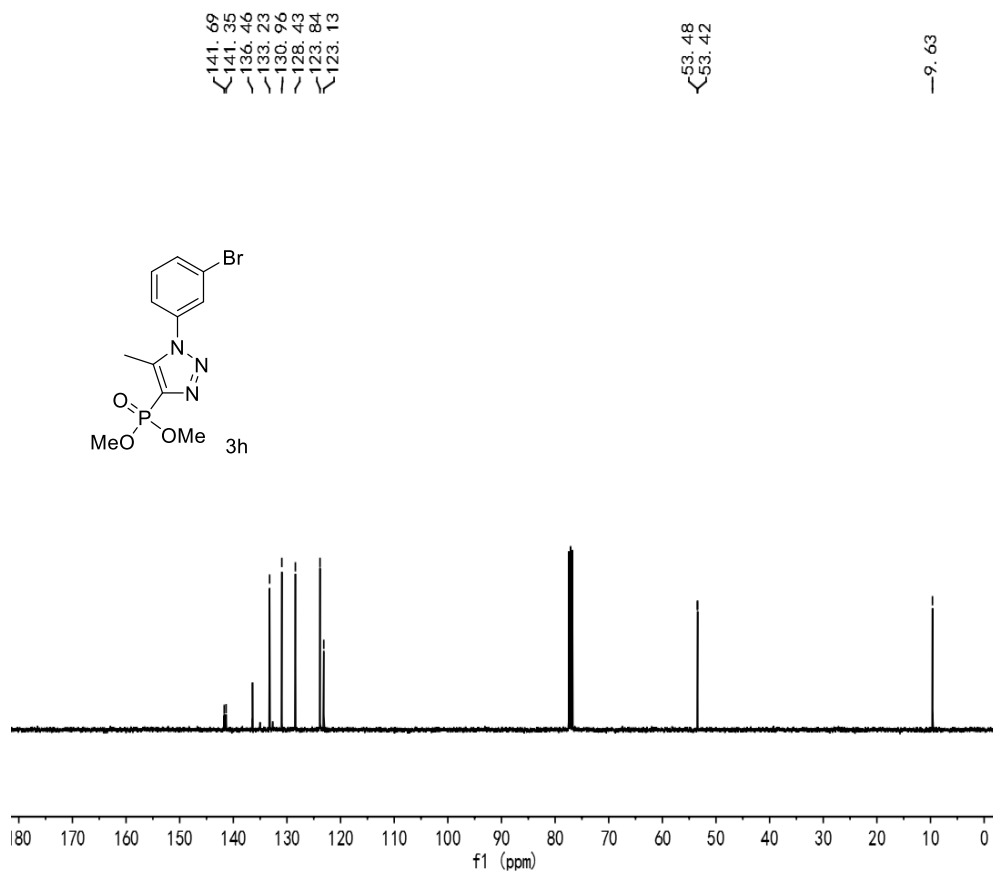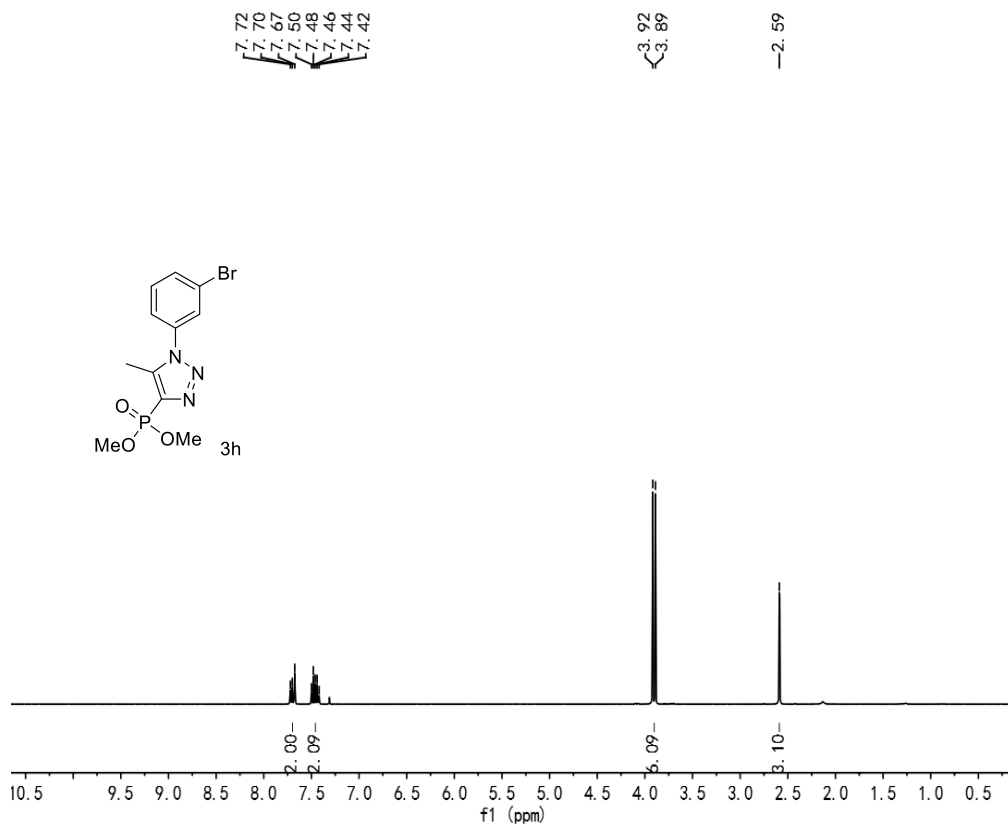

-9.74

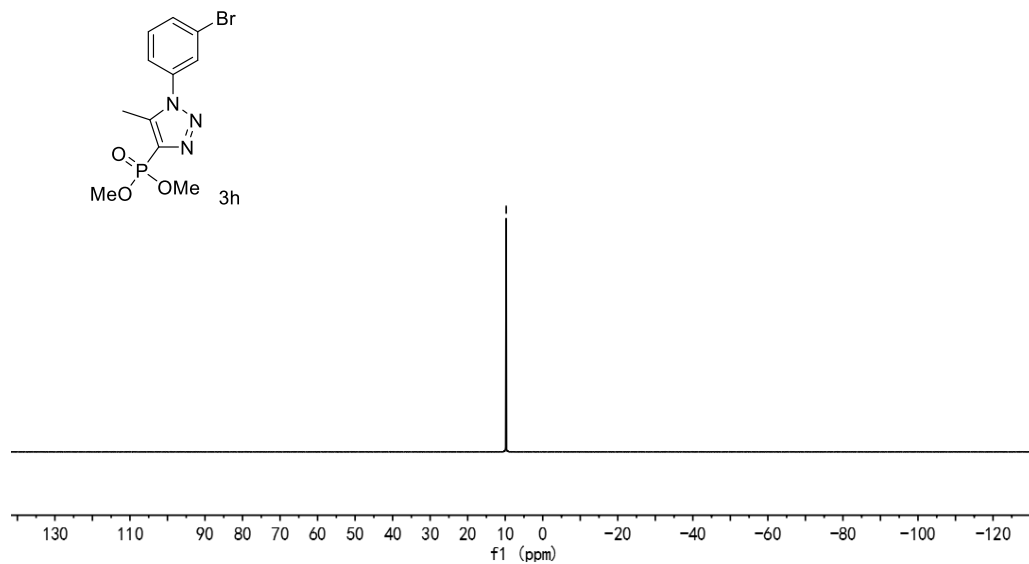

**Dimethyl(1-(4-bromophenyl)-5-methyl-1H-1,2,3-triazol-4-yl)phosphonate (3i)**

7.74, 7.72, 7.38, 7.35, 3.92, 3.89, 2.57, 2.57

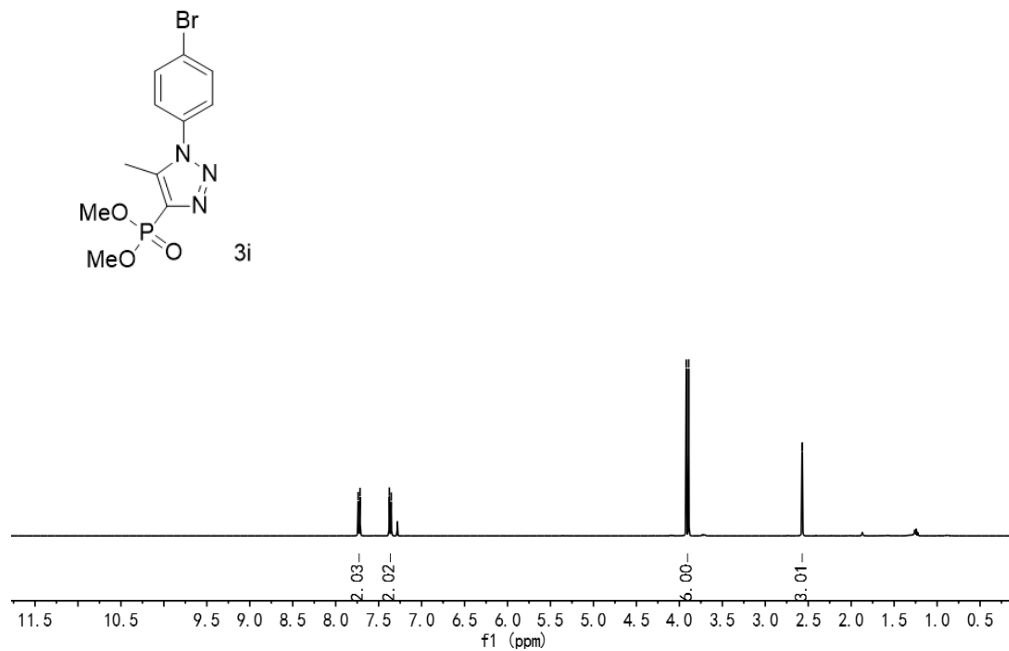

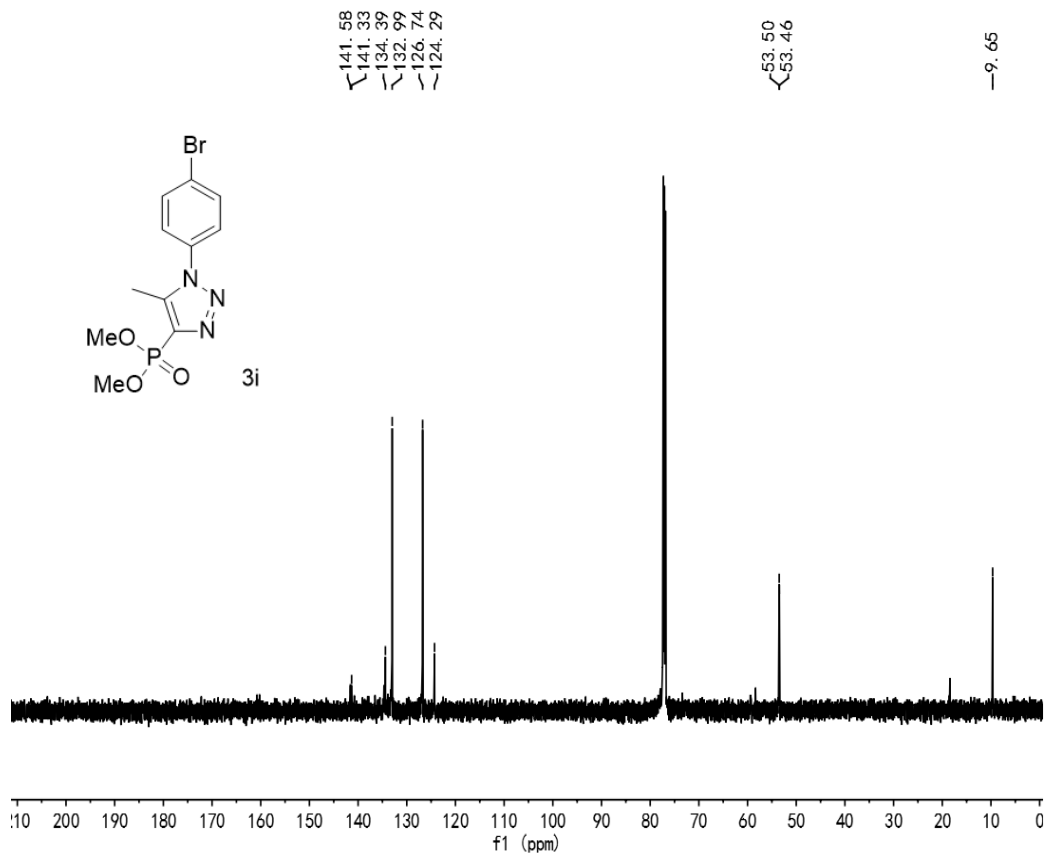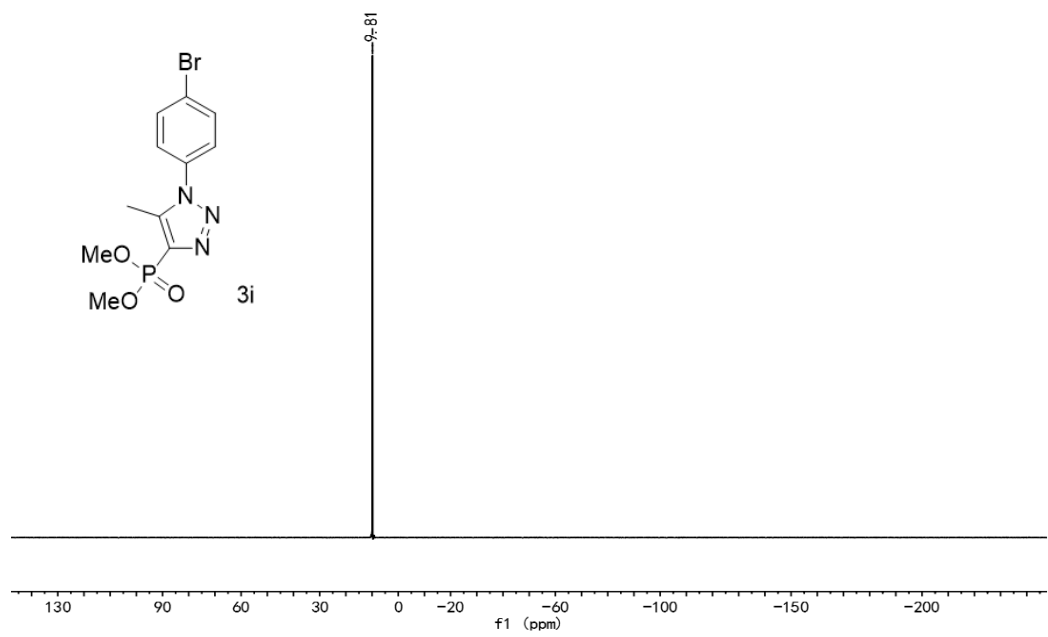



# Dimethyl(1-(2-iodophenyl)-5-methyl-1H-1,2,3-triazol-4-yl)phosphonate (3j)

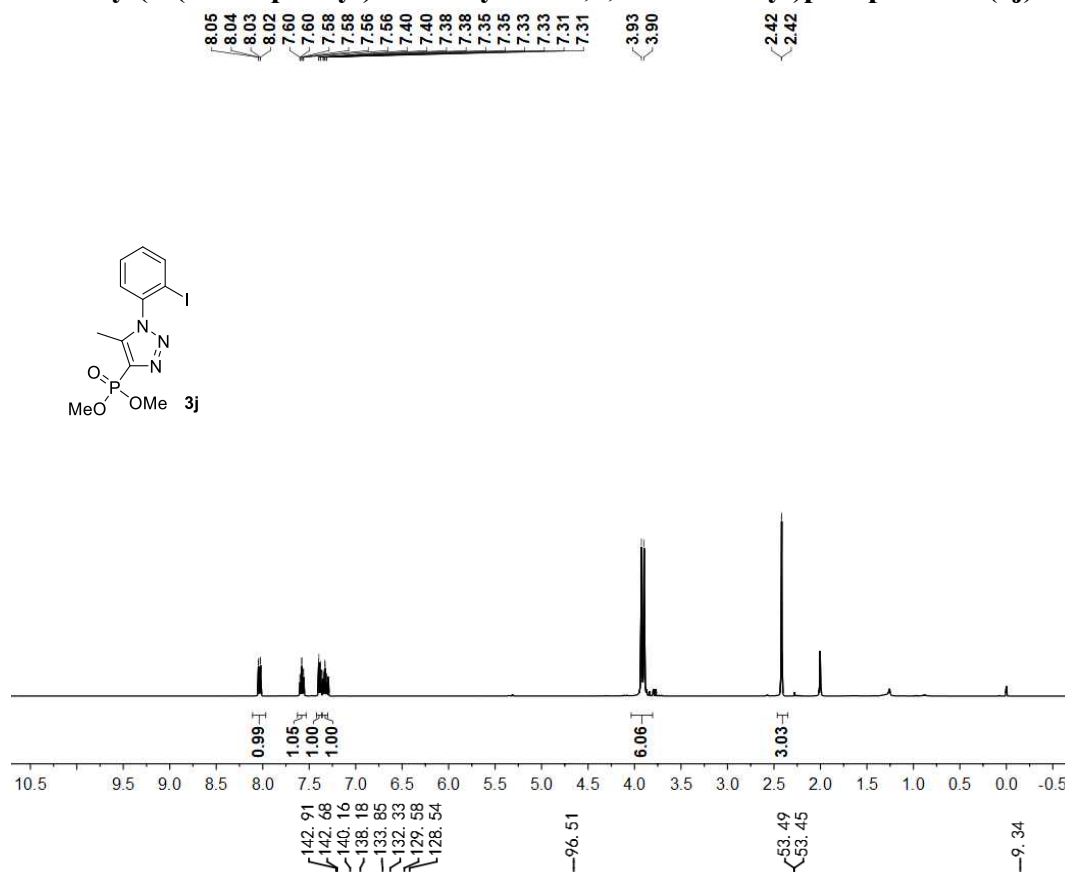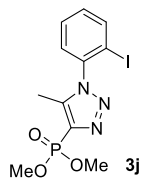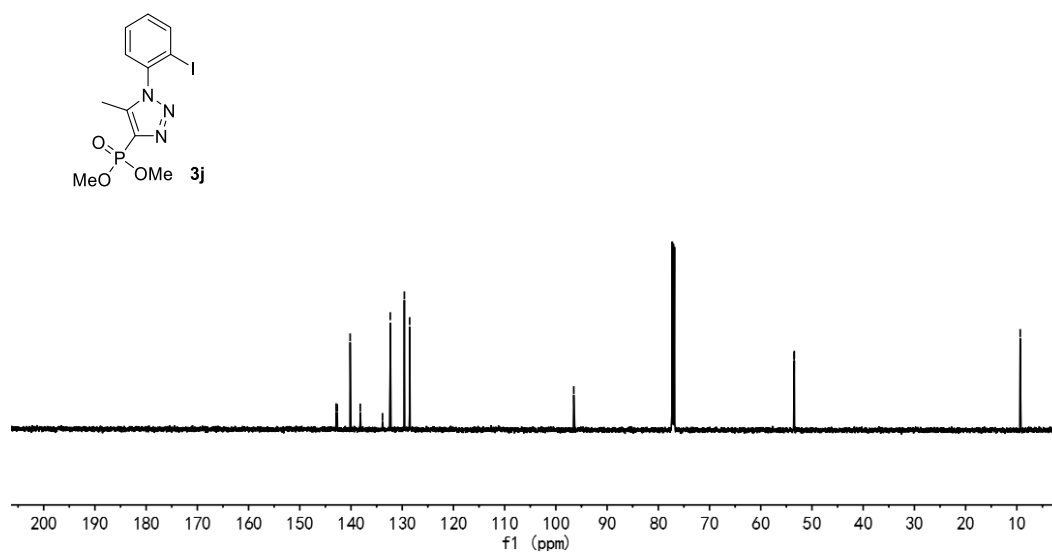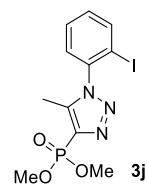

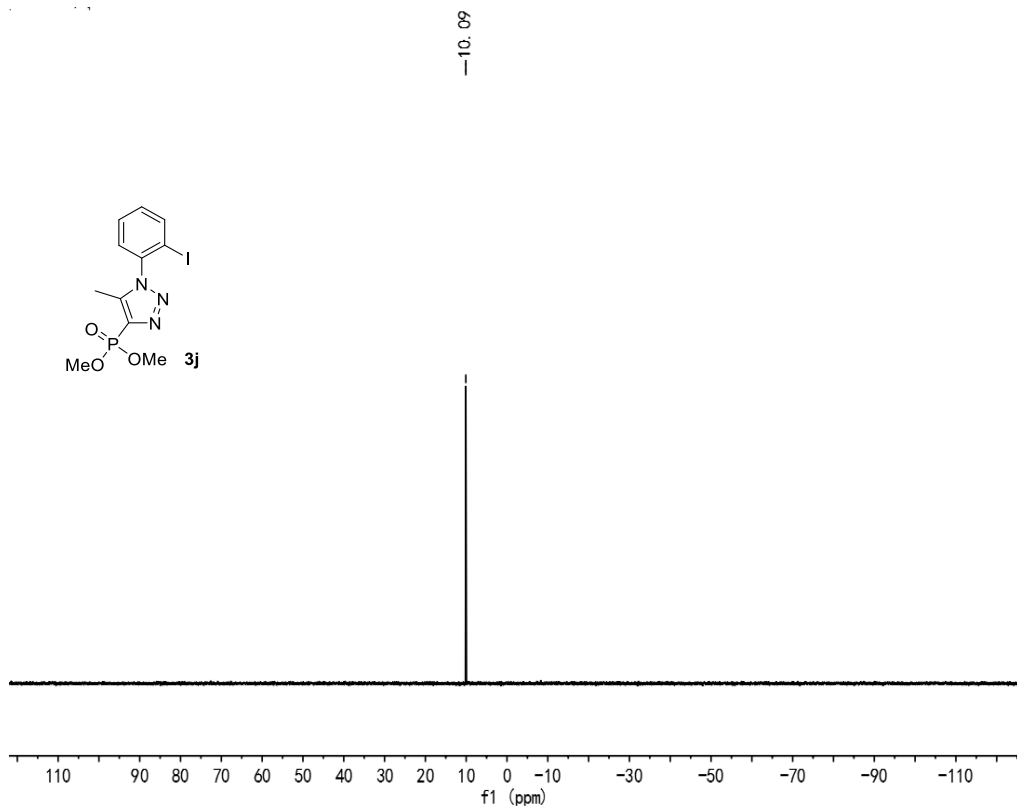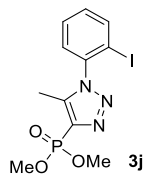

**Dimethyl(5-methyl-1-phenyl-1H-1,2,3-triazol-4-yl)phosphonate (3k)**

7.60 7.58 7.48 7.46      3.92 3.90      -2.57

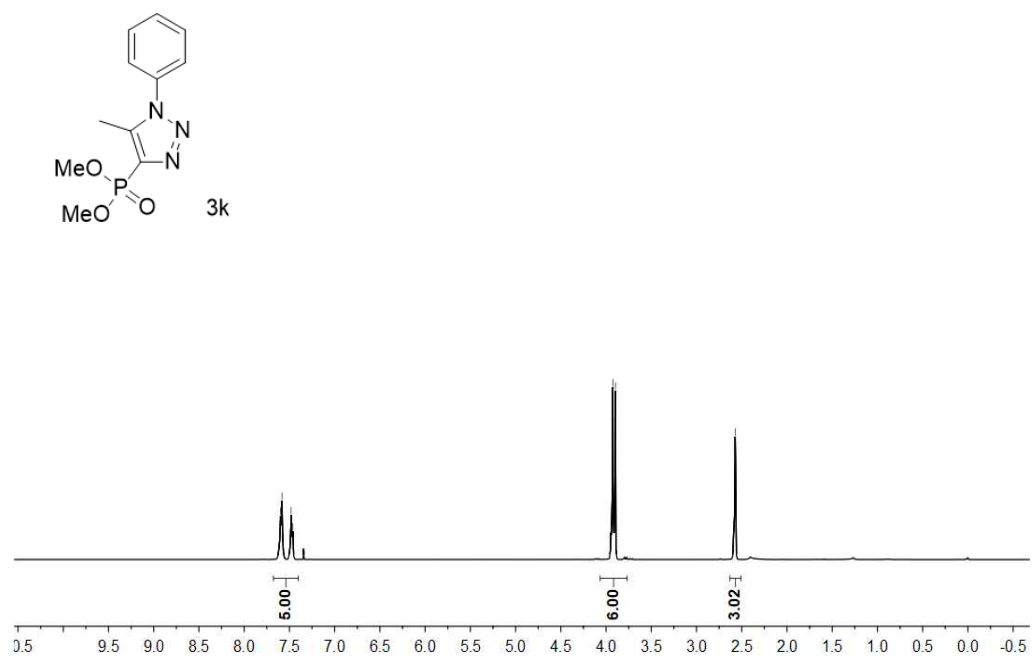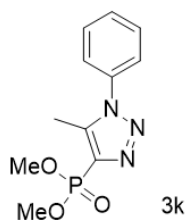

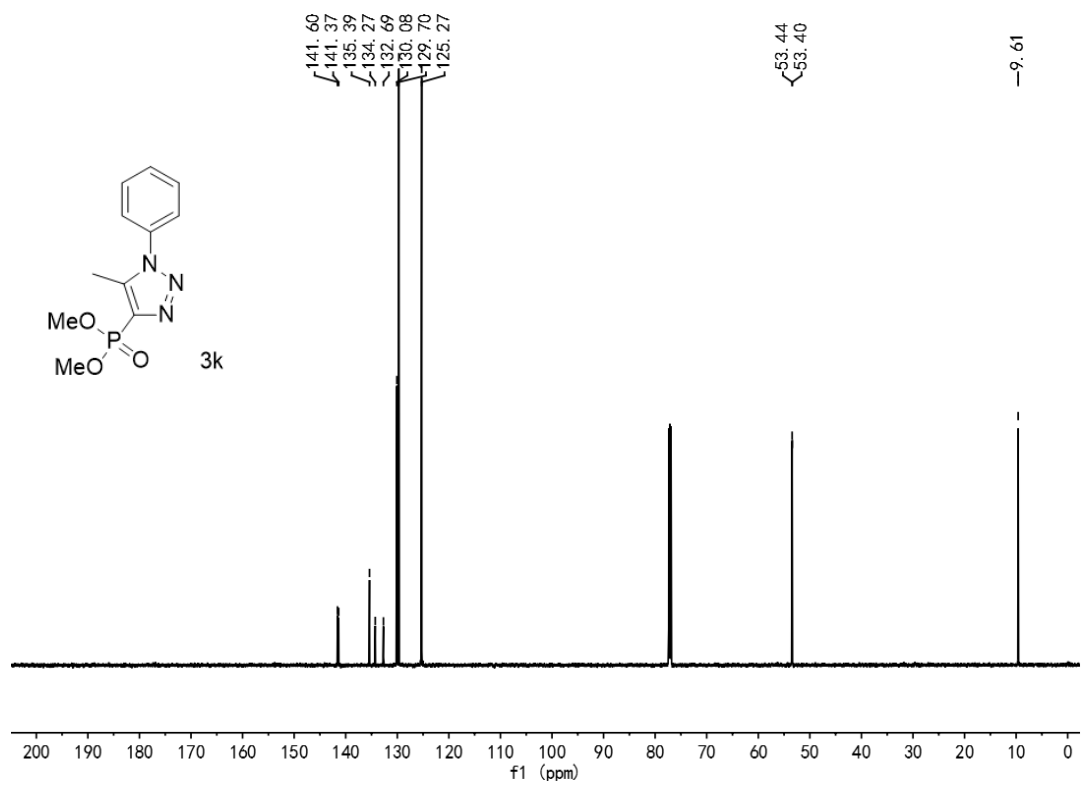

-10.21

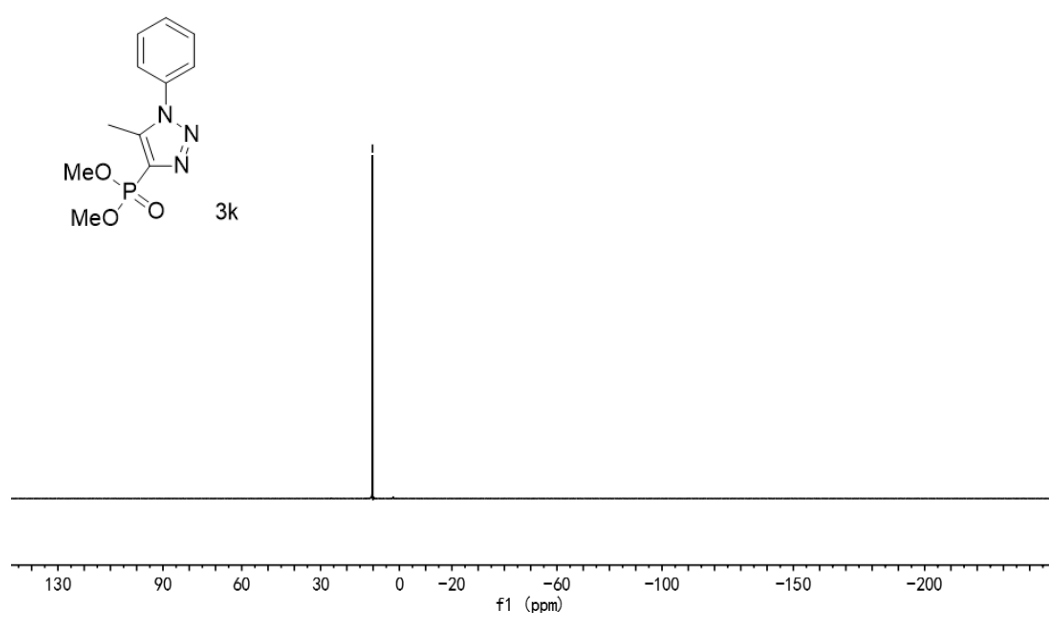

**Dimethyl(5-methyl-1-(4-(trifluoromethyl)phenyl)-1H-1,2,3-triazol-4-yl)phosphonate (3I)**

7.86  
7.84  
7.79  
7.76  
7.74  
7.70  
7.68

3.93  
3.90

-2.61

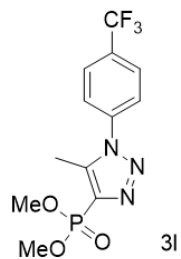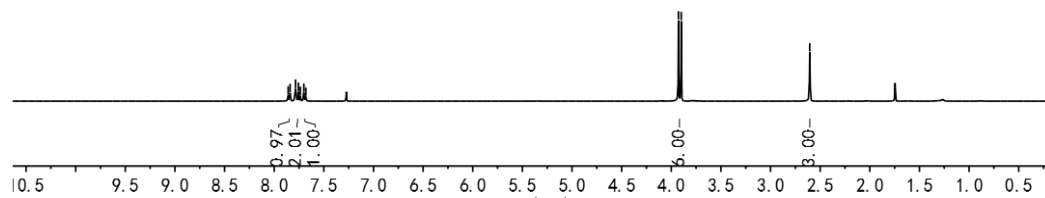

141.68  
141.45  
135.95  
134.97  
133.39  
132.66  
132.44  
130.54  
128.45  
126.88  
124.03  
122.42  
122.39

53.53  
53.49

-9.66

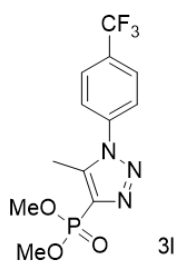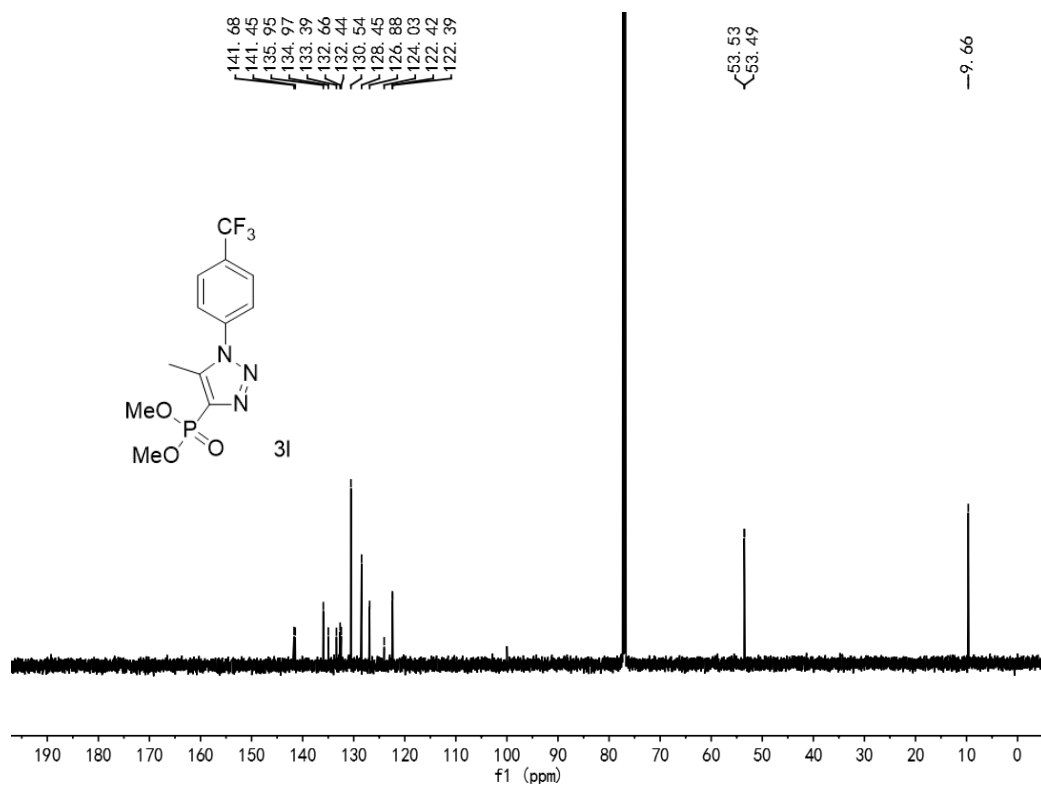

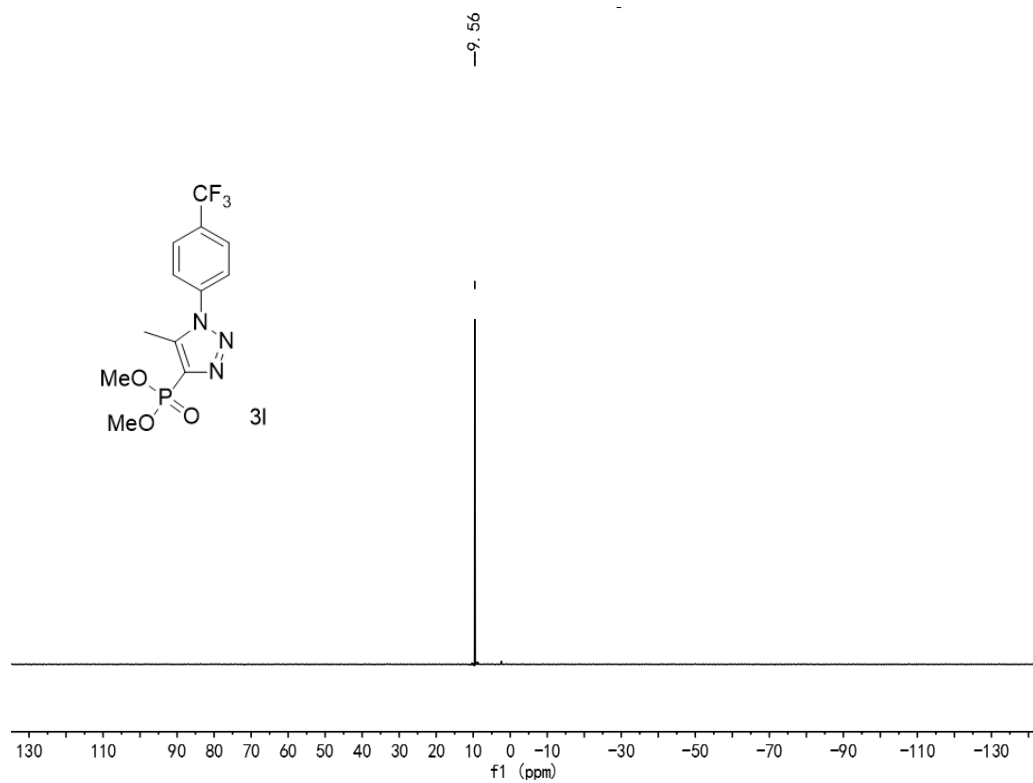

**Dimethyl (5-methyl-1-(4-nitrophenyl)-1H-1,2,3-triazol-4-yl)phosphonate (3m)**

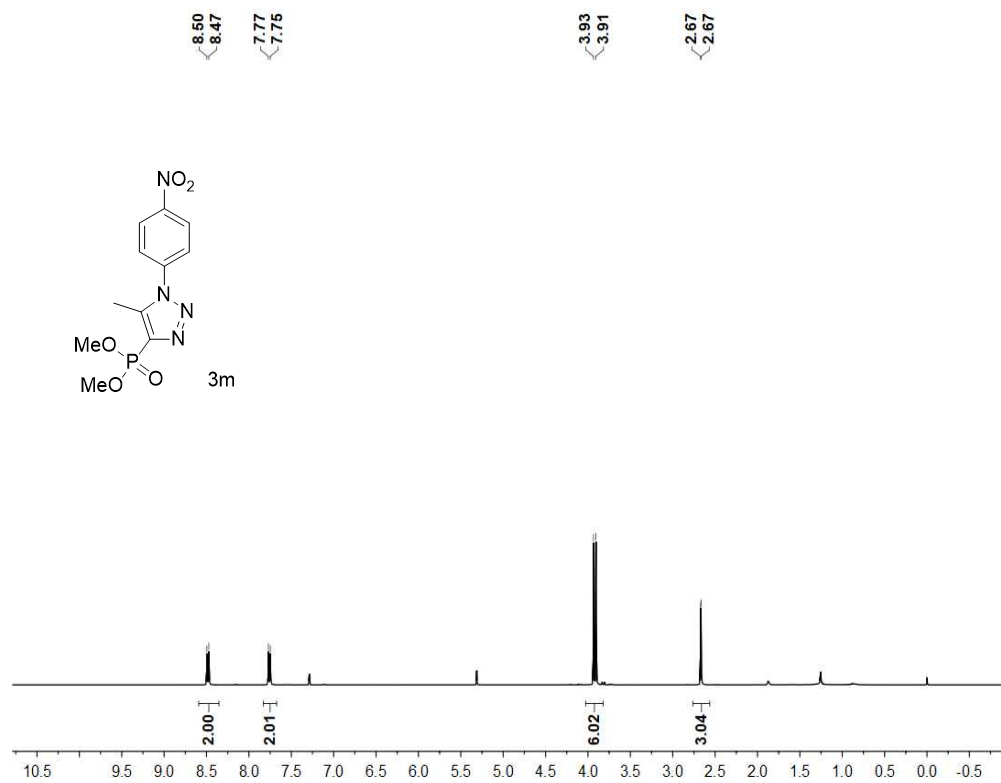

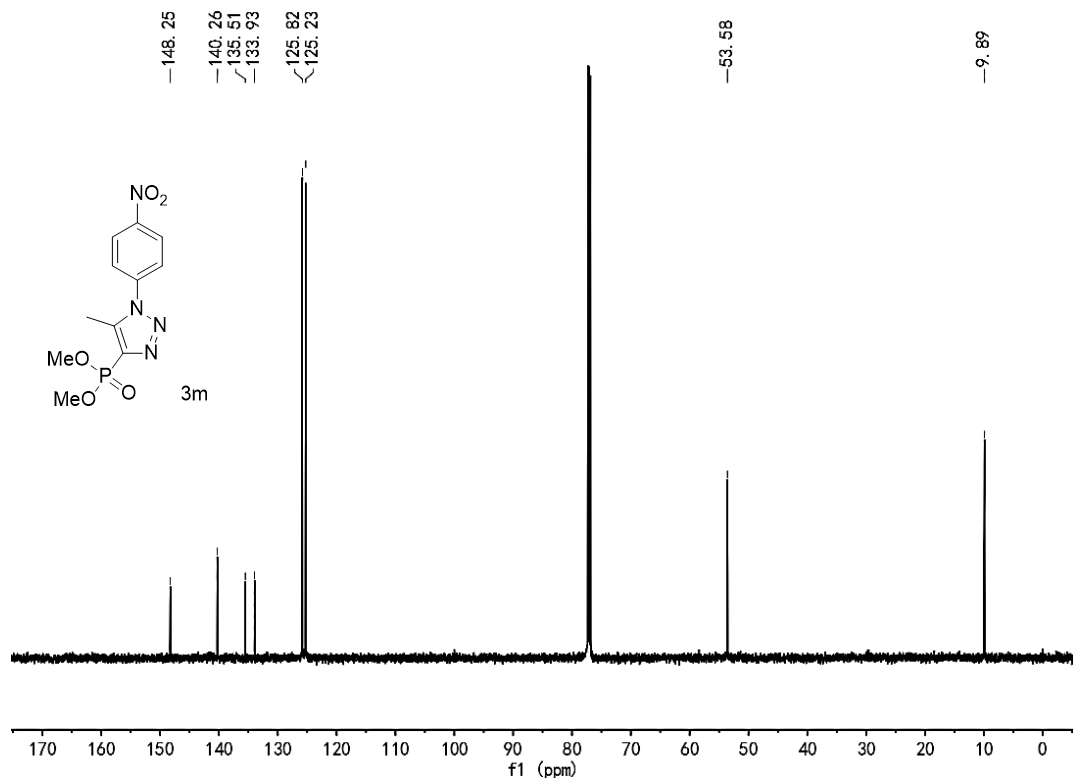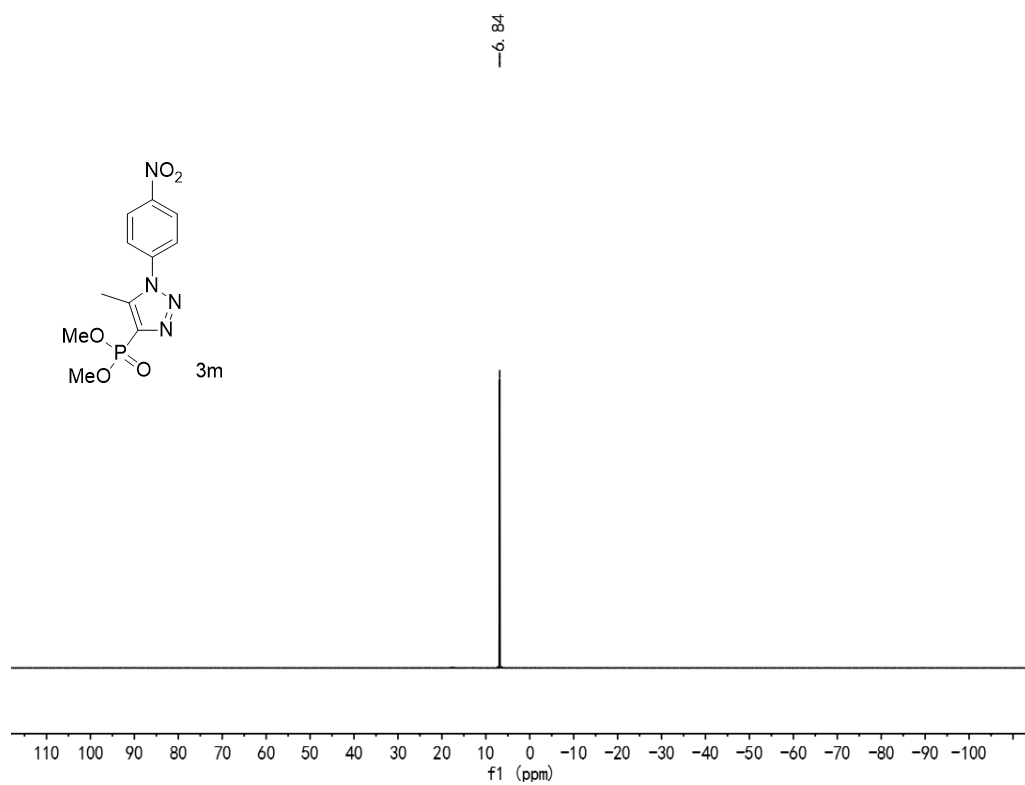

Dimethyl(5-methyl-1-(3-nitrophenyl)-1H-1,2,3-triazol-4-yl)phosphonate (3n)

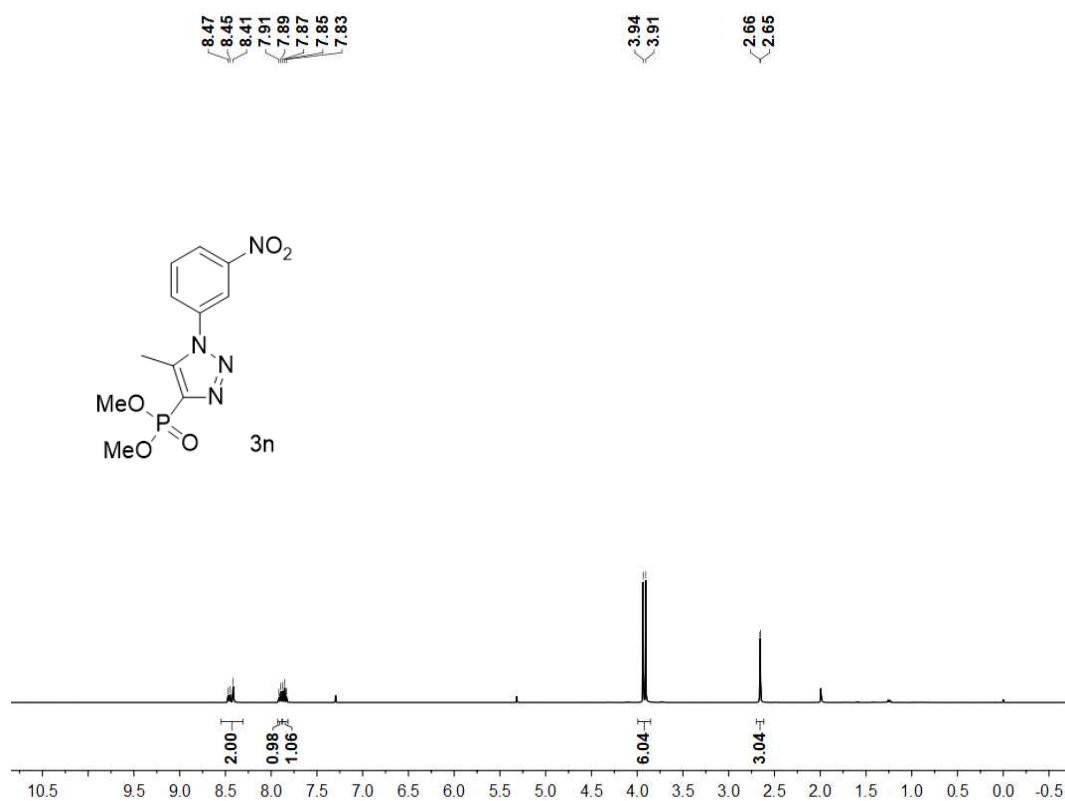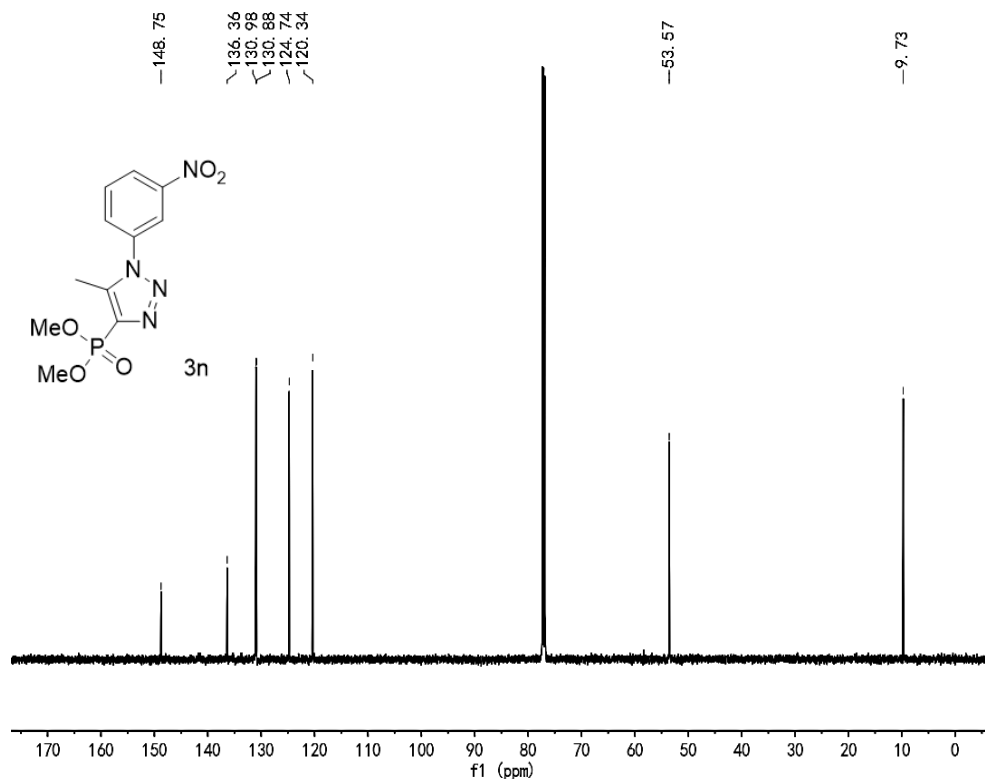

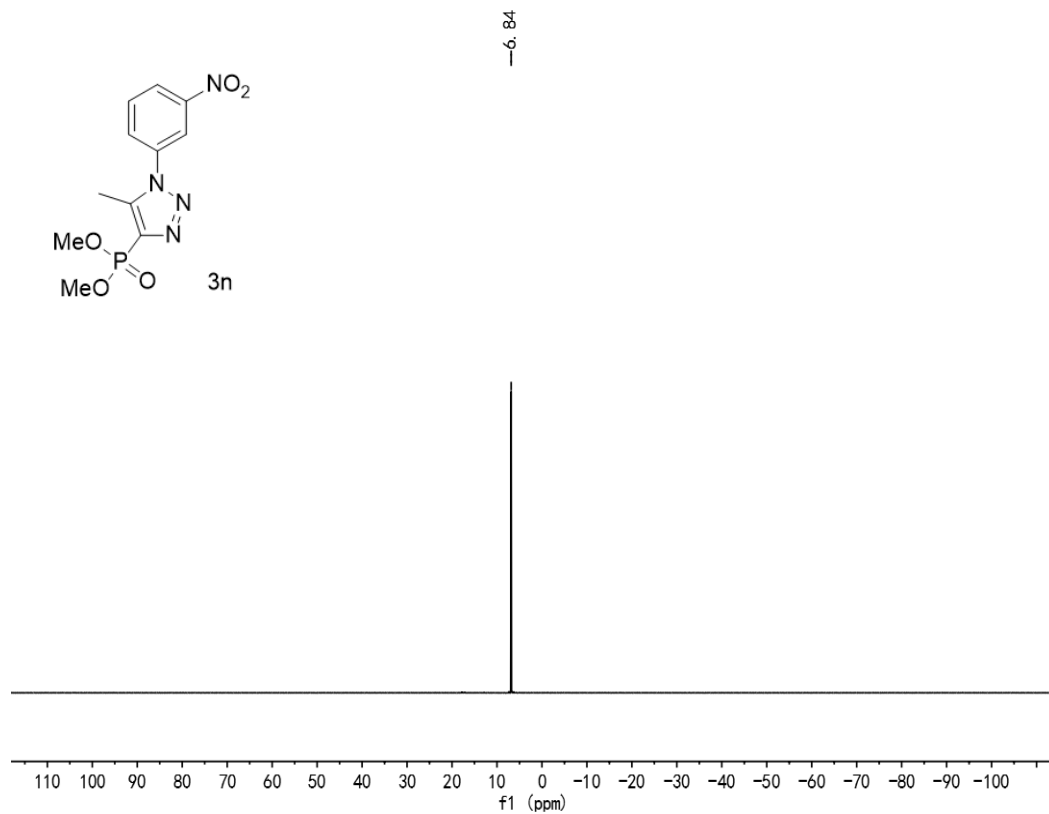

**Butyl 4-(4-(dimethoxyphosphoryl)-5-methyl-1H-1,2,3-triazol-1-yl)benzoate (3o)**

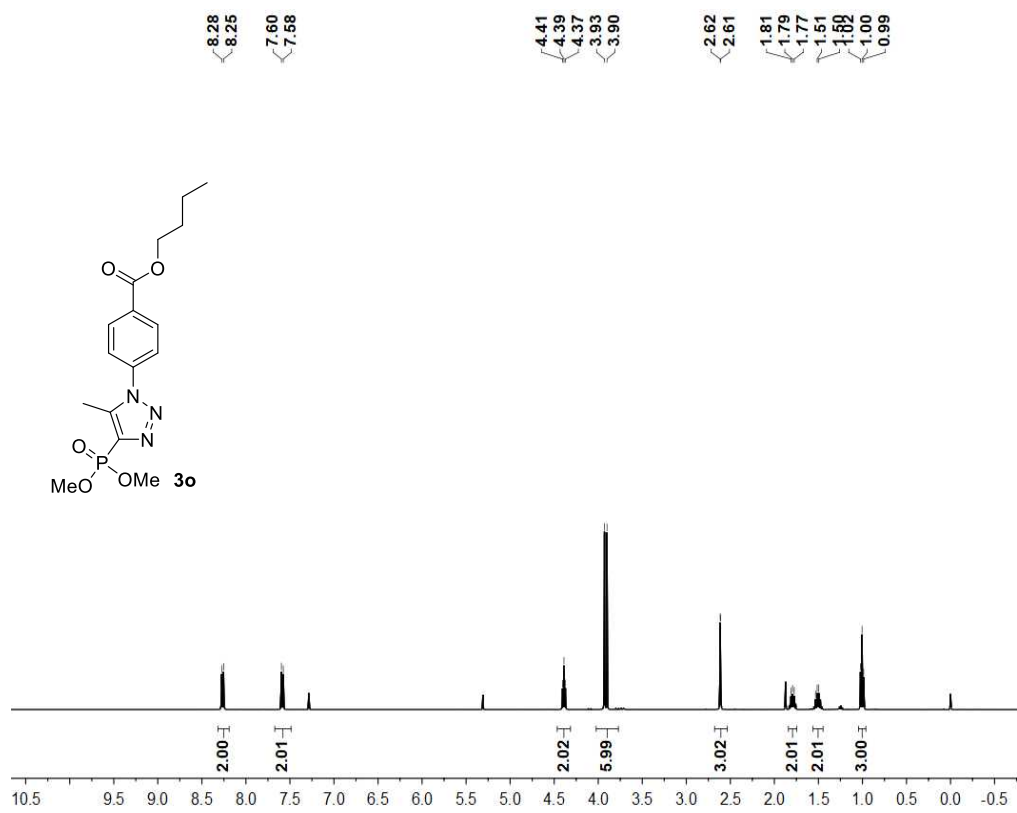



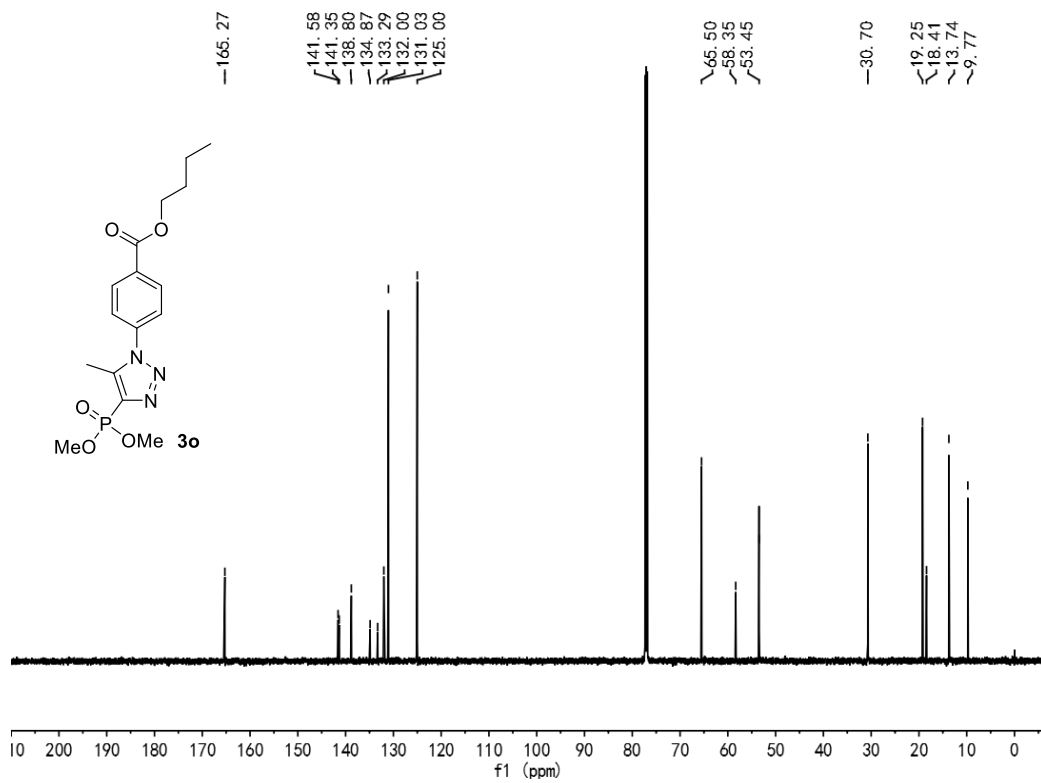

-9.72

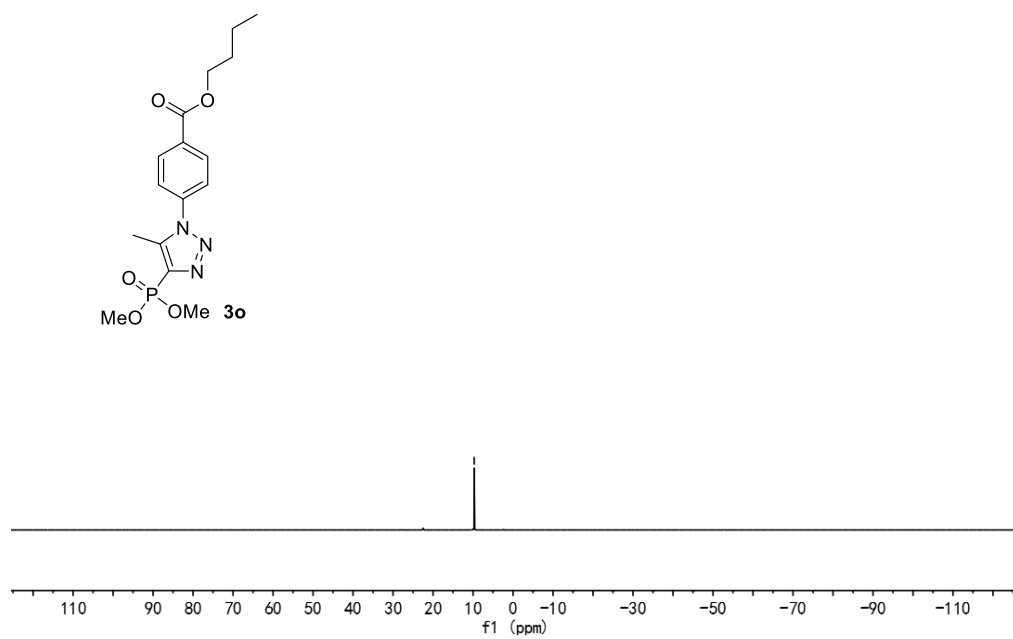

**Dimethyl(5-methyl-1-(naphthalen-1-yl)-1H-1,2,3-triazol-4-yl)phosphonate (3p)**

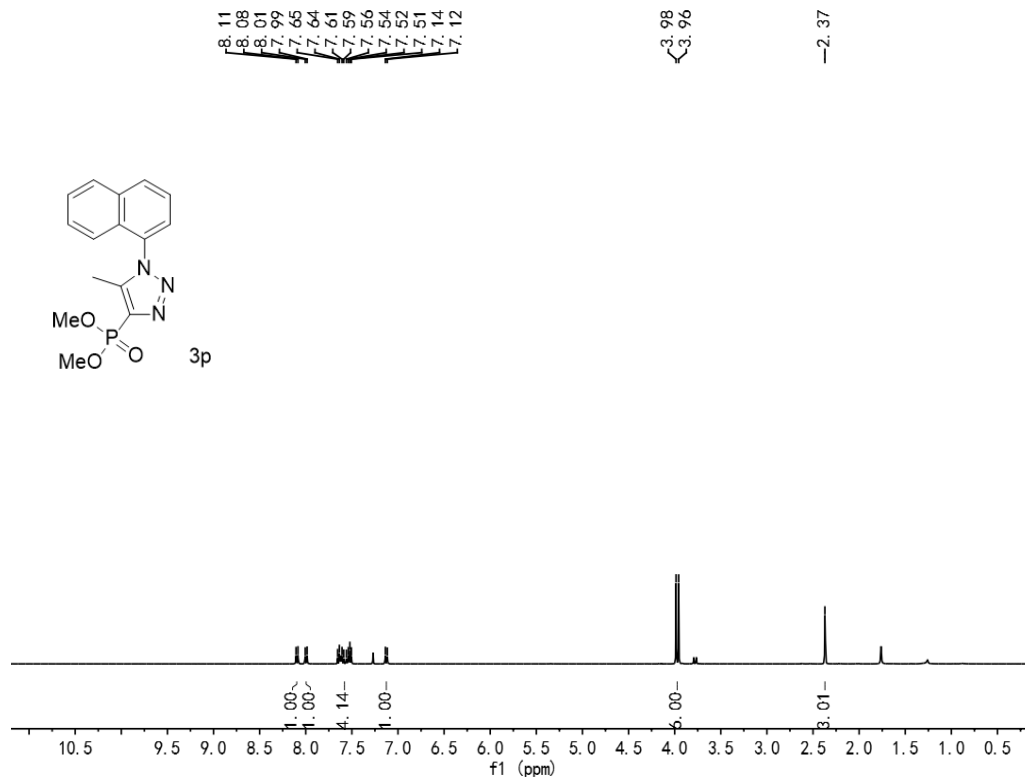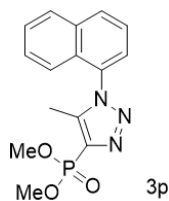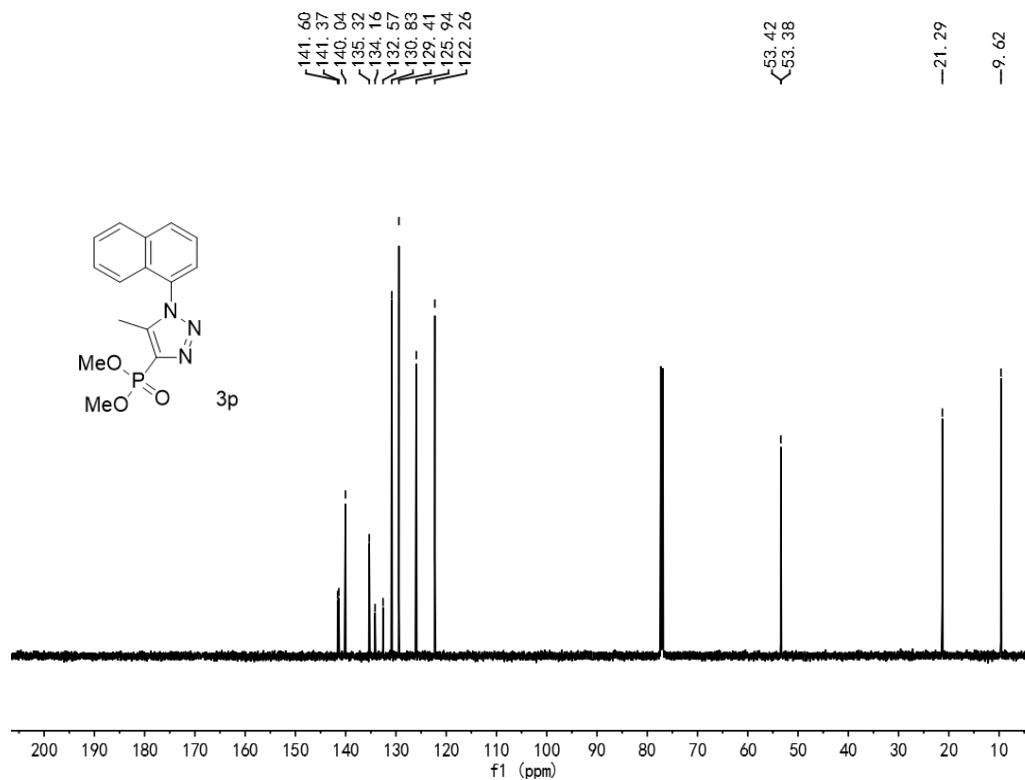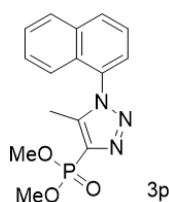

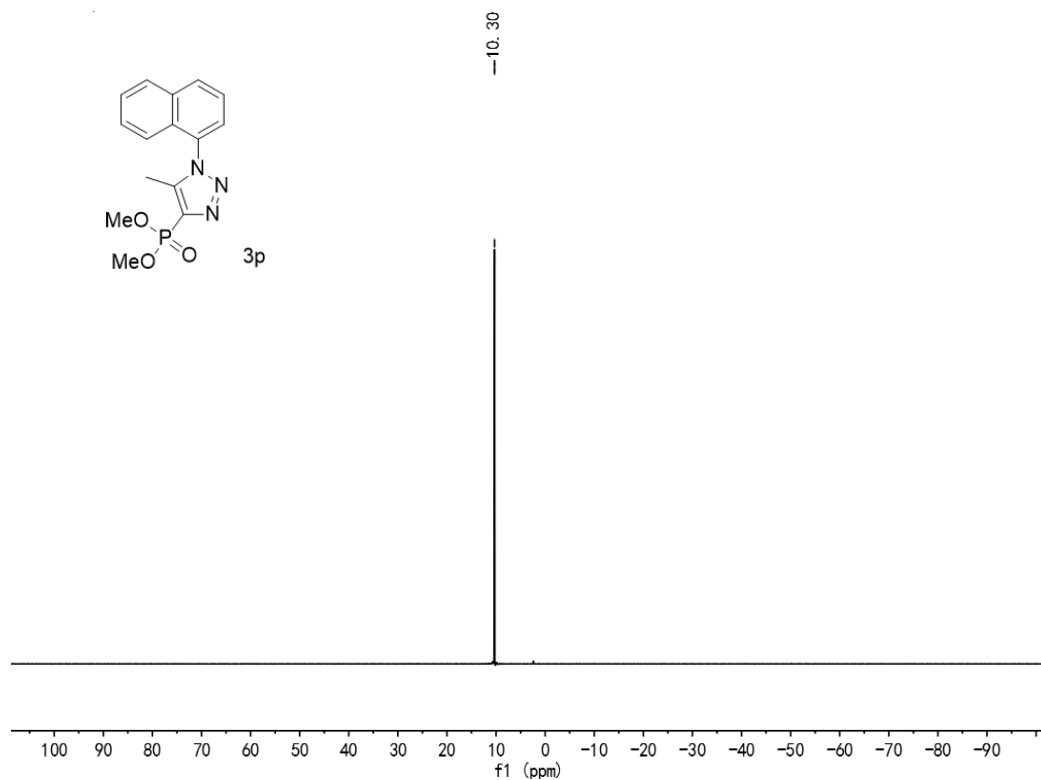

**Dimethyl (5-methyl-1-(p-tolyl)-1H-1,2,3-triazol-4-yl)phosphonate (3q)**

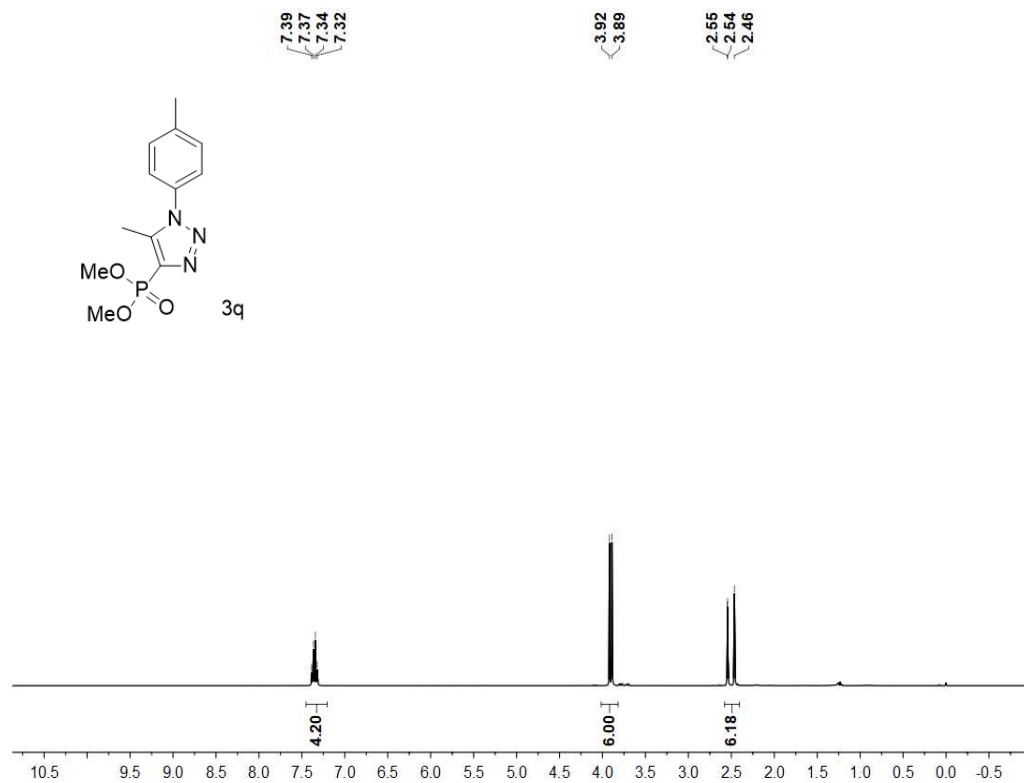

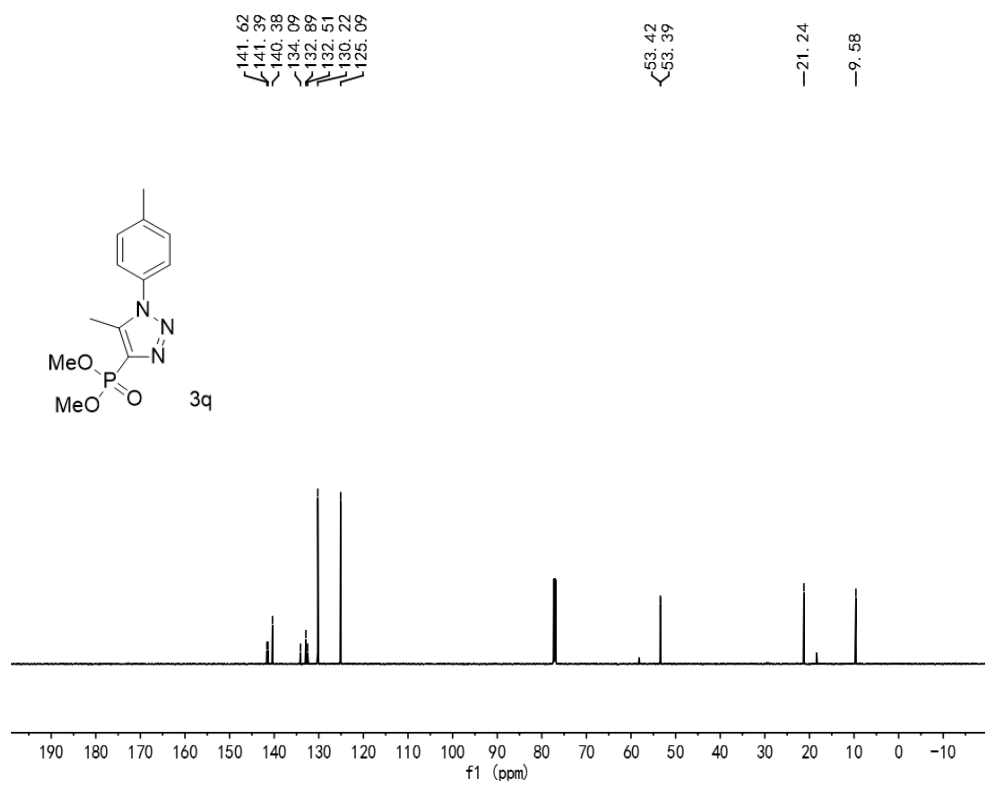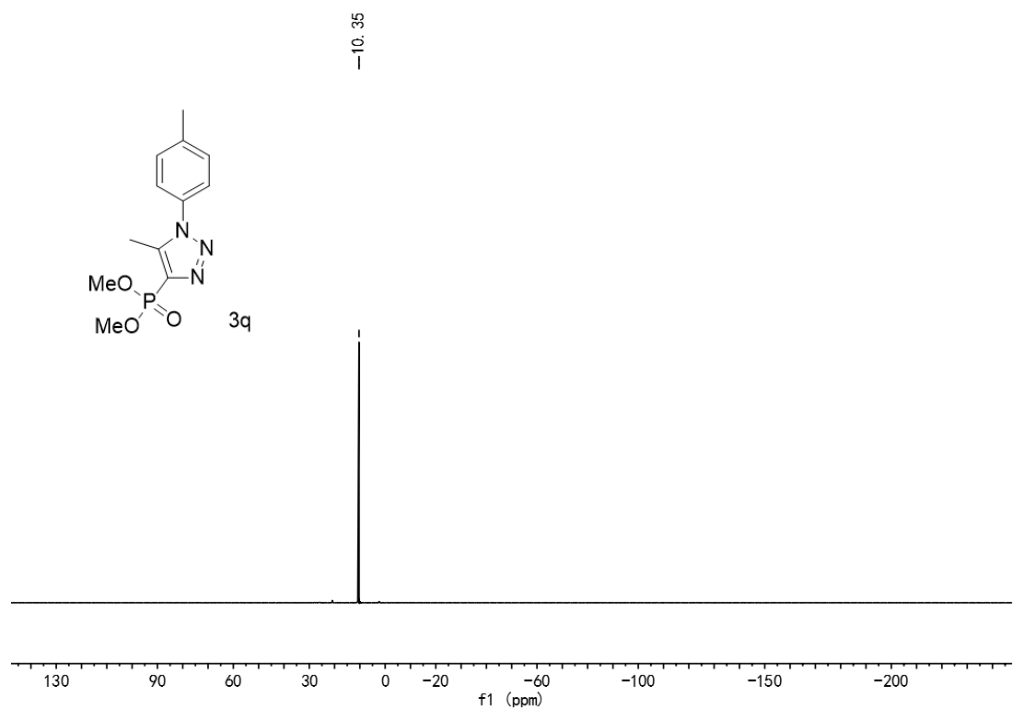

# Dimethyl(1-(4-methoxyphenyl)-5-methyl-1H-1,2,3-triazol-4-yl)phosphonate (3r)

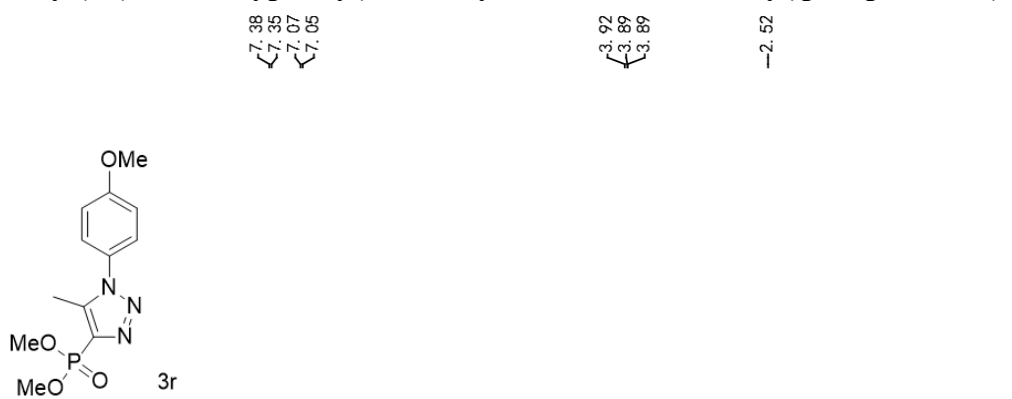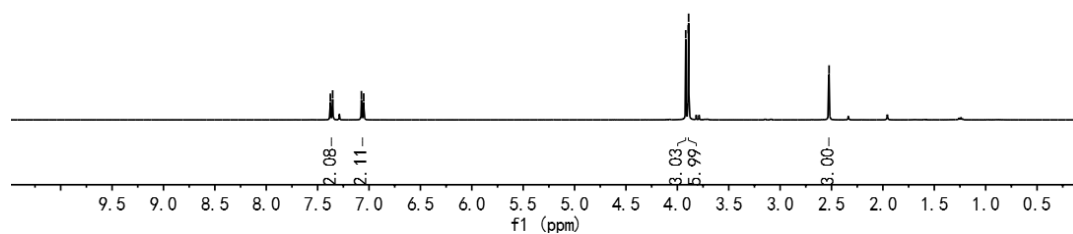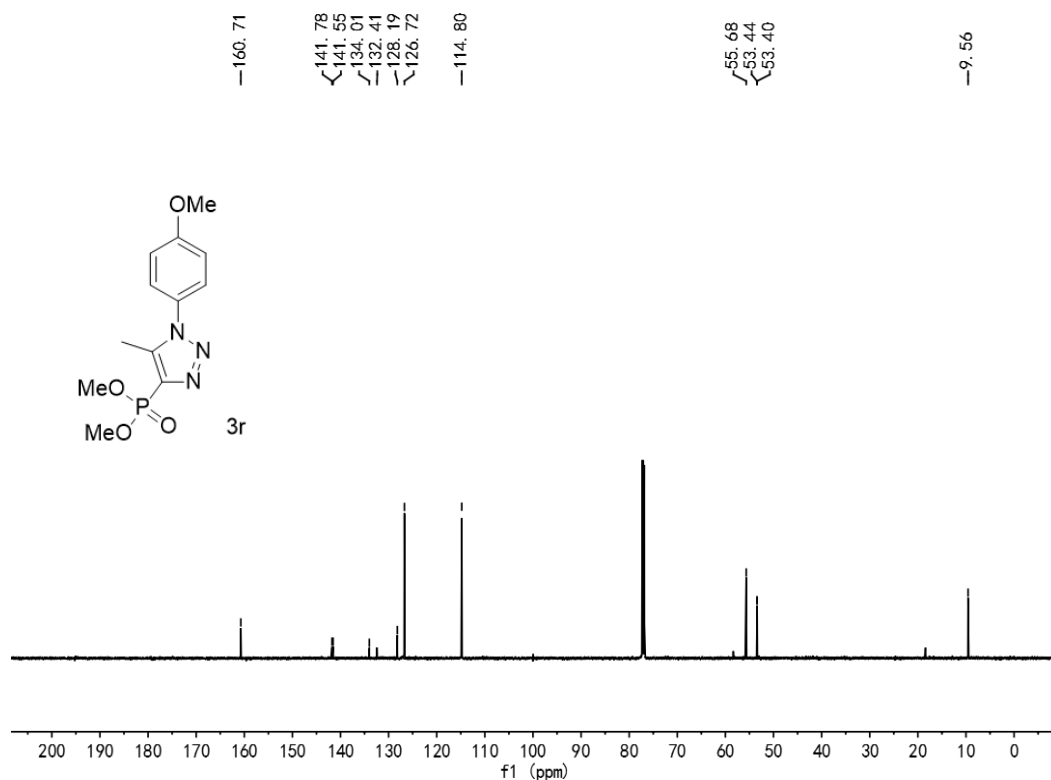

-10.37

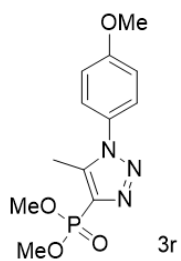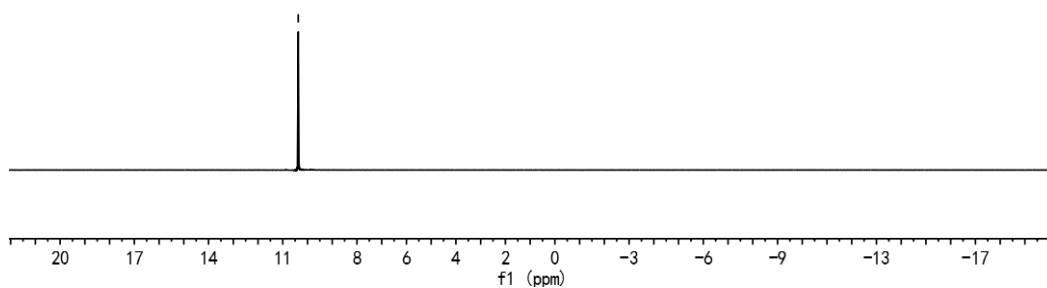

**Dimethyl(1-(3-methoxyphenyl)-5-methyl-1H-1,2,3-triazol-4-yl)phosphonate (3s)**

7.49, 7.47, 7.45, 7.10, 7.10, 7.08, 7.07, 7.02, 7.00, 6.99, 6.99, 3.92, 3.89, 3.87, 2.57, 2.56

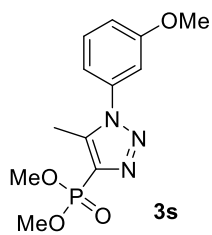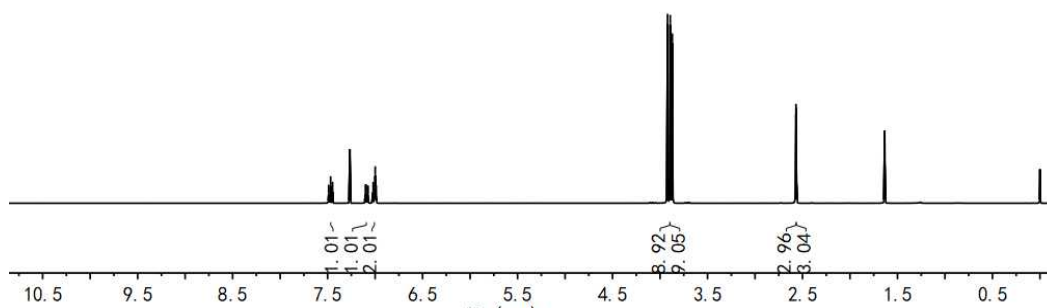

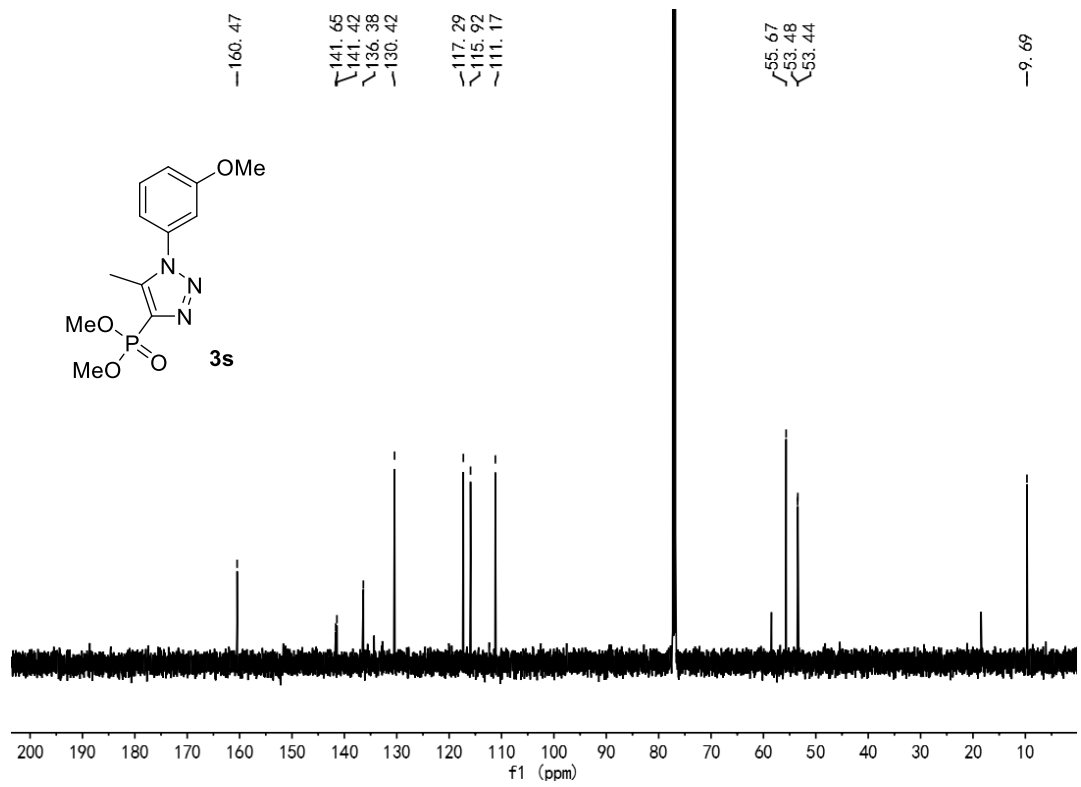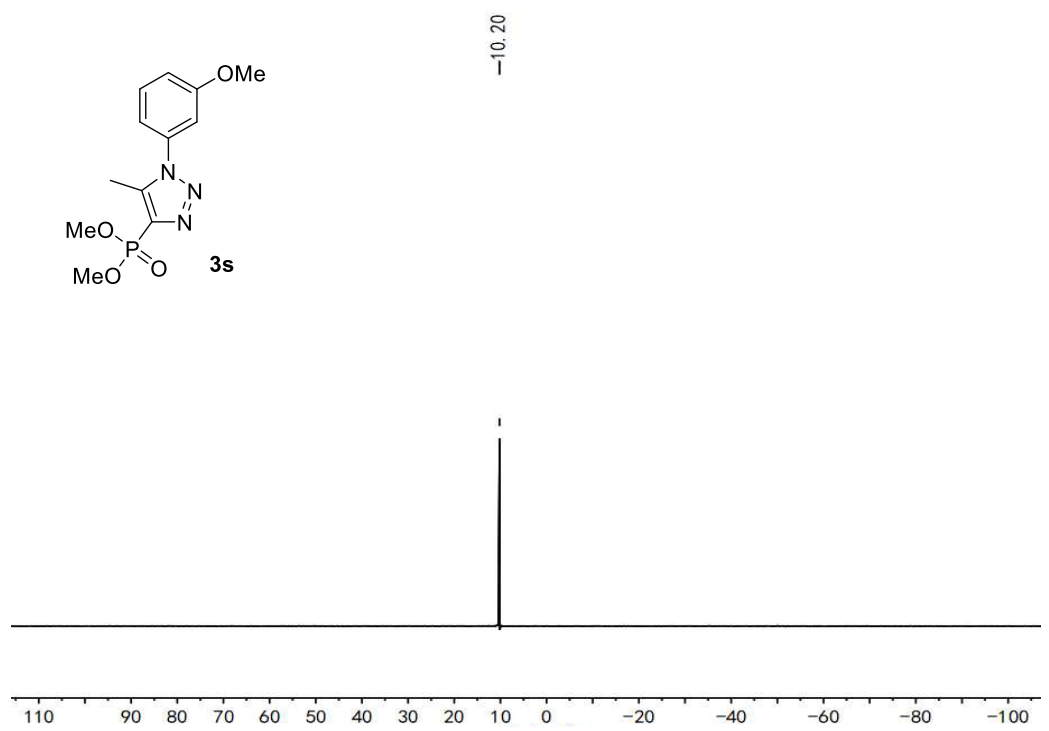

# Dimethyl(1-(2-methoxyphenyl)-5-methyl-1H-1,2,3-triazol-4-yl)phosphonate (3t)

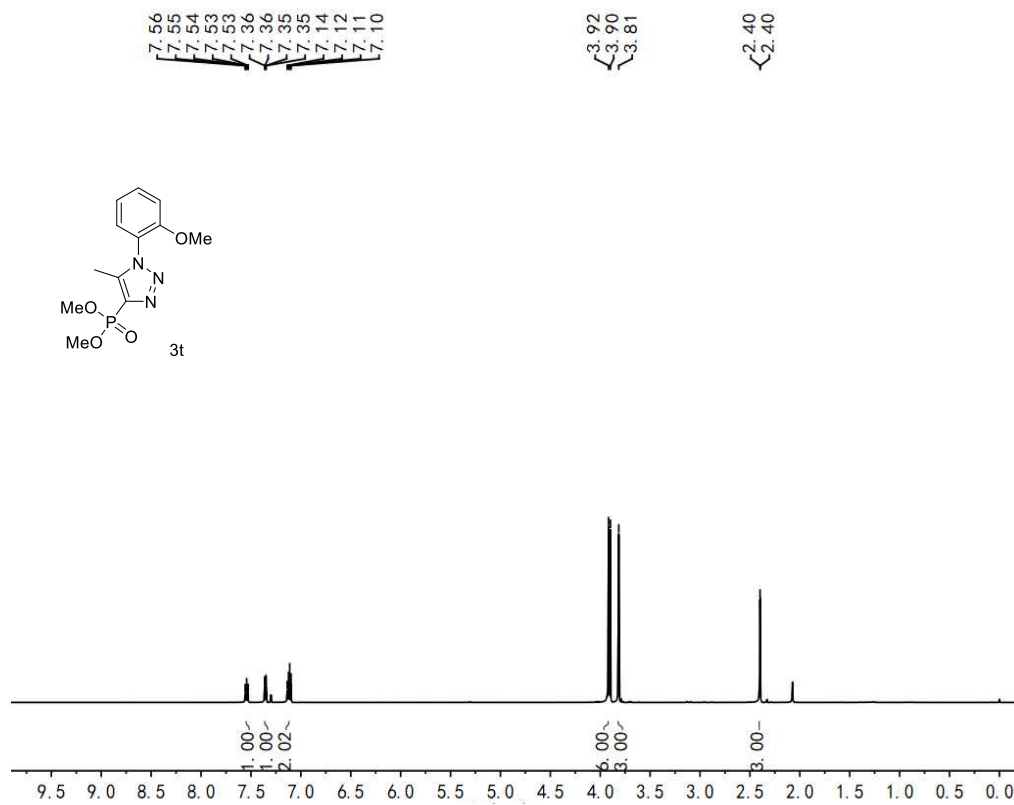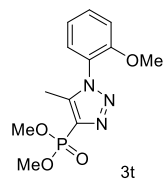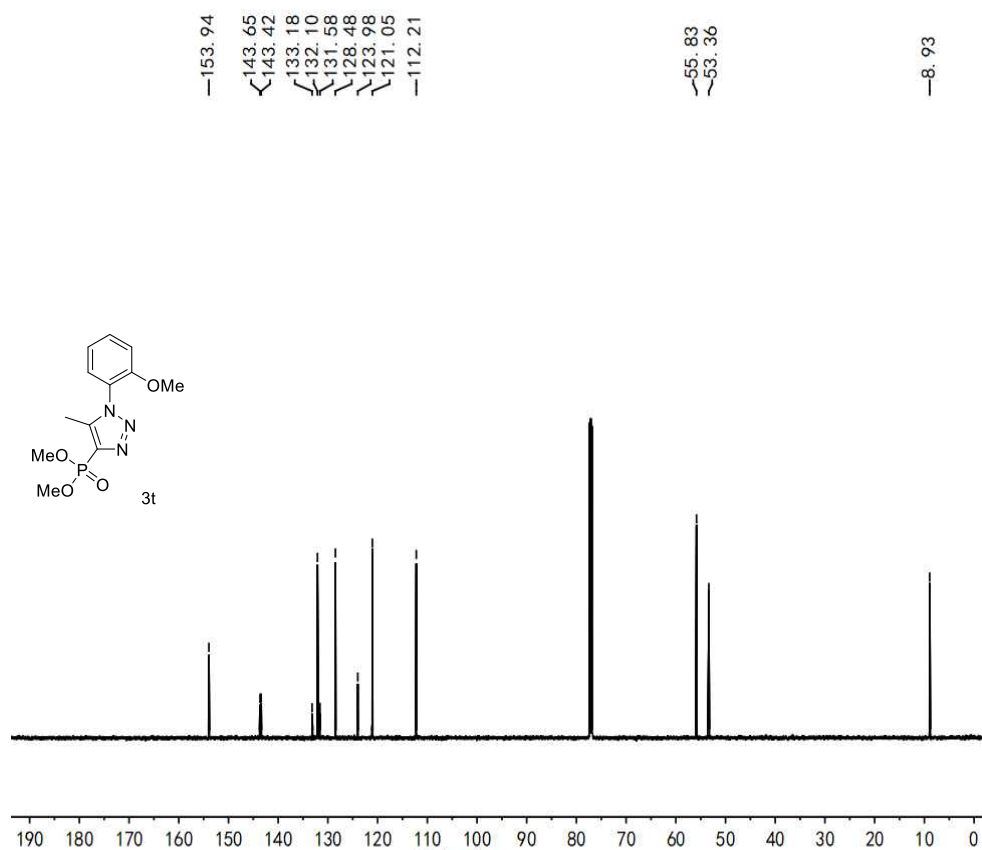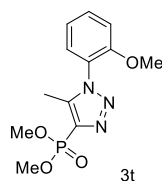



-10.76

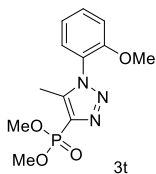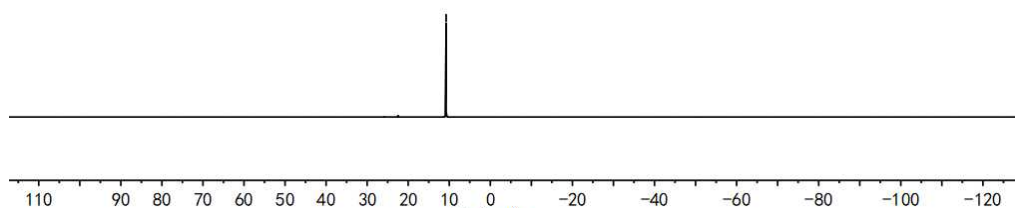

**Dimethyl(5-methyl-1-(m-tolyl)-1H-1,2,3-triazol-4-yl)phosphonate (3u)**

7.47 7.45 7.44 7.37 7.36 7.28 7.24 7.23 3.91 3.89 2.55 2.46

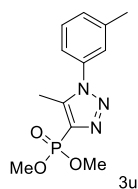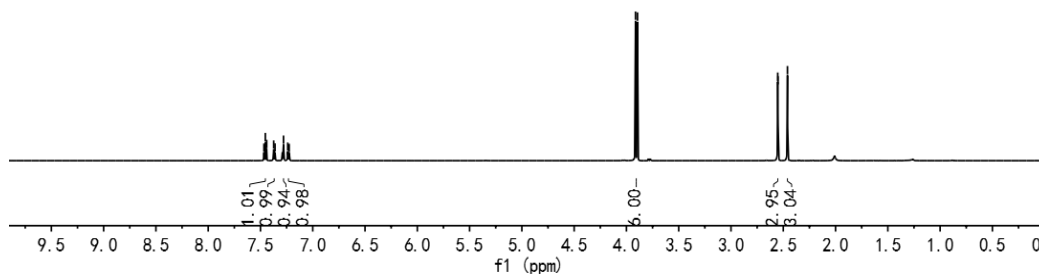

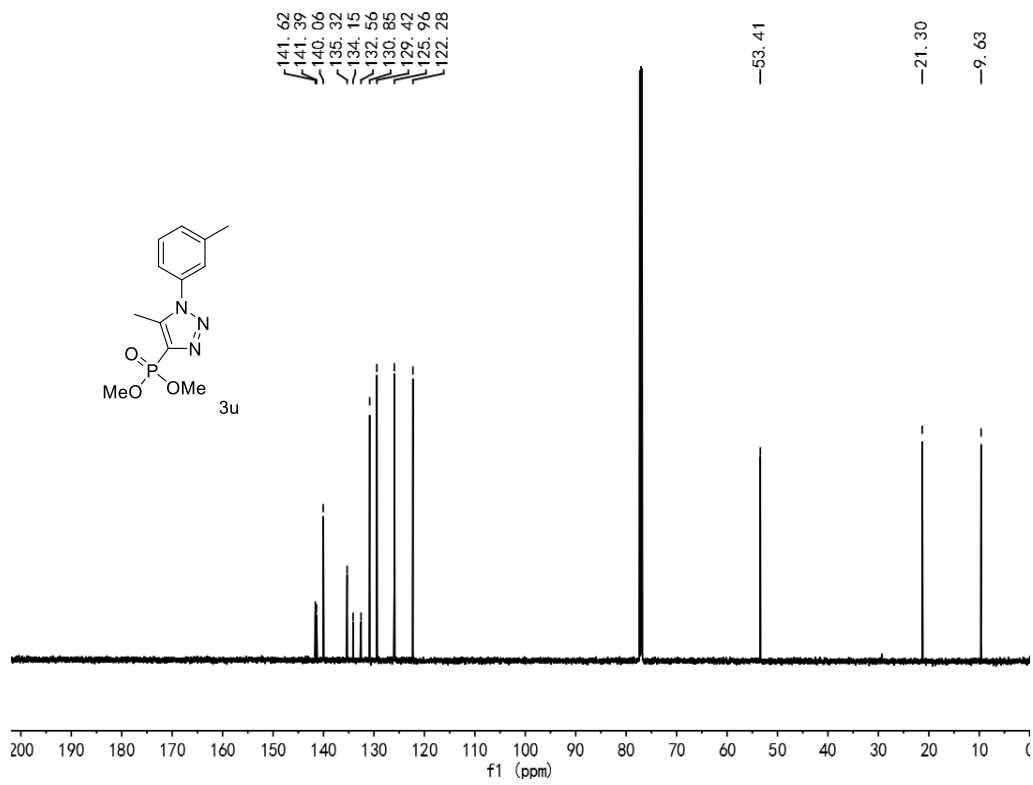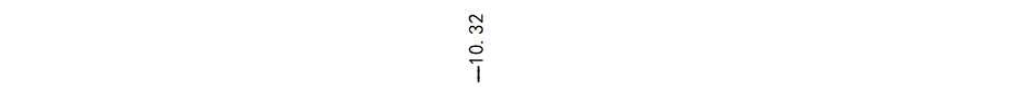

**Dimethyl(1-(2-methoxyphenyl)-5-methyl-1H-1,2,3-triazol-4-yl)phosphonate (3v)**

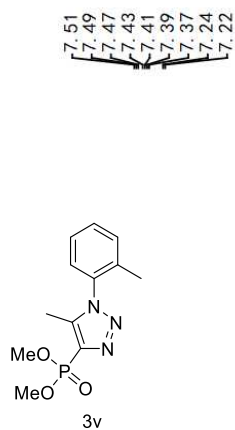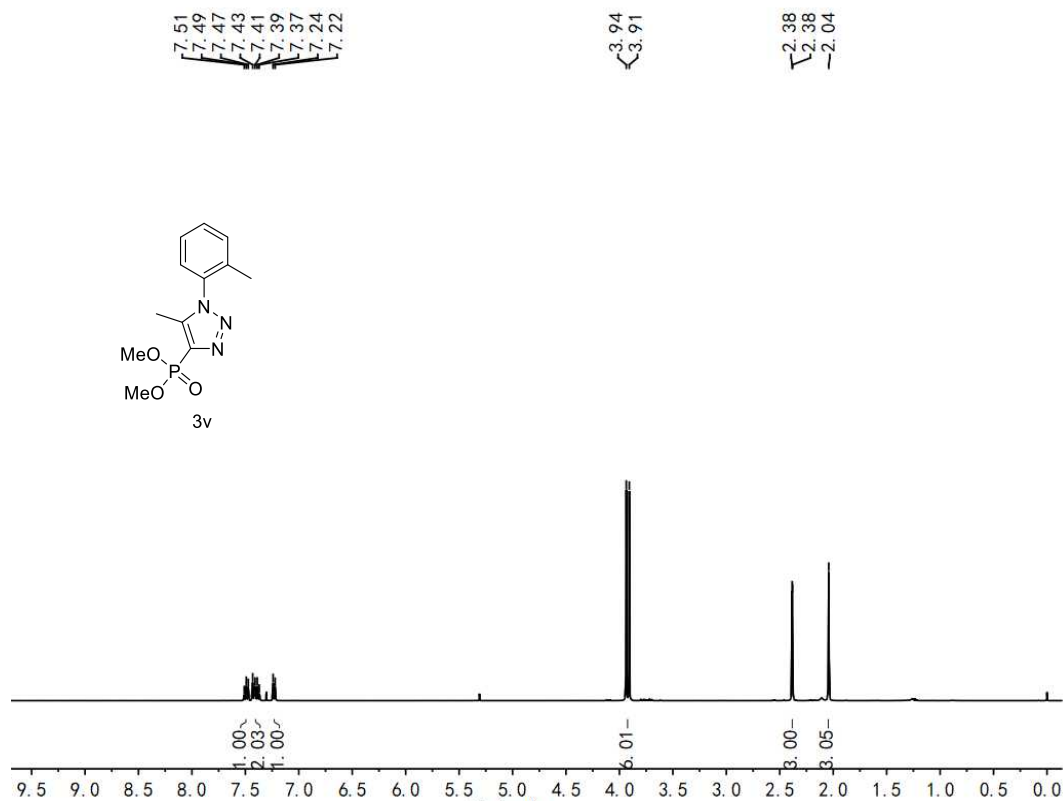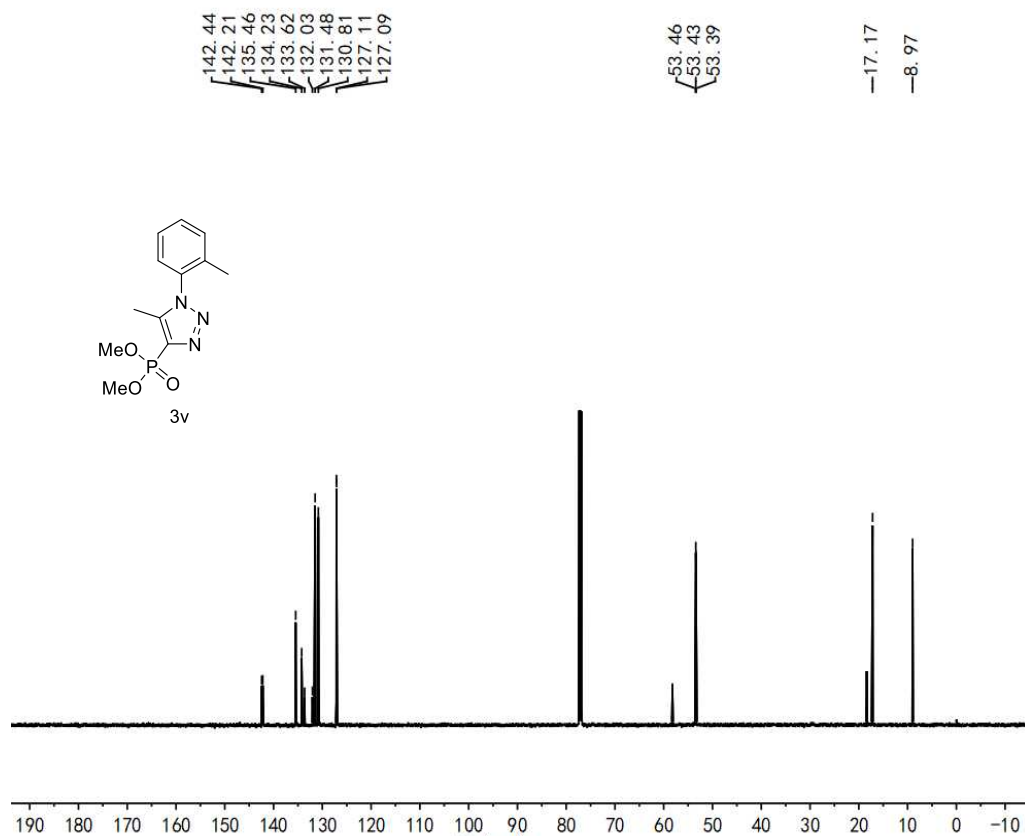

-10.32

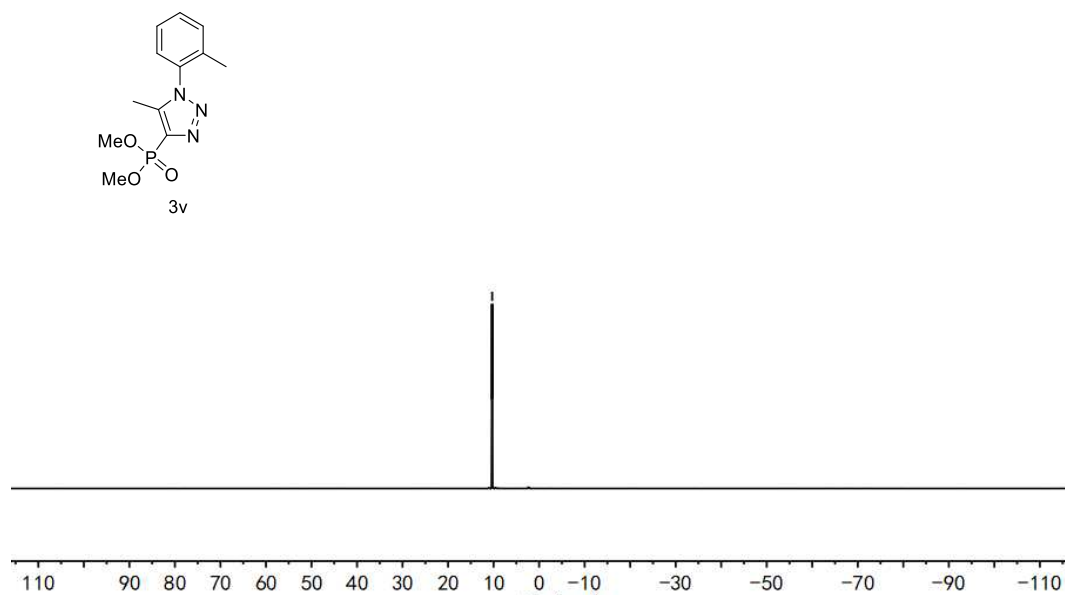

**Dimethyl(1-(3-chloro-4-methylphenyl)-5-methyl-1H-1,2,3-triazol-4-yl)phosphonate (3w)**

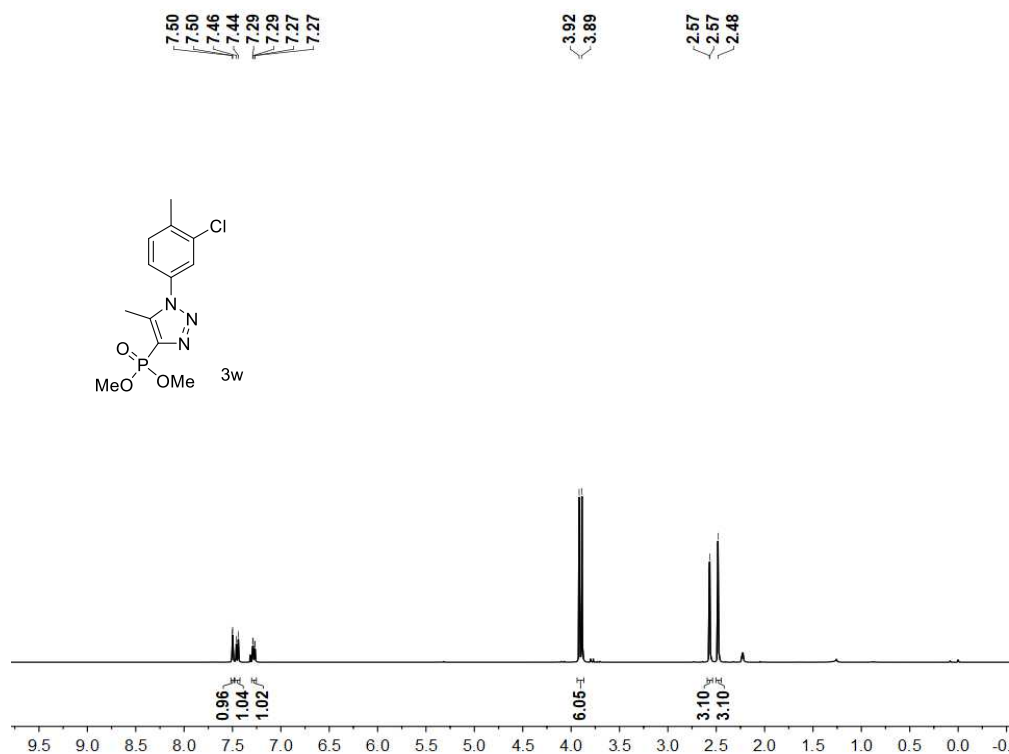

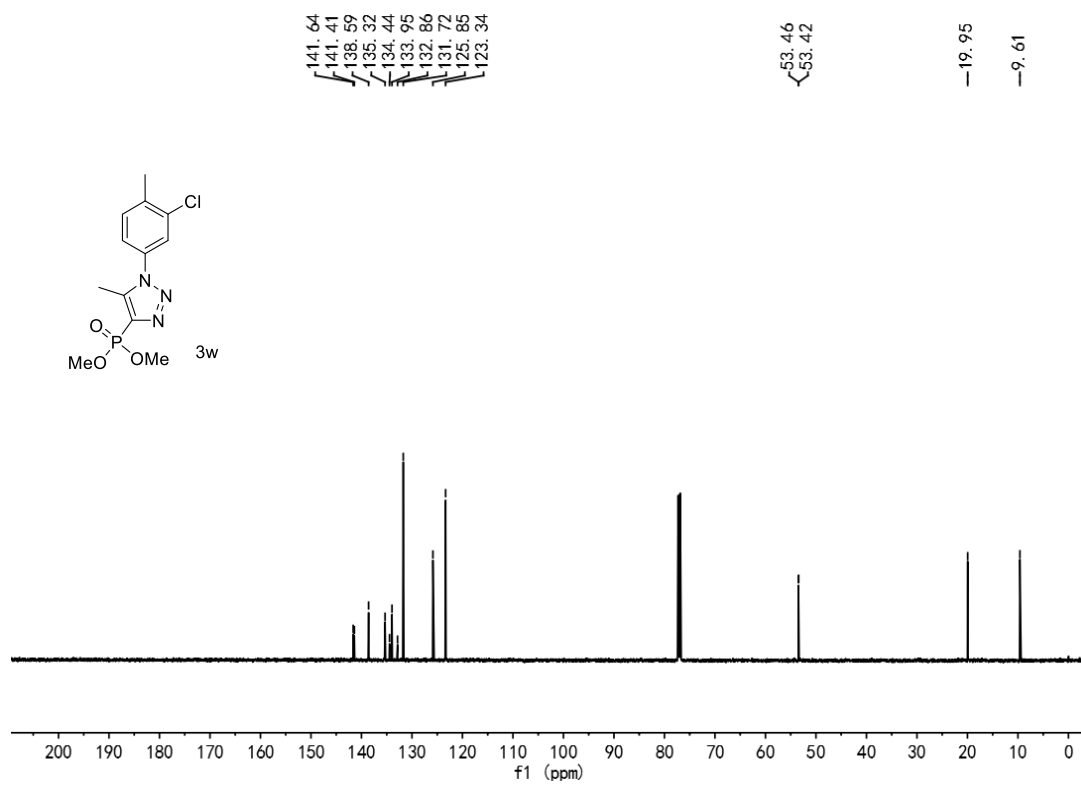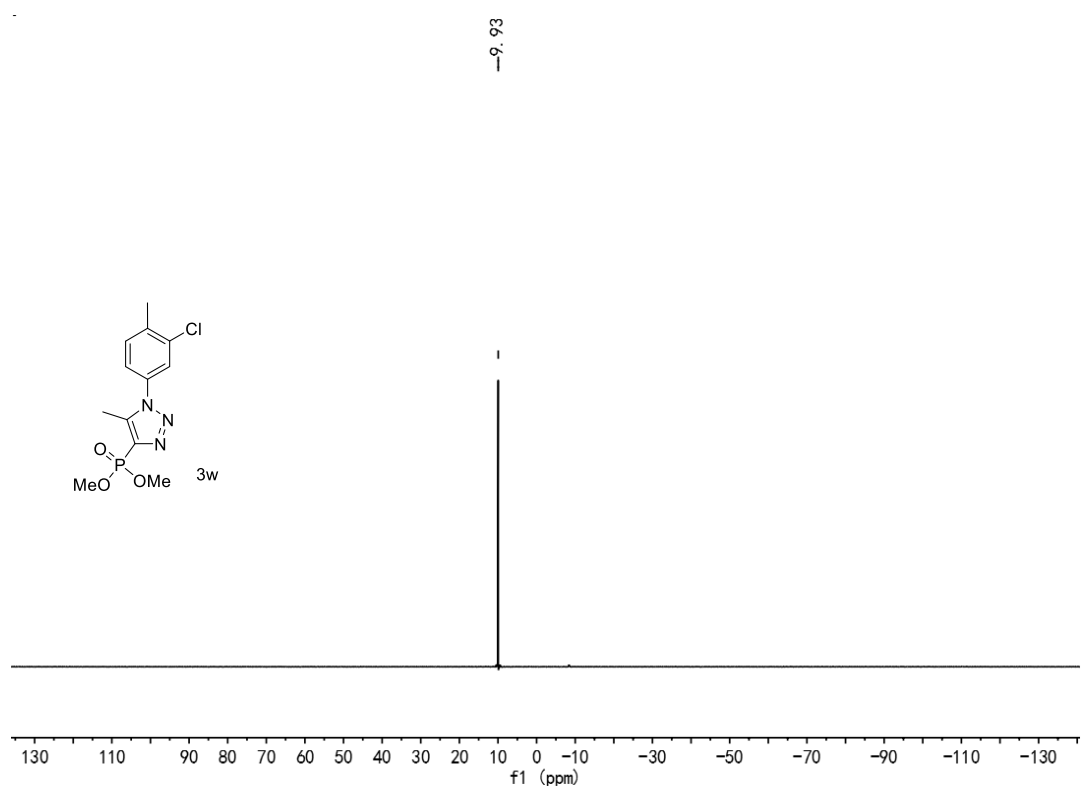

# Dimethyl(1-(2,4-dimethylphenyl)-5-methyl-1H-1,2,3-triazol-4-yl)phosphonate (3x)

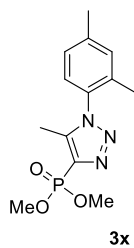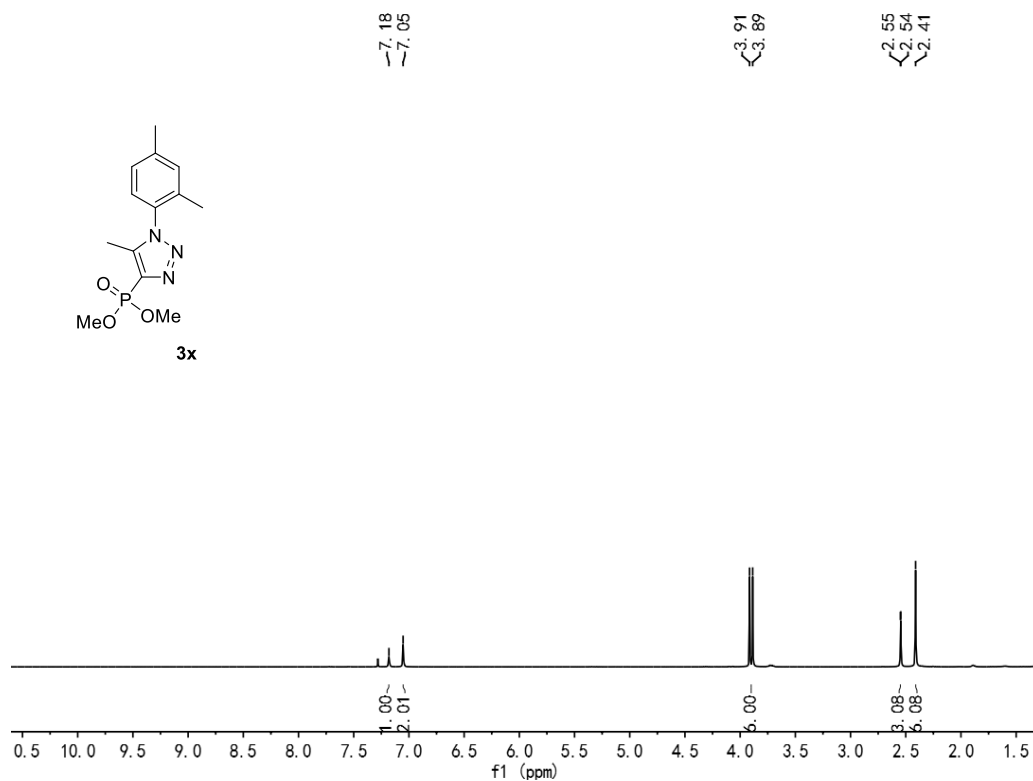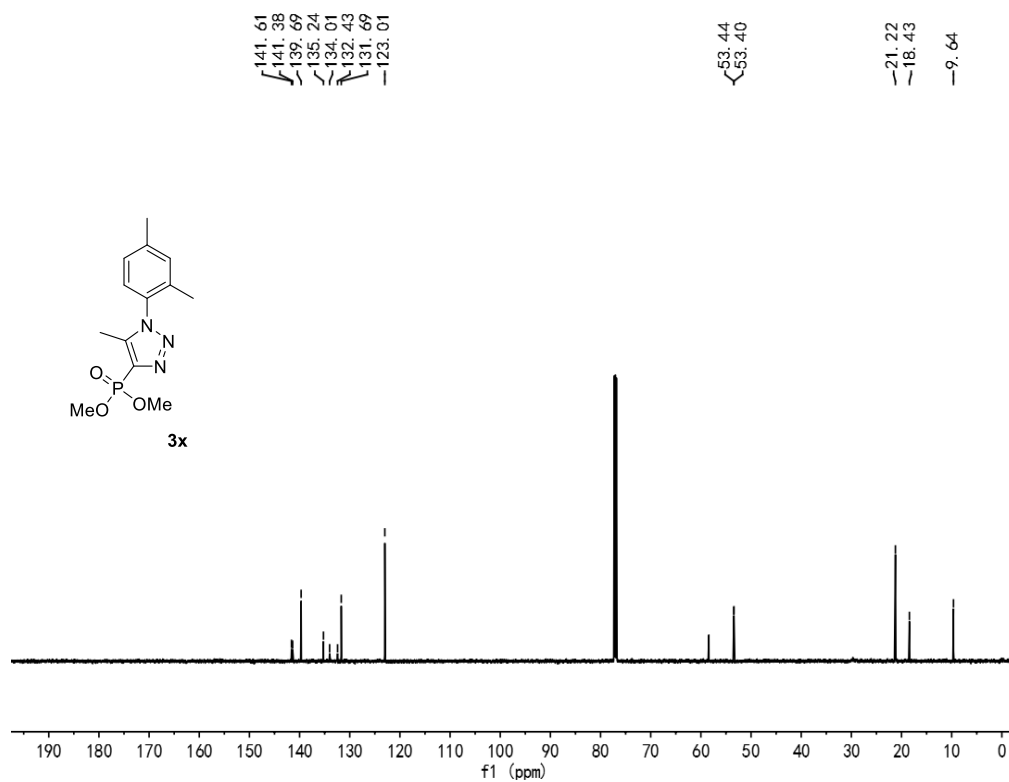

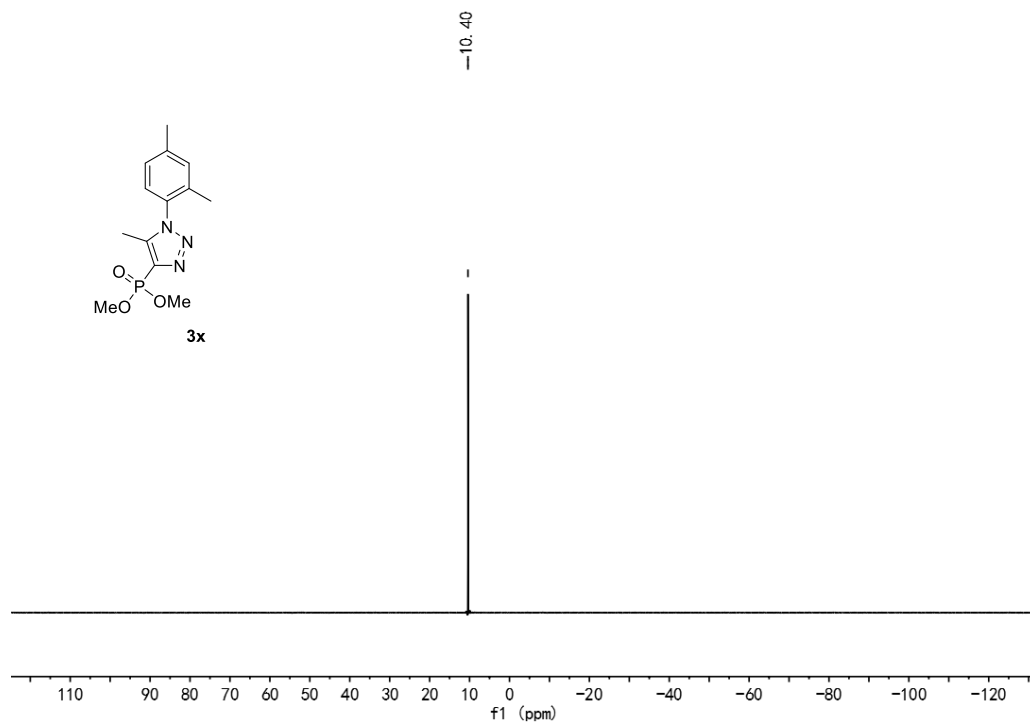

**Dimethyl(1-(3,5-dimethylphenyl)-5-methyl-1H-1,2,3-triazol-4-yl)phosphonate (3y)**

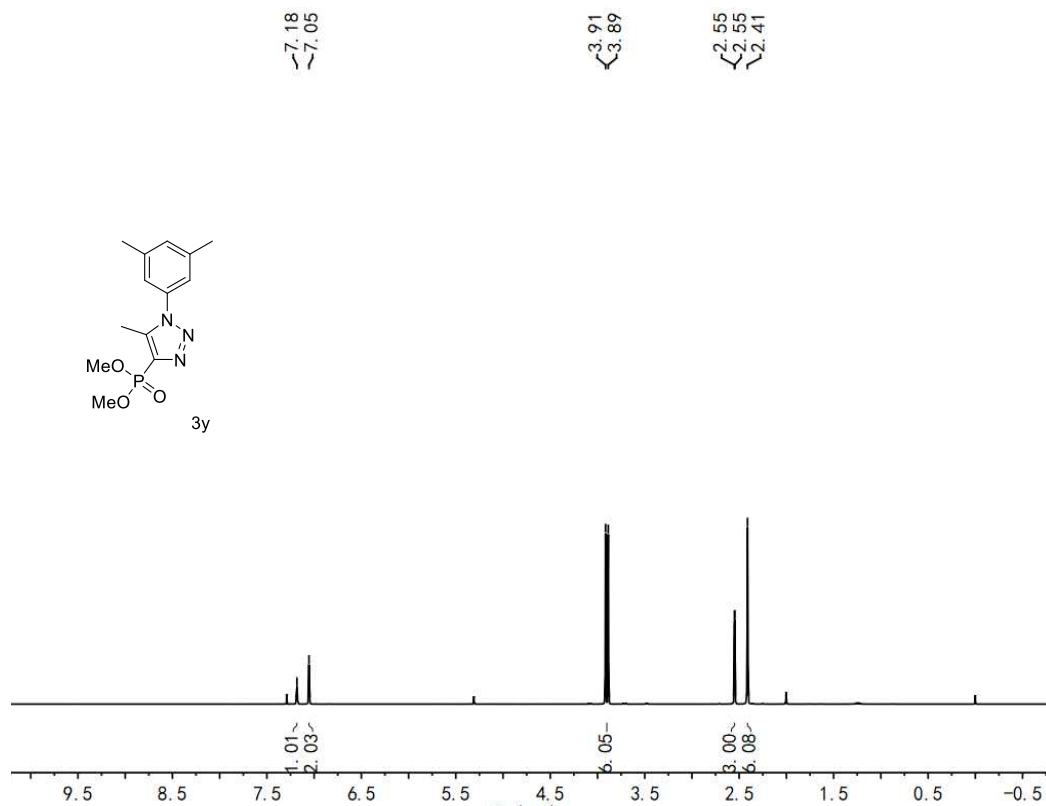

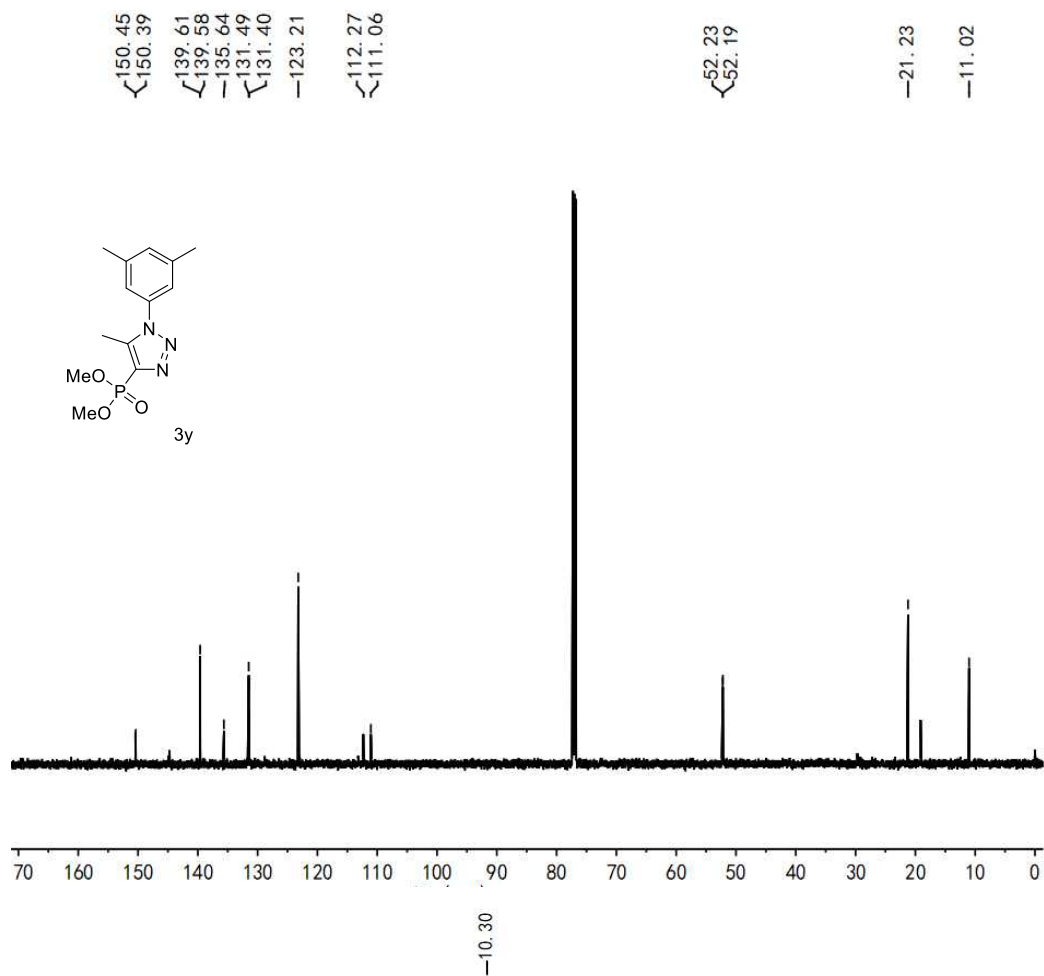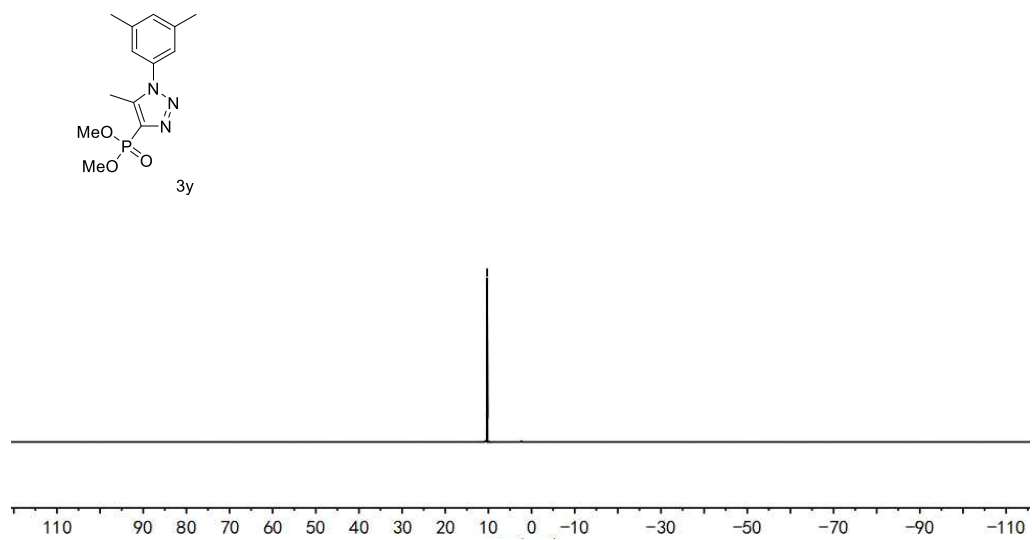



# Dimethyl(1-(2,3-difluorophenyl)-5-methyl-1H-1,2,3-triazol-4-yl)phosphonate (3z)

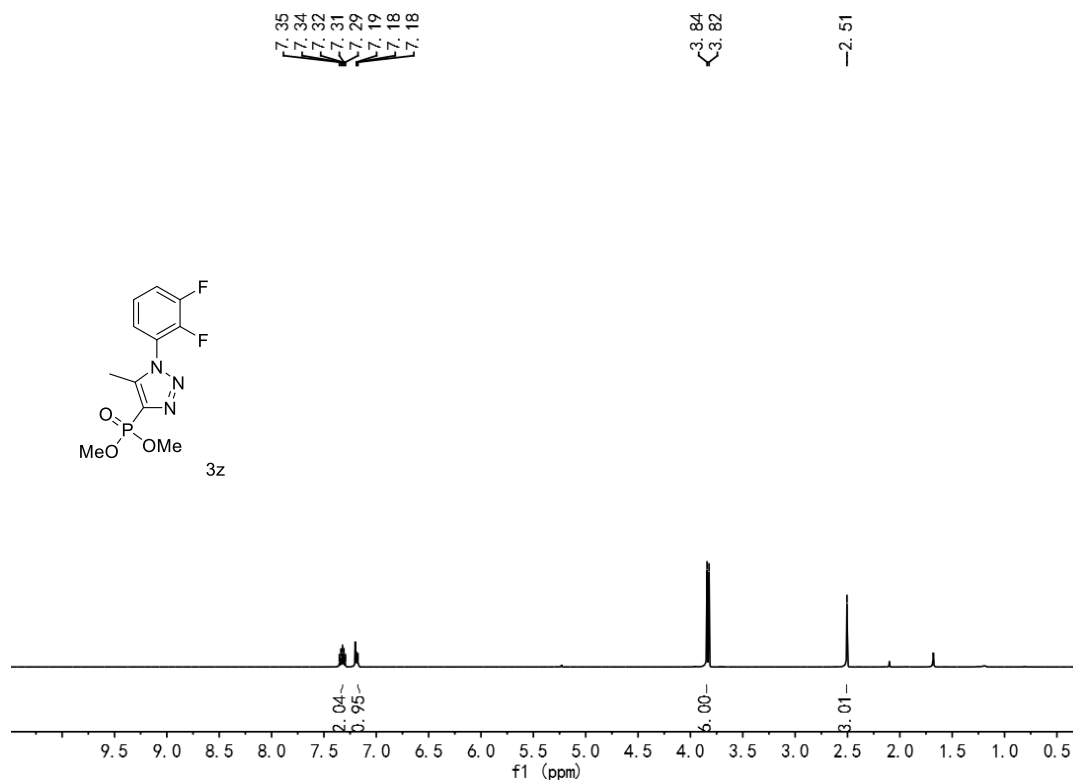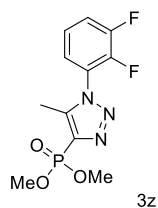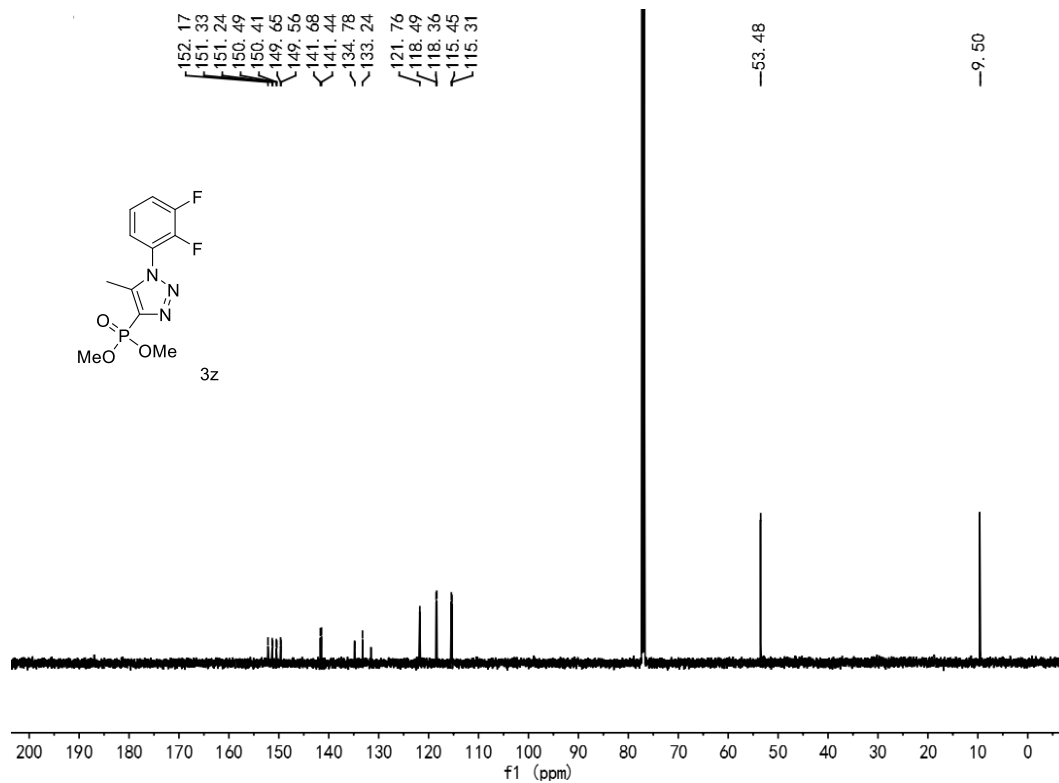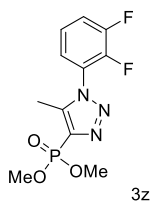

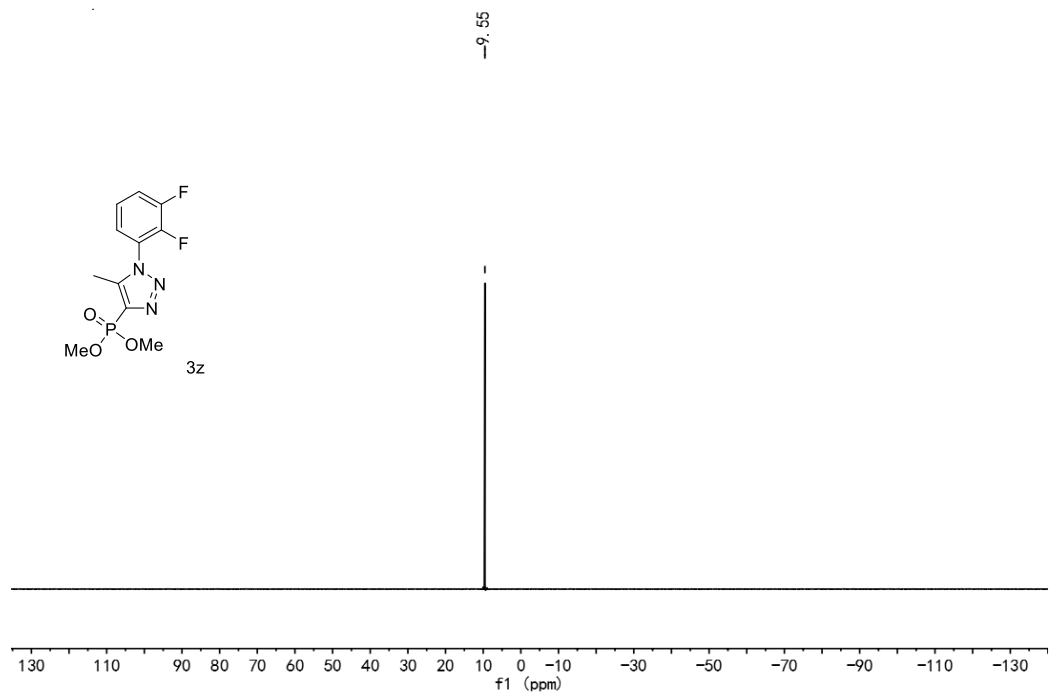

**Dimethyl(1-(3,5-difluorophenyl)-5-methyl-1H-1,2,3-triazol-4-yl)phosphonate (3aa)**

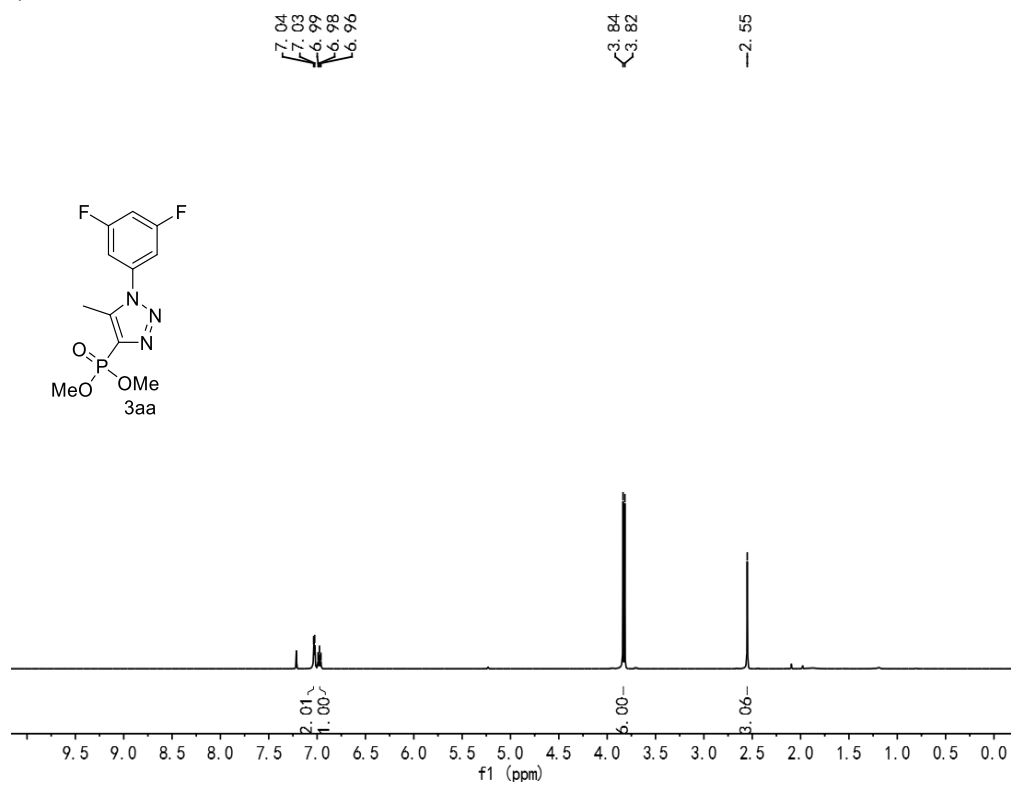

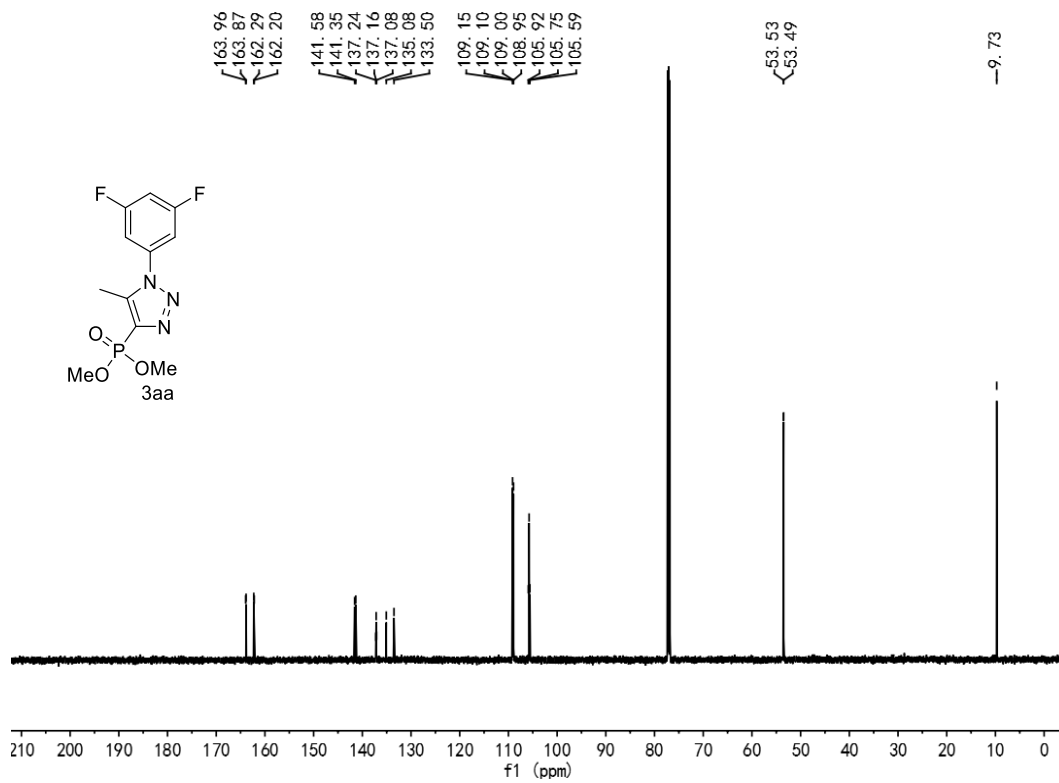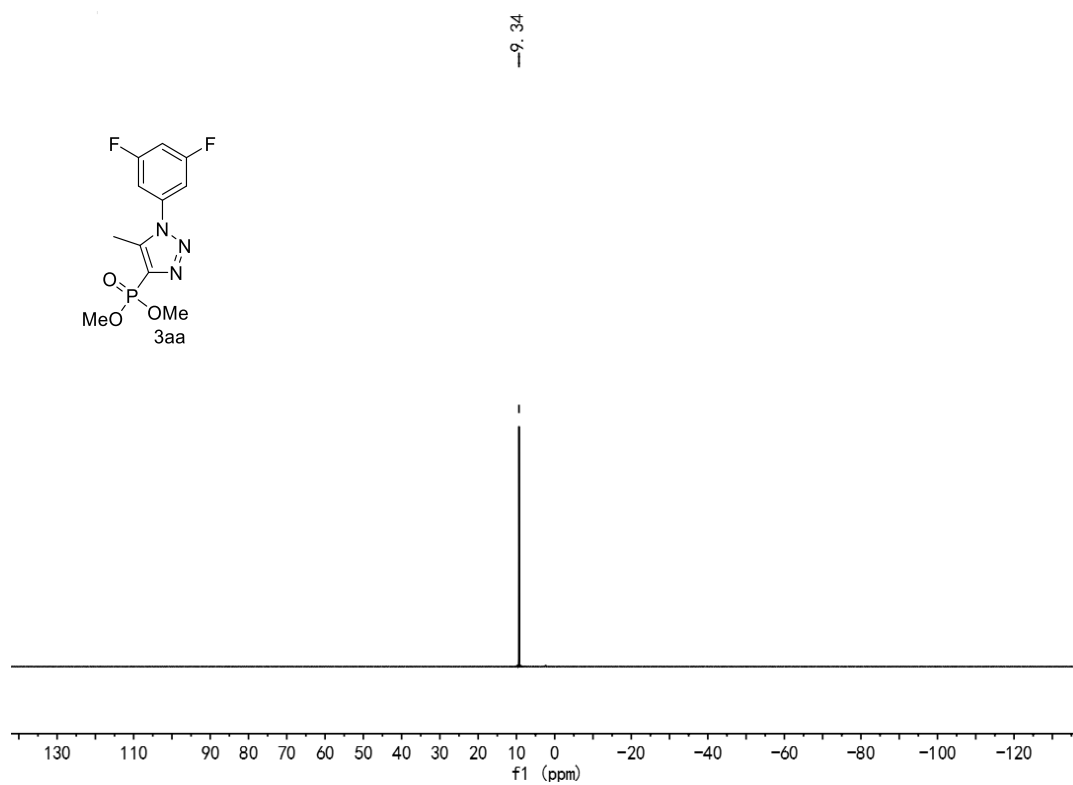

**Dimethyl(5-methyl-1-(3,4,5-trifluorophenyl)-1H-1,2,3-triazol-4-yl)phosphonate (3ab)**

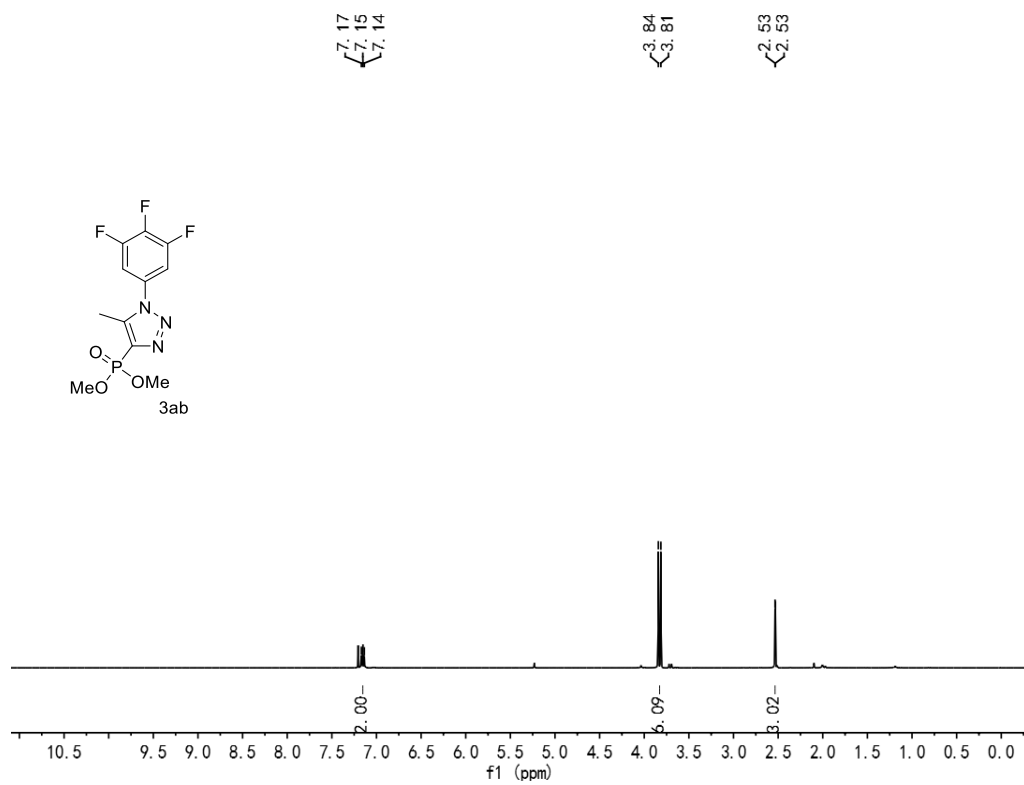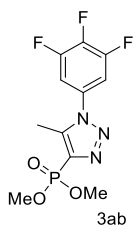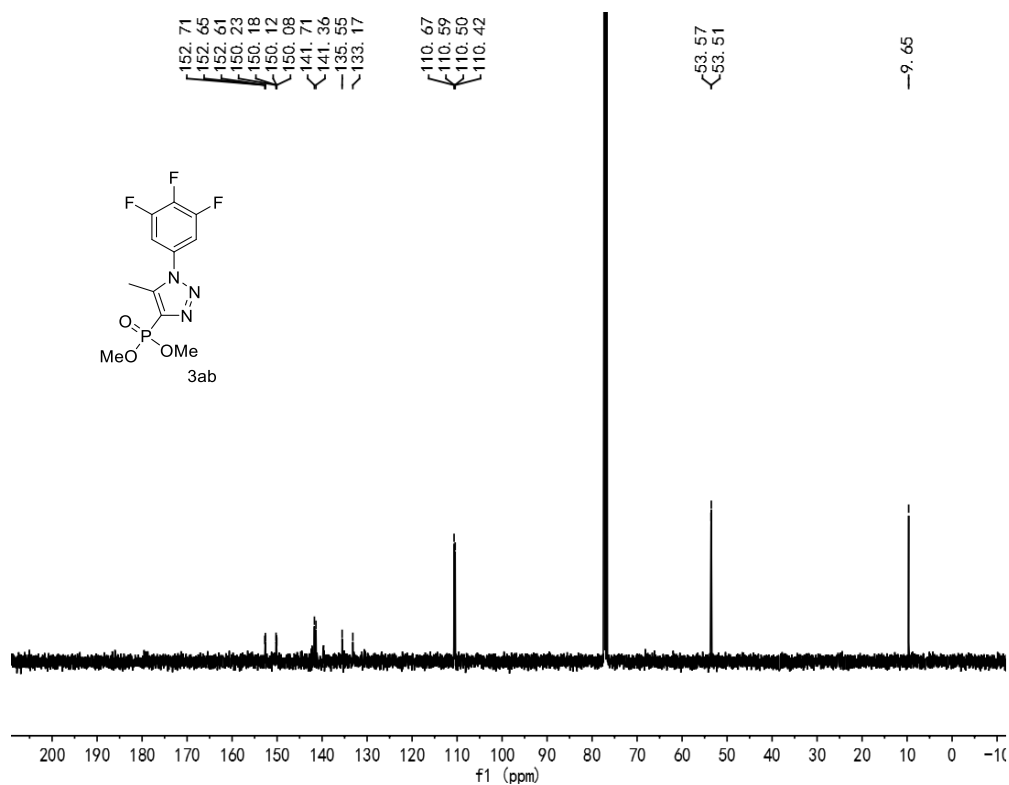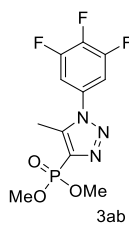

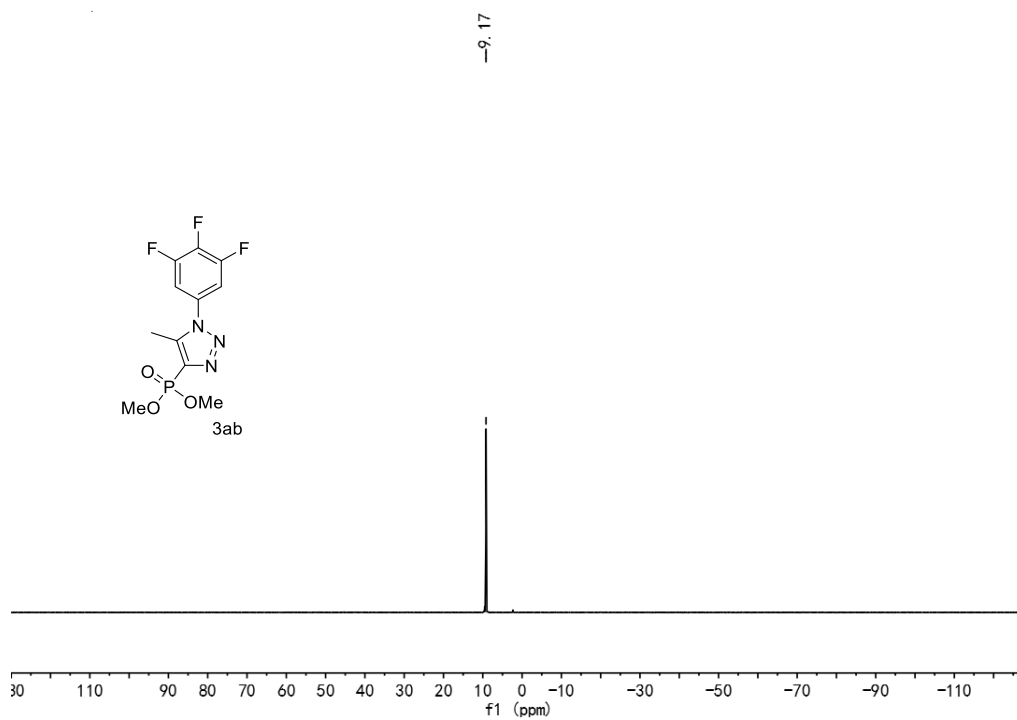

**Diethyl(5-(4-fluorophenyl)-1-(3-(trifluoromethyl)phenyl)-1H-1,2,3-triazol-4-yl)phosphonate (3ac)**

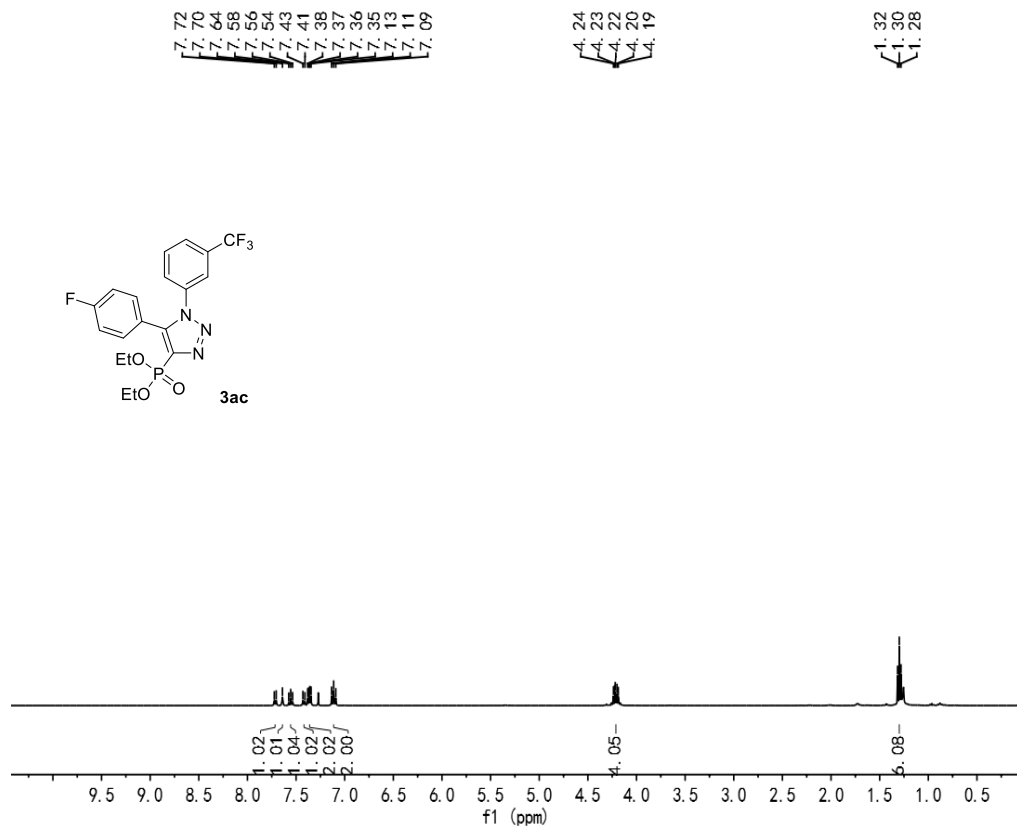

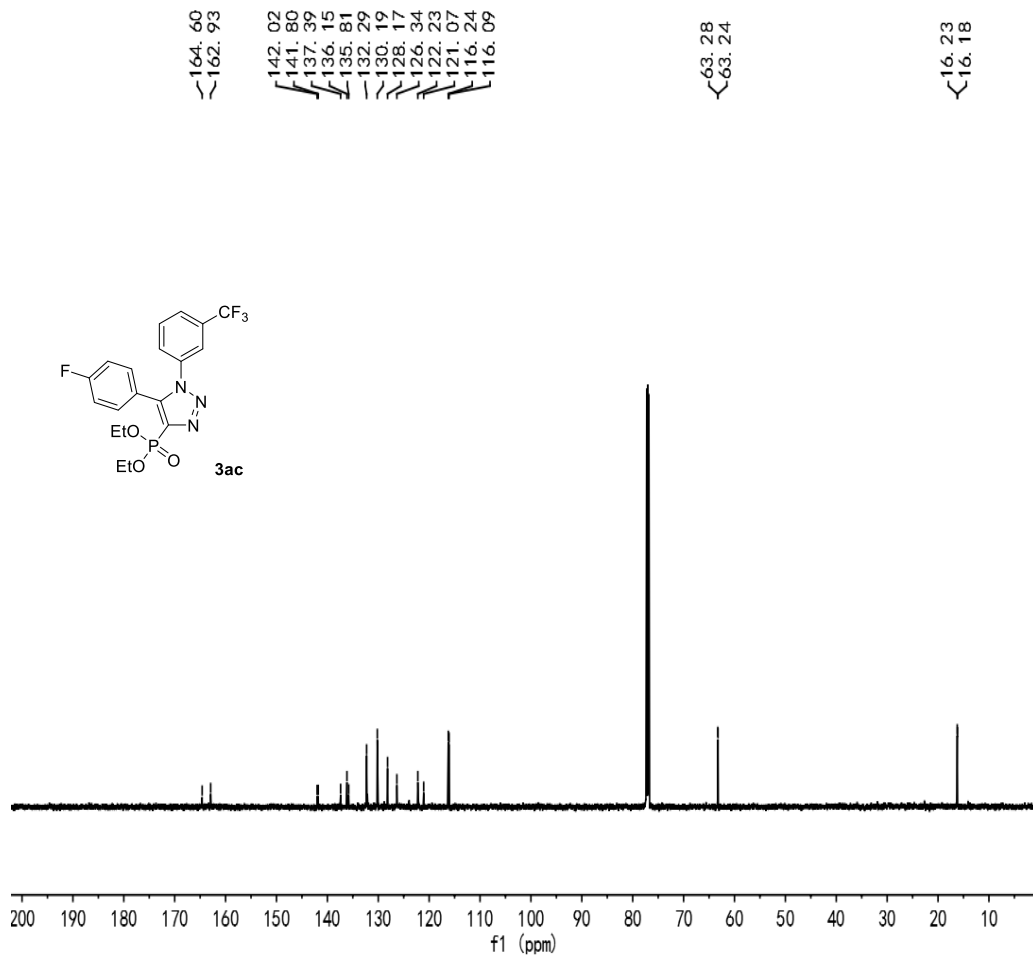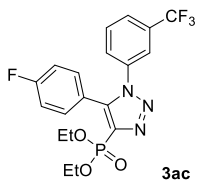

-6.20

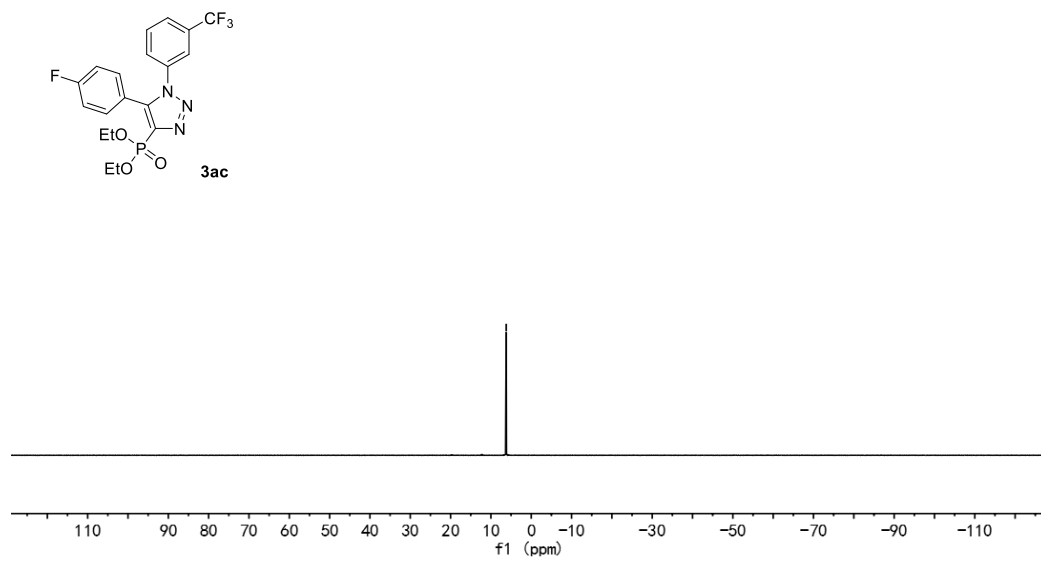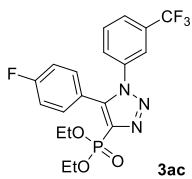

**Diethyl(5-(4-bromophenyl)-1-(3-(trifluoromethyl)phenyl)-1H-1,2,3-triazol-4-yl)phosphonate (3ad)**

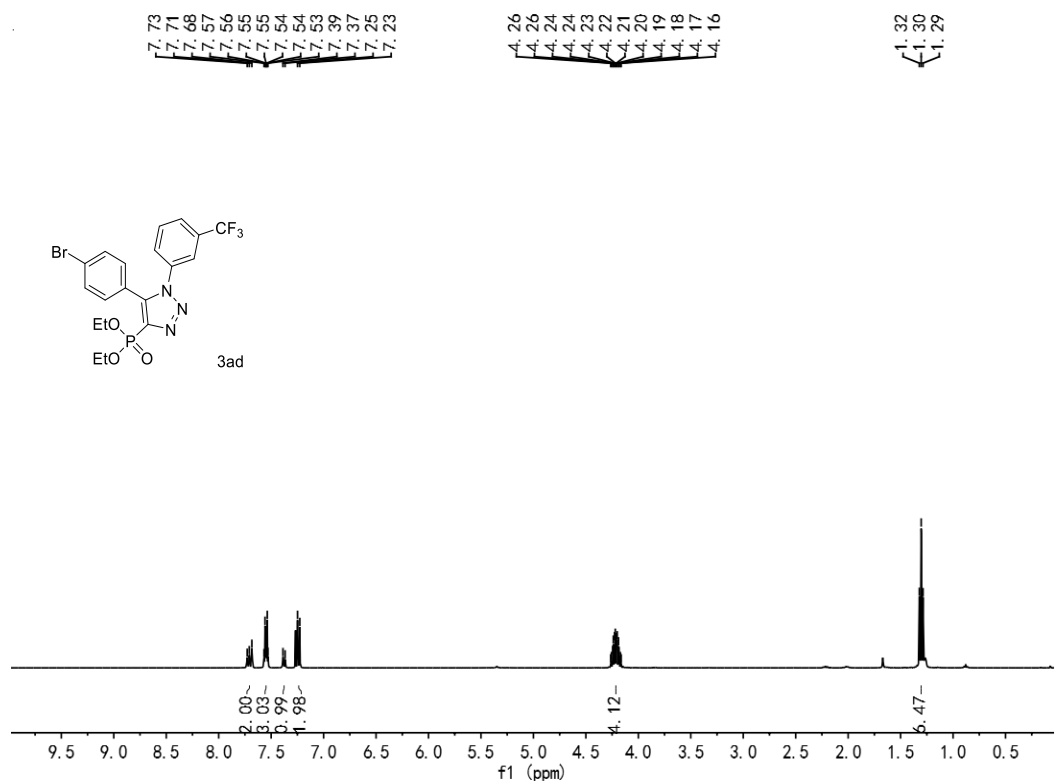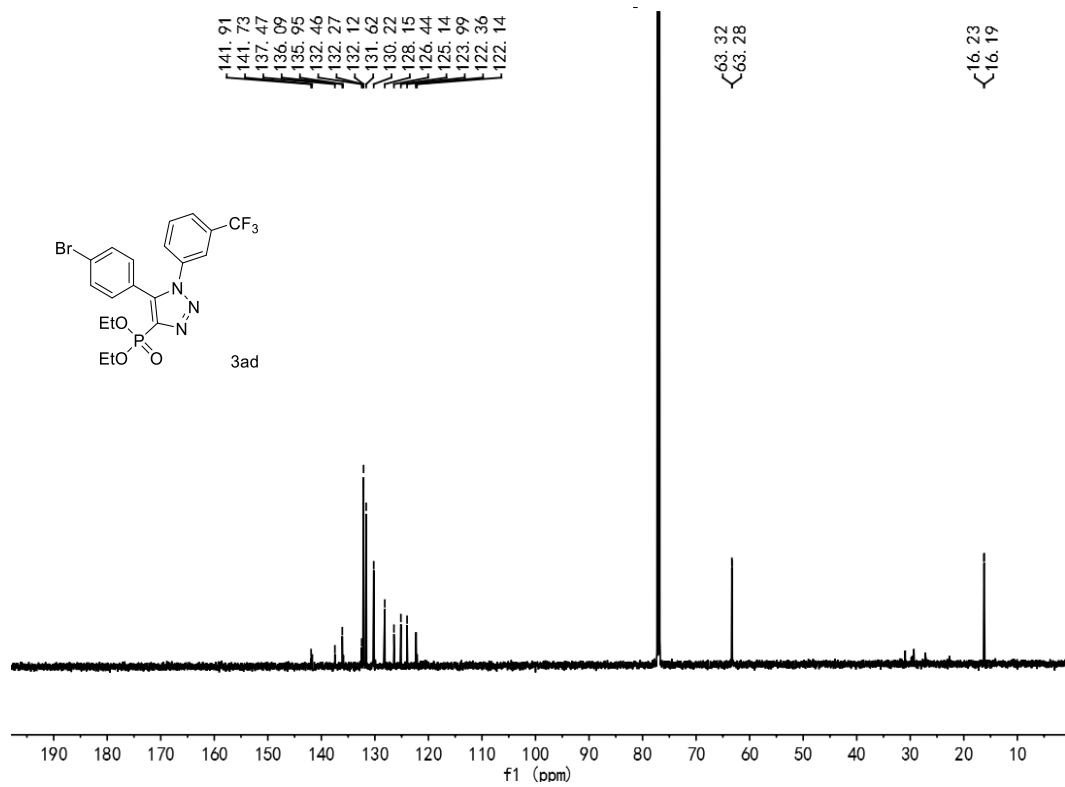

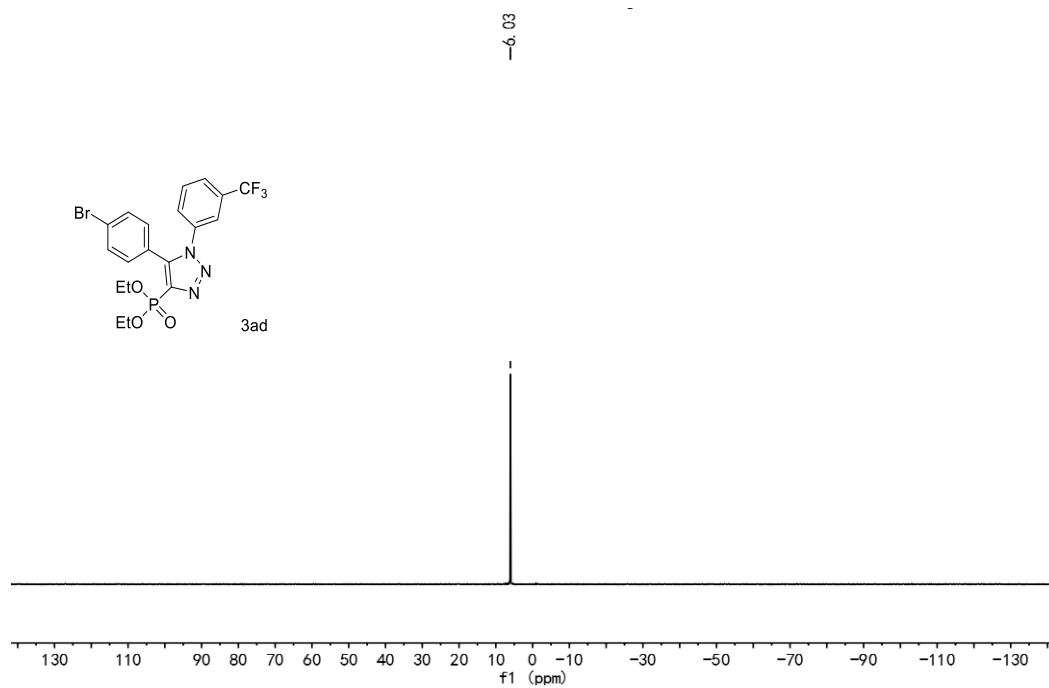

**Diethyl(5-(p-tolyl)-1-(3-(trifluoromethyl)phenyl)-1H-1,2,3-triazol-4-yl)phosphonate (3ae)**

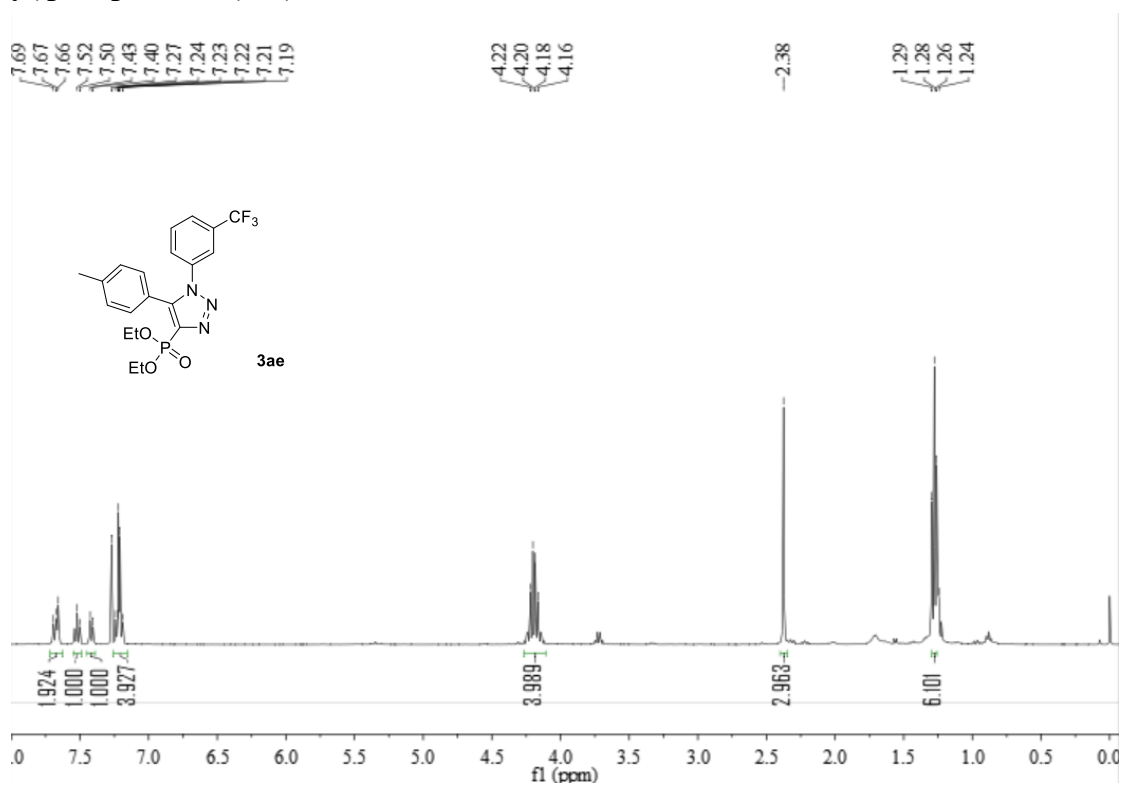



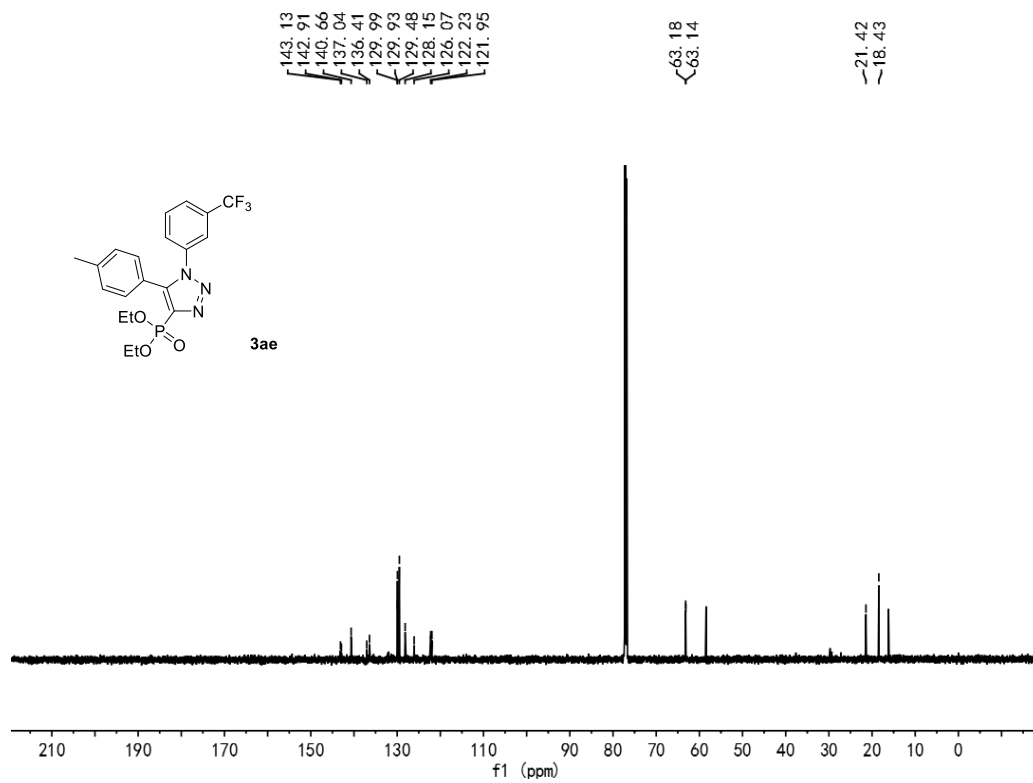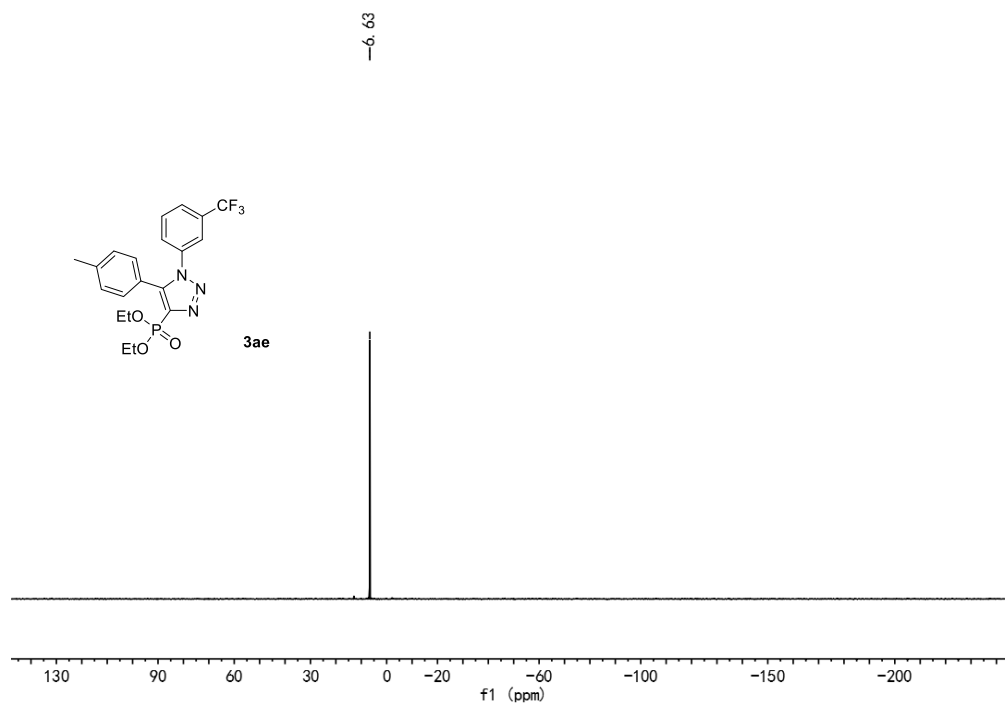

**Diethyl(5-phenyl-1-(3-(trifluoromethyl)phenyl)-1H-1,2,3-triazol-4-yl)phosphonate (3af)**

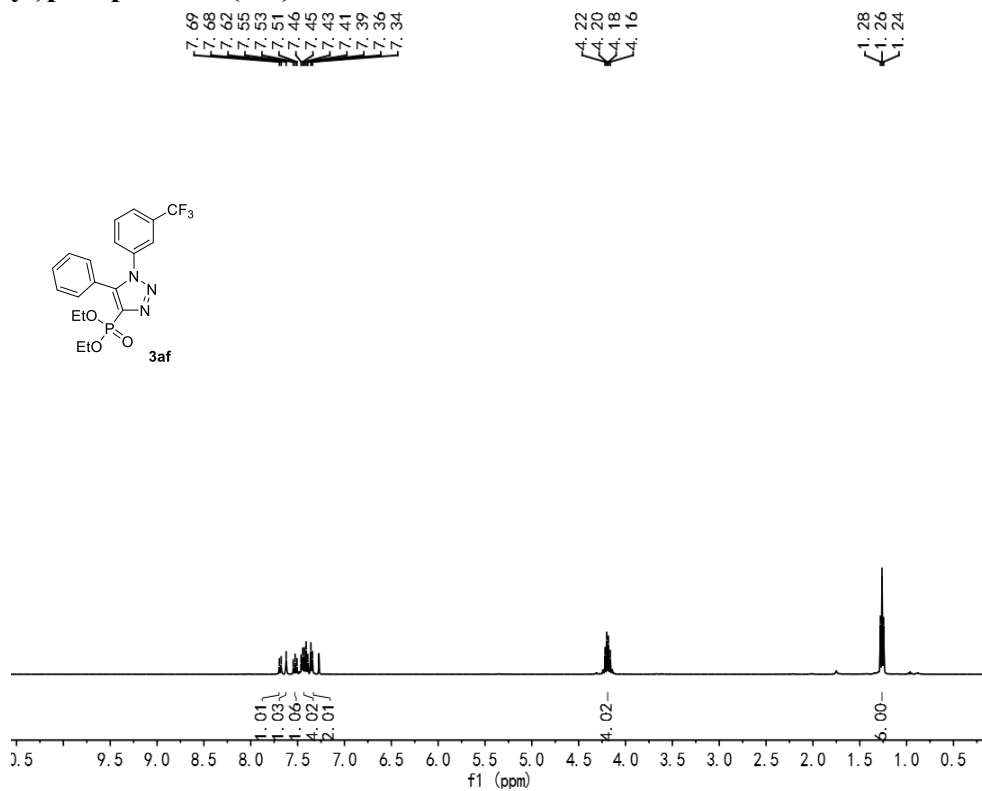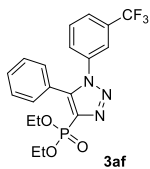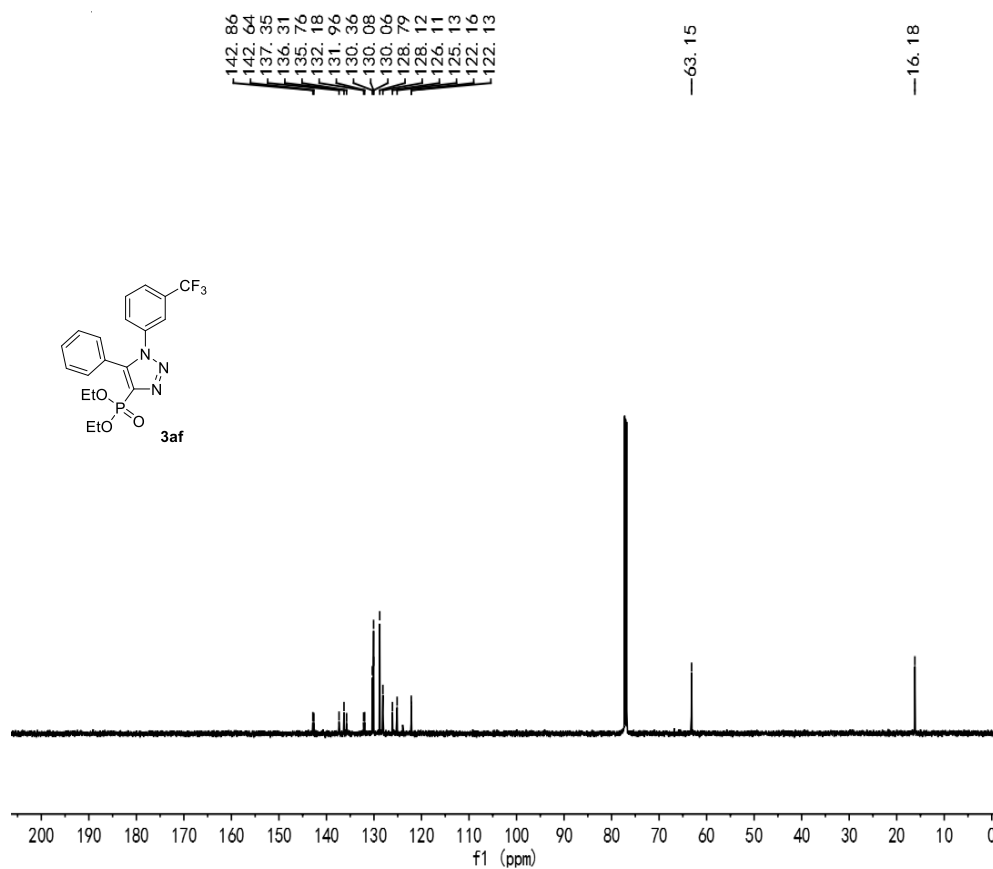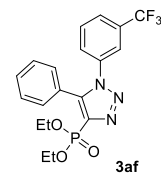

-6.46

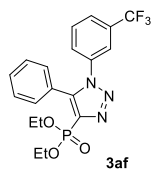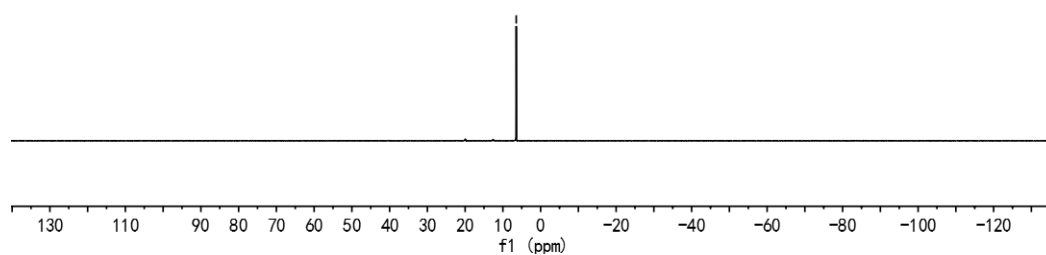

**Diethyl(5-(4-ethylphenyl)-1-(3-(trifluoromethyl)phenyl)-1H-1,2,3-triazol-4-yl)phosphonate** **(3ag)**

7.61, 7.59, 7.52, 7.47, 7.45, 7.43, 7.40, 7.38, 7.17, 7.16, 7.14, 4.17, 4.16, 4.14, 4.13, 4.11, 4.09, 4.07, 2.63, 2.61, 2.59, 2.57, 1.21, 1.19, 1.17, 1.15, 1.14

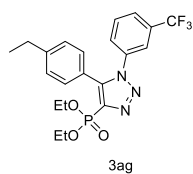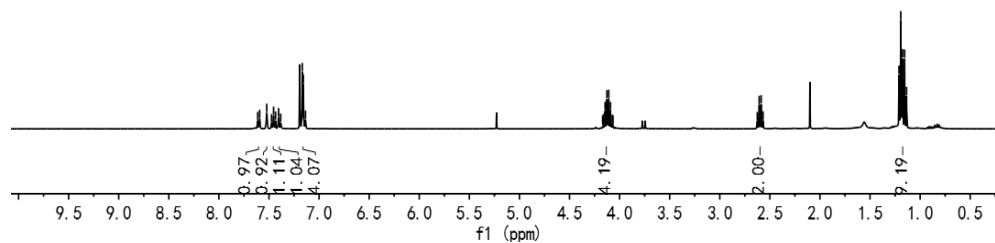

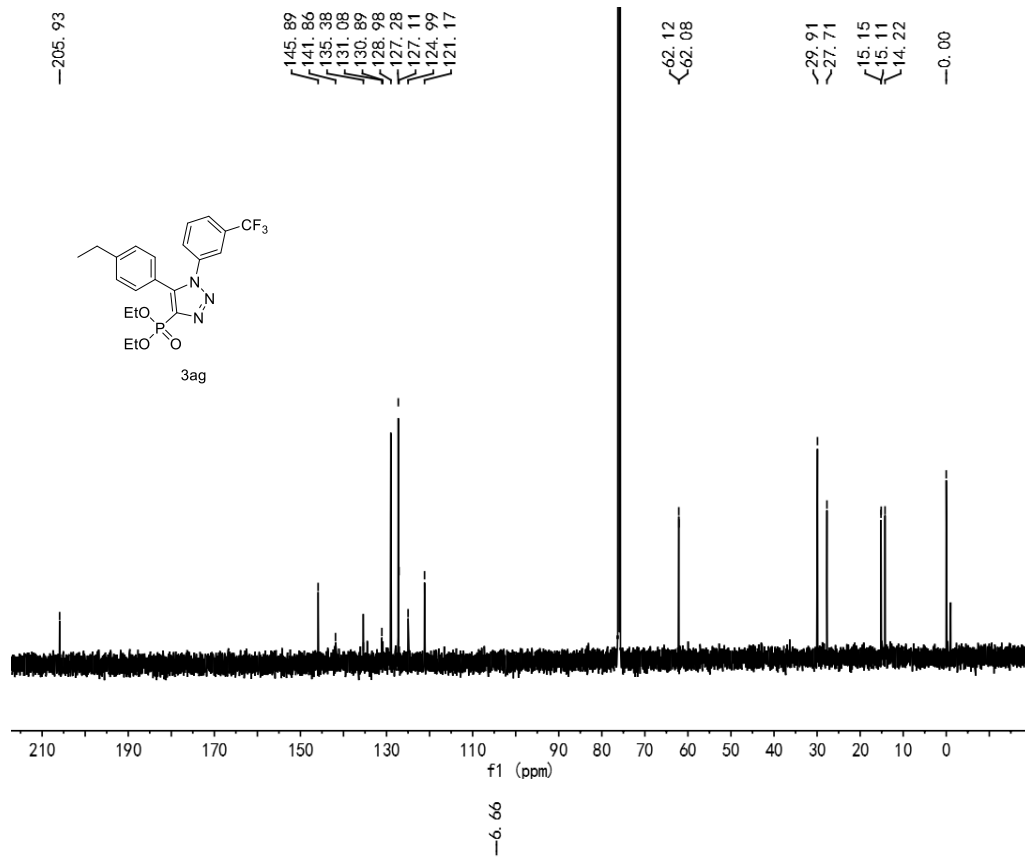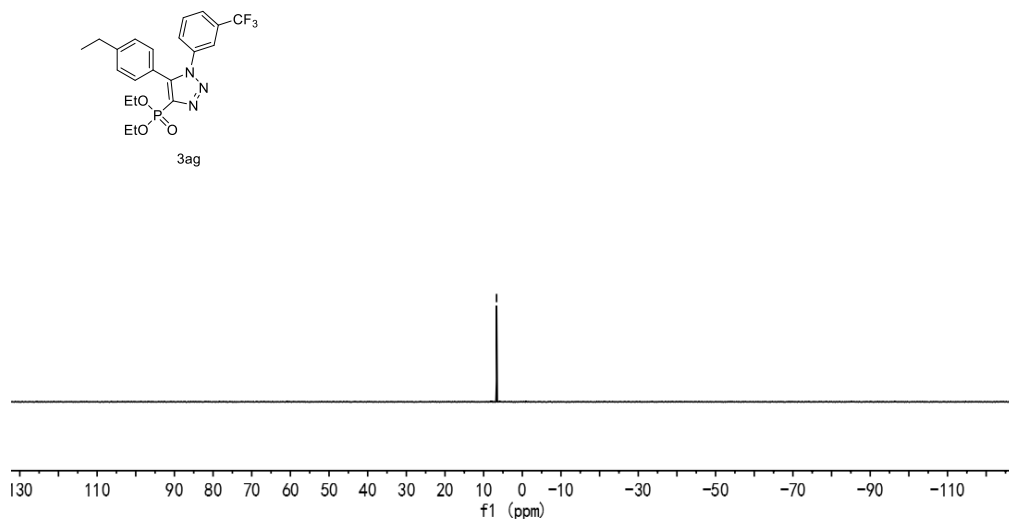

**Dimethyl(5-(4-fluorophenyl)-1-(3-(trifluoromethyl)phenyl)-1H-1,2,3-triazol-4-yl)phosphonate (3ah)**

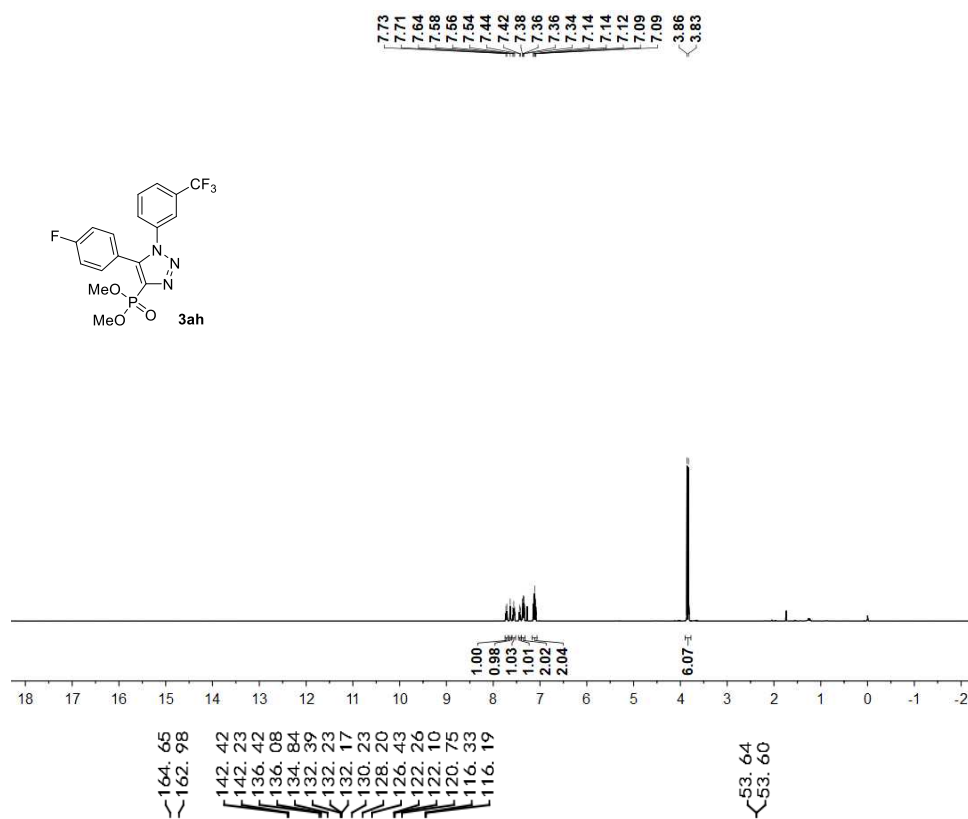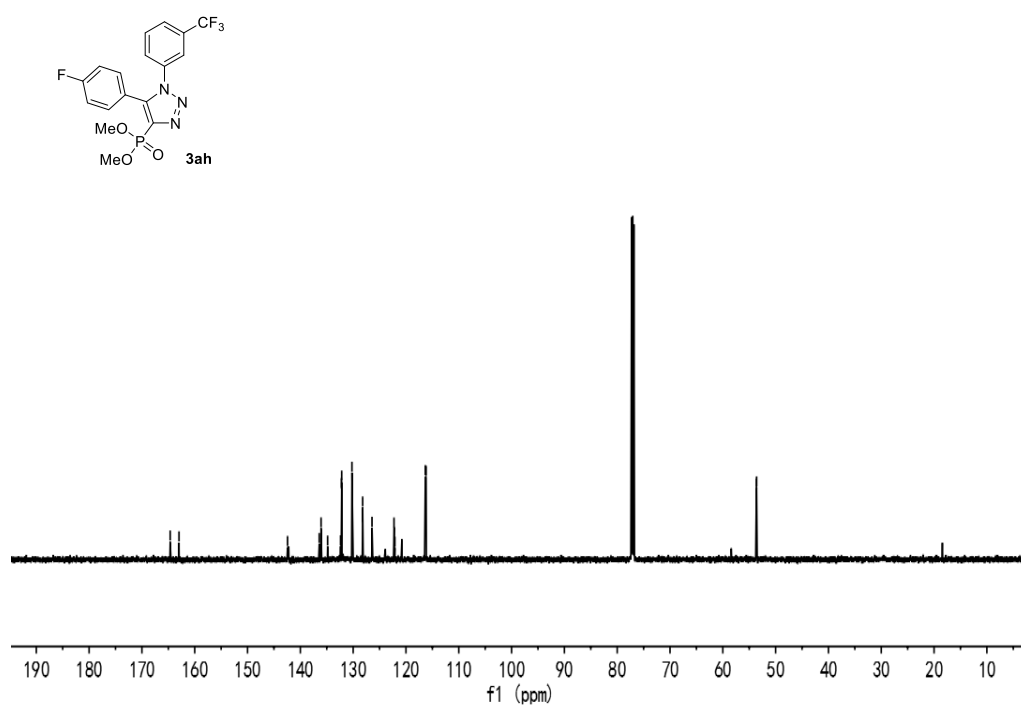

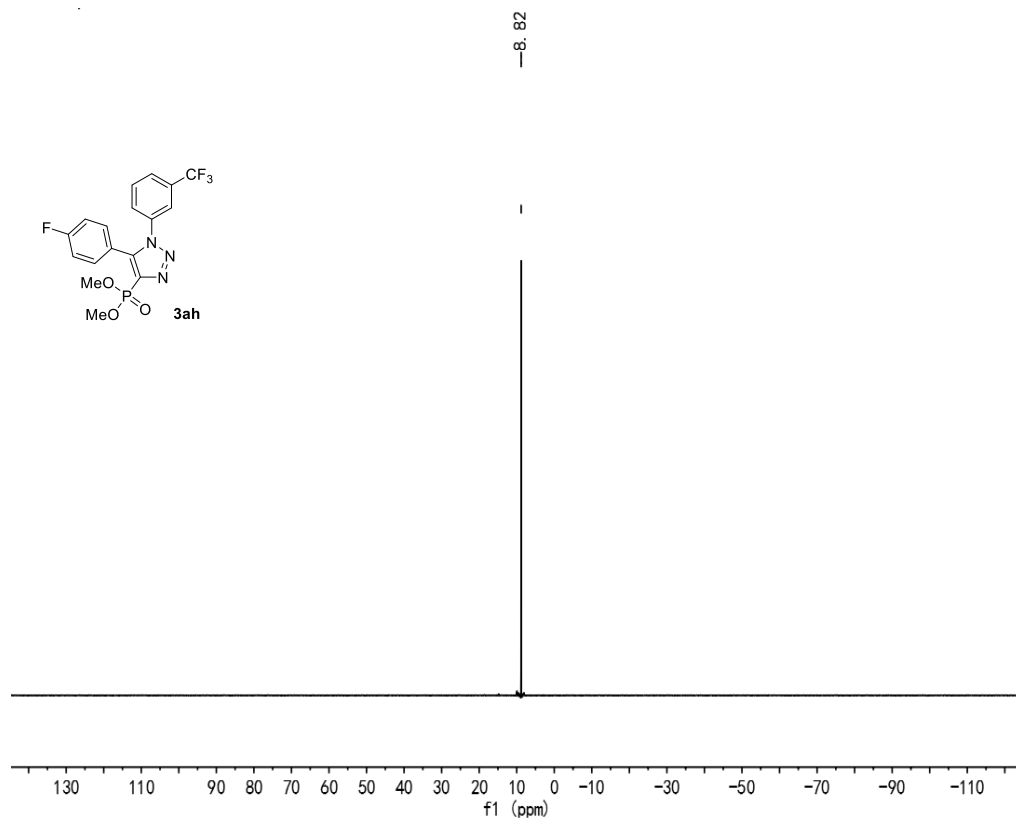

**Dimethyl(5-(p-tolyl)-1-(3-(trifluoromethyl)phenyl)-1H-1,2,3-triazol-4-yl)phosphonate**

**(3ai)**

7.70, 7.68, 7.65, 7.55, 7.53, 7.51, 7.44, 7.42, 7.28, 7.24, 7.22, 7.21, 7.19, 3.83, 3.81, -2.38

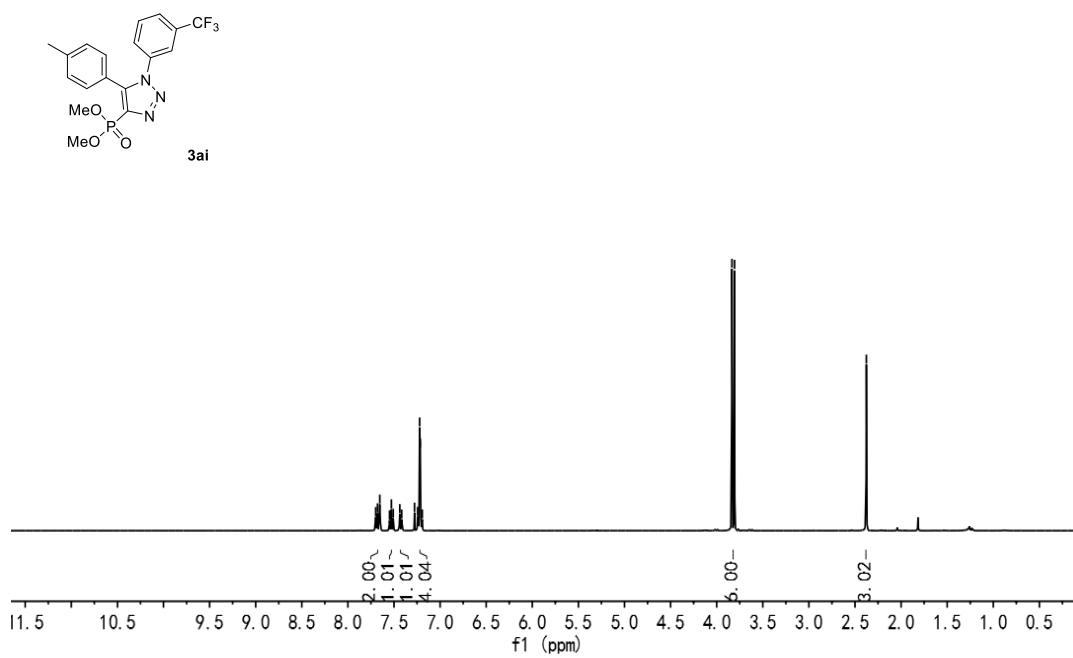

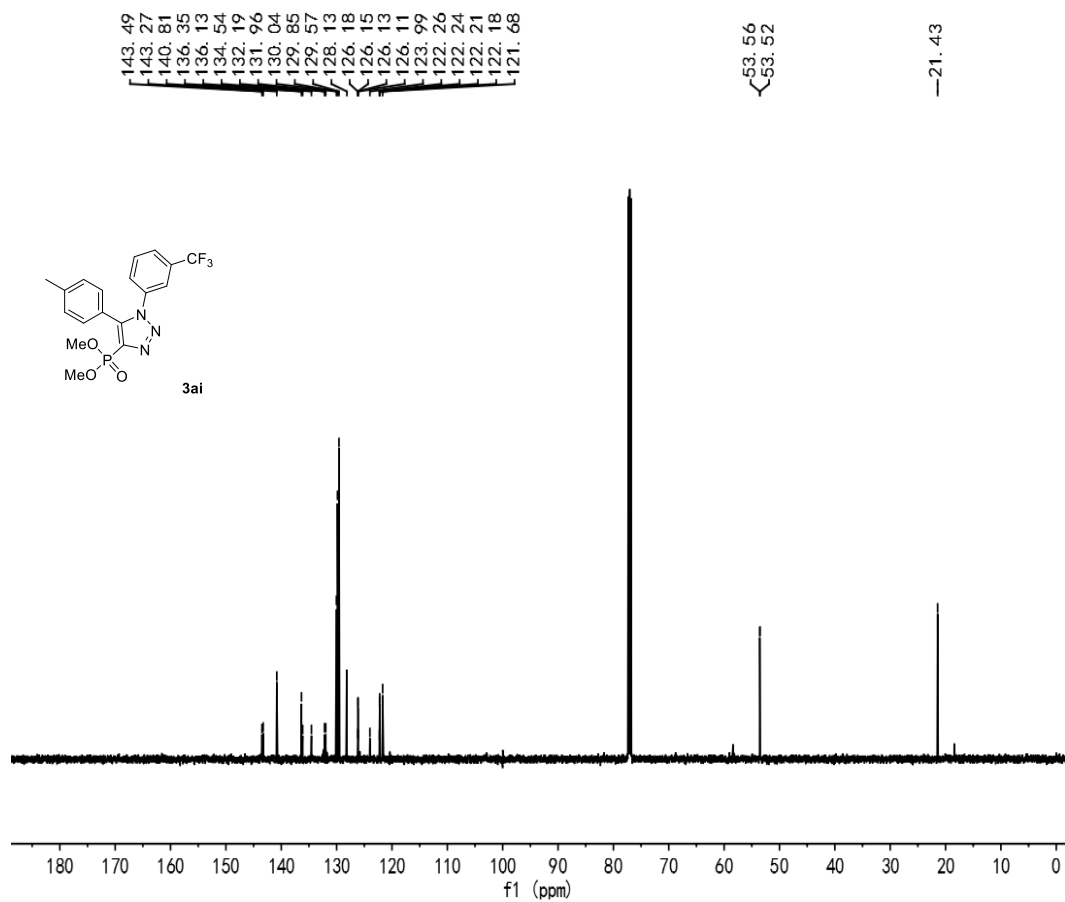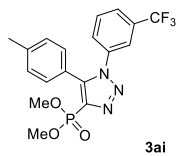

-9.29

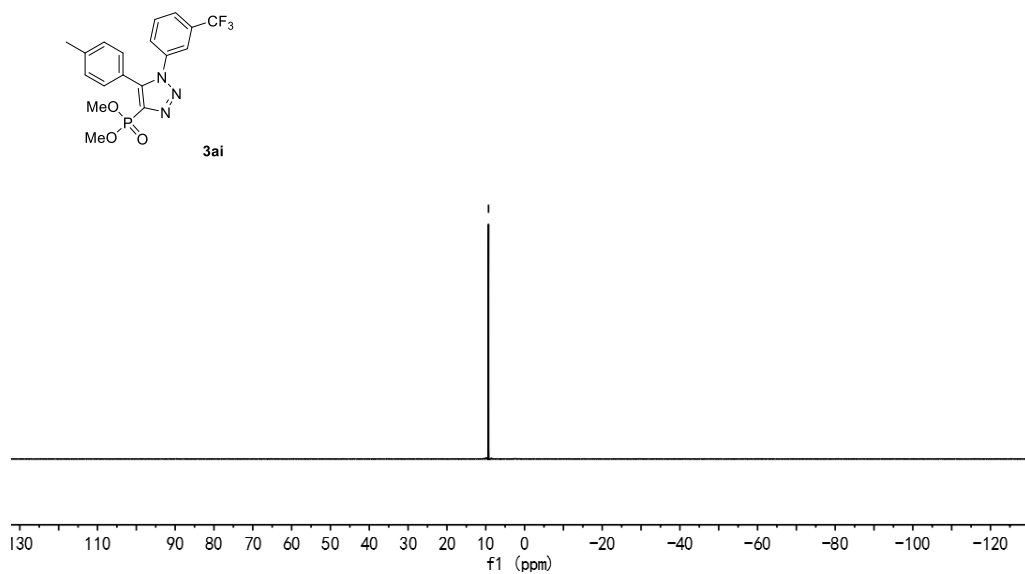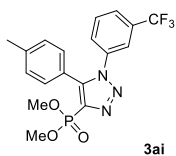

**Dimethyl(5-phenyl-1-(3-(trifluoromethyl)phenyl)-1H-1,2,3-triazol-4-yl)phosphonate (3aj)**

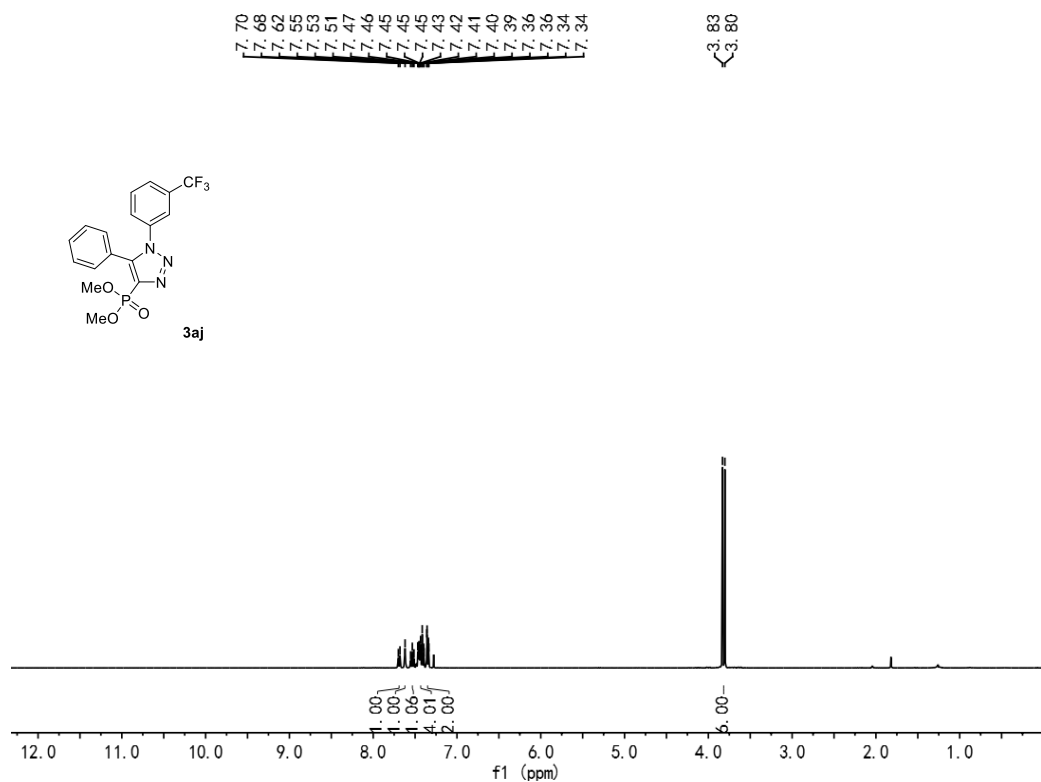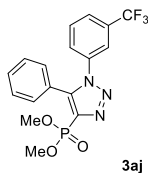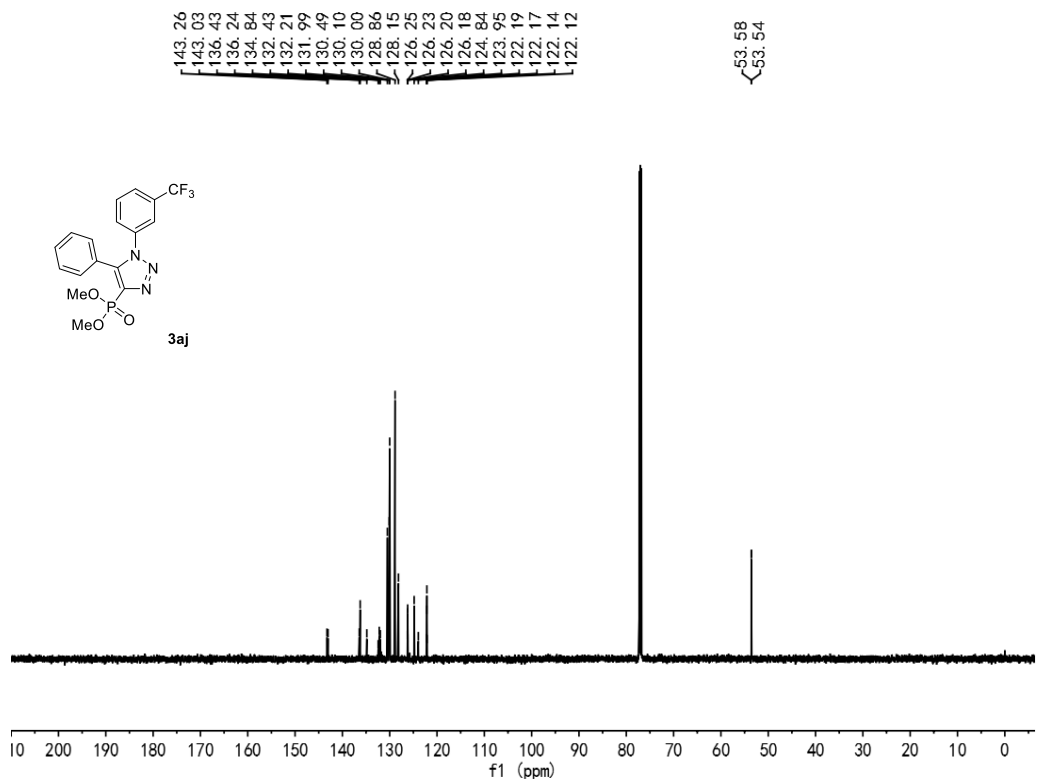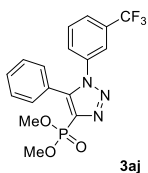



9.09

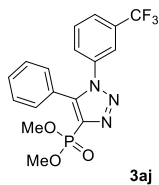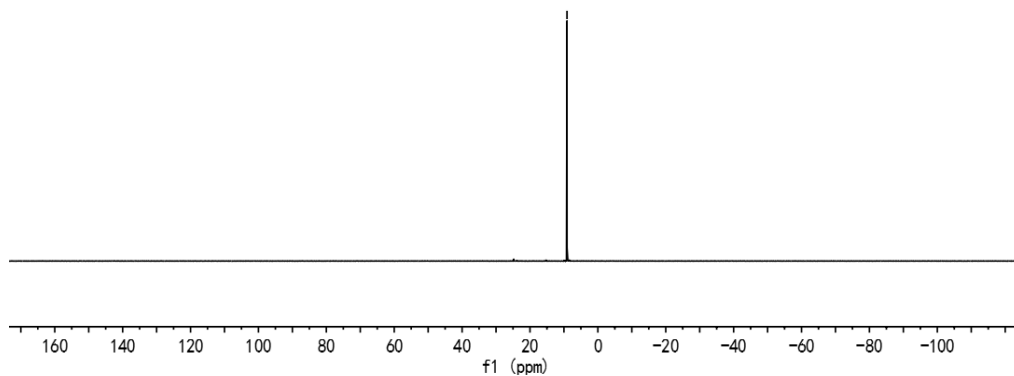

**Dimethyl(1-(4-bromophenyl)-5-(4-fluorophenyl)-1H-1,2,3-triazol-4-yl)phosphonate (3ak)**

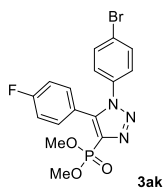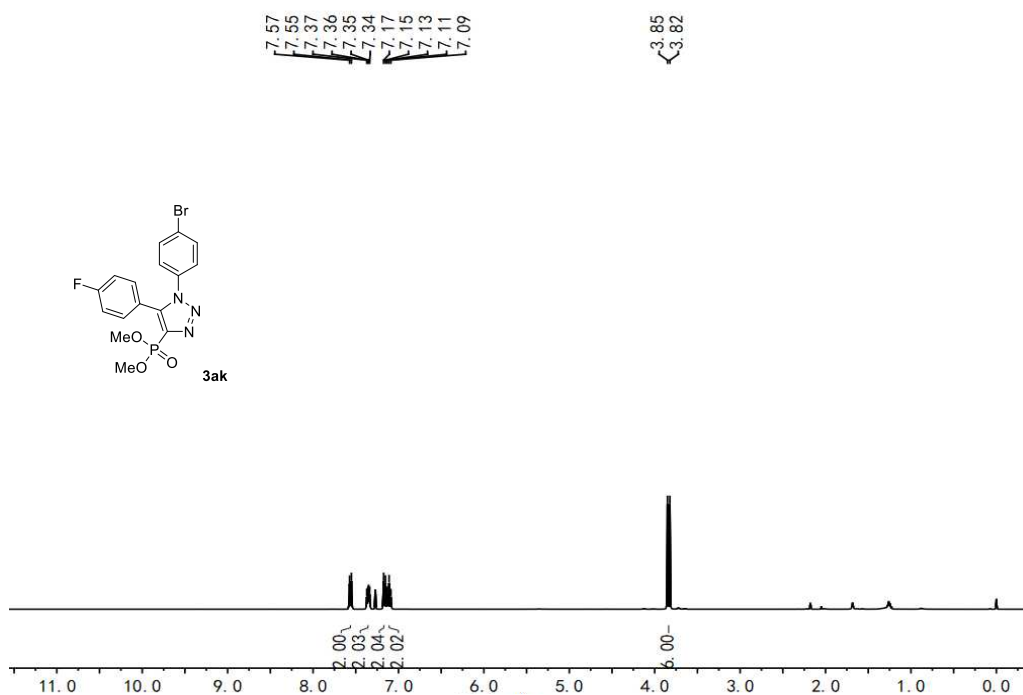

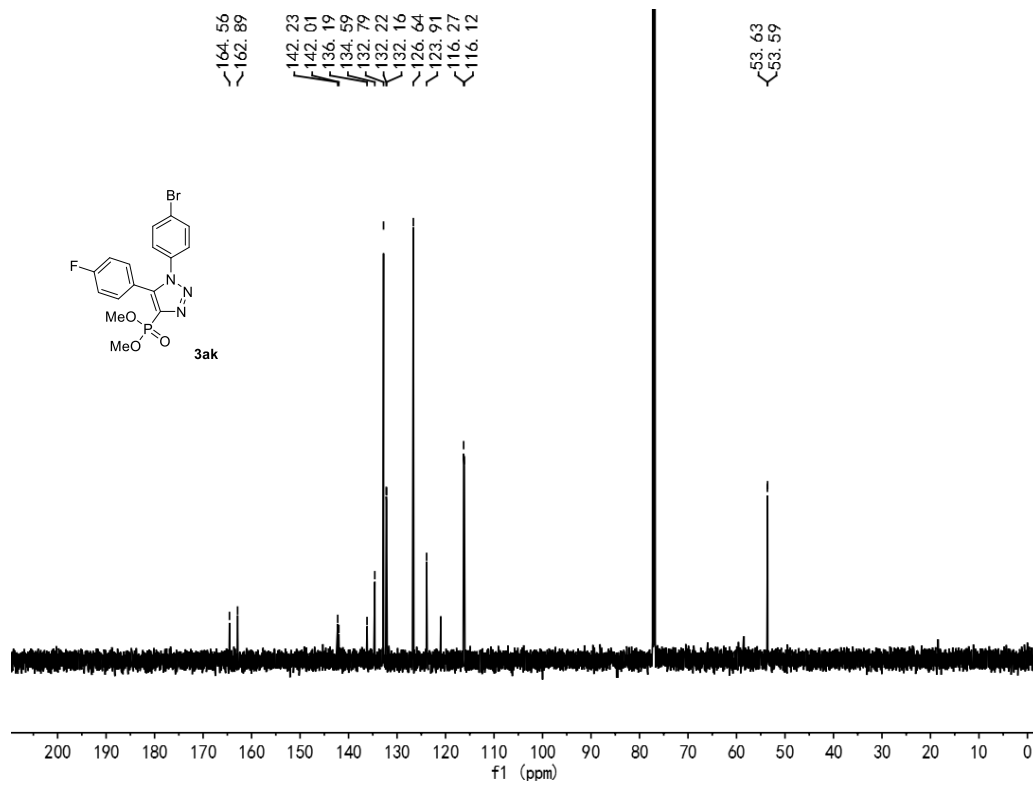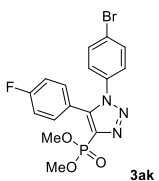

-9.11

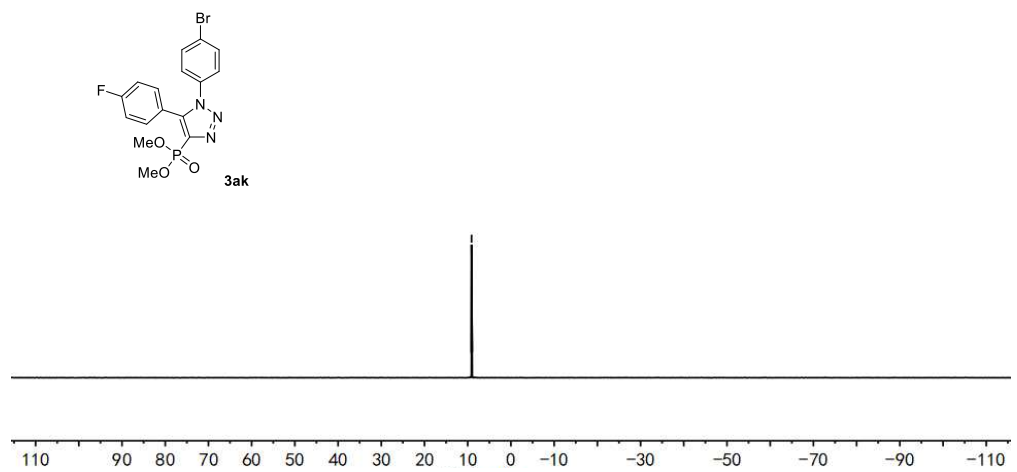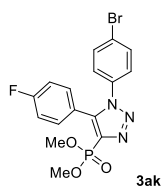

Dimethyl(5-(4-fluorophenyl)-1-(p-tolyl)-1H-1,2,3-triazol-4-yl)phosphonate (3al)

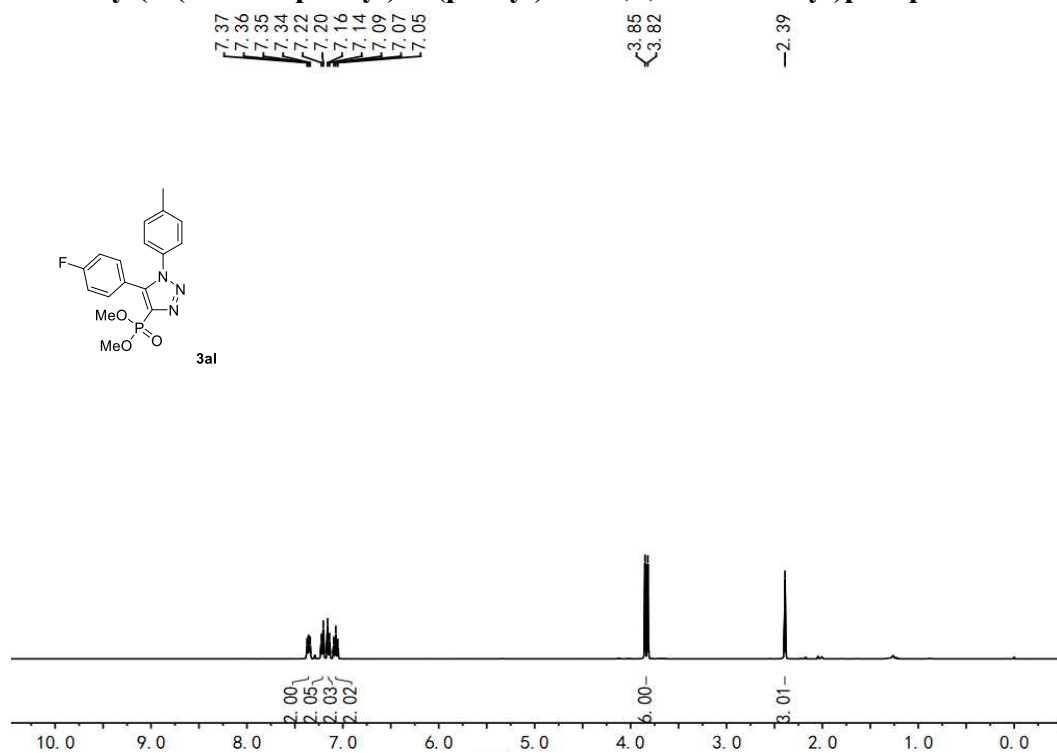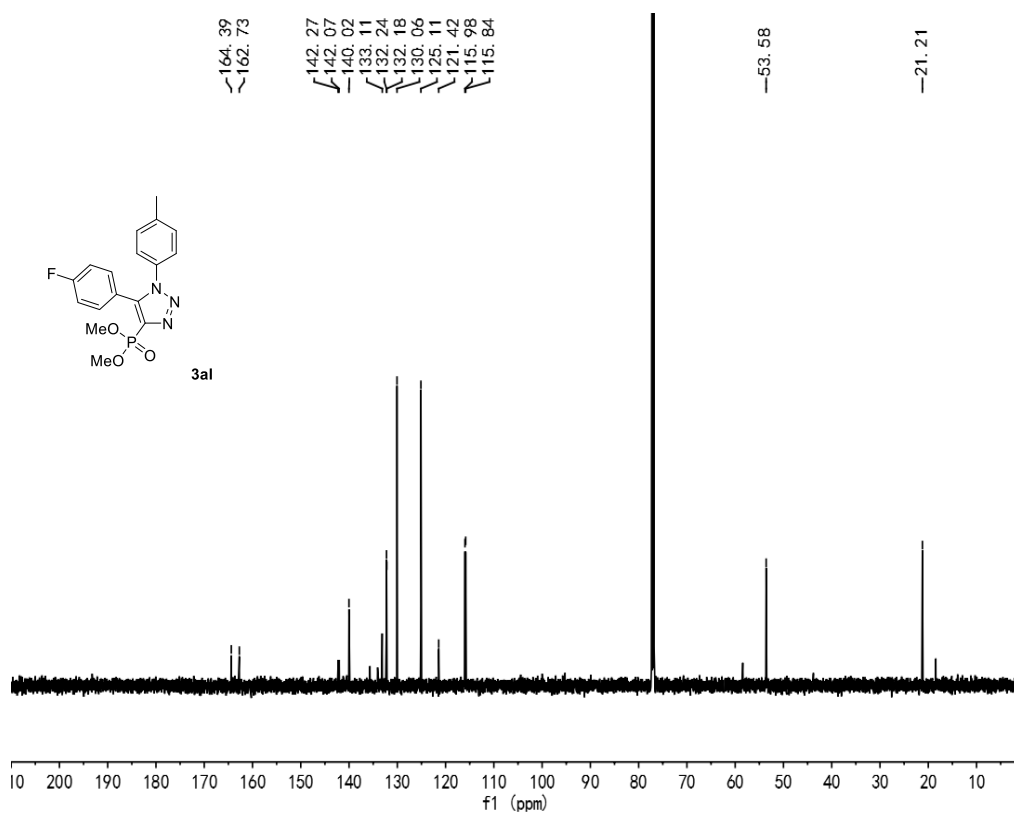

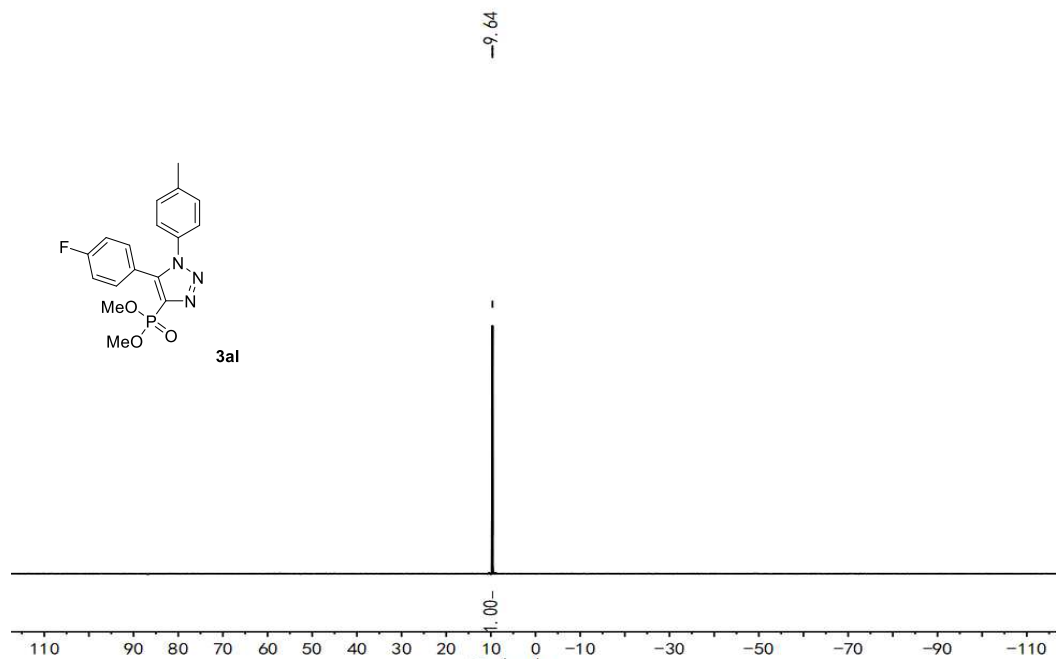

**Dimethyl(1-(3-chlorophenyl)-5-(4-fluorophenyl)-1H-1,2,3-triazol-4-yl)phosphonate (3am)**

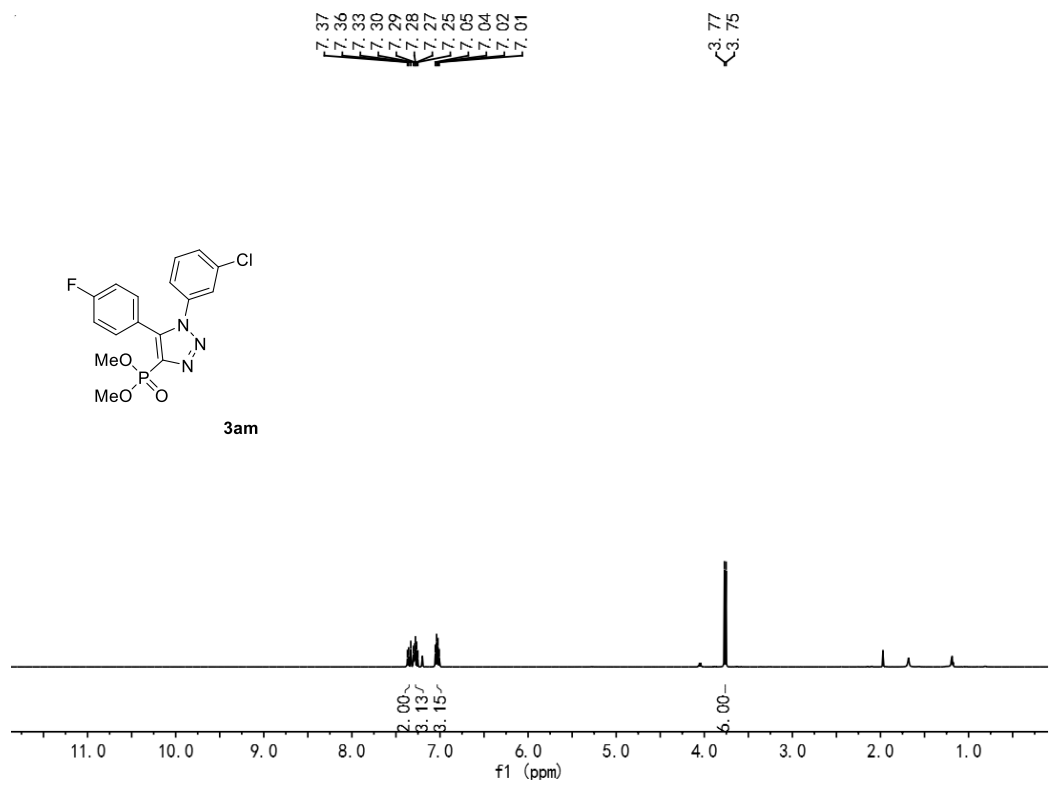

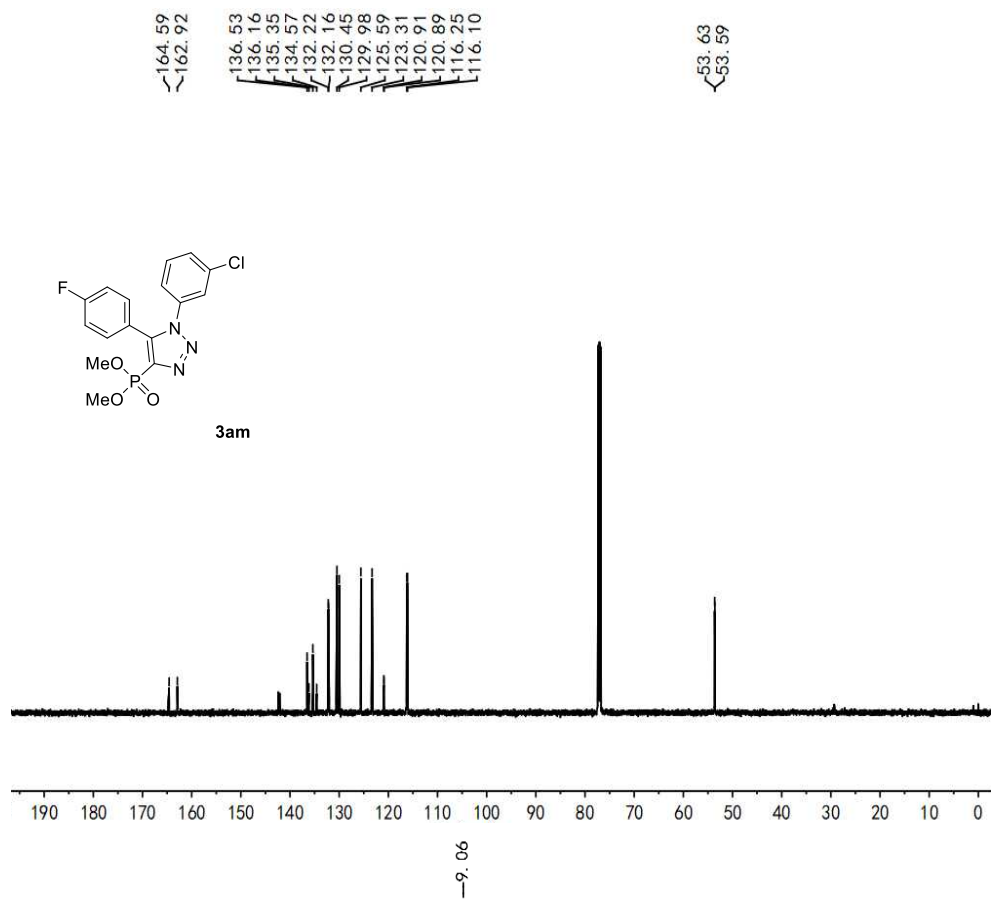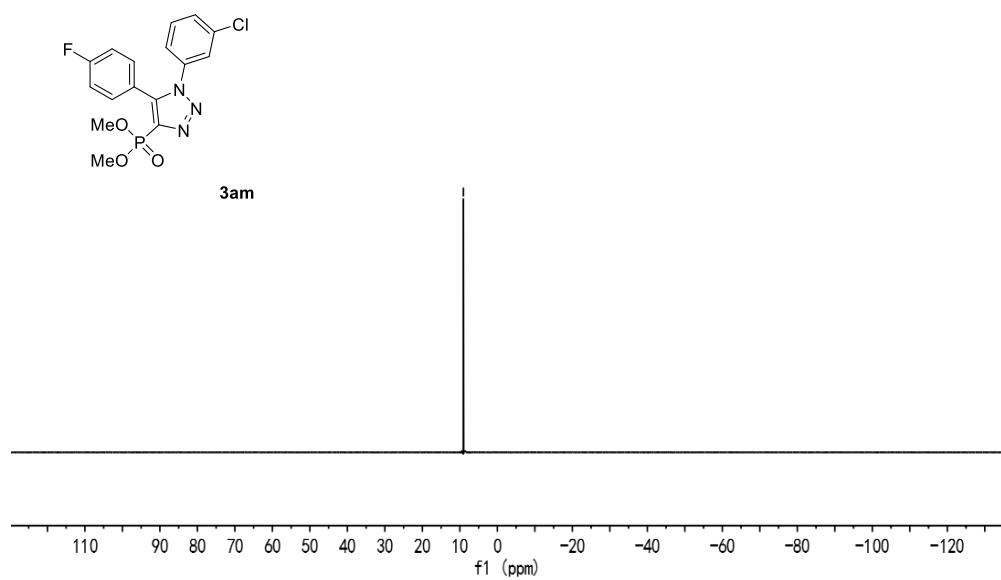

# Dimethyl(1-(3-fluorophenyl)-5-(4-fluorophenyl)-1H-1,2,3-triazol-4-yl)phosphonate (3an)

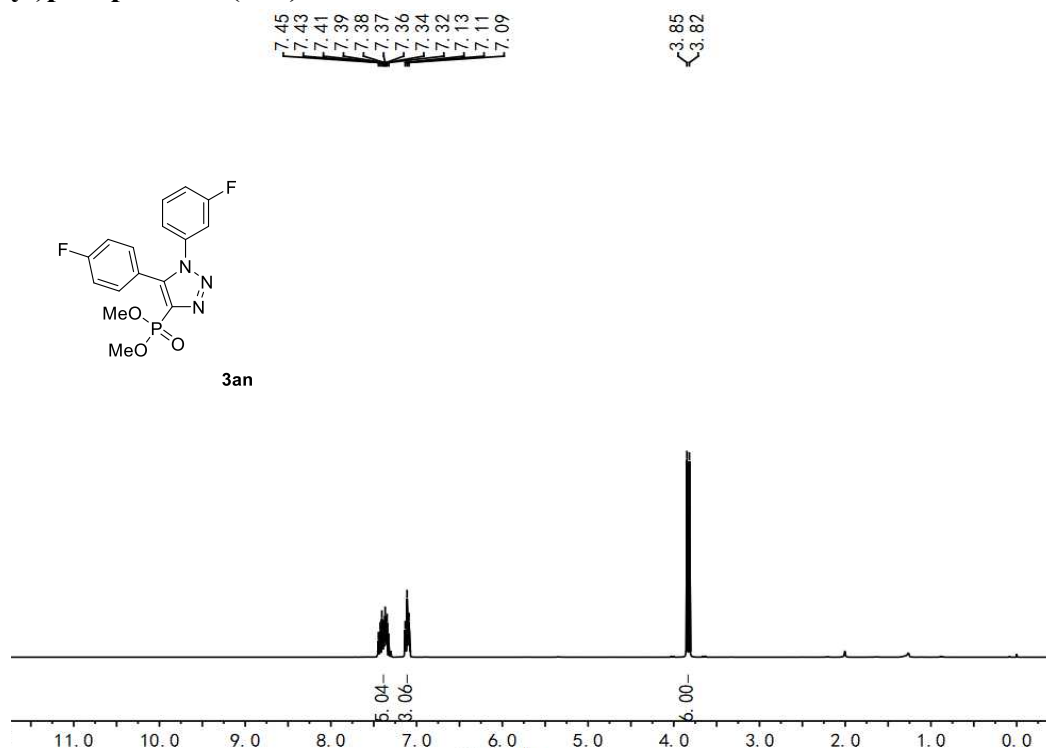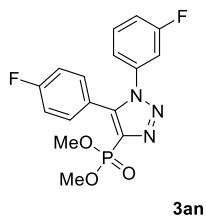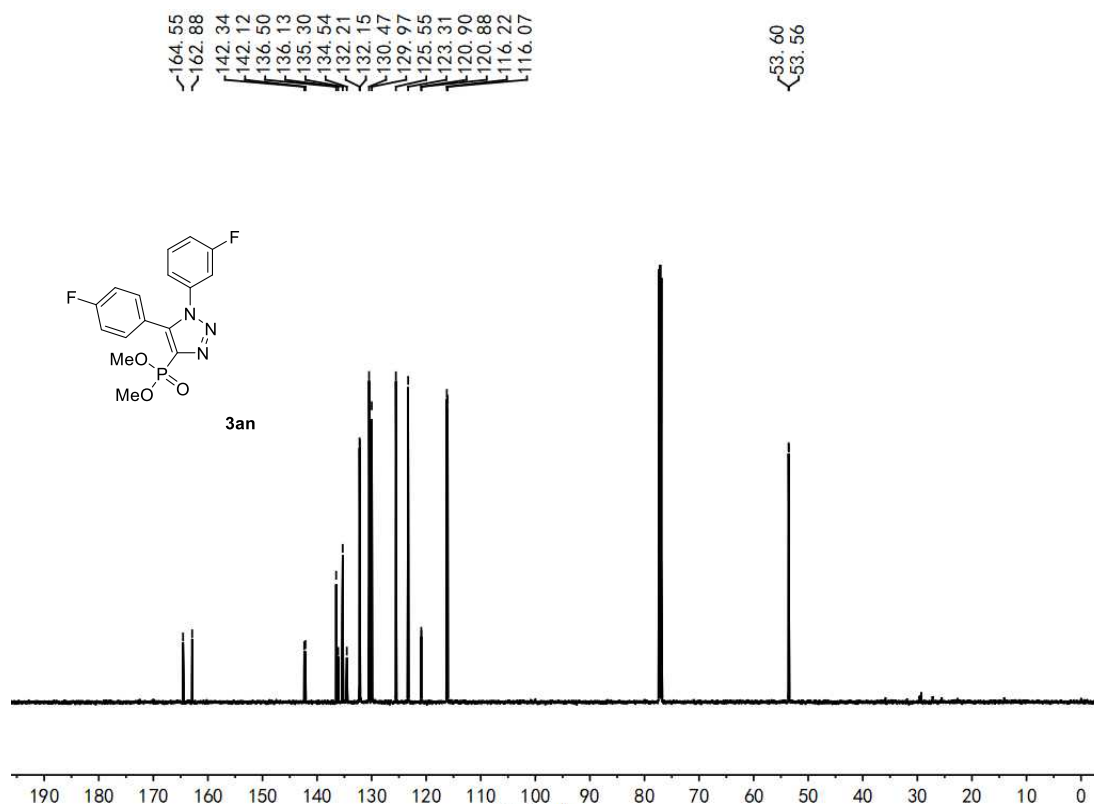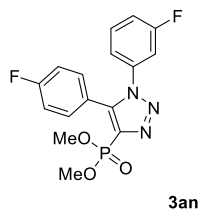

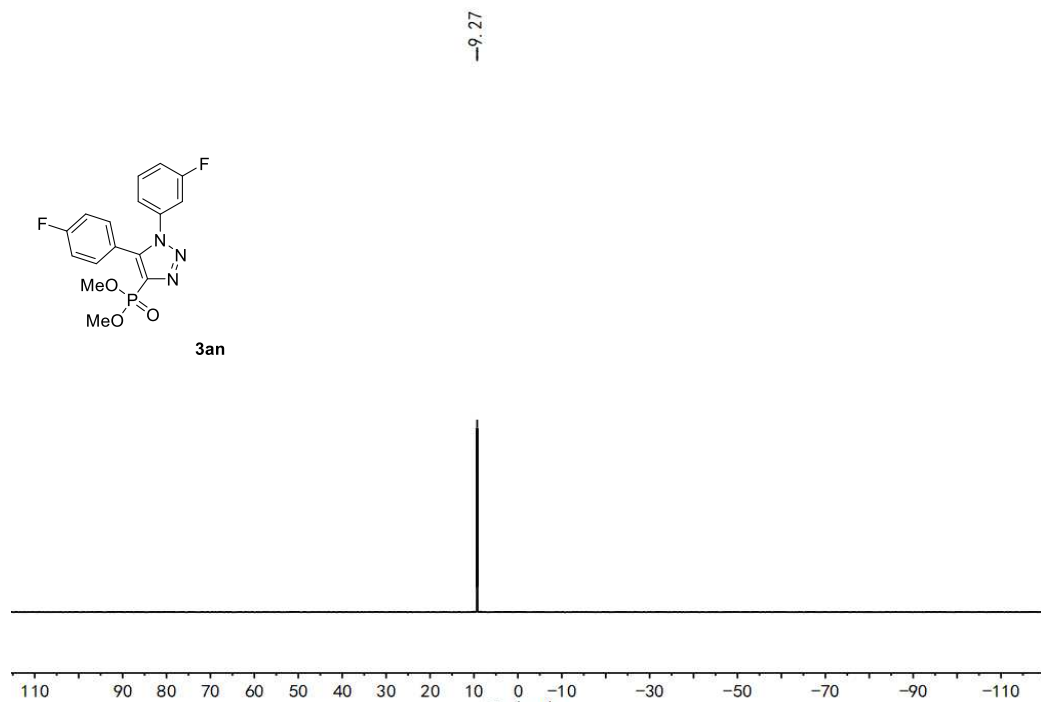

**Dimethyl(5-(4-fluorophenyl)-1-(2-iodophenyl)-1H-1,2,3-triazol-4-yl)phosphonate (3ao)**

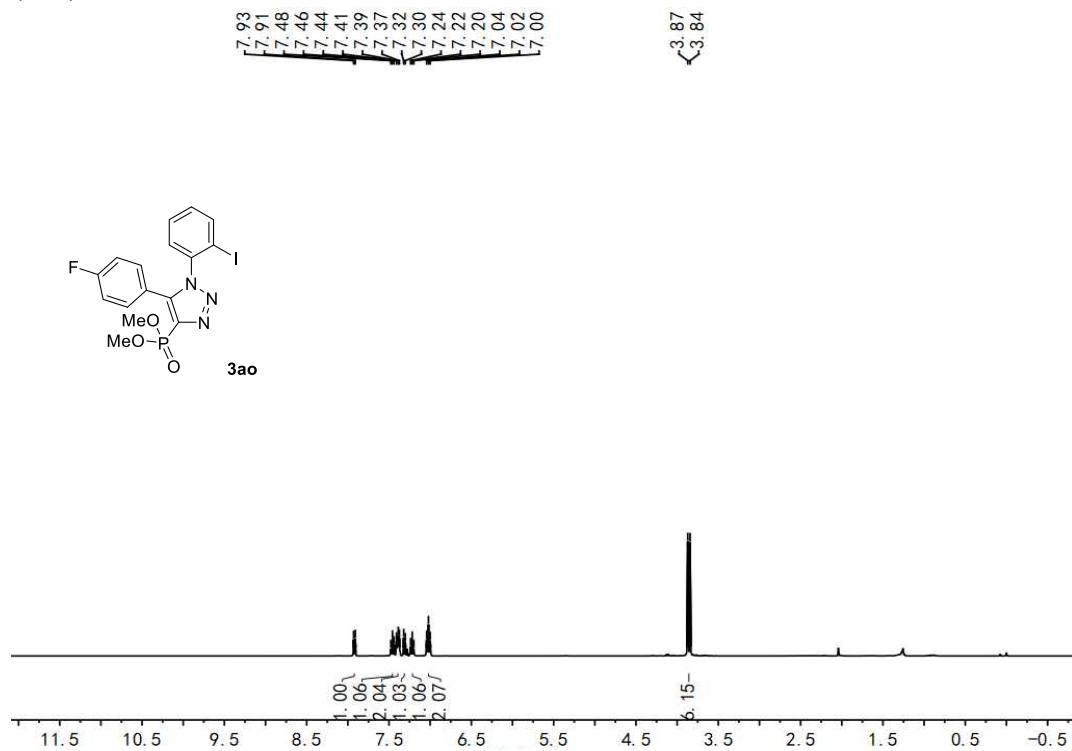

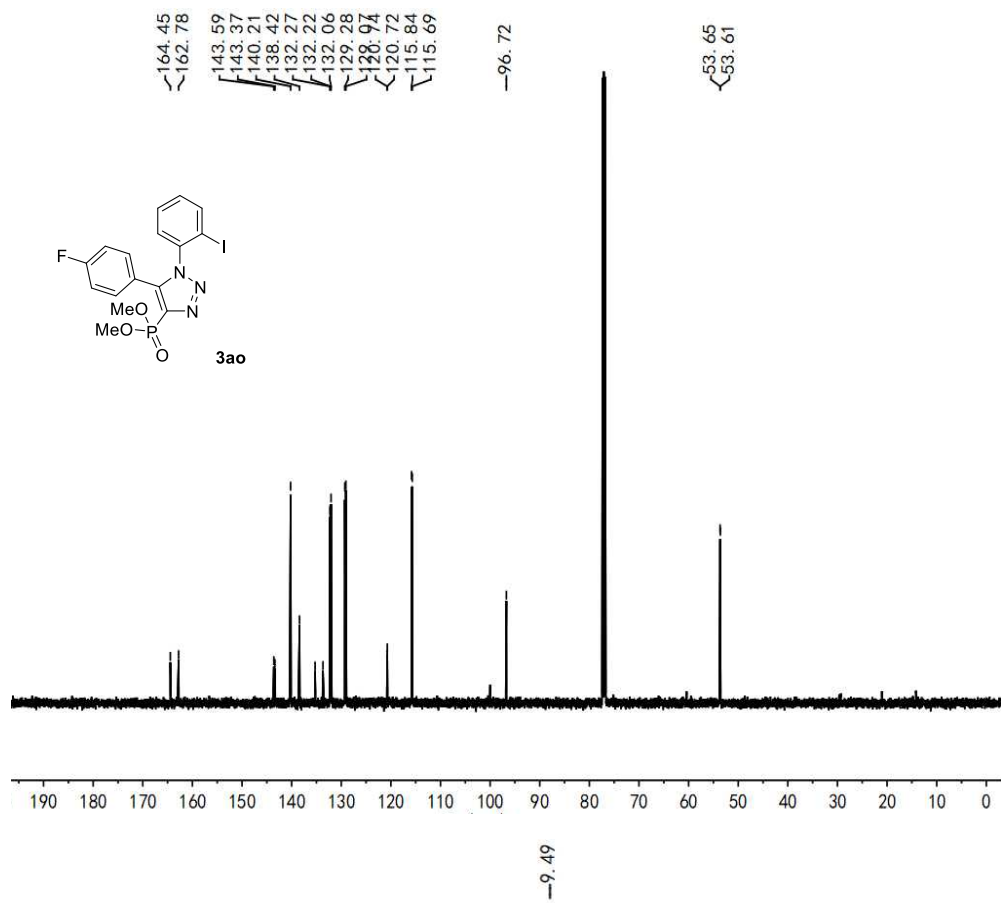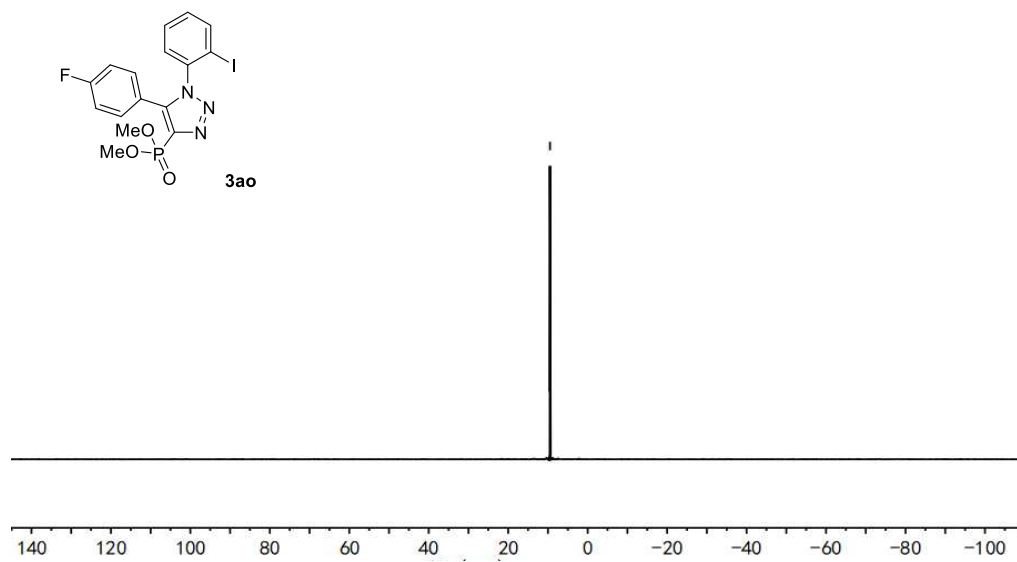



# Dimethyl(1-(3,5-difluorophenyl)-5-(4-fluorophenyl)-1H-1,2,3-triazol-4-yl)phosphonate (3ap)

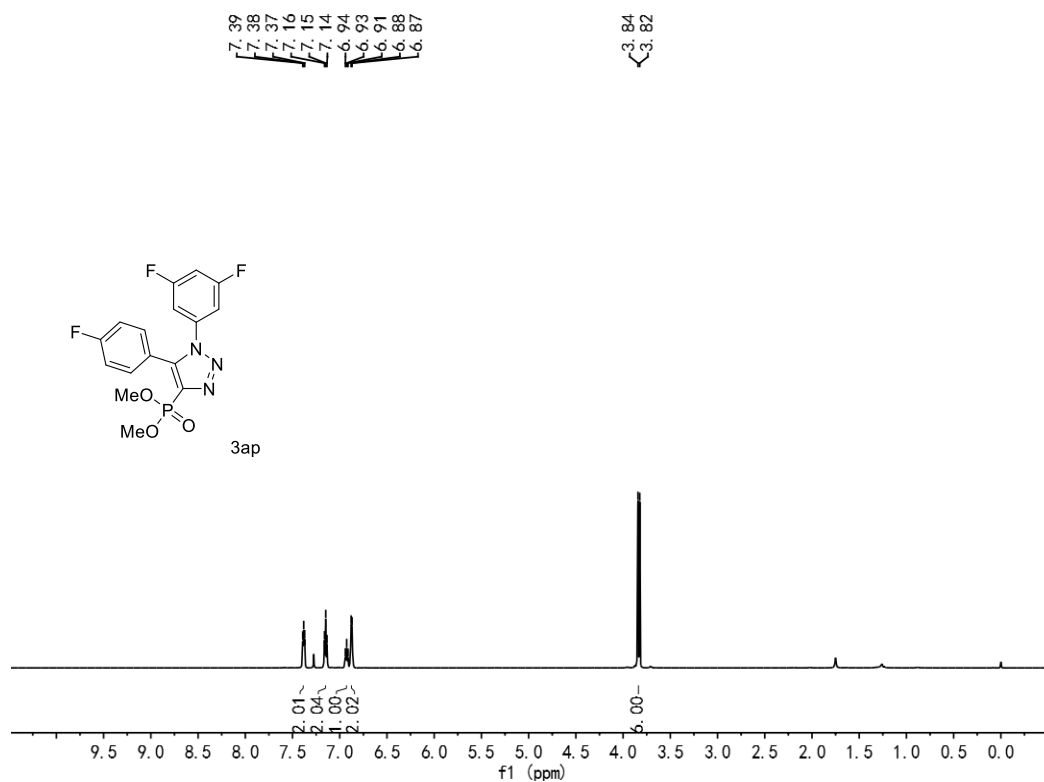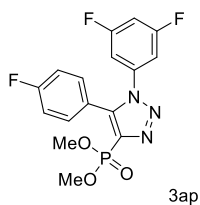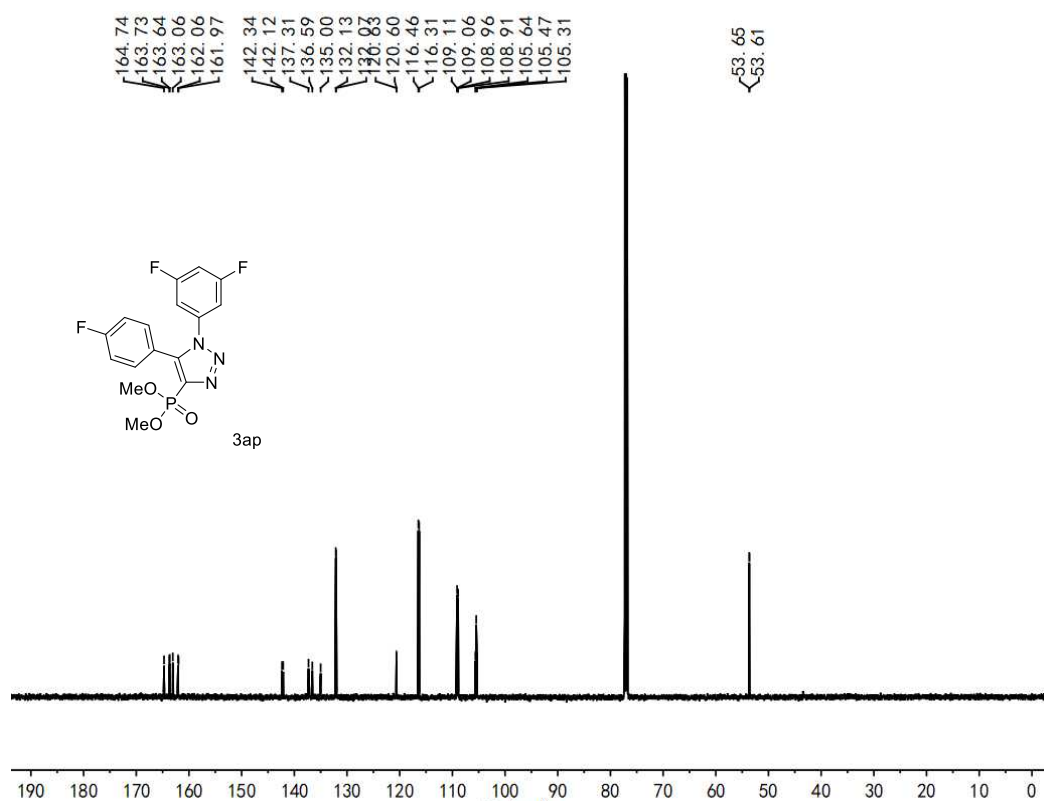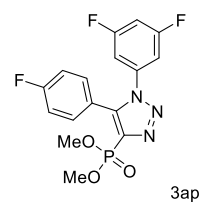

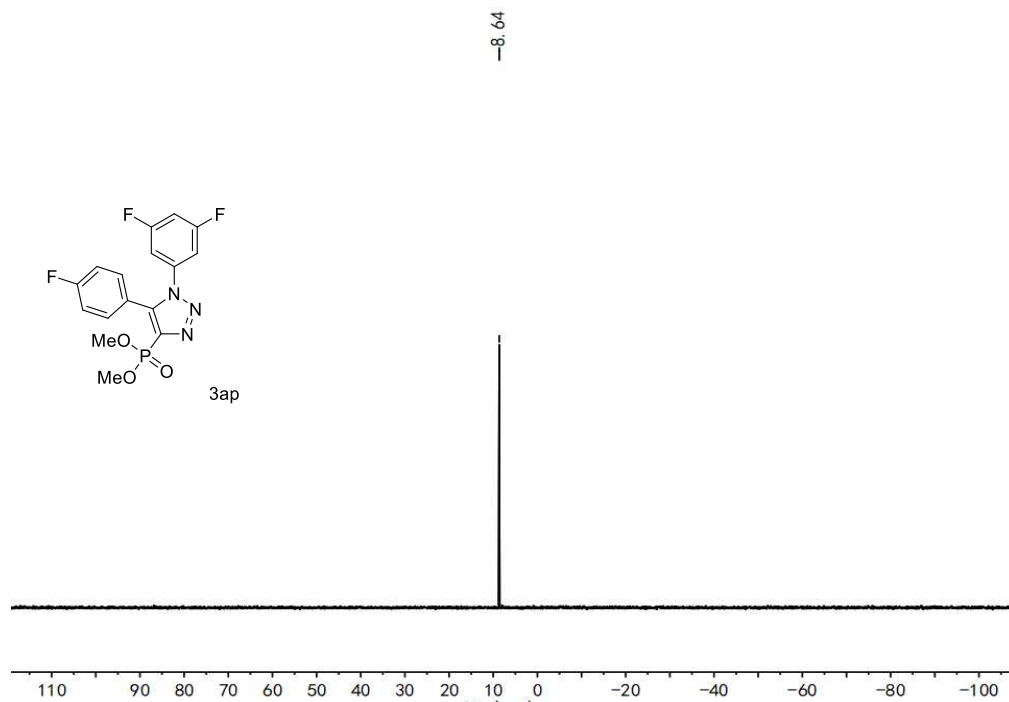

**Dimethyl(5-(4-fluorophenyl)-1-(3,4,5-trifluorophenyl)-1H-1,2,3-triazol-4-yl)phosphonate (3aq)**

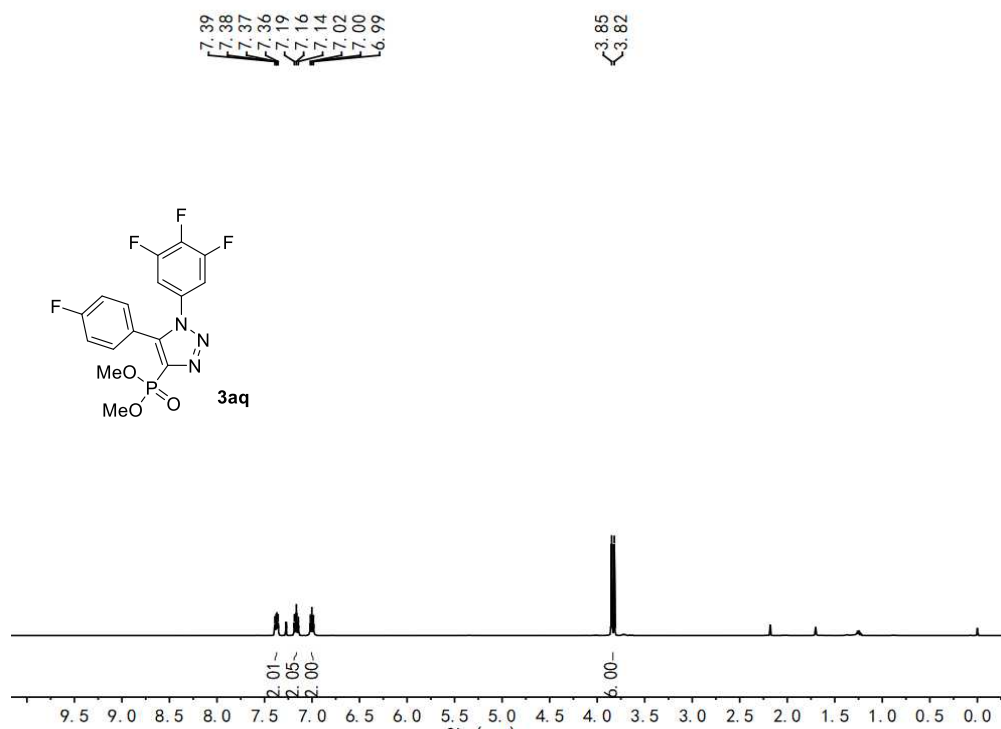

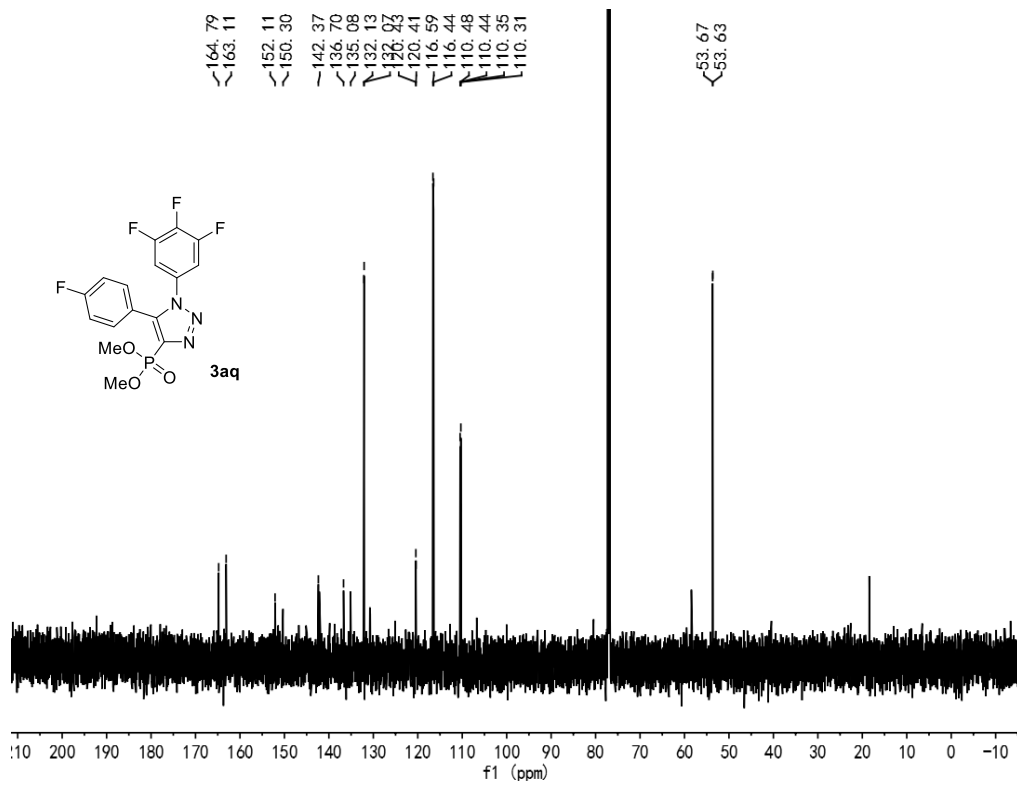

-8.45

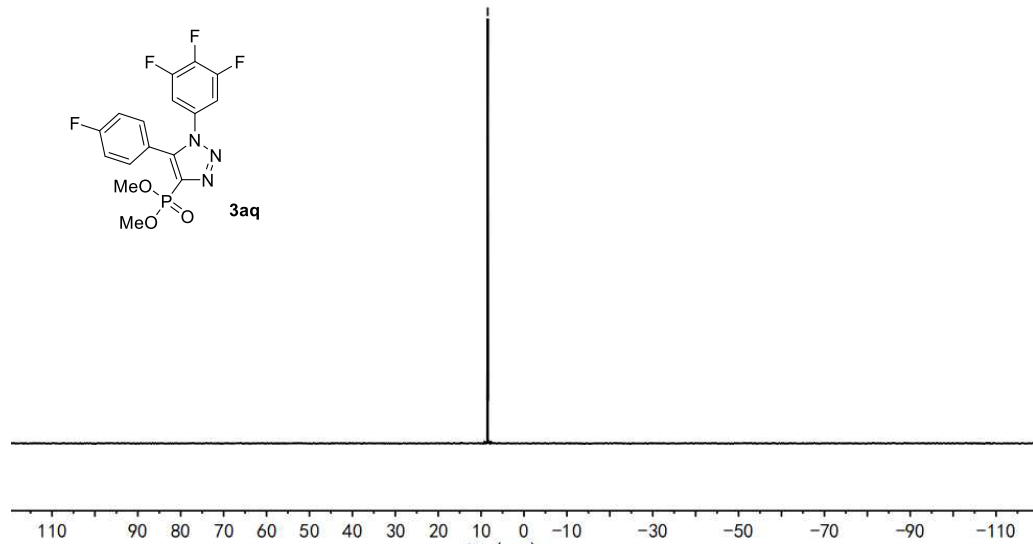

**Dimethyl(1-(3-chloro-4-methylphenyl)-5-(4-fluorophenyl)-1H-1,2,3-triazol-4-yl)phosphonate (3ar)**

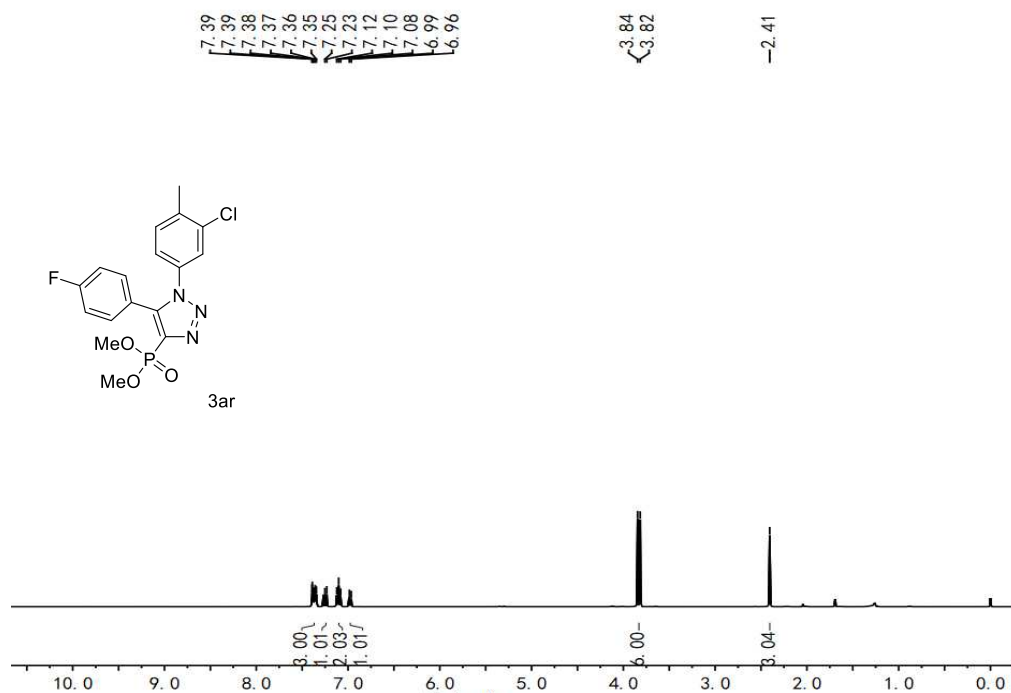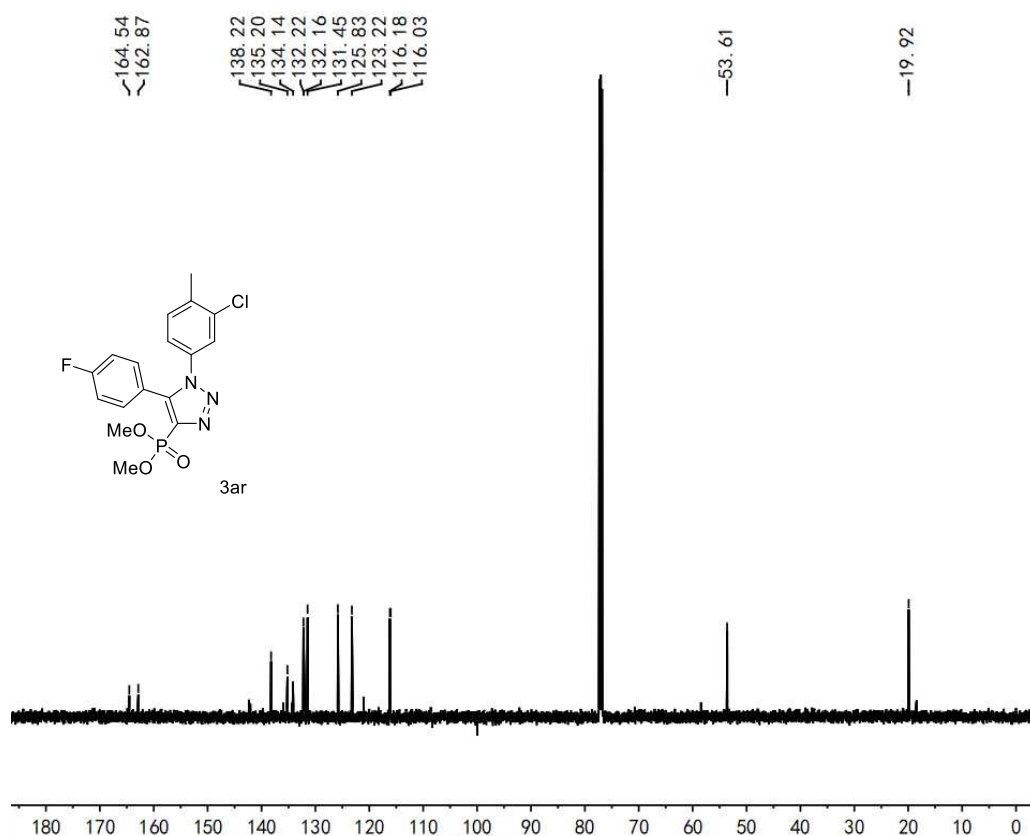

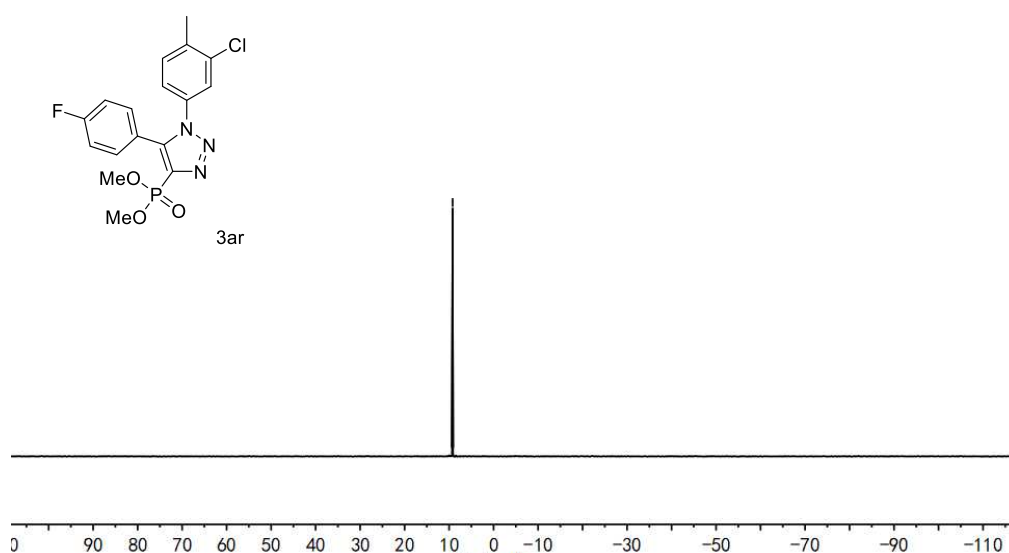

## References

- [1] Chen, X., Li, X., Chen, X.-L., Qu, L.-B., Chen, J.-Y., Sun, K., Liu, Z.-D., Bi, W.-Z., Xia, Y.-Y., Wu, H.-T., Zhao Y.-F. A one-pot strategy to synthesize  $\beta$ -ketophosphonates: silver/copper catalyzed direct oxyphosphorylation of alkynes with H-phosphonates and oxygen in the air. *Chem. Commun.*, 51, 3846-3849 (2015).
- [2] Milburn, R. R., McRae, K., Chan, J., Tedrow, J., Larsen, R., Faul, M. A practical preparation of aryl  $\beta$ -ketophosphonates. *Tetrahedron Lett.* 50, 870-872 (2009).
- [3] Zhu, A. L., Li, L. J., Zhang, C., Shen, Y. T., Tang, M. J., Bai, L. L., Du, C. Y., Zhang, S. J., Wang, J. J., An integrated high-throughput strategy enables the discovery of multifunctional ionic liquids for sustainable chemical processes. *Green Chem.* 21, 307-313 (2018).
- [4] He G., Matsuura H, Takushi T, Kawano S, Yoshihara T., A New Antifungal Metabolite from *Penicillium expansum*. *J. Nat. Prod.* 67, 1084-1087 (2004).
